# Supplementary material for: Full assembly of HIV-1 particles requires assistance of the membrane curvature factor IRSp53
Source: eLife. 2021 Jun 11;10:e67321. doi: 10.7554/eLife.67321 (PMC8260224; doi:10.7554/eLife.67321)
Supplement: Figure 1—source data 1. [file elife-67321-fig1-data1.xlsx]

## Sheet: %Release Calculation Fig 1b 
	SOURCE DATA FOR FIG 1B
	Immunoblot Quantification using ImagJ
					LYSATE			VLP			%Release
	IRSp53		Capsid	GAPDH	Normalized Capsid
	Exp1	siCTRL	17132.8	16382.2	22037.8		siCTRL	17590.2		siCTRL	44.3883		AVERAGE
		siIRSp53	24339	20179.3	31349.3		siIRSp53	7122.03		siIRSp53	18.5126			%Release
													siCTRL	46.2623
	Exp2	siCTRL	67786.8	14655.8	130793		siCTRL	54293.2		siCTRL	41.5107		siIRSp53	20.3792
		siIRSp53	75477.9	28278	75477.9		siIRSp53	16627.8		siIRSp53	22.0301		Std Dev	1.76864
	Exp3	siCTRL	33473.1	22490.8	27210.1		siCTRL	30546.2		siCTRL	52.888
		siIRSp53	22086	12776.2	53552.1		siIRSp53	13889.6		siIRSp53	20.595
	IRTKS				LYSATE			VLP			%Release
	Exp1	siCTRL	42555.6	22490.8	34593.2		siCTRL	37156.1		siCTRL	51.786
		siIRTKS	27199.4	26037.8	52280		siIRTKS	47247.9		siIRTKS	47.472		AVERAGE
														%Release
	Exp2	siCTRL	33473.1	22490.8	27210.1		siCTRL	30546.2		siCTRL	52.888		siCTRL	51.6422
		siIRTKS	52383	26037.8	100685		siIRTKS	42191.2		siIRTKS	29.5298		siIRTKS	49.7017
													Std Dev	21.3742
	Exp3	siCTRL	35807.9	27667.5	35807.9		siCTRL	36171.6		siCTRL	50.2527
		siIRTKS	25064	13546.5	12271.8		siIRTKS	31718.5		siIRTKS	72.1033
