# Supplementary material for: Full assembly of HIV-1 particles requires assistance of the membrane curvature factor IRSp53
Source: eLife. 2021 Jun 11;10:e67321. doi: 10.7554/eLife.67321 (PMC8260224; doi:10.7554/eLife.67321)
Supplement: Figure 1—source data 2. [file elife-67321-fig1-data2.xlsx]

## Sheet: Feuil1
Width of the Bud			Height of the bud
siCTRL	siIRSp53		siCTRL	siIRSp53
101	158		97	43
101	140		93	41
98	235		104	69
98	130		98	71
93	127		88	53
108	110		111	35
86	140		103	42
104	115		107	93
111	137		97	82
96	92		87	71
88	135		96	51
97	145		93	69
98	115		95	47
108	152		85	66
106	87		108	58
104	192		86	56
113	169		91	21
93	170		71	33
83	154		93	53
96	92		103	30
99	145		91	51
138	119		132	32
140	123		129	39
108	109		79	31
122	148		99	43
132	131		131	40
90	107		105	34
126	145		93	39
73	185		69	37
77	113		77	35
86	96		94	45
85	153		105	46
83	228		86	54
84	187		93	51
103	152		93	46
105	115		95	50
97	100		102	45
101	93		96	39
97	118		101	46
85	107		73	54
95	80		93	59
98	121		86	37
108	174		95	37
82	100		82	45
86	142		89	39
96	109		92	37
98	184		91	30
98	153		111	37
91	127		93	40
107	154		107	29
169	132		101	40
185	118		79	47
235	137		122	47
232	119		66	37
158	179		55	48
153	122		88	46
187	183		103	44
135	138		88	55
162	104		41	60
172	174		57	58
152	147		37	61
147	106		49	50
153	104		44	43
158	94		83	50
115	79		46	43
164	118		115	47
164	119		59	42
155	130		82	40
173	130		42	32
139	129		33	42
174	168		34	37
183	137		64	38
138	108		49	49
136	111		53	28
171	111		36	56
120	117		30	43
136	172		34	53
181	95		61	59
141	108		98	50
191	117		55	52
129	136		55	38
180	110		47	38
150	118		57	45
180	132		101	38
173	139		63	42
157	171		80	52
202	117		61	38
125	163		53	57
198	108		58	43
169	96		143	47
114	130		61	43
143	126		78	42
167	137		56	49
178	114		40	42
199	89		59	43
132	90		39	62
149	84		41	62
156	151		39	39
179	84		65	73
136	146		27	47
124	80		103	48
116	125		87	72
173	125		103	69
115	130		47	64
126	127		70	51
84	90		79	46
112	102		60	33
194	171		110	37
134	110		144	43
108	146		148	48
159	206		91	36
172	104		148	47
142	106		61	50
126	171		61	43
139	177		86	40
126	152		37	54
131	145		62	45
100	123		60	35
146	127		63	36
153	143		125	47
113	114		67	54
173	182		104	43
216	213		108	47
140	164		76	40
221	131		109	34
112	153		120	51
144	116		69	46
223	136		87	52
179	108		145	55
194	105		91	53
241	96		112	47
161	89		65	69
194	127		93	51
228	160		117	35
288	76		64	62
227	148		61	51
152	98		84	39
155	118		55	54
116	114		127	59
144	113		81	50
141	138		73	42
84	110		106	42
201	186		68	63
