# Supplementary material for: Full assembly of HIV-1 particles requires assistance of the membrane curvature factor IRSp53
Source: eLife. 2021 Jun 11;10:e67321. doi: 10.7554/eLife.67321 (PMC8260224; doi:10.7554/eLife.67321)
Supplement: Figure 2—source data 1. [file elife-67321-fig2-data1.xlsx]

## Sheet: Feuil1
	Tsg101
	total fractions		total fractions membrane			% fractions membrane
CONTROL	116.541		35.324			30.3104
	51.037		14.633			28.6714
	129.004		31.713			24.583
	total fractions		total fractions membrane			% fractions membrane
With Gag	225.393		156.901			69.6122
	217.877		122.025			56.0064
	37.715		30.411			80.6337
	IRSp53
	total fractions		total fractions membrane			% fractions membrane
	129.544		23.364			18.0356
	289.54		77.123			26.6364
CONTROL	213.4		51.535			24.1495
	39580.6		15813.7			28.5476
	60272.6		14919.9			19.8423
	total fractions		total fractions membrane			% fractions membrane
With Gag	258.477		122.656			47.4534
	273.56		132.586			48.4669
	34382.8		20525			59.6956
	28469.7		28469.7			42.1071
