# Supplementary material for: Full assembly of HIV-1 particles requires assistance of the membrane curvature factor IRSp53
Source: eLife. 2021 Jun 11;10:e67321. doi: 10.7554/eLife.67321 (PMC8260224; doi:10.7554/eLife.67321)
Supplement: Figure 3—source data 1. [file elife-67321-fig3-data1.xlsx]

## Sheet: irsp
0.95309
-0.89185
-0.59264
0.73476
-0.46756
-0.8494
0
-0.84375
-0.8544
-0.88485
-0.61338
0.32467
-0.8434
-0.7538
-0.029444
-0.52757
0.38431
-0.85333
-0.86432
-0.89428
-0.19735
0.90172
-0.37198
-0.54717
-0.46962
-0.44043
-0.39149
-0.32919
-0.38138
-0.37174
-0.11276
-0.3668
-0.19763
-0.39261
-0.54739
-0.57286
-0.62273
-0.43598
-0.46481
-0.46259
0.27322
-0.47339
-0.3346
0.85677
-0.43489
-0.60241
-0.60235
-0.59909
-0.26967
0.18498
-0.59578
-0.60348
-0.55247
-0.52897
-0.69928
-0.27352
0.5922
-0.51516
-0.017611
-0.57701
-0.5835
-0.6846
-0.15519
0.69448
-0.45942
-0.32022
-0.084238
-0.69114
-0.52338
-0.71524
-0.2094
0.93697
0.10045
0.97743
0.94197
-0.32591
0.37329
-0.40638
-0.52631
-0.11546
-0.52014
0.93889
-0.28802
0.33139
-0.50797
-0.1025
-0.45921
0.080022
-0.067369
-0.46983
-0.10559
0.37784
0.90509
-0.0049888
0
0.38967
-0.21435
-0.52254
-0.55891
-0.049382
0.35828
0.025787
0.40464
-0.49621
-0.50351
-0.17434
-0.0488
-0.473
-0.40526
-0.53952
-0.57012
-0.47114
-0.44595
0.29809
-0.71532
-0.92796
0.78389
-0.58005
-0.68182
-0.68358
-0.66095
-0.47062
-0.68064
-0.57132
-0.62788
-0.41186
-0.50613
-0.61516
-0.50668
-0.56982
-0.60202
-0.56211
-0.39613
-0.44366
-0.37227
-0.47076
-0.48603
-0.22254
-0.40317
-0.38655
-0.40755
-0.37709
-0.20794
-0.58718
-0.20101
-0.39185
0.5249
0.40734
0.37996
0.39528
0.39474
0.3927
0.85361
-0.32647
-0.42919
0.91676
0.40747
0.31811
-0.49108
0.042438
0.92051
-0.46333
0.40923
0.88346
0.90249
0.92659
-0.50441
0.38891
0.34991
0.38893
0.67697
0.3491
0.39215
0.59827
-0.06196
-0.34702
0.36659
-0.29984
0.030214
0.39621
0.38198
-0.25073
-0.029409
0.3234
-0.43373
-0.082908
-0.028465
-0.22052
-0.4463
-0.46215
-0.28588
-0.48546
-0.49002
-0.48048
-0.46088
-0.39422
-0.39352
-0.20543
-0.40595
-0.40697
-0.40609
-0.20424
-0.32685
-0.20469
-0.2067
-0.36704
-0.38457
-0.40957
-0.36027
-0.40342
-0.36222
-0.35054
-0.20235
-0.3329
-0.35559
-0.36798
-0.35867
-0.38753
-0.36792
-0.30256
-0.20846
-0.19351
-0.38668
-0.37717
-0.51892
-0.12261
0.12244
-0.51906
-0.51299
0.14014
0.88377
-0.61652
-0.59155
-0.52665
-0.59087
-0.44887
-0.50165
-0.5175
0.32303
-0.55061
-0.34518
-0.55125
0.26981
-0.60615
-0.53301
0.9313
0.29567
-0.44543
-0.4891
-0.50324
-0.8024
-0.75759
-0.73264
-0.65607
0.065013
0.71773
-0.12993
0.85621
-0.32911
0.56497
-0.59992
0.065013
-0.12993
-0.7724
-0.42892
0.046442
0.61579
-0.62051
-0.45116
0.57297
0.74268
-0.54581
-0.74365
-0.016047
0.11579
-0.56217
-0.13831
0.35018
0.28342
-0.70961
-0.70269
-0.65755
0.2079
-0.39842
-0.052688
-0.74777
-0.42475
-0.30628
0.26822
-0.61417
-0.56001
-0.17425
0.32143
-0.61191
0.63887
0.5508
0.32491
-0.67197
0.053554
-0.77844
-0.66363
-0.53705
-0.40172
-0.45528
0.60473
-0.52176
-0.59808
-0.69303
-0.56911
-0.55273
0.61241
-0.64354
-0.62023
-0.58471
-0.29989
0.036954
-0.265
-0.30997
-0.72361
-0.098468
-0.74528
-0.56296
0.38636
0.13882
0.19962
0.25505
-0.61189
-0.3872
-0.60266
-0.33056
-0.42152
0.52799
0.70764
-0.69321
0.69945
-0.46125
-0.67762
0.6548
-0.69207
-0.28024
-0.37486
-0.38255
-0.023583
-0.40274
-0.56623
-0.48694
0.80136
-0.3075
-0.17098
0.36875
-0.54701
-0.51636
-0.45857
-0.50549
-0.60547
0.88754
0.37068
-0.54178
-0.61304
-0.61554
-0.4063
-0.17093
-0.26917
-0.25955
-0.48741
0.058461
0.009834
-0.46503
0.50265
0.3752
-0.20134
0.35718
-0.43198
-0.39762
-0.28961
0.27041
-0.56806
-0.43098
-0.61159
0.43758
-0.4776
-0.57131
-0.5756
-0.35206
-0.016341
-0.52024
-0.45572
-0.63027
0.79046
-0.63176
0.23186
-0.62392
-0.58683
0.20945
-0.50785
-0.61196
-0.39352
-0.39401
-0.52661
-0.46972
-0.45787
-0.53038
-0.51275
-0.3797
-0.4292
-0.55578
-0.51768
-0.50178
-0.15316
-0.46041
-0.4002
-0.55301
-0.26786
-0.52486
-0.29562
-0.28972
-0.29525
-0.48083
-0.37352
-0.15877
-0.5053
-0.5507
-0.36711
-0.5584
-0.52547
-0.47879
-0.11961
-0.46234
-0.45423
-0.41971
-0.30618
-0.19753
-0.43834
-0.38551
-0.41555
-0.45793
-0.4078
-0.4098
-0.42655
-0.37132
-0.42444
-0.40765
-0.42984
-0.060805
-0.43223
-0.39269
-0.50313
-0.419
0.79603
0.9387
0.96474
0.93269
0.38262
0.91884
-0.26662
-0.59268
-0.5397
0.92985
-0.46569
-0.3335
-0.21596
-0.552
-0.60637
0.4963
-0.52678
-0.60197
-0.54587
-0.17093
-0.57227
-0.57636
-0.37624
-0.63768
-0.40916
0.73002
0.1512
-0.54519
-0.39709
-0.17191
0.36128
0.32713
0.066073
-0.50096
0.79638
-0.19074
-0.64131
0.059063
-0.61485
-0.55917
-0.62807
-0.5679
-0.62565
-0.44566
-0.30806
-0.60563
-0.60873
-0.48904
0.11815
-0.46019
0.92356
0.2644
-0.55817
-0.62137
-0.44863
-0.58956
0.84056
-0.60574
-0.60342
0.81567
-0.6065
0.037162
-0.2399
0.28979
-0.58914
0.83688
-0.59559
-0.65254
-0.25333
-0.62845
-0.37735
-0.47312
-0.59277
-0.47998
-0.56217
-0.55562
-0.089552
0.14321
0.19425
-0.60596
-0.45756
0.95073
-0.53934
-0.35242
-0.54219
0.42053
-0.35911
-0.62257
-0.48495
-0.46163
-0.58653
-0.45632
-0.55138
-0.30245
0.19774
0.18706
-0.24273
-0.4074
0.13911
-0.39287
-0.53696
-0.5428
-0.5729
0.13938
-0.068047
-0.33846
-0.5749
-0.068584
-0.57005
-0.31337
-0.37212
-0.20881
-0.40188
-0.38362
-0.60155
0.17978
-0.5866
-0.64844
-0.28213
-0.37765
-0.37072
-0.5609
0.96322
-0.32857
0.84576
0.38374
0.97015
-0.35011
0.95646
0.17814
-0.20384
-0.35108
0.96257
0.91176
0.90525
0.40786
-0.44539
-0.024965
0.65464
-0.65052
0.57423
-0.016034
0.98142
-0.70971
-0.63441
0.43957
0.42618
0.97865
0.5904
0.17521
0.91332
0.66808
0.93232
0.93464
0.71121
0.87144
-0.36814
0.9159
-0.68597
0.95662
-0.60262
-0.17752
-0.40745
-0.61233
-0.70598
0.96853
0.44613
0.85931
-0.1987
-0.61213
0.39707
0.95866
0.14194
0.52288
0.95146
0.93764
0.60608
-0.19429
-0.19703
0.95658
-0.26633
0.97285
0.43904
-0.77962
-0.75243
-0.76831
-0.78147
-0.74673
-0.76626
-0.29414
-0.47191
-0.28569
-0.82698
-0.91028
-0.063328
-0.25874
0.60841
-0.82409
-0.86799
-0.82309
0.16346
-0.90194
-0.91222
-0.95976
-0.48426
-0.5901
-0.74213
-0.89402
0.89685
-0.58286
0.25629
-0.4589
-0.57003
0.51126
0.95305
-0.63657
-0.04799
-0.061851
0.70086
-0.64732
-0.56574
-0.88956
-0.44808
0.96227
0.9313
0.88375
-0.055971
0.91765
0.74949
0.83374
-0.19359
-0.079022
-0.36665
-0.30947
-0.31419
-0.42949
-0.299
-0.3114
-0.45778
-0.21612
-0.23634
-0.43386
-0.37093
-0.20193
-0.19549
-0.36585
-0.4675
-0.57936
-0.37975
-0.46235
-0.37345
-0.48096
-0.38163
-0.39317
-0.37554
0.81025
-0.42603
-0.27668
0.014213
-0.0095572
-0.39121
-0.41033
0.019883
0.96491
0.89307
0.85725
-0.39958
-0.2059
-0.17696
0.49803
0.6802
-0.3196
-0.46033
0.91281
-0.35535
-0.39698
-0.048627
-0.17204
-0.42237
-0.11806
-0.19249
-0.0093785
0.38221
-0.17772
-0.42146
-0.15317
0.80925
0.85049
0.86395
-0.42793
-0.59249
-0.3517
-0.083875
0.1624
-0.46292
-0.56776
-0.60324
-0.63153
-0.15783
0.3581
-0.60893
-0.37474
-0.15827
-0.58776
-0.59592
-0.59173
-0.20185
-0.09788
-0.46332
-0.60865
-0.57993
-0.54973
-0.57411
-0.57302
-0.56666
-0.62949
-0.58418
-0.53298
-0.49562
0.14643
-0.070573
-0.457
-0.40703
-0.52281
-0.3897
-0.38096
-0.37854
-0.25041
-0.3056
-0.37928
-0.10559
-0.38333
-0.42921
-0.34663
-0.37093
-0.30765
0.19417
-0.44682
-0.42758
0.10819
0.39998
-0.61359
-0.46761
-0.59024
-0.34794
-0.089666
-0.52214
0.97387
-0.45917
-0.47988
0.93906
0.96839
0.9205
0.91473
-0.087055
-0.066811
-0.33605
-0.54565
-0.057179
-0.58835
-0.39607
-0.022909
-0.40759
-0.20249
-0.34101
-0.39142
-0.37559
-0.21001
-0.39182
-0.12753
-0.40085
-0.38307
-0.42636
-0.29979
-0.53783
-0.45759
-0.59985
-0.54795
-0.64062
-0.6183
-0.47338
-0.62402
-0.63445
-0.50749
-0.19975
-0.19449
-0.28689
-0.37091
-0.19641
-0.28645
-0.34133
0.11667
-0.35775
-0.21148
-0.42764
-0.41516
-0.39562
-0.36917
-0.42489
-0.44151
-0.4446
-0.074303
0.91721
-0.15471
-0.072498
-0.59206
0.39379
0.2436
-0.53173
-0.21171
-0.34572
0.37434
0.019021
0.038689
-0.21215
-0.45828
0.39428
-0.42312
-0.47767
-0.37427
0.90243
-0.40427
-0.4669
-0.33783
-0.48464
-0.48286
-0.50094
-0.029374
-0.33704
-0.009112
-0.83293
-0.82052
-0.5673
-0.8533
-0.8675
-0.9407
-0.59673
-0.85144
-0.25967
-0.41832
-0.55975
-0.57238
-0.48645
-0.47382
0.31825
-0.15281
0.23251
-0.28525
-0.025784
0.88255
-0.6435
0.21492
0.88145
-0.66874
0.27631
0.25796
0.0057534
0.95181
-0.029065
0.44057
0.95856
-0.61032
-0.4337
0.90019
0.2742
0.9092
-0.39059
-0.38792
0.1476
0.47129
-0.31314
0.099772
0.93404
-0.028729
-0.8325
-0.20748
-0.02871
-0.68787
-0.2703
-0.71086
0.12118
-0.42773
0.92975
0.60521
0.71658
-0.34614
0.087442
-0.33937
-0.2845
-0.7082
0.063339
0.68556
-0.5523
0.61646
0.38539
0.51192
0.18291
0.99104
0.60015
-0.11955
0.95236
-0.19431
0.99547
0.87367
-0.47167
-0.63863
0.67963
0.96981
-0.3795
0.98505
0.31867
0.3137
0.96331
0.69722
0.80865
0.67931
0.85646
0.33935
-0.43512
0.96919
0.97064
0.964
0.93719
0.90857
0.85438
0.56641
0.6543
0.84593
-0.73077
-0.46786
0.53077
0.98286
0.73771
0.93764
-0.25193
0.59956
-0.50932
-0.71405
0.56065
0.58702
0.97727
-0.28421
0.78368
-0.60668
-0.48503
-0.22112
0.85322
0.046955
0.81009
0.9753
0.87173
-0.58426
-0.36851
-0.84224
0.84843
-0.21186
0.93909
-0.67279
-0.40047
-0.17916
0.21534
0.89012
-0.70108
-0.22187
-0.54982
-0.017183
-0.62696
-0.37479
-0.21993
-0.22908
0.20825
0.6284
-0.028896
0.2874
-0.58188
0.30677
0.96967
0.21415
-0.32609
-0.80912
-0.68836
-0.28481
0.87357
-0.34277
-0.71254
0.29032
-0.69128
-0.1479
-0.30143
-0.5957
0.061744
-0.29461
-0.22262
-0.39806
0.98144
-0.15513
0.18479
0.86144
0.17836
0.88543
-0.147
0.58808
0.90944
0.9511
-0.59716
0.97949
0.075907
0.91254
0.50872
0.076678
-0.70002
-0.40472
-0.62645
0.075722
0.16722
0.6788
0.51161
0.040907
0.063907
0.97198
-0.59604
-0.42672
-0.47588
-0.62198
0.45106
-0.40072
-0.63735
-0.43675
0.16013
0.70846
-0.0054155
-0.54496
-0.065115
-0.65797
0.49657
-0.040319
-0.83558
0.075014
-0.14278
0.35145
-0.15451
0.54222
-0.23756
-0.69866
0.75242
-0.21601
0.84738
-0.19345
-0.50099
-0.49009
0.54471
0.45149
-0.67345
-0.33891
0.85996
0.44791
-0.29193
-0.61907
0.33897
-0.10674
-0.61443
0.38288
-0.58013
-0.55516
-0.09659
-0.2205
0.47362
0.57527
0.96865
-0.04014
-0.29947
0.18044
0.67385
-0.26892
0.30904
-0.53699
-0.066048
0.041336
-0.46371
0.42591
-0.1977
-0.57623
-0.45195
0.56125
-0.51998
-0.43834
-0.85701
-0.82941
0.1119
0.24858
0.66866
0.076657
0.96163
0.57551
-0.67956
0.60495
-0.83428
-0.4678
-0.59048
0.94602
0.39162
0.9584
0.84062
0.9021
0.2921
0.78067
0.98105
0.93391
0.96503
-0.38755
-0.0053767
0.55299
0.97805
0.76447
0.29778
0.95708
0.79585
0.95447
0.95077
0.40726
0.97955
0.90343
0.99
0.77609
-0.83644
0.97689
0.33309
0.97785
-0.58787
-0.60459
0.66801
-0.83719
-0.04118
-0.68478
-0.41111
-0.23032
-0.42513
0.19101
0.98557
-0.35746
-0.6693
-0.72492
0.50484
0.26849
0.11237
-0.26786
-0.70859
-0.79013
0.94026
0.43883
-0.55288
0.53644
-0.76245
0.92971
-0.36933
0.94283
0.7123
0.97755
-0.66332
-0.70036
-0.56409
-0.31911
-0.77561
-0.46186
0.56791
-0.8298
-0.041881
-0.86202
0.96245
-0.33919
0.88454
-0.35651
-0.67635
-0.31625
-0.85596
0.83965
-0.64076
0.32409
-0.1498
-0.85702
-0.70637
0.18404
0.36373
-0.17156
-0.53681
-0.2841
-0.67185
-0.70713
0.017494
-0.67813
0.51784
-0.32393
0.28387
-0.49285
0.97012
0.25635
0.32631
-0.37985
-0.33621
-0.70461
0.29489
0.60631
-0.41936
0.96861
-0.6312
0.95539
0.40684
0.21421
-0.78998
-0.57847
-0.59998
0.30091
-0.25418
0.98931
-0.3939
-0.22243
-0.77614
-0.68087
0.17011
0.27694
0.2972
-0.57079
0.07497
0.087588
-0.74505
-0.08736
-0.434
-0.52332
-0.24317
-0.72026
-0.60857
-0.64484
-0.55838
0.92459
0.90753
-0.28789
-0.30129
-0.29681
-0.19223
-0.29296
-0.19869
-0.37877
-0.21123
-0.20159
-0.37769
-0.32254
-0.54154
-0.37895
-0.58686
-0.29975
-0.5642
-0.56613
-0.59992
-0.089649
-0.53503
-0.52702
-0.47114
-0.51413
-0.61066
-0.042469
-0.55192
-0.11119
-0.087677
-0.42105
-0.55878
-0.54586
-0.52565
-0.46585
-0.30175
-0.52003
-0.38872
-0.5111
-0.57336
-0.54004
-0.57616
-0.5909
-0.51315
-0.48568
-0.5948
-0.43663
-0.40009
-0.53227
-0.47704
-0.39546
-0.6382
-0.33233
-0.51978
-0.62068
-0.012021
-0.45023
-0.58585
-0.51982
-0.39765
-0.44658
-0.34062
-0.5304
-0.55841
-0.4697
-0.54284
-0.54438
-0.45685
-0.49564
-0.32993
-0.62818
-0.46248
-0.5907
-0.5596
-0.55989
-0.47518
-0.61745
-0.46876
-0.5762
-0.1153
-0.38423
-0.3882
-0.032124
-0.62939
-0.53291
-0.56652
-0.60303
-0.47391
-0.52856
-0.53598
-0.60078
-0.51137
-0.65276
-0.58768
-0.51629
0.25423
-0.55605
-0.56453
-0.43954
-0.44921
-0.46771
-0.51241
-0.34047
-0.31142
-0.69111
-0.70003
-0.63087
-0.50148
-0.45887
-0.56433
-0.61954
-0.59804
-0.6634
-0.17528
-0.68459
-0.51964
-0.48588
-0.36442
0.23874
-0.52895
-0.70093
-0.34051
0.28047
-0.35411
-0.23751
-0.47954
-0.46723
-0.37699
-0.46493
-0.62142
-0.79822
-0.82678
-0.34085
-0.34951
-0.40127
-0.30557
-0.34713
-0.41049
-0.37034
-0.30025
-0.38097
-0.38151
-0.38608
-0.28269
-0.32343
-0.39262
-0.37324
-0.32767
-0.22389
-0.32995
-0.38315
-0.38529
-0.38485
-0.35012
-0.37986
-0.37247
-0.37897
-0.36649
-0.38539
-0.34205
-0.35653
-0.37477
-0.38198
-0.2054
-0.20857
-0.39581
-0.37956
-0.23313
-0.35514
-0.2081
-0.37718
-0.39234
-0.29034
-0.35587
-0.06563
-0.38154
-0.20491
-0.3975
-0.52847
-0.46068
0.87223
0.35909
-0.39115
0.048485
0.21699
-0.22468
-0.76057
-0.57202
0.27838
-0.26692
0.15873
-0.6141
-0.62621
-0.6075
-0.65437
-0.55199
-0.18726
-0.29374
-0.13563
0.78993
-0.41675
0.8118
-0.61978
-0.57803
0.88486
-0.54329
-0.74936
-0.64486
-0.54796
-0.63581
-0.4047
-0.35244
-0.29646
-0.30506
-0.30637
-0.36777
-0.1941
-0.48254
-0.47678
0.80832
0.93462
0.96961
0.67496
0.96476
0.96622
0.96378
0.77283
0.96405
0.97315
0.96226
-0.027876
0.39217
0.93902
0.87248
0.90964
0.88662
0.47228
0.35126
0.13239
-0.37398
-0.63216
-0.58898
0.76138
-0.59017
-0.69215
-0.68726
0.23274
-0.16248
-0.64007
-0.62396
-0.6768
-0.56558
-0.52043
-0.68741
-0.55527
-0.20087
-0.19875
-0.29514
-0.20655
-0.29272
-0.28701
-0.2997
-0.20374
-0.20129
-0.20268
-0.21104
-0.28796
-0.3009
-0.19883
-0.28799
-0.2004
-0.20296
-0.20647
-0.28708
-0.28901
-0.37113
-0.19587
-0.37758
-0.21181
-0.19739
-0.19841
-0.38698
-0.37736
-0.065745
-0.12452
-0.076319
-0.077544
-0.28969
-0.37498
-0.37495
-0.53079
-0.24064
-0.44402
-0.4985
-0.25621
-0.27861
-0.43569
-0.5046
-0.6439
-0.54656
-0.53116
-0.5435
-0.45571
-0.40276
-0.38521
-0.55289
-0.56245
-0.45508
-0.57603
-0.47346
-0.51047
-0.46883
-0.55378
-0.29579
-0.39759
-0.50075
-0.52473
-0.6993
-0.52825
-0.17076
-0.66838
-0.85564
-0.87342
-0.72243
-0.59914
-0.76148
-0.84013
-0.81888
-0.79109
-0.85369
-0.74939
-0.82708
-0.38763
-0.83268
-0.88822
-0.82831
-0.78779
-0.79257
-0.87103
-0.83633
-0.78194
-0.7329
-0.27325
-0.77621
-0.88406
-0.49008
-0.1985
-0.19986
-0.16364
-0.17186
-0.20791
-0.19349
0.94765
0.2798
0.9334
-0.33923
-0.37283
-0.19658
-0.19718
-0.40201
-0.38065
-0.34684
-0.38731
-0.63012
-0.55135
-0.44574
0.73688
-0.59853
0.92669
0.93847
0.52026
0.78547
0.86664
0.16255
-0.34324
0.93344
0.96755
0.95204
0.93121
-0.29038
0.24212
0.99297
0.36381
0.15517
-0.01759
0.89081
-0.11488
-0.2838
0.20336
0.9747
0.005867
0.94
0.42537
0.84016
-0.26681
0.40638
-0.077354
-0.19431
-0.85062
-0.2596
-0.69256
-0.43583
0.56972
0.93724
0.41502
-0.42165
0.86397
-0.64468
-0.40944
-0.099113
0.92136
0.84006
0.89424
0.93406
0.79436
-0.88034
-0.88518
-0.95764
0.39405
-0.96731
0.969
0.93937
0.82449
0.92207
0.97304
-0.91462
0.88662
-0.34625
0.8329
0.45426
0.90862
-0.299
-0.813
-0.78648
-0.35723
-0.063783
0.36886
-0.38647
-0.46701
-0.29973
-0.2086
-0.35604
-0.336
-0.31024
-0.28911
-0.47074
-0.49505
-0.071611
0.0096193
-0.48064
-0.48412
-0.29592
-0.51439
0.94285
0.95553
0.81381
-0.43828
-0.44609
0.90134
0.96377
0.90332
0.99054
0.63967
-0.66588
-0.23581
-0.28732
0.95958
-0.47808
0.096107
0.97258
0.97779
0.8283
0.98682
-0.62209
-0.74194
-0.49044
-0.78642
-0.19526
-0.29489
-0.29001
-0.35943
-0.37105
-0.21161
-0.29627
-0.36188
-0.10705
-0.40096
-0.31568
-0.28619
-0.18458
-0.30419
-0.38566
-0.19231
-0.3705
-0.23326
-0.40784
-0.43128
-0.2913
-0.46019
-0.36996
-0.29357
-0.39469
-0.36965
-0.30279
-0.46181
-0.52722
-0.28859
-0.45545
-0.37507
-0.31029
-0.20584
-0.20772
-0.28621
-0.72087
-0.29506
-0.63874
-0.63266
-0.53849
-0.69329
-0.64711
-0.64096
-0.70544
-0.54054
-0.6808
-0.38175
-0.53216
-0.74194
-0.48506
-0.30676
-0.20229
-0.31146
-0.29539
-0.20931
-0.2119
-0.3623
-0.46843
-0.44791
-0.42653
-0.22204
-0.0094107
0.093364
-0.27074
-0.38671
-0.46886
-0.45917
-0.54235
-0.45118
-0.54309
-0.47332
-0.31807
-0.52279
-0.54766
-0.4611
-0.25027
-0.53629
-0.23829
-0.41679
-0.46429
-0.23855
-0.32166
-0.39263
-0.31558
-0.51854
-0.42333
-0.45161
-0.44469
-0.52945
-0.53531
-0.39434
-0.31992
-0.41163
-0.25671
-0.50306
-0.24236
-0.45884
-0.46486
-0.42805
-0.50626
-0.065223
-0.52023
-0.55409
-0.47997
-0.52854
-0.47649
-0.24763
-0.421
-0.53045
-0.24769
-0.48507
-0.40716
-0.3167
-0.51491
-0.52886
-0.25146
-0.23895
-0.31845
-0.51146
-0.25181
-0.34224
-0.38485
-0.35925
-0.23428
-0.24988
-0.46066
-0.40983
-0.51022
-0.4522
-0.41362
-0.55308
-0.40178
-0.50223
-0.32508
-0.45604
-0.31681
-0.46627
-0.53088
-0.47385
-0.24823
-0.52453
-0.31895
-0.34402
-0.55208
-0.20202
-0.1979
-0.21075
-0.39426
-0.34096
-0.28611
-0.37146
-0.20276
-0.37367
-0.17674
-0.28249
-0.42938
-0.29976
-0.58159
-0.29785
0.025284
-0.59923
-0.47974
-0.59793
-0.16645
-0.39485
0.026477
-0.18366
-0.45472
-0.31252
-0.29226
-0.28398
-0.46184
-0.51397
-0.42388
0.068694
0.30762
-0.46487
-0.48645
-0.52335
-0.39488
-0.44071
-0.20604
-0.20206
-0.20538
-0.39254
-0.40326
-0.09873
-0.34848
-0.38307
-0.29408
-0.37333
-0.21097
-0.30549
-0.20604
-0.20538
-0.49162
-0.33753
-0.17607
-0.45365
-0.59944
-0.5313
-0.45535
-0.45973
-0.64416
-0.48446
-0.3962
0.72706
0.96975
0.9563
0.98281
-0.31509
0.43301
-0.23821
0.92105
-0.24255
0.89355
-0.76234
-0.60411
-0.58334
-0.59812
-0.67078
-0.70254
-0.53824
-0.74295
-0.58804
-0.70586
-0.86414
0.76413
0.71052
0.93089
0.14643
0.34881
-0.82023
0.89297
-0.87908
-0.91251
0.25166
0.99237
0.97226
0.95996
0.93836
[truncated: 296,572+ more rows]
