# Supplementary material for: Full assembly of HIV-1 particles requires assistance of the membrane curvature factor IRSp53
Source: eLife. 2021 Jun 11;10:e67321. doi: 10.7554/eLife.67321 (PMC8260224; doi:10.7554/eLife.67321)
Supplement: Figure 3—source data 2. [file elife-67321-fig3-data2.xlsx]

## Sheet: irtks
-0.206
-0.53058
0.88723
0.11981
-0.49731
0.037792
0.89484
-0.19993
-0.5574
-0.19564
-0.28895
-0.29402
0.34092
0.40855
-0.3441
-0.33784
0.13853
-0.48665
-0.45779
-0.30867
-0.48876
-0.49833
-0.38528
-0.10686
-0.52406
-0.43825
-0.30655
-0.45679
-0.26185
-0.023061
0.0097486
-0.46921
-0.45877
-0.38763
-0.29126
-0.4256
-0.377
-0.38901
-0.37024
0.0090855
-0.41125
0.032345
-0.40842
-0.29709
-0.49713
-0.41183
-0.47211
-0.37063
-0.48963
-0.36557
-0.44858
-0.24464
-0.30141
-0.38725
-0.51668
-0.51755
-0.46588
-0.43573
-0.471
-0.38474
0.79018
-0.26539
-0.41266
-0.29631
-0.30567
-0.4995
-0.18824
-0.46246
-0.39158
-0.27202
-0.38015
-0.22566
-0.44305
0.081623
-0.018531
-0.40134
-0.38404
-0.44167
-0.27699
-0.46431
-0.52237
-0.21508
-0.0093772
-0.032137
-0.37451
-0.50076
-0.42487
-0.46051
-0.51791
0.009233
-0.40849
-0.38768
-0.43658
-0.24469
-0.361
-0.42086
-0.21434
-0.45876
-0.098555
-0.26338
-0.41949
-0.38061
-0.44219
-0.39341
-0.43701
-0.45011
-0.37743
-0.46792
-0.22059
-0.21805
-0.38527
-0.47136
-0.47637
-0.44887
-0.39321
-0.0093498
-0.44464
-0.39043
-0.46002
-0.46729
-0.44199
-0.49984
-0.39466
-0.44384
-0.4683
-0.47017
-0.38862
-0.39583
-0.39108
-0.48651
-0.37741
-0.39639
-0.31284
-0.29447
-0.49734
-0.031843
-0.37217
-0.40606
-0.49766
-0.43715
-0.45752
-0.41765
-0.30537
-0.20924
-0.29657
-0.37135
-0.37054
-0.30083
-0.38289
-0.37994
-0.43667
-0.19931
-0.3833
-0.20501
-0.20941
-0.4272
-0.4687
-0.4209
-0.20215
-0.20576
-0.37845
-0.19857
-0.39386
-0.30849
-0.42546
-0.43364
-0.40167
-0.20221
-0.28538
-0.28746
0.089412
-0.21214
-0.49608
-0.28675
-0.29438
-0.43612
-0.68774
-0.3082
-0.42702
-0.28637
-0.50974
-0.37842
-0.4681
-0.39511
-0.38585
-0.1358
-0.52738
-0.37434
-0.090415
-0.39168
-0.39131
-0.4463
-0.20597
-0.4936
-0.16102
-0.29354
-0.20566
-0.19906
-0.20381
-0.49417
-0.36926
-0.34051
-0.53849
-0.41731
-0.19309
-0.34238
-0.20352
-0.28814
-0.20807
-0.20368
-0.20143
-0.29326
0.24373
-0.47995
-0.44546
-0.28704
-0.27939
-0.21123
-0.34714
-0.37421
-0.3673
-0.293
-0.30213
-0.19624
-0.29596
-0.20015
-0.36746
-0.20211
-0.21002
-0.29996
-0.3132
-0.4428
-0.007465
-0.2974
-0.30591
-0.3282
0.60256
-0.63827
-0.60637
-0.53531
-0.56536
-0.49847
-0.25138
0.76762
0.35781
-0.5448
0.82941
-0.048284
-0.20591
-0.30732
-0.4961
-0.29155
-0.46809
-0.36718
-0.52283
-0.21228
-0.54902
-0.39696
-0.39678
-0.20774
-0.38663
-0.011326
-0.21062
-0.20982
-0.36792
-0.53042
-0.38933
-0.37044
-0.50101
-0.20058
-0.2871
-0.44976
-0.47102
-0.39523
-0.30361
-0.20039
-0.46799
-0.28832
-0.20433
-0.29405
-0.5818
-0.30694
-0.30924
0.14225
-0.20685
-0.30591
-0.19724
-0.21173
-0.28544
-0.20381
-0.37698
-0.30697
-0.29821
-0.39553
-0.53162
-0.52266
-0.63043
-0.25251
-0.46235
-0.6321
-0.72722
-0.53702
-0.68092
-0.59878
-0.61103
-0.63001
0.92315
0.91876
0.33444
0.019633
0.39681
-0.048885
0.93027
0.019741
-0.07216
0.34549
0.39408
0.38623
0.97112
0.39134
0.33952
0.99076
0.87939
0.56168
0.035903
0.019093
-0.30287
0.37025
-0.52534
-0.39319
-0.51869
-0.31103
-0.43697
-0.47193
-0.37237
-0.3964
-0.52155
-0.66941
-0.33073
-0.066779
-0.67519
-0.58221
-0.67564
-0.47743
-0.44346
-0.50503
-0.37441
-0.30277
-0.39987
-0.31453
-0.53087
-0.38858
-0.3858
-0.55626
-0.52256
-0.54598
-0.51857
-0.5861
-0.26937
-0.57984
-0.58691
-0.5285
-0.49308
-0.62261
-0.51729
-0.45566
-0.048751
-0.37302
-0.53763
-0.44895
-0.51845
-0.58778
-0.57435
-0.12347
-0.55557
-0.38705
-0.24445
-0.56043
-0.44526
-0.58773
-0.53525
-0.57354
-0.39639
-0.4998
-0.66817
-0.44094
0.28867
-0.41185
-0.33244
-0.5296
-0.73863
-0.15145
-0.87937
-0.68997
-0.74797
0.93223
-0.3517
-0.74934
-0.39363
-0.80202
-0.78459
-0.79306
-0.083251
-0.76519
-0.4032
-0.75819
0.72849
-0.78383
-0.70429
-0.3636
0.27514
-0.72393
-0.34216
0.95856
0.76792
0.57945
0.68619
-0.45845
0.5054
-0.36637
-0.6153
0.83609
0.23373
0.58907
0.89918
-0.51093
-0.71199
0.68209
0.42097
-0.81812
0.25864
-0.5742
-0.19927
0.96038
-0.81236
-0.40158
0.87625
-0.47281
-0.65016
-0.703
-0.79974
-0.35311
-0.77553
0.027125
-0.85257
-0.8168
-0.73158
0.83469
-0.86848
-0.50534
-0.82679
-0.76863
-0.78519
-0.69336
-0.70235
-0.6983
-0.77993
-0.57661
-0.70671
-0.85574
-0.017012
-0.082729
-0.76365
-0.2621
0.16651
-0.78297
-0.696
-0.81374
-0.18171
-0.68515
-0.84264
-0.77457
-0.69404
-0.73129
-0.60997
-0.79813
-0.79642
-0.33186
0.57159
-0.77074
-0.71115
-0.77948
-0.70205
-0.35571
-0.32414
-0.58572
-0.71525
-0.75651
-0.85984
-0.77393
-0.6298
0.33429
-0.039192
-0.70987
-0.7093
-0.18629
-0.78413
-0.68585
-0.7831
-0.72554
-0.80867
-0.8506
-0.69253
-0.34151
0.84214
-0.66116
0.040997
-0.80462
-0.49569
0.63339
-0.71954
0.89655
0.35607
-0.64174
-0.7823
-0.063128
-0.52309
0.5881
0.081452
-0.79233
-0.039049
-0.70007
-0.72024
-0.78178
-0.75569
-0.074882
0.57623
-0.064667
0.68127
-0.73768
0.4058
0.28709
-0.6193
0.90764
-0.7151
0.30297
-0.78111
0.92455
-0.68464
-0.66011
-0.78775
-0.76734
-0.87274
-0.75917
0.99433
-0.62826
-0.60963
-0.74596
-0.79286
-0.80627
-0.33806
-0.76134
0.3258
-0.84859
-0.62225
-0.72671
-0.74622
-0.69192
-0.7641
-0.22038
-0.68778
-0.27538
-0.71485
0.44403
0.77531
-0.029254
-0.34809
-0.33818
-0.74501
-0.037605
-0.80131
-0.73194
-0.59073
-0.68171
-0.36377
-0.47075
-0.78531
0.005558
-0.7659
-0.64664
-0.80076
-0.84842
0.86018
-0.82205
-0.22079
0.2739
0.84854
0.54004
-0.78322
0.72642
0.3385
-0.62442
-0.5378
0.56918
-0.85651
0.25242
-0.78632
-0.74015
-0.34206
0.47406
0.13454
0.29001
0.89935
0.49903
0.23986
0.58585
-0.58143
0.75983
0.9523
0.36403
-0.78923
-0.76539
-0.14018
0.95038
0.62814
-0.63025
0.4456
-0.093899
0.57721
0.83265
-0.77415
-0.74498
0.67925
0.97456
0.36099
0.65425
-0.07382
0.45661
-0.076277
0.97865
0.72527
-0.70005
0.87784
-0.088108
-0.77161
0.26328
0.14435
0.94077
0.58524
-0.75836
0.78367
0.51404
-0.75558
0.83502
-0.76909
-0.66954
0.88436
0.69124
-0.21893
0.25556
-0.29249
0.46905
0.78158
-0.2513
-0.34378
0.46977
0.71977
0.91021
0.87953
0.68994
-0.38975
-0.36811
-0.80424
-0.2855
-0.039271
-0.18762
-0.7996
-0.6903
0.72229
0.81562
-0.754
0.91503
0.84939
0.97221
0.28483
-0.16159
0.62328
-0.78927
-0.10613
-0.68649
-0.42904
0.74634
-0.38449
-0.25177
0.24568
0.94545
0.41127
0.93918
0.93753
0.62769
0.30675
0.50621
0.2869
0.97117
0.34413
0.30818
-0.21696
0.52261
0.90244
-0.21006
-0.36327
-0.2817
-0.32454
0.73818
-0.038485
0.99073
0.97126
0.92912
0.9353
0.48194
-0.18175
0.93373
-0.33943
0.27764
0.95595
0.27836
-0.22413
0.064929
0.27809
0.5889
0.89439
0.94842
0.45916
0.92996
0.73975
0.57736
0.25151
0.30118
0.95355
0.18795
0.31296
0.35936
0.29112
-0.2055
0.90032
0.86381
0.58391
-0.43923
-0.46287
-0.45413
-0.5291
-0.31072
-0.29603
-0.37297
-0.52581
-0.53151
-0.55609
-0.54541
0.1055
-0.32679
-0.47424
-0.38763
-0.47537
0.077648
-0.30043
-0.53732
-0.48696
-0.49731
-0.48986
-0.4197
-0.45417
0.19811
-0.27958
-0.19607
-0.48286
-0.21129
-0.2017
-0.29375
-0.28249
-0.36838
-0.45485
-0.16532
-0.47351
-0.30361
-0.36227
-0.48992
-0.31222
-0.54831
0.16131
-0.50863
-0.38051
-0.45192
-0.30133
-0.3077
-0.5138
-0.28832
-0.19385
-0.4236
-0.36304
-0.41998
-0.3698
-0.2941
-0.20251
-0.39348
-0.37142
-0.35144
-0.44718
-0.45431
-0.52149
-0.23973
-0.28508
-0.42616
-0.44006
-0.30167
-0.45357
-0.36852
-0.35933
-0.44838
-0.53137
-0.1531
0.3657
-0.27463
-0.58265
-0.24457
0.87644
-0.47483
0.86005
-0.30652
0.908
-0.44243
-0.5803
-0.55026
-0.58445
0.35727
0.90783
-0.55312
0.51028
-0.34132
0.35161
-0.25695
-0.4032
-0.46819
-0.50056
-0.29723
-0.52923
-0.57972
-0.60943
-0.47484
-0.55981
-0.4621
-0.39357
-0.4744
-0.44764
-0.52885
-0.50968
-0.45559
-0.43322
-0.62891
-0.33792
-0.61791
-0.39042
-0.43334
-0.30821
-0.47488
-0.55283
-0.62186
-0.21015
-0.53522
-0.31478
-0.60885
-0.54122
-0.48219
-0.44897
-0.56926
-0.54844
-0.39316
-0.61507
-0.54322
-0.54409
-0.45416
0.36628
0.8742
-0.50233
-0.46849
-0.50851
0.27984
-0.44947
-0.30631
-0.46777
-0.40018
-0.17117
-0.4752
-0.43739
-0.60087
-0.47847
-0.63031
-0.39256
-0.46857
-0.44602
-0.47692
-0.27822
-0.59809
-0.54018
-0.44469
-0.26608
-0.54424
-0.53322
-0.51929
-0.45198
-0.56385
-0.45267
-0.4687
-0.55623
-0.40131
-0.54415
-0.51926
-0.57622
-0.47617
0.50004
0.29674
-0.56403
-0.44875
-0.5733
-0.46054
-0.40101
-0.44931
0.42237
-0.45411
-0.53841
-0.61026
-0.47587
-0.44737
0.044904
-0.45685
0.32725
-0.24918
0.92672
0.28797
0.92478
0.87712
-0.37024
-0.53856
-0.45596
-0.39255
-0.59229
-0.26924
-0.1126
-0.28423
-0.46014
-0.018111
-0.57963
-0.47518
-0.53929
-0.45818
-0.5367
-0.53684
-0.05478
-0.5321
0.36385
0.23838
-0.44891
-0.54639
-0.6213
-0.6221
0.3409
0.31331
-0.15891
-0.5315
-0.48099
-0.55001
-0.53655
-0.56091
-0.36912
-0.52254
-0.52344
-0.47031
-0.29651
-0.17206
-0.44908
-0.56425
-0.56581
0.31031
-0.53489
-0.53203
-0.46046
-0.6226
-0.57695
-0.55714
-0.51926
-0.54795
0.26531
-0.59936
-0.58644
-0.24398
-0.45052
-0.52833
-0.54214
-0.47084
-0.51047
-0.53004
-0.43425
-0.44156
-0.63649
-0.56332
-0.52489
-0.39722
-0.52931
-0.47624
-0.39527
-0.55029
-0.40235
-0.51334
-0.53423
-0.39528
-0.48402
-0.58065
-0.37295
-0.47517
-0.60473
-0.51975
0.90393
-0.4825
0.076983
-0.40344
-0.59935
-0.54594
-0.47767
-0.45392
-0.52963
-0.45523
-0.45233
-0.56839
-0.46835
-0.58249
-0.54935
0.29526
-0.57033
-0.51998
-0.48784
-0.11845
-0.50107
0.31388
-0.58841
-0.31189
-0.31681
-0.58281
-0.50984
-0.61437
-0.52507
-0.54191
-0.63233
-0.44364
-0.42608
-0.45234
-0.11782
-0.58759
-0.46776
-0.60314
-0.036897
-0.47192
-0.53437
-0.45636
-0.60673
0.39517
-0.5273
-0.26944
-0.52155
0.42701
-0.39847
-0.56754
0.30908
-0.62593
-0.44143
-0.47057
-0.46935
0.33511
0.33822
0.33068
0.3102
-0.056135
0.5209
-0.54411
0.9179
-0.60473
-0.5611
0.32652
-0.42996
0.33255
-0.31523
-0.53812
-0.45834
-0.52831
-0.45316
-0.5463
-0.62424
0.35293
0.23487
0.90724
-0.40483
0.31175
0.88976
-0.33941
-0.45677
0.24093
-0.39782
-0.47781
-0.63218
-0.57578
-0.32106
-0.31831
0.35578
0.83303
-0.23807
-0.11201
-0.46589
0.8915
-0.56783
-0.5822
0.89492
-0.019035
0.88848
-0.32097
0.81986
-0.45594
-0.5449
-0.2458
-0.3512
-0.29803
-0.32547
0.33995
-0.40079
-0.23626
-0.47152
-0.55209
-0.31154
0.31322
-0.60586
-0.58966
-0.57538
-0.55131
-0.466
-0.5969
-0.55273
-0.47527
-0.40037
-0.45118
-0.54098
-0.52415
-0.38665
-0.60952
-0.5357
-0.54237
-0.61411
-0.52176
-0.55311
0.94751
0.41955
-0.31231
-0.028346
0.92326
-0.12544
-0.37206
0.89453
-0.019319
-0.10848
-0.11741
0.30084
0.21823
-0.62347
0.043184
-0.43224
-0.40673
0.87384
0.29436
-0.26043
-0.37257
-0.12638
-0.5575
-0.23942
-0.46374
0.32114
-0.40487
-0.38801
-0.29159
-0.388
0.91912
-0.50059
-0.15439
-0.26683
-0.40046
-0.31851
-0.22873
-0.088604
0.88517
0.87799
-0.46283
0.79751
-0.42855
-0.37471
-0.63662
-0.61222
0.34125
-0.49825
-0.47384
-0.2127
-0.059279
0.91459
-0.20074
0.074227
-0.58238
-0.057647
-0.5062
-0.36735
0.32388
-0.59783
0.014043
0.89804
-0.58452
-0.11487
-0.6055
-0.31577
-0.57032
-0.57873
-0.53381
-0.57964
0.86922
-0.047474
-0.13389
-0.59252
0.2886
0.88148
0.92664
-0.47792
-0.31422
0.31684
0.50039
-0.42439
-0.26719
-0.63
0.27691
0.90247
0.85756
-0.45944
-0.088537
0.33876
-0.24148
-0.38913
-0.56797
0.86487
0.41871
0.29636
-0.18291
0.90655
0.85722
0.86412
0.32764
-0.58551
-0.53055
0.39353
-0.52891
-0.34034
-0.058791
-0.58782
-0.30144
0.5093
-0.23629
-0.31393
0.35471
-0.5277
-0.52817
-0.26385
-0.61265
0.34425
-0.21029
-0.29977
-0.57978
0.36462
0.4304
-0.30358
0.25077
0.87371
-0.30055
-0.26251
-0.57537
-0.46921
-0.36415
-0.40308
0.34286
-0.2153
-0.11876
-0.51329
-0.59695
-0.18918
-0.59119
0.35639
0.51144
-0.58223
-0.54751
-0.41988
-0.453
0.23481
-0.54079
-0.12577
-0.55115
-0.44294
-0.037288
-0.45958
0.29924
-0.19685
-0.39443
-0.52284
-0.54817
-0.50882
-0.4559
-0.46174
-0.037452
0.84978
0.2757
-0.45605
-0.54808
-0.45163
-0.56915
-0.43591
0.84119
-0.63229
0
-0.59001
-0.63696
-0.30354
-0.54966
-0.54672
-0.4573
-0.51706
-0.31725
-0.604
0.298
-0.59945
-0.4032
-0.31093
-0.40329
-0.54517
0.32939
-0.56667
-0.45467
-0.45293
-0.5279
-0.037485
0.41004
-0.48367
-0.53589
-0.40287
-0.58207
0.34124
-0.60301
-0.32736
-0.45963
-0.51056
-0.5166
-0.45013
-0.52579
-0.53431
-0.51098
0.17465
-0.62471
-0.50873
-0.54999
0.32836
-0.44606
-0.3561
0.28329
-0.39882
-0.11376
-0.48825
-0.50619
-0.1402
-0.59601
-0.45446
0.88201
-0.62514
-0.43235
-0.54196
-0.50799
-0.55906
-0.05539
0.35542
0.86556
-0.36282
-0.46271
-0.21403
-0.38779
-0.46756
0.35289
-0.6229
-0.52719
-0.36854
-0.47514
-0.44957
-0.17625
-0.55466
-0.47369
-0.5244
-0.5546
-0.17224
-0.098481
-0.3586
-0.55227
-0.53296
-0.48357
-0.53083
-0.47495
-0.57669
-0.52005
-0.5937
-0.43665
-0.52495
-0.50958
-0.50114
-0.39861
-0.26656
-0.22092
-0.5323
-0.60741
0.84866
-0.33294
-0.11707
-0.47134
0.83409
-0.078431
-0.1901
0.323
-0.46867
-0.057625
-0.55044
-0.61534
-0.29384
-0.11328
-0.36975
-0.27159
-0.38856
-0.22978
0.23804
-0.63033
-0.59843
0.33093
-0.53867
-0.51383
-0.43253
-0.4306
-0.60474
-0.12775
-0.48263
0.10393
-0.47074
-0.1979
-0.53187
0.043319
-0.509
-0.51976
-0.62372
-0.60171
-0.46417
0.90072
-0.61944
-0.54578
-0.52047
-0.5504
-0.15752
-0.47201
-0.51944
-0.43316
0.29323
-0.39696
-0.3164
0.35676
-0.6325
0.3106
-0.53456
-0.11207
-0.46727
0.32851
-0.56515
-0.62223
-0.50888
-0.34955
-0.14667
0.8634
-0.33089
-0.18262
-0.42184
0.62288
-0.39925
-0.51974
0.87818
-0.53566
-0.35857
-0.40559
-0.52255
-0.49289
-0.58804
0.35207
-0.53909
-0.10202
-0.30292
-0.10926
-0.44624
-0.56464
-0.54239
-0.44785
-0.22914
-0.53139
-0.49989
-0.41403
-0.53491
-0.46901
-0.35577
-0.2505
0.8188
-0.15109
-0.38551
-0.54559
-0.6123
-0.61343
0.84365
-0.58949
-0.55193
-0.62913
-0.50318
-0.46297
-0.50082
-0.59034
-0.36822
-0.51393
-0.49885
-0.32974
0.043061
0.92922
-0.51825
-0.30042
-0.41473
-0.26734
-0.25524
-0.03745
-0.0294
-0.50083
-0.51013
-0.41993
0.23182
-0.55572
-0.21942
-0.33591
-0.21322
-0.52639
-0.47737
-0.17587
-0.46146
-0.58697
-0.38819
-0.53603
-0.018877
0.81599
-0.60063
0.2269
-0.44436
-0.53465
-0.61317
-0.52702
-0.2552
-0.395
-0.38411
-0.5243
-0.43425
-0.37473
-0.51747
-0.4576
-0.47386
0.88555
-0.33889
-0.46656
-0.25875
0.022996
-0.52169
-0.16119
-0.57254
-0.59701
-0.57066
-0.58919
-0.47373
-0.086871
-0.37351
-0.57168
-0.31212
-0.33595
0.037676
-0.75651
-0.80406
-0.66973
-0.75158
-0.70559
-0.6924
-0.69976
-0.69004
-0.74146
-0.62896
-0.68771
-0.73488
-0.56899
-0.75295
-0.71737
-0.67647
-0.26591
-0.72781
-0.22374
-0.7386
-0.71511
-0.7364
-0.30642
-0.4764
-0.45103
-0.46303
-0.47263
-0.38897
-0.45344
-0.40458
-0.44085
-0.70334
-0.70778
-0.52153
-0.82392
-0.7689
-0.24227
0.16423
-0.78775
-0.69417
-0.02764
-0.34033
-0.49087
-0.46017
0.34294
-0.26006
-0.13734
-0.73776
-0.74117
-0.53761
-0.37405
-0.44484
-0.65792
-0.83291
-0.15093
-0.53046
-0.83045
-0.46813
-0.0048968
0.71634
-0.21307
-0.40133
-0.28868
-0.56749
-0.31971
-0.023388
-0.58647
-0.61582
-0.30733
-0.47886
-0.70195
0.015795
-0.31693
-0.40882
-0.77333
0.62306
0.049134
-0.32271
0.016658
-0.54124
-0.7014
0.95217
0.98269
0.57372
-0.11899
0.91813
0.89783
0.72675
0.79282
0.98015
0.94762
-0.43633
0.9295
0.96299
0.95477
0.97597
0.96731
0.91552
-0.6155
0.88042
-0.61815
0.93193
0.94581
-0.47288
0.28644
-0.62277
-0.5535
-0.46327
-0.24282
0.80112
-0.66842
-0.30744
0.62302
0.90244
-0.35995
-0.6968
0.94591
0.7573
0.96282
0.39652
0.38191
0.60618
0.70794
-0.57057
-0.48293
-0.076114
0.12153
0.71515
-0.41231
0.44835
0.93548
-0.64641
-0.37666
0.52149
-0.55119
-0.67885
0.26045
-0.68296
-0.47691
0.65741
-0.55239
0.14063
0.91745
0.92128
0.63712
0.94266
-0.21762
0.33584
-0.37438
0.92529
0.94523
-0.32577
0.90966
0.76548
-0.63343
0.53407
0.71676
-0.52017
0.92805
-0.077285
-0.20847
-0.65281
-0.65422
0.97245
0.93329
0.92801
0.45607
-0.51022
0.77268
-0.58278
-0.40312
0.95116
-0.56783
0.91839
0.94499
-0.52622
-0.67985
-0.24179
-0.31713
-0.1743
-0.36459
0.91375
-0.56455
0.97654
0.7447
0.9169
0.35508
0.91426
-0.32452
0.80523
-0.51785
0.96296
0.9041
0.91049
0.78821
0.97098
0.89305
0.42307
0.92066
0.39919
-0.18946
-0.3995
-0.2128
-0.37112
0.34204
0.91929
-0.034398
0.37427
-0.2175
-0.22069
0.019336
0.0094463
0.92643
-0.19428
0.35451
0.8335
0.48524
0.76931
-0.15518
0.0097491
0.47665
0.0093616
0.96697
0.0092589
0.37297
-0.03257
0.37961
0.94792
-0.21237
0.0092557
0.71953
0.3363
0.87151
-0.032907
-0.30145
-0.023717
0.85459
0.47817
-0.023802
-0.37389
-0.22087
-0.24508
-0.023219
-0.024169
0.084034
0.97561
0.96122
0.37935
0.87495
-0.023261
0.0093654
0.40881
-0.032128
0.89788
-0.21828
0.37887
-0.090029
-0.031737
0.90234
0.50036
0.8938
0.90941
0.55698
0.32546
0.67046
0.40173
0.38483
0.46264
0.3761
0.3733
0.33555
-0.22675
0.14199
-0.036873
-0.26389
0.92246
-0.71821
-0.46476
0.36589
-0.20935
0.66999
-0.073286
0.32224
0.80104
-0.32789
-0.13717
0.18789
0.90442
0.94982
-0.15933
0.94191
0.90356
0.93275
-0.39928
-0.34831
-0.37215
-0.40601
-0.30405
-0.36906
-0.35275
-0.38923
-0.28623
-0.20089
-0.20298
-0.37881
-0.34521
-0.39438
-0.29698
-0.38312
-0.38397
-0.38602
-0.34912
-0.30471
-0.38738
-0.38818
-0.20483
-0.20014
-0.20637
-0.40302
-0.35463
-0.3054
-0.40126
-0.38517
-0.35095
-0.35652
-0.35901
-0.34701
-0.37483
-0.3359
-0.3926
-0.29418
-0.20566
-0.36633
-0.20486
-0.36484
-0.38113
-0.3749
-0.40944
-0.34394
-0.21158
-0.21125
-0.36941
-0.20432
-0.32599
-0.19928
-0.3897
-0.38705
-0.38269
-0.39279
-0.21137
-0.39344
-0.37128
-0.3978
-0.19723
-0.13939
-0.35499
-0.35092
-0.4117
-0.36944
-0.39344
-0.20569
-0.30108
-0.40933
-0.34479
-0.28818
-0.30486
-0.19453
-0.39821
-0.34482
-0.4034
-0.35592
-0.2939
-0.29008
-0.34014
-0.40925
0.056988
-0.34446
0.050017
-0.012357
-0.36378
-0.2064
-0.37216
-0.37355
-0.37011
-0.20133
-0.34336
-0.38623
-0.20103
-0.38176
-0.36279
-0.35245
-0.35333
-0.38285
-0.29445
-0.20391
0.035803
0.9577
-0.5991
0.87285
-0.5411
0.89647
0.87855
0.90868
0.93099
-0.5877
-0.59465
0.5888
0.035082
-0.55558
-0.48194
-0.5964
0.4995
-0.62035
0.03562
-0.43716
-0.52818
-0.21554
[truncated: 86,281 more rows]
