# Supplementary material for: Full assembly of HIV-1 particles requires assistance of the membrane curvature factor IRSp53
Source: eLife. 2021 Jun 11;10:e67321. doi: 10.7554/eLife.67321 (PMC8260224; doi:10.7554/eLife.67321)
Supplement: Figure 3—source data 3. [file elife-67321-fig3-data3.xlsx]

## Sheet: IRSP53
Index	Size	# locs	Major axis	Minor axis
1	184.558	537	225.369	143.746
2	128.071	263	149.91	106.231
3	170.187	628	199.327	141.047
4	185.836	773	261.346	110.327
5	165.521	666	210.725	120.316
6	132.486	379	159.476	105.496
7	90.6581	120	96.4147	84.9016
8	130.043	422	165.022	95.0631
9	120.522	249	132.859	108.184
10	229.646	1097	302.935	156.357
11	301.152	3701	369.717	232.587
12	90.1022	112	110.509	69.695
13	110.677	145	124.464	96.8902
14	273.868	1070	379.864	167.872
15	97.2949	167	104.119	90.4711
16	139.297	451	162.537	116.058
17	97.8418	130	125.337	70.3461
18	69.4315	76	83.2432	55.6198
19	153.64	338	178.909	128.372
20	134.754	225	178.631	90.8774
21	87.6783	130	102.068	73.2883
22	92.7666	99	99.2052	86.3279
23	115.823	298	137.941	93.706
24	83.472	92	83.5503	83.3936
25	115.35	221	152.133	78.5679
26	396.503	1374	616.189	176.818
27	139.775	405	182.573	96.9766
28	397.631	2072	467.094	328.167
29	88.9397	123	90.74	87.1393
30	126.857	438	171.853	81.8611
31	99.7046	190	100.378	99.0309
32	117.293	171	134.735	99.8517
33	88.7447	128	99.6241	77.8653
34	90.5416	196	102.121	78.9621
35	64.6644	107	81.4465	47.8824
36	134.794	267	173.369	96.219
37	82.1844	99	89.8098	74.559
38	227.129	1608	259.708	194.549
39	100.955	153	120.611	81.2993
40	223.119	11659	275.477	170.761
41	109.333	312	123.052	95.6144
42	138.608	399	149.884	127.332
43	115.175	291	115.279	115.07
44	84.5459	83	89.7877	79.3041
45	168.768	558	232.899	104.637
46	61.0983	56	63.8088	58.3879
47	106.895	125	117.778	96.0109
48	90.5627	231	106.067	75.058
49	88.5608	149	98.6109	78.5107
50	117.585	183	134.227	100.943
51	124.193	237	187.947	60.4385
52	299.974	1095	389.967	209.981
53	102.778	261	108.172	97.3832
54	92.1876	150	102.82	81.555
55	94.3271	110	96.0025	92.6517
56	479.282	4600	714.27	244.294
57	135.544	323	159.698	111.39
58	106.195	128	107.267	105.123
59	169.739	673	198.032	141.446
60	391.915	2754	468.585	315.246
61	95.8577	183	105.745	85.9703
62	85.5303	95	101.406	69.6541
63	80.4507	92	96.7242	64.1772
64	133.04	273	156.478	109.602
65	95.4287	369	109.368	81.4889
66	136.217	326	164.457	107.976
67	105.18	131	131.019	79.3417
68	108.597	139	113.418	103.776
69	199.803	437	204.648	194.959
70	295.71	1027	426.96	164.46
71	87.052	101	100.446	73.6579
72	129.7	194	143.485	115.914
73	144.371	387	169.57	119.171
74	90.9931	105	99.2789	82.7074
75	137.669	670	178.672	96.6655
76	212.681	975	258.31	167.052
77	86.4599	132	95.395	77.5247
78	149.723	413	192.634	106.812
79	343.135	1918	418.079	268.191
80	114.102	165	115.896	112.309
81	90.8868	104	97.2652	84.5084
82	118.856	634	135.156	102.555
83	165.502	516	193.174	137.83
84	110.528	262	117.458	103.598
85	180.754	607	251.373	110.135
86	81.7685	89	96.7534	66.7836
87	102.998	171	127.131	78.8657
88	129.826	336	142.389	117.263
89	160.531	453	194.459	126.602
90	224.151	511	255.559	192.743
91	224.077	881	312.852	135.302
92	80.6193	81	93.508	67.7306
93	90.7486	117	101.116	80.3815
94	273.626	2221	347.148	200.105
95	108.513	203	119.361	97.6649
96	63.5424	66	71.6494	55.4355
97	84.4064	111	105.465	63.3479
98	115.148	193	134.127	96.1689
99	149.199	395	182.542	115.857
100	67.442	93	79.737	55.147
101	203.821	811	258.857	148.786
102	157.963	619	175.23	140.695
103	214.883	1084	262.679	167.086
104	134.45	280	149.235	119.664
105	94.4456	108	104.561	84.3303
106	154.503	668	168.538	140.468
107	82.0192	177	88.5416	75.4968
108	79.7316	102	85.2514	74.2119
109	75.4752	100	90.0286	60.9217
110	146.31	479	209.185	83.4352
111	107.626	162	125.025	90.2276
112	105.115	531	118.53	91.6991
113	76.965	107	82.0422	71.8877
114	95.0265	118	103.262	86.7911
115	147.721	311	190.094	105.347
116	90.9316	202	104.981	76.882
117	93.4057	152	97.0885	89.7229
118	102.008	175	109.732	94.2836
119	94.8064	123	111.976	77.637
120	103.052	141	128.564	77.5395
121	90.661	98	110.302	71.0196
122	109.086	124	115.992	102.18
123	114.961	295	130.196	99.7252
124	123.476	253	134.596	112.356
125	155.401	413	174.143	136.66
126	90.3113	137	93.1558	87.4669
127	77.2726	82	82.7358	71.8093
128	85.2567	140	88.3824	82.131
129	91.7047	124	102.505	80.9046
130	150.75	369	174.483	127.016
131	195.336	645	258.457	132.216
132	74.9565	81	84.1109	65.8021
133	100.095	230	104.391	95.7988
134	82.7417	91	104.279	61.2048
135	106.998	189	111.267	102.729
136	147.712	643	210.188	85.2369
137	87.2767	93	105.641	68.912
138	106.676	232	113.256	100.095
139	131.689	303	154.808	108.571
140	217.4	593	229.142	205.659
141	113.648	194	117.872	109.424
142	136.663	261	166.038	107.287
143	94.9318	150	108.831	81.0326
144	112.43	326	125.229	99.6307
145	74.1828	79	76.2958	72.0698
146	107.117	394	122.793	91.4414
147	173.029	341	197.646	148.411
148	127.634	362	131.916	123.353
149	193.976	650	245.247	142.705
150	86.4992	87	100.268	72.7302
151	226	570	326.39	125.611
152	119.699	231	142.682	96.7155
153	119.765	201	132.551	106.979
154	109.594	171	111.793	107.396
155	237.5	1128	255.338	219.663
156	59.0171	74	66.2975	51.7366
157	182.274	831	246.762	117.786
158	179.465	680	248.871	110.059
159	154.613	400	190.595	118.631
160	132.211	268	179.827	84.5943
161	115.751	313	121.47	110.032
162	136.85	224	175.131	98.5685
163	77.5362	78	83.5386	71.5339
164	74.9057	139	85.9012	63.9102
165	115.185	220	133.732	96.6377
166	122.813	259	129.478	116.147
167	75.8892	85	84.3594	67.4191
168	91.5439	106	97.76	85.3279
169	73.9622	78	93.1584	54.7661
170	84.1314	118	87.0477	81.2152
171	140.027	716	185.185	94.8695
172	108.293	174	116.441	100.144
173	90.3809	103	99.4796	81.2823
174	76.397	93	88.2189	64.575
175	176.906	590	234.454	119.359
176	85.2389	91	87.0634	83.4144
177	117.721	431	131.799	103.642
178	196.248	700	261.431	131.064
179	143.823	255	180.103	107.543
180	79.9826	96	82.1878	77.7774
181	85.8831	117	95.0691	76.6972
182	105.282	182	114.114	96.4503
183	382.072	4328	521.436	242.709
184	108.044	132	113.471	102.617
185	87.2379	86	110.1	64.3759
186	74.9465	68	75.8602	74.0328
187	123.381	189	143.047	103.716
188	158.726	351	201.466	115.985
189	121.26	275	141.641	100.88
190	134.511	372	139.036	129.985
191	106.81	148	107.436	106.184
192	160.59	513	188.8	132.38
193	84.0504	131	88.4005	79.7003
194	75.5293	82	81.3324	69.7263
195	110.311	159	124.927	95.6945
196	79.6649	72	100.702	58.6283
197	165.812	678	184.575	147.05
198	108.611	534	116.453	100.769
199	84.3327	93	85.8203	82.845
200	113.465	288	140.235	86.6952
201	134.359	365	151.814	116.905
202	119.798	270	133.311	106.286
203	148.481	353	197.245	99.7165
204	218.79	843	326.01	111.57
205	63.4254	57	67.7642	59.0865
206	88.4701	100	89.4283	87.512
207	93.8819	198	103.752	84.0121
208	209.42	722	267.935	150.905
209	121.289	250	143.816	98.7617
210	77.8427	92	82.9265	72.759
211	86.5057	93	92.3371	80.6742
212	120.471	312	135.614	105.329
213	97.8359	116	114.325	81.3471
214	79.7665	75	90.9664	68.5667
215	81.5437	137	90.593	72.4945
216	91.0947	528	100.509	81.6807
217	140.59	271	178.449	102.732
218	116.596	235	130.214	102.978
219	404.52	1821	520.345	288.695
220	100.895	143	117.695	84.095
221	57.496	55	62.9332	52.0588
222	111.507	201	133.289	89.7259
223	93.498	122	116.823	70.1728
224	258.026	1788	311.523	204.53
225	88.5334	123	98.6662	78.4007
226	80.0461	91	86.0847	74.0076
227	85.085	102	96.1398	74.0302
228	268.179	1728	359.368	176.99
229	102.996	109	114.309	91.6834
230	91.7225	246	106.908	76.5373
231	139.704	339	173.37	106.038
232	185.793	614	283.99	87.5963
233	190.33	736	243.604	137.055
234	76.7868	114	85.4877	68.086
235	73.7479	74	80.4073	67.0885
236	79.9308	72	88.8326	71.0291
237	161.47	582	211.194	111.745
238	189.852	688	240.804	138.899
239	78.6477	188	89.0045	68.291
240	124.779	452	147.197	102.361
241	103.626	269	141.58	65.6715
242	100.62	139	117.736	83.5035
243	103.784	249	120.083	87.4856
244	95.0348	360	109.454	80.6156
245	103.25	166	124.55	81.9507
246	93.5561	182	103.722	83.3905
247	95.6557	187	111.465	79.8465
248	119.991	247	143.858	96.123
249	204.451	1166	217.568	191.334
250	110.034	270	129.035	91.0324
251	185.725	566	204.502	166.948
252	84.1798	90	95.6466	72.7129
253	103.186	122	116.256	90.1169
254	75.5422	111	99.8888	51.1955
255	157.855	277	195.379	120.331
256	105.951	184	123.493	88.4081
257	97.1973	224	99.3374	95.0573
258	157.794	632	196.76	118.829
259	171.967	413	220.918	123.015
260	106.344	181	114.297	98.3908
261	65.6713	55	84.5192	46.8234
262	148.982	433	165.603	132.362
263	113.191	166	126.504	99.8781
264	135.912	607	154.14	117.685
265	158.122	478	190.618	125.625
266	118.493	266	129.534	107.452
267	116.686	183	139.97	93.4008
268	93.2561	168	106.612	79.9004
269	95.0921	102	101.346	88.8377
270	168.539	552	231.654	105.424
271	277.532	1122	383.947	171.116
272	111.967	189	115.843	108.091
273	93.8538	94	103.843	83.8649
274	233.165	1340	268.647	197.683
275	124.283	242	141.34	107.225
276	96.5928	147	113.02	80.1652
277	103.144	148	110.137	96.1503
278	94.0245	125	104.794	83.2551
279	79.4561	88	101.669	57.2436
280	94.9057	127	99.4842	90.3273
281	85.3259	126	89.2538	81.3981
282	78.8441	96	80.5825	77.1058
283	140.483	415	184.512	96.4529
284	100.205	133	110.189	90.2223
285	125.898	244	145.828	105.969
286	122.883	226	154.258	91.5079
287	117.215	210	129.67	104.759
288	128.01	263	145.86	110.16
289	223.667	965	296.625	150.71
290	84.9715	90	105.096	64.8468
291	293.554	1322	398.472	188.637
292	117.02	292	126.061	107.978
293	132.273	212	178.187	86.3592
294	105.131	222	118.424	91.8372
295	91.8986	109	112.044	71.7535
296	99.119	184	114.574	83.6645
297	304.776	1128	387.795	221.756
298	112.655	316	131.835	93.4753
299	148.954	673	164.454	133.454
300	88.6675	113	104.935	72.3999
301	93.96	127	97.8608	90.0591
302	142.946	503	154.333	131.559
303	192.62	523	254.019	131.222
304	146.031	326	174.231	117.831
305	110.546	240	127.995	93.0969
306	101.868	207	119.915	83.821
307	223.724	923	236.443	211.004
308	107.661	180	111.754	103.569
309	78.4155	91	85.1534	71.6776
310	123.452	512	135.812	111.092
311	147.486	362	173.103	121.87
312	188.648	1149	222.845	154.45
313	96.9001	159	103.216	90.5843
314	105.964	150	117.011	94.9176
315	72.5552	72	97.635	47.4754
316	141.085	354	177.453	104.717
317	129.401	296	159.562	99.2392
318	129.386	260	158.577	100.195
319	85.8855	99	94.0466	77.7245
320	94.3544	258	120.635	68.0733
321	96.5867	401	105.657	87.517
322	145.512	560	190.387	100.637
323	176.38	543	208.887	143.873
324	106.261	172	124.648	87.8743
325	80.333	96	90.6931	69.973
326	80.8519	105	82.2896	79.4142
327	104.236	203	107.716	100.756
328	88.3563	98	104.336	72.3768
329	108.634	219	115.743	101.525
330	102.643	180	118.513	86.7722
331	70.1348	106	75.6359	64.6338
332	129.856	425	157.542	102.17
333	198.351	797	252.755	143.947
334	137.486	413	153.801	121.17
335	96.2769	138	101.393	91.1609
336	96.0838	157	110.361	81.8064
337	107.565	234	113.333	101.796
338	91.9492	106	94.6447	89.2537
339	140.072	347	173.824	106.319
340	88.2543	156	99.0569	77.4517
341	109.847	164	114.941	104.754
342	337.209	2503	377.874	296.544
343	309.828	1529	404.949	214.707
344	83.2562	70	86.5413	79.971
345	97.3888	149	125.765	69.0129
346	105.071	201	107.903	102.239
347	103.205	159	123.55	82.8594
348	79.3875	88	88.7053	70.0697
349	113.129	204	129.541	96.7173
350	79.5324	144	80.9524	78.1123
351	112.433	279	116.936	107.93
352	124.117	175	151.307	96.9263
353	153.071	497	159.467	146.676
354	98.2378	177	118.743	77.7328
355	85.3851	181	89.1861	81.5842
356	123.17	248	149.624	96.7152
357	79.3348	87	79.5846	79.0851
358	126.303	209	154.709	97.8961
359	100.769	189	114.334	87.2042
360	162.831	394	191.489	134.172
361	88.6107	76	100.691	76.5299
362	143.63	318	176.012	111.247
363	174.139	516	198.839	149.438
364	139.573	369	157.711	121.435
365	105.238	187	124.383	86.0931
366	130.195	297	154.2	106.189
367	195.059	604	258.672	131.446
368	83.8354	89	88.9754	78.6953
369	114.658	245	118.29	111.027
370	108.192	167	124.697	91.6874
371	132.295	390	159.618	104.973
372	88.1986	166	98.6722	77.725
373	81.6964	103	97.4715	65.9213
374	83.7305	89	97.0765	70.3844
375	217.991	1069	276.955	159.028
376	66.0661	70	72.249	59.8831
377	108.752	161	129.419	88.0862
378	158.558	526	187.413	129.703
379	144.141	501	164.292	123.99
380	160.547	523	204.916	116.177
381	87.2527	413	88.2439	86.2615
382	144.101	378	187.604	100.599
383	84.9628	134	100.136	69.79
384	136.995	255	149.372	124.617
385	170.705	403	229.644	111.766
386	136.496	619	151.088	121.904
387	82.7984	126	92.5809	73.016
388	60.2882	57	67.2938	53.2825
389	101.138	133	113.496	88.7791
390	91.5007	143	107.986	75.0159
391	267.757	1089	341.432	194.082
392	63.3753	59	68.8163	57.9343
393	92.4914	105	92.7655	92.2173
394	181.544	599	249.792	113.297
395	118.173	328	153.317	83.0286
396	149.605	382	175.783	123.427
397	70.218	58	76.4886	63.9474
398	99.5713	193	111.013	88.1296
399	123.284	200	155.433	91.1341
400	139.881	385	164.751	115.01
401	93.4644	127	103.586	83.3429
402	101.505	127	103.591	99.4193
403	154.598	307	212.524	96.6724
404	152.622	350	224.327	80.9172
405	149.644	534	174.101	125.187
406	133.862	312	148.633	119.09
407	75.8037	178	90.9317	60.6757
408	110.694	494	142.095	79.292
409	297.817	1031	424.943	170.691
410	162.222	395	199.165	125.279
411	68.0387	66	75.0416	61.0358
412	100.779	142	115.418	86.1392
413	100.106	208	109.652	90.5601
414	92.096	131	106.236	77.9561
415	127.764	304	141.219	114.308
416	99.7915	143	113.063	86.5203
417	110.174	184	135.389	84.958
418	114.86	160	130.588	99.1328
419	85.7053	84	93.9549	77.4557
420	113.595	214	117.502	109.688
421	134.103	364	167.703	100.503
422	93.9143	83	107.464	80.3648
423	85.8132	144	100.485	71.1413
424	85.1532	143	109.962	60.3448
425	80.2747	100	95.1538	65.3956
426	72.0365	86	77.5375	66.5355
427	101.141	159	110.95	91.3326
428	116.734	215	133.826	99.6432
429	118.741	333	122.152	115.329
430	97.8267	126	105.013	90.6403
431	176.876	782	183.603	170.149
432	104.201	157	114.245	94.1568
433	157.054	358	168.939	145.169
434	103.552	159	111.275	95.829
435	118.843	189	121.548	116.137
436	89.1661	211	108.76	69.5718
437	71.4361	92	75.7717	67.1005
438	81.937	84	91.9637	71.9102
439	74.3759	76	81.9785	66.7732
440	160.797	549	161.543	160.05
441	104.246	182	121.611	86.8809
442	81.1612	71	92.7	69.6225
443	228.346	599	333.709	122.983
444	121.347	294	145.294	97.3994
445	109.79	171	153.973	65.6074
446	92.8696	133	105.362	80.3777
447	94.3839	139	114.252	74.5156
448	106.236	166	120.031	92.442
449	122.551	236	129.888	115.213
450	164.191	405	183.978	144.404
451	79.2844	77	86.9739	71.595
452	88.5486	98	95.3497	81.7476
453	85.7209	110	88.2754	83.1663
454	114.295	193	126.425	102.165
455	82.4796	101	93.0439	71.9153
456	133.47	305	155.569	111.37
457	107.98	232	109.445	106.516
458	87.786	88	89.6488	85.9231
459	80.9417	82	92.6248	69.2587
460	77.7247	152	94.9173	60.5322
461	87.5686	170	92.4106	82.7265
462	66.4169	84	75.4557	57.3781
463	118.977	223	133.059	104.894
464	121.674	185	156.956	86.3925
465	174.674	370	245.201	104.147
466	94.1136	133	96.5834	91.6438
467	77.8103	140	94.6021	61.0184
468	103.885	144	121.027	86.743
469	62.8824	50	69.8497	55.9151
470	106.773	179	124.769	88.7766
471	127.639	210	141.524	113.753
472	94.6874	160	107.371	82.0038
473	95.5285	121	115.033	76.0245
474	117.805	222	139.221	96.3898
475	97.959	139	119.698	76.2202
476	77.4026	66	81.4801	73.325
477	84.1533	103	96.4566	71.85
478	71.2753	71	78.9113	63.6393
479	89.6277	141	96.4007	82.8547
480	155.626	340	211.672	99.5797
481	156.784	417	214.061	99.5071
482	91.1431	133	96.8176	85.4686
483	91.076	94	108.565	73.5866
484	103.678	169	113.796	93.5594
485	115.746	247	134.93	96.5627
486	125.161	421	160.07	90.2529
487	91.8256	257	105.09	78.5608
488	232.041	990	286.46	177.621
489	99.9766	157	113.066	86.887
490	142.731	230	186.201	99.2607
491	177.557	702	210.325	144.79
492	101.098	176	116.547	85.6487
493	94.614	147	102.363	86.8652
494	97.6554	245	102.642	92.6687
495	101.889	193	105.528	98.2502
496	70.3796	62	75.739	65.0203
497	83.9282	82	96.8472	71.0092
498	77.0581	74	86.802	67.3142
499	122.516	257	144.429	100.603
500	137.321	215	167.93	106.712
501	94.9431	123	106.228	83.6586
502	107.672	154	131.089	84.256
503	78.2898	84	85.5294	71.0502
504	96.9455	127	113.237	80.654
505	65.6522	116	70.9378	60.3666
506	84.1684	89	93.8077	74.529
507	97.5555	116	103.092	92.0194
508	95.4577	135	98.0055	92.91
509	78.5564	83	95.2707	61.842
510	95.9851	116	109.82	82.1506
511	84.694	87	95.3336	74.0544
512	115.775	158	136.205	95.3444
513	91.1015	139	96.4885	85.7145
514	169.6	435	221.816	117.385
515	65.8435	72	71.4482	60.2388
516	180.385	440	254.781	105.989
517	88.9258	267	98.9203	78.9312
518	96.783	492	107.941	85.6249
519	85.7384	91	87.3176	84.1593
520	116.411	173	136.215	96.608
521	165.336	668	202.8	127.872
522	110.875	173	134.621	87.1285
523	79.0901	88	82.3782	75.802
524	82.0467	84	96.7338	67.3596
525	159.486	356	212.212	106.76
526	93.3391	228	109.117	77.5611
527	115.296	210	137.454	93.1372
528	83.5107	128	104.128	62.8932
529	236.658	962	336.189	137.127
530	153.896	888	198.055	109.736
531	127.907	179	155.782	100.032
532	133.531	307	150.815	116.248
533	86.3117	100	103.207	69.416
534	89.9789	98	103.698	76.2598
535	115.959	298	122.972	108.946
536	80.4273	97	87.773	73.0816
537	86.6894	101	95.3469	78.0319
538	87.8375	187	94.6252	81.0499
539	86.7295	217	108.602	64.8573
540	90.6588	91	103.511	77.8063
541	106.76	137	108.783	104.737
542	117.825	345	126.685	108.965
543	93.6261	142	96.2071	91.045
544	126.707	362	154.178	99.2372
545	182.857	659	236.94	128.774
546	99.2011	236	117.114	81.2886
547	85.7815	96	97.9036	73.6594
548	83.8494	83	87.5122	80.1866
549	139.718	395	155.417	124.02
550	127.986	242	140.933	115.039
551	105.242	169	122.697	87.7878
552	87.6985	145	100.878	74.5189
553	117.372	230	123.154	111.591
554	146.144	622	202.249	90.0392
555	80.8398	77	89.179	72.5005
556	82.4291	98	94.4511	70.4071
557	70.7043	63	75.2739	66.1348
558	77.6945	139	86.9753	68.4137
559	111.309	150	119.888	102.729
560	64.1803	63	66.0797	62.281
561	94.34	212	108.636	80.0444
562	108.326	207	135.247	81.405
563	84.966	82	97.63	72.302
564	132.936	256	170.981	94.8909
565	66.0555	64	73.1603	58.9506
566	88.7429	114	95.0854	82.4004
567	68.7402	70	71.9222	65.5582
568	101.649	428	101.892	101.405
569	78.0565	76	89.1208	66.9923
570	173.087	357	198.411	147.763
571	84.0802	85	93.1089	75.0514
572	120.095	218	123.87	116.32
573	118.036	234	130.489	105.583
574	116.921	432	132.919	100.924
575	81.398	144	93.962	68.834
576	186.782	508	251.161	122.403
577	78.1093	79	84.8941	71.3245
578	94.086	104	119.348	68.8244
579	94.147	118	95.7342	92.5598
580	123.453	219	143.731	103.175
581	105.018	254	105.906	104.13
582	97.1466	109	106.228	88.0654
583	163.844	293	232.98	94.708
584	105.364	159	119.901	90.8265
585	110.474	311	134.53	86.4175
586	99.8304	159	108.111	91.5503
587	120.655	359	135.664	105.646
588	90.7055	194	105.286	76.1245
589	100.164	124	102.411	97.9179
590	96.2673	111	117.918	74.6166
591	159.524	876	207.979	111.07
592	88.5786	248	93.7536	83.4036
593	68.8925	72	78.726	59.0589
594	84.0519	107	97.3973	70.7066
595	84.2626	90	86.4043	82.1208
596	80.7979	399	82.7539	78.842
597	62.6328	62	80.206	45.0596
598	86.4139	117	97.6104	75.2174
599	52.5058	50	61.9539	43.0577
600	100.779	183	108.248	93.3094
601	74.9579	69	86.2426	63.6732
602	224.372	685	267.902	180.843
603	89.9378	140	96.8785	82.9971
604	78.6146	82	89.2476	67.9817
605	110.019	156	137.905	82.1334
606	123.971	240	164.187	83.754
607	92.9865	96	101.498	84.4753
608	100.697	184	103.805	97.5891
609	128.514	249	149.283	107.745
610	122.245	232	160.71	83.7801
611	72.9431	79	76.6578	69.2285
612	118.939	208	124.168	113.71
613	96.4438	111	117.781	75.1065
614	135.364	266	161.442	109.287
615	93.1063	163	99.0465	87.166
616	77.0039	75	81.3015	72.7063
617	96.1714	98	102.889	89.4534
618	98.8777	131	107.134	90.6216
619	92.5432	314	109.014	76.0725
620	135.41	325	162.931	107.888
621	83.2841	156	102.736	63.8318
622	253.809	1388	309.092	198.526
623	78.9686	72	90.6983	67.2388
624	92.5291	95	111.26	73.7981
625	68.7431	86	77.6325	59.8538
626	119.278	293	131.507	107.05
627	180.958	490	233.111	128.804
628	146.1	498	182.289	109.911
629	123.459	263	161.079	85.839
630	105.225	154	113.259	97.191
631	77.4749	88	80.5733	74.3764
632	70.9639	68	77.2123	64.7155
633	91.3565	101	107.31	75.4029
634	90.4696	93	108.685	72.2538
635	81.2677	76	88.2844	74.2509
636	83.5135	91	90.6362	76.3907
637	66.0685	52	73.4905	58.6465
638	131.951	409	140.731	123.171
639	67.5005	64	83.3207	51.6803
640	120.238	230	126.834	113.641
641	74.2068	72	83.5081	64.9054
642	203.559	697	261.652	145.465
643	104.389	146	120.799	87.979
644	78.8911	170	91.5274	66.2549
645	100.497	261	121.971	79.0221
646	92.237	191	95.6601	88.8138
647	119.906	187	142.321	97.4911
648	111.269	281	133.102	89.4359
649	85.6826	96	100.019	71.346
650	98.2303	226	130.824	65.6369
651	88.4516	98	97.2351	79.6681
652	78.0501	84	81.4055	74.6947
653	77.1676	71	85.3907	68.9446
654	104.703	144	126.135	83.2715
655	88.995	112	105.987	72.0032
656	119.733	350	149.309	90.1574
657	73.4929	70	91.2417	55.7442
658	72.9258	68	73.5004	72.3513
659	130.496	243	138.162	122.83
660	133.873	281	156.217	111.529
661	62.3191	72	80.9563	43.6818
662	110.495	150	125.986	95.0033
663	78.8855	84	80.4547	77.3163
664	91.2607	150	94.2596	88.2618
665	64.5149	56	67.8676	61.1621
666	86.5334	86	90.6409	82.4258
667	91.0293	96	109.348	72.7107
668	88.8635	202	95.3694	82.3576
669	76.3518	81	91.1328	61.5708
670	94.1787	101	95.8772	92.4803
671	81.2881	159	87.9088	74.6673
672	82.5979	97	95.5988	69.5969
673	86.7905	111	107.347	66.2343
674	78.272	97	100.106	56.4376
675	100.573	244	102.992	98.1536
676	83.5097	167	105.161	61.8584
677	97.033	171	109.449	84.6167
678	85.8779	92	90.3115	81.4444
679	111.331	229	139.837	82.8248
680	102.613	143	121.74	83.486
681	101.476	248	111.409	91.5424
682	87.0433	104	110.589	63.4972
683	71.4811	71	71.5757	71.3865
684	80.4495	94	84.1465	76.7526
685	106.04	158	126.755	85.3258
686	163.321	327	182.162	144.48
687	159.421	400	213.921	104.921
688	121.788	339	135.032	108.545
689	65.1615	52	69.4756	60.8474
690	67.8924	80	70.8372	64.9476
691	104.286	141	108.049	100.523
692	101.925	139	106.033	97.8175
693	86.1791	90	91.318	81.0403
694	108.306	157	126.456	90.1551
695	107.925	135	140.991	74.8593
696	100.948	270	115.225	86.6708
697	128.097	328	140.75	115.445
698	107.732	256	119.217	96.2481
699	109.185	196	114.535	103.835
700	127.603	262	131.531	123.674
701	92.1375	170	109.224	75.0506
702	142.301	334	184.48	100.121
703	96.3452	108	108.169	84.521
704	66.3679	56	69.6859	63.0498
705	108.056	139	114.492	101.621
706	95.2615	147	102.81	87.7131
707	80.6698	79	86.7843	74.5554
708	91.9992	124	94.8249	89.1736
709	85.5084	297	98.5851	72.4317
710	66.1374	73	70.7788	61.496
711	102.263	372	117.137	87.388
712	88.3297	94	92.0883	84.5711
713	107.908	156	111.388	104.429
714	97.9811	106	108.906	87.0561
715	87.4399	248	92.5518	82.328
716	63.9628	76	75.9542	51.9714
717	163.145	477	200.227	126.063
718	106.351	141	115.382	97.321
719	77.8473	87	88.4858	67.2088
720	77.4466	76	93.8653	61.028
721	67.0637	73	73.0874	61.04
722	72.5574	117	86.2786	58.8362
723	135.847	246	159.049	112.645
724	170.909	501	198.555	143.263
725	114.226	267	133.331	95.12
726	96.9113	150	113.48	80.3423
727	126.263	213	139.238	113.288
728	98.6253	112	111.883	85.3672
729	82.0716	142	91.7116	72.4317
730	99.7989	132	121.367	78.2309
731	89.1326	140	98.604	79.6612
732	65.1987	55	70.9298	59.4675
733	107.161	228	108.084	106.238
734	86.4425	101	95.7789	77.1061
735	61.4515	164	63.3966	59.5063
736	123.01	207	156.328	89.6924
737	93.8826	83	112.749	75.0163
738	82.3757	101	96.6896	68.0618
739	80.7155	87	86.7579	74.6731
740	56.5421	56	63.5855	49.4986
741	98.0702	214	111.528	84.6128
742	77.0163	73	83.7358	70.2968
743	105.116	242	115.984	94.2476
744	82.4058	88	86.9869	77.8246
745	135.991	282	144.299	127.683
746	93.3136	117	97.0086	89.6187
747	160.875	804	196.73	125.02
748	92.3795	159	99.143	85.6161
749	62.8119	51	66.3162	59.3076
750	66.6947	65	77.457	55.9324
751	70.739	66	83.7286	57.7493
752	120.992	500	137.899	104.085
753	91.2809	87	92.6873	89.8745
754	103.996	228	114.556	93.436
755	101.818	153	112.796	90.8407
756	109.817	275	121.454	98.1795
757	90.31	119	94.4009	86.2191
758	76.2832	73	85.223	67.3435
759	114.999	269	136.423	93.5755
760	66.099	61	73.4808	58.7172
761	88.59	89	95.8011	81.3789
762	163.042	446	178.212	147.872
763	86.2192	100	88.7257	83.7128
764	108.233	164	111.009	105.458
765	70.3585	163	83.7348	56.9823
766	103.374	136	115.29	91.4576
767	93.6345	121	99.4458	87.8232
768	85.5237	96	93.2535	77.7939
769	101.625	112	113.434	89.816
770	182.443	508	188.204	176.683
771	73.4248	66	79.9182	66.9313
772	60.1166	57	72.0902	48.143
773	138.495	356	171.961	105.029
774	86.0636	141	95.6381	76.489
775	85.8014	140	105.279	66.3237
776	154.417	544	198.728	110.106
777	69.4992	76	76.5884	62.4101
778	115.883	209	123.075	108.691
779	78.8134	89	100.086	57.5413
780	216.962	938	242.957	190.966
781	102.091	165	117.899	86.2838
782	150.299	242	203.659	96.939
783	90.2162	119	93.3387	87.0936
784	97.0343	130	121.061	73.0077
785	100.322	235	100.5	100.144
786	82.551	100	93.0006	72.1013
787	87.0572	101	95.6313	78.4831
788	81.9	105	97.2436	66.5564
789	110.311	237	124.306	96.316
790	84.7584	97	94.7455	74.7713
791	148.346	438	169.01	127.682
792	262.085	2765	339.238	184.932
793	111.559	219	136.403	86.7142
794	105.126	174	117.731	92.5207
795	160.792	534	205.987	115.596
796	91.6485	108	100.681	82.6162
797	95.7029	126	105.585	85.8205
798	103.72	159	109.689	97.7515
799	97.8538	122	98.9643	96.7432
800	85.9913	132	93.1733	78.8093
801	109.506	247	133.871	85.1414
802	77.8167	75	92.6467	62.9868
803	82.3981	168	91.5649	73.2314
804	106.84	284	118.066	95.6147
805	86.564	110	113.252	59.8756
806	86.1644	99	92.5653	79.7636
807	126.611	244	169.723	83.5
808	86.3109	106	89.7453	82.8764
809	67.2246	69	76.8613	57.5879
810	99.7694	122	104.932	94.6068
811	62.3998	55	71.5889	53.2108
812	111.391	270	122.886	99.8966
813	75.1324	91	89.508	60.7568
814	109.781	172	120.036	99.5261
815	101.52	167	107.354	95.6863
816	74.9889	88	81.6935	68.2843
817	86.9292	109	98.0626	75.7957
818	64.1144	73	76.2495	51.9794
819	77.8838	163	84.5577	71.21
820	131.41	308	165.154	97.6657
821	78.9781	79	80.8297	77.1266
822	114.229	293	123.056	105.402
823	109.6	219	123.675	95.5248
824	121.135	187	151.527	90.7431
825	66.7355	73	70.0323	63.4386
826	76.2062	153	89.0038	63.4086
827	97.3845	241	102.297	92.4723
828	107.653	207	113.807	101.499
829	83.0518	79	93.9279	72.1756
830	102.762	141	109.469	96.0561
831	89.8418	121	103.055	76.6288
832	77.5359	69	77.5563	77.5157
833	84.0825	101	98.8345	69.3305
834	126.097	342	130.969	121.226
835	89.1475	81	103.595	74.6998
836	98.5739	160	116.7	80.4474
837	111.885	164	141.757	82.0132
838	84.2254	233	91.3223	77.1286
839	83.6658	83	98.2302	69.1013
840	92.5787	104	101.7	83.4576
841	76.6664	71	81.431	71.9019
842	144.133	276	195.199	93.0667
843	70.6913	67	80.0383	61.3443
844	109.508	147	132.406	86.6103
845	162.676	378	211.643	113.708
846	99.9167	147	105.951	93.8821
847	69.9215	61	73.6585	66.1844
848	91.4631	101	106.55	76.3766
849	108.458	185	116.513	100.404
850	97.0246	348	107.024	87.0252
851	84.8177	76	93.5247	76.1107
852	98.8299	123	115.284	82.3762
853	94.1951	280	102.076	86.3143
854	113.825	274	133.844	93.8058
855	101.666	120	113.848	89.4844
856	65.0702	146	73.3396	56.8007
857	73.1961	70	87.4538	58.9384
858	75.9836	101	86.0836	65.8836
859	89.6807	93	98.4832	80.8782
860	80.8208	85	83.5868	78.0548
861	73.7102	76	82.0899	65.3305
862	79.4356	73	81.2358	77.6353
863	101.398	113	111.036	91.76
864	102.658	174	105.8	99.516
865	63.4296	70	73.4675	53.3917
866	73.4918	64	90.9376	56.046
867	70.8246	67	73.5338	68.1154
868	101.307	203	111.899	90.7144
869	94.0241	156	109.698	78.3499
870	74.3698	72	79.0225	69.7171
871	86.5768	149	104.811	68.343
872	230.85	1256	285.744	175.956
873	91.4825	182	97.8394	85.1255
874	92.1149	158	98.3277	85.9021
875	93.905	111	101.726	86.0842
876	63.404	53	69.7538	57.0543
877	82.8725	453	94.3633	71.3817
878	119.177	230	128.683	109.672
879	99.2336	148	102.976	95.4911
880	121.882	554	135.86	107.904
881	53.3695	50	62.9636	43.7754
882	90.8026	86	95.4684	86.1368
883	60.0272	56	62.9192	57.1353
884	103.418	133	123.198	83.6382
885	104.878	215	122.726	87.0311
886	86.3785	76	89.2809	83.4762
887	101.352	145	115.178	87.5263
888	56.9812	53	75.2692	38.6931
889	79.773	74	81.9227	77.6234
890	130.052	227	166.223	93.8804
891	91.7172	105	95.7435	87.6909
892	83.8042	159	87.9759	79.6325
893	91.6564	102	108.963	74.3495
894	131.732	311	139.732	123.732
895	90.8862	214	105.115	76.6571
896	70.969	140	85.4873	56.4507
897	97.9868	138	116.235	79.7391
898	56.3858	52	56.6783	56.0932
899	64.8142	52	65.9987	63.6297
900	92.993	147	102.141	83.8448
901	80.1034	92	83.5273	76.6795
902	71.2471	81	76.8067	65.6875
903	117.668	185	127.55	107.785
904	81.6675	79	90.1287	73.2064
905	84.8839	82	90.1091	79.6588
906	54.1683	51	66.7661	41.5705
907	85.7358	94	101.94	69.5311
908	84.7502	87	100.784	68.7164
909	128.795	615	138.782	118.809
910	95.2344	136	111.881	78.5877
911	86.5909	102	103.101	70.0812
912	81.9205	89	92.3902	71.4509
913	78.2171	102	86.3154	70.1189
914	96.1069	133	99.1164	93.0974
915	111.241	166	141.172	81.31
916	84.9287	84	92.5689	77.2885
917	55.0943	52	56.8346	53.354
918	118.216	207	137.027	99.4053
919	107.53	161	128.381	86.6788
920	101.331	109	120.078	82.5834
921	150.584	366	162.016	139.152
922	68.684	60	71.5239	65.844
923	71.3881	71	78.168	64.6082
924	86.6168	226	97.0296	76.2039
925	64.297	57	72.1485	56.4455
926	65.3924	69	73.1526	57.6323
927	77.122	135	89.0414	65.2026
928	101.726	141	110.193	93.2586
929	102.581	134	110.219	94.9437
930	86.852	91	98.5593	75.1446
931	57.8989	50	62.0932	53.7046
932	66.1944	77	77.1876	55.2012
933	111.976	247	121.372	102.581
934	164.601	395	207.197	122.005
935	96.8845	177	109.105	84.6638
936	91.8804	109	114.746	69.0147
937	117.638	291	133.681	101.595
938	93.0475	96	104.346	81.7491
939	96.1989	182	97.2492	95.1487
940	87.2936	103	93.1577	81.4295
941	92.3478	108	104.708	79.9881
942	89.903	102	92.381	87.4249
943	107.911	332	122.967	92.8555
944	104.722	643	116.556	92.888
945	61.987	51	63.1011	60.873
946	80.844	119	98.4531	63.2349
947	76.0542	76	77.1329	74.9754
948	69.8014	67	76.4859	63.1169
949	95.4507	167	113.548	77.3536
950	123.596	423	135.964	111.229
951	107.66	186	130.07	85.2499
952	91.8976	254	102.475	81.3205
953	98.1528	97	118.35	77.956
954	98.7454	127	101.768	95.7227
955	62.1739	68	69.4142	54.9335
956	86.629	126	95.7794	77.4787
957	101.064	182	113.435	88.6936
958	115.85	163	129.08	102.62
959	78.7933	183	86.9983	70.5884
960	71.7416	70	74.8551	68.628
961	71.4962	102	76.662	66.3303
962	97.1449	126	108.136	86.1536
963	82.6168	91	97.3796	67.8539
964	81.7408	86	90.1042	73.3774
965	81.3838	80	94.8742	67.8934
966	106.212	231	109.764	102.659
967	60.9634	52	64.5678	57.3589
968	72.2882	100	83.1225	61.4539
969	87.4203	115	97.5785	77.2621
970	97.8403	106	104.72	90.961
971	139.973	213	195.37	84.5753
972	95.0238	103	114.034	76.0134
973	132.724	407	153.778	111.669
974	73.1425	73	76.4006	69.8844
975	88.1286	102	93.8189	82.4383
976	94.0754	244	112.32	75.8308
977	88.077	91	99.0507	77.1034
978	67.3861	68	75.2412	59.531
979	83.9157	78	89.8628	77.9687
980	84.3328	84	89.9068	78.7588
981	93.8254	98	108.574	79.077
982	90.4307	119	102.886	77.9752
983	71.4303	71	86.8427	56.018
984	57.4329	52	61.4932	53.3725
985	104.055	159	114.387	93.7236
986	87.3676	93	91.1636	83.5715
987	74.869	94	89.7015	60.0366
988	78.7192	73	91.2534	66.185
989	76.231	168	90.3779	62.084
990	128.267	263	134.584	121.95
991	81.7225	97	86.8034	76.6415
992	85.6821	93	95.0523	76.3118
993	78.9248	74	90.248	67.6016
994	57.7177	50	59.2818	56.1535
995	89.9425	114	92.0892	87.7957
996	93.8939	162	103.148	84.6397
997	122.026	365	144.457	99.5939
998	79.3822	80	89.8078	68.9567
999	117.403	260	137.49	97.3161
1000	98.8723	177	107.772	89.9723
1001	110.986	288	122.212	99.7596
1002	104.557	156	109.089	100.024
1003	86.0573	272	105.401	66.7135
1004	100.496	114	114.176	86.8167
1005	90.663	101	99.1681	82.1579
1006	74.2868	77	85.5652	63.0083
1007	80.771	75	92.9444	68.5976
1008	116.065	170	140.945	91.1859
1009	107.055	401	124.201	89.9081
1010	98.8661	134	111.948	85.784
1011	75.7537	77	79.1457	72.3617
1012	126.035	549	161.414	90.656
1013	103.216	146	111.314	95.1182
1014	82.798	96	92.1693	73.4267
1015	89.9311	106	110.927	68.9356
1016	74.1001	69	78.9477	69.2525
1017	69.1349	57	70.6062	67.6637
1018	88.6472	116	93.0692	84.2252
1019	132.705	240	167.569	97.8397
1020	100.659	122	116.007	85.3108
1021	81.9394	177	85.5453	78.3334
1022	94.6964	129	112.259	77.1339
1023	93.1418	141	114.333	71.9506
1024	103.348	353	127.163	79.5339
1025	139.465	475	163.064	115.867
1026	90.2922	89	106.964	73.6209
1027	82.4319	92	89.2782	75.5855
1028	80.1687	302	86.7877	73.5498
1029	92.1947	98	95.797	88.5924
1030	71.01	68	75.6478	66.3723
1031	98.6247	162	112.159	85.0902
1032	59.5867	55	65.1353	54.0382
1033	97.6788	140	108.797	86.5607
1034	56.3038	56	68.675	43.9327
1035	80.915	72	95.4347	66.3953
1036	103.512	174	116.718	90.3061
1037	76.155	246	80.8746	71.4354
1038	61.3014	50	62.8719	59.731
1039	92.1178	207	102.119	82.1172
1040	89.1969	93	91.4718	86.922
1041	76.4643	79	82.0535	70.8751
1042	98.694	142	113.437	83.951
1043	90.8737	146	109.354	72.3936
1044	85.2914	97	97.763	72.8197
1045	109.354	164	122.011	96.6976
1046	96.2713	137	116.672	75.8702
1047	79.0698	81	93.3084	64.8313
1048	85.0836	83	101.238	68.929
1049	129.533	200	163.658	95.4073
1050	62.1086	50	72.2162	52.001
1051	88.8434	337	93.2028	84.4839
1052	108.749	189	121.628	95.8693
1053	78.4919	76	92.6143	64.3696
1054	81.0077	112	92.8221	69.1933
1055	63.7481	59	64.3357	63.1606
1056	92.104	112	99.403	84.805
1057	90.0297	91	91.4161	88.6433
1058	55.7612	51	67.824	43.6983
1059	100.613	113	120.329	80.8971
1060	81.2278	76	87.5623	74.8933
1061	83.8378	150	87.557	80.1185
1062	115.928	260	129.183	102.673
1063	80.7919	225	88.7626	72.8212
1064	99.6814	129	112.346	87.0166
1065	68.9936	68	69.9408	68.0464
1066	88.247	100	100.791	75.7034
1067	59.8538	50	73.0675	46.64
1068	56.0304	52	63.7747	48.2862
1069	81.3281	90	94.678	67.9782
1070	67.3512	56	71.7574	62.9451
1071	102.282	124	111.267	93.2963
1072	85.2636	92	98.0988	72.4283
1073	78.5241	79	87.4806	69.5677
1074	98.0493	161	100.883	95.2154
1075	82.6576	87	96.1618	69.1535
1076	56.4137	52	61.7528	51.0746
1077	87.346	159	93.1281	81.5639
1078	97.8649	160	103.659	92.0708
1079	66.347	57	71.7157	60.9782
1080	97.9933	140	101.597	94.3892
1081	79.3615	111	90.9026	67.8203
1082	162.473	458	230.282	94.6633
1083	69.2985	69	76.2685	62.3284
1084	105.372	108	118.588	92.1552
1085	135.094	283	146.088	124.099
1086	89.5642	252	102.769	76.359
1087	69.8711	92	82.2514	57.4908
1088	73.6848	87	85.0204	62.3491
1089	89.0707	104	102.878	75.2639
1090	112.261	150	131.866	92.6564
1091	92.7906	215	105.399	80.1823
1092	120.722	199	140.52	100.925
1093	78.9572	88	80.0068	77.9076
1094	62.3929	56	69.1078	55.678
1095	88.0022	151	97.4981	78.5063
1096	73.8075	73	94.7039	52.9111
1097	109.543	200	115.961	103.125
1098	84.5334	90	85.9393	83.1274
1099	86.5671	107	101.036	72.0984
1100	75.1779	93	81.9278	68.428
1101	95.7865	112	109.107	82.4657
1102	81.1935	84	87.208	75.179
1103	99.7082	144	118.289	81.1274
1104	85.4858	677	97.5239	73.4478
1105	73.8864	78	83.0054	64.7673
1106	65.4671	68	84.2854	46.6487
1107	63.9303	56	64.2224	63.6382
1108	72.1667	89	76.3977	67.9356
1109	109.242	207	110.467	108.018
1110	162.586	507	195.917	129.255
1111	87.7305	100	104.577	70.8842
1112	76.8971	99	92.6296	61.1647
1113	88.5969	121	95.1429	82.051
1114	108.938	220	120.794	97.0829
1115	86.7703	98	100.174	73.3662
1116	89.8214	254	90.3484	89.2945
1117	105.772	162	107.288	104.256
1118	73.0268	97	82.327	63.7266
1119	79.9873	73	91.0609	68.9137
1120	106.372	161	129.934	82.8099
1121	100.733	144	125.178	76.2888
1122	103.814	142	106.755	100.873
1123	80.2385	95	91.6168	68.8602
1124	95.2222	86	103.988	86.4564
1125	82.5498	127	91.5309	73.5687
1126	76.9642	80	86.9062	67.0222
1127	99.8542	174	120.047	79.6616
1128	70.5982	57	84.2851	56.9112
1129	70.7811	74	85.9814	55.5807
1130	61.2427	53	70.5715	51.9139
1131	72.5826	79	81.4911	63.6741
1132	81.5984	93	91.8151	71.3817
1133	69.6189	77	79.8363	59.4014
1134	104.713	155	126.633	82.7932
1135	58.5602	51	65.8751	51.2453
1136	69.5085	71	71.428	67.5889
1137	75.627	74	87.7501	63.5038
1138	51.3271	51	57.0983	45.5559
1139	189.204	493	264.8	113.607
1140	113.198	194	124.646	101.751
1141	72.4575	111	86.6724	58.2425
1142	89.8349	346	99.6544	80.0154
1143	158.474	380	178.601	138.348
1144	78.9625	142	103.734	54.1912
1145	95.6517	137	101.724	89.579
1146	74.2986	63	83.7984	64.7988
1147	92.675	184	106.428	78.9224
1148	61.081	50	65.7211	56.4409
1149	108.669	128	117.529	99.8094
1150	81.1928	90	85.5586	76.8271
1151	91.2068	117	99.1819	83.2316
1152	160.074	329	207.275	112.873
1153	60.0786	51	65.2354	54.9219
1154	68.9786	62	78.4869	59.4703
1155	94.6945	108	102.897	86.4923
1156	81.1578	98	91.0885	71.2272
1157	82.1885	82	95.7891	68.5879
1158	84.3671	85	93.5367	75.1975
1159	86.7886	102	90.1997	83.3775
1160	123.104	189	149.576	96.6334
1161	58.4252	50	63.5488	53.3016
1162	61.4167	54	61.9185	60.9149
1163	99.1054	121	105.633	92.5782
1164	83.3519	107	86.7061	79.9976
1165	129.759	289	155.975	103.544
1166	97.8236	177	115.332	80.3157
1167	89.4903	180	108.783	70.1976
1168	105.317	127	121.811	88.8236
1169	92.7619	102	96.5463	88.9775
1170	67.7775	56	80.7516	54.8034
1171	89.24	89	91.0472	87.4327
1172	73.8997	68	86.2233	61.576
1173	98.2274	107	117.636	78.8186
1174	110.107	224	132.742	87.4717
1175	73.0211	80	82.714	63.3281
1176	65.1327	65	71.6703	58.595
1177	69.9278	212	82.8209	57.0347
1178	79.1979	86	89.5184	68.8774
1179	68.8148	73	87.1633	50.4662
1180	67.1356	61	70.6723	63.599
1181	93.3734	104	103.038	83.7086
1182	105.517	159	113.121	97.9121
1183	60.8216	51	61.1005	60.5426
1184	114.577	362	123.043	106.111
1185	80.4248	82	80.4747	80.3749
1186	103.464	260	111.345	95.5833
1187	97.8205	133	100.677	94.9638
1188	54.8041	54	65.1513	44.457
1189	99.8074	159	127.2	72.4146
1190	77.2889	96	92.3822	62.1956
1191	82.3619	93	90.9511	73.7726
1192	82.5375	77	90.0468	75.0283
1193	74.6387	100	85.4805	63.7968
1194	83.3535	97	89.8528	76.8541
1195	61.2406	72	62.8722	59.6089
1196	97.1099	586	101.847	92.3731
1197	61.4868	53	68.456	54.5176
1198	94.7115	108	123.651	65.7717
1199	89.6763	146	104.328	75.0245
1200	93.7479	141	108.313	79.1829
1201	75.497	87	82.4378	68.5561
1202	75.3495	149	85.82	64.879
1203	99.467	154	110.498	88.4362
1204	75.9285	78	85.6882	66.1688
1205	102.316	295	114.573	90.059
1206	101.544	139	113.21	89.878
1207	87.5758	95	101.847	73.3043
1208	79.6476	77	101.664	57.6315
1209	95.8395	105	104.957	86.7224
1210	50.978	54	54.9285	47.0275
1211	78.7736	102	85.2467	72.3005
1212	83.2525	155	90.7862	75.7188
1213	102.427	166	109.767	95.0881
1214	89.6921	109	96.7506	82.6336
1215	69.4352	71	73.1344	65.736
1216	78.4761	100	90.9897	65.9625
1217	92.1598	96	103.347	80.9727
1218	79.4295	92	79.4591	79.3999
1219	62.4986	63	70.6703	54.327
1220	94.9213	120	122.193	67.6496
1221	69.3693	66	77.3345	61.4041
1222	77.6505	154	85.8772	69.4237
1223	104.236	152	128.14	80.333
1224	90.8495	138	99.6434	82.0555
1225	79.3648	130	92.3428	66.3868
1226	77.799	82	97.4774	58.1207
1227	96.4828	107	98.8177	94.1478
1228	57.6495	55	57.916	57.3831
1229	63.9811	52	65.2195	62.7428
1230	62.3609	106	65.4878	59.234
1231	83.2959	71	87.2464	79.3453
1232	80.9334	108	94.7344	67.1324
1233	97.6372	145	102.879	92.395
1234	86.6816	92	97.0003	76.363
1235	94.6899	97	100.637	88.743
1236	156.553	405	193.257	119.849
1237	64.2203	58	68.9171	59.5236
1238	93.1237	124	108.667	77.58
1239	88.4541	174	97.5953	79.3128
1240	73.0778	70	74.0716	72.0839
1241	69.8892	71	72.1259	67.6526
1242	86.2807	143	103.229	69.3327
1243	77.4055	84	89.4336	65.3774
1244	113.712	202	125.301	102.124
1245	104.971	184	111.361	98.5807
1246	86.4424	313	92.094	80.7907
1247	81.9947	112	93.6483	70.3411
1248	103.012	124	122.151	83.8731
1249	84.0847	72	103.289	64.8807
1250	70.5971	65	77.6109	63.5833
1251	96.2752	126	109.317	83.2334
1252	77.7605	82	85.1216	70.3994
1253	78.7608	73	82.2269	75.2949
1254	71.1906	62	74.0871	68.2941
1255	114.822	238	123.401	106.242
1256	62.0634	64	67.7629	56.3638
1257	79.3834	78	87.3483	71.4184
1258	60.206	50	64.3927	56.0194
1259	61.6244	60	71.8277	51.4211
1260	63.6941	54	68.8181	58.5701
1261	106.743	235	136.604	76.8821
1262	73.0959	63	79.624	66.5678
1263	115.641	311	135.653	95.6285
1264	55.9953	56	58.3078	53.6828
1265	73.3509	67	89.6901	57.0118
1266	68.3819	60	81.7614	55.0024
1267	87.7862	113	107.722	67.8505
1268	82.5867	108	89.227	75.9464
1269	80.1859	111	94.2053	66.1665
1270	97.4343	111	101.862	93.0065
1271	89.369	107	93.7366	85.0014
1272	74.7258	69	93.5917	55.8599
1273	100.746	131	108.536	92.9558
1274	84.2775	109	88.083	80.4721
1275	115.949	235	124.527	107.37
1276	102.51	234	106.461	98.5583
1277	101.708	130	113.462	89.953
1278	71.0181	73	80.9278	61.1084
1279	85.3572	86	85.3761	85.3384
1280	137.922	234	183.607	92.2379
1281	114.068	243	127.728	100.407
1282	92.4079	106	96.264	88.5518
1283	98.0919	121	119.057	77.1271
1284	70.9118	163	81.0132	60.8105
1285	107.569	281	117.206	97.9319
1286	92.0889	102	96.1688	88.0091
1287	66.22	54	69.2684	63.1716
1288	85.8741	86	94.4734	77.2749
1289	100.27	141	106.994	93.5458
1290	60.0071	133	66.4552	53.559
1291	92.0021	219	108.451	75.5532
1292	73.141	79	80.9549	65.3272
1293	68.9729	68	76.3892	61.5565
1294	66.0911	68	71.0377	61.1445
1295	67.9125	60	77.3635	58.4615
1296	94.8501	104	106.013	83.6872
1297	74.6836	74	77.0509	72.3164
1298	85.1735	136	88.8602	81.4868
1299	56.2813	50	61.874	50.6886
1300	98.0733	142	106.422	89.7242
1301	103.257	163	132.409	74.1058
1302	89.7079	108	119.338	60.0778
1303	106.812	218	129.017	84.6074
1304	90.4591	94	103.432	77.4867
1305	90.2931	116	94.4949	86.0913
1306	67.8933	67	78.2652	57.5214
1307	91.8752	121	101.335	82.4154
1308	90.6765	114	91.517	89.836
1309	83.0358	169	90.4978	75.5738
1310	84.2267	104	93.9654	74.4881
1311	80.7943	84	85.9428	75.6457
1312	81.4981	80	84.4204	78.5759
1313	79.6978	78	81.1097	78.286
1314	57.2273	56	61.4717	52.9828
1315	118.039	268	146.643	89.4359
1316	60.5123	57	67.262	53.7626
1317	109.714	199	132.432	86.9952
1318	87.7031	118	94.1616	81.2447
1319	62.9805	70	74.9961	50.965
1320	89.9763	109	98.9829	80.9697
1321	61.3505	83	70.4703	52.2306
1322	76.6363	77	88.4579	64.8147
1323	74.6685	66	82.7225	66.6145
1324	77.6154	103	78.2067	77.024
1325	82.7357	81	91.1699	74.3016
1326	61.591	52	74.5006	48.6814
1327	59.5853	53	64.5216	54.649
1328	80.652	168	95.6686	65.6355
1329	75.8208	73	90.3098	61.3318
1330	99.2086	341	113.313	85.104
1331	98.7408	127	121.874	75.6077
1332	85.0824	142	85.7674	84.3975
1333	74.4347	94	77.5152	71.3541
1334	117.099	182	151.358	82.8399
1335	77.792	76	79.8137	75.7704
1336	71.0486	61	74.9728	67.1244
1337	67.1591	90	73.7283	60.5898
1338	72.0957	80	94.0657	50.1257
1339	85.3057	187	88.0128	82.5986
1340	112.425	237	126.786	98.0638
1341	54.8928	57	66.2319	43.5538
1342	68.7216	65	78.2237	59.2195
1343	83.2552	81	101.614	64.8959
1344	81.0939	91	85.5374	76.6504
1345	101.965	112	126.541	77.3898
1346	68.213	59	75.2512	61.1749
1347	82.6148	109	90.5707	74.6588
1348	81.4272	102	86.1763	76.6781
1349	82.6568	75	97.2268	68.0868
1350	76.7636	73	78.3769	75.1504
1351	77.3663	68	77.6417	77.091
1352	87.1795	113	100.009	74.3496
1353	73.5056	139	81.6189	65.3923
1354	78.3683	80	85.5004	71.2362
1355	61.0207	62	72.5345	49.5068
1356	60.4894	51	61.6525	59.3262
1357	75.0602	124	85.5965	64.5238
1358	75.2106	79	85.9206	64.5006
1359	78.7791	92	88.5413	69.0169
1360	60.1882	50	64.4856	55.8909
1361	78.4897	65	95.6798	61.2996
1362	71.4566	86	82.2956	60.6176
1363	61.6428	56	67.8254	55.4601
1364	89.744	151	100.193	79.2947
1365	84.8722	110	92.1302	77.6141
1366	77.5819	99	95.1276	60.0362
1367	68.1482	63	82.2198	54.0767
1368	97.7519	216	102.688	92.816
1369	89.5387	81	103.764	75.3131
1370	80.2568	92	89.9363	70.5774
1371	97.8082	191	98.4958	97.1206
1372	57.9007	52	65.3921	50.4092
1373	66.9788	58	76.1892	57.7684
1374	84.2849	97	92.0225	76.5472
1375	77.741	71	91.6997	63.7822
1376	91.3536	243	107.2	75.5072
1377	70.9209	72	77.3882	64.4536
1378	88.8837	137	99.92	77.8475
1379	100.114	121	131.112	69.1161
1380	79.1856	115	93.6522	64.7189
1381	81.4215	74	96.5644	66.2786
1382	117.738	300	149.389	86.0862
1383	65.8615	62	67.461	64.262
1384	79.1448	76	81.3005	76.9892
1385	86.1444	99	95.2914	76.9973
1386	65.6907	55	69.5598	61.8216
1387	85.0206	120	92.5307	77.5104
1388	104.929	190	125.282	84.5754
1389	62.0881	75	69.9041	54.2721
1390	85.5902	79	86.1823	84.9981
1391	89.7495	114	104.981	74.5177
1392	64.5013	58	75.216	53.7867
1393	65.8899	80	78.5755	53.2042
1394	73.9858	129	86.3997	61.572
1395	64.4402	57	67.7171	61.1633
1396	80.1539	154	87.7016	72.6062
1397	94.1575	210	104.712	83.6035
1398	85.7889	89	91.2918	80.286
1399	61.6745	51	65.0356	58.3135
1400	67.8864	83	83.5597	52.2131
1401	55.1606	50	60.8561	49.4652
1402	74.7482	67	81.8438	67.6525
1403	64.8121	68	69.9817	59.6425
1404	99.5748	137	118.092	81.0576
1405	88.5133	98	97.1045	79.9222
1406	77.7666	87	94.1465	61.3866
1407	58.3295	55	64.4527	52.2063
1408	76.7269	80	86.7614	66.6924
1409	92.5524	247	92.6457	92.4592
1410	86.272	97	106.126	66.4179
1411	79.2318	160	82.6507	75.8129
1412	89.4874	122	99.0341	79.9408
1413	71.32	102	84.9429	57.697
1414	104.039	205	115.982	92.0971
1415	58.5589	53	60.6878	56.43
1416	78.2812	81	84.3507	72.2118
1417	75.2363	89	75.3637	75.1088
1418	63.1484	50	64.6727	61.6241
1419	97.0328	138	97.2102	96.8555
1420	76.5993	184	81.2685	71.93
1421	71.8026	67	77.3383	66.2669
1422	66.312	66	76.0671	56.557
1423	80.9245	74	85.7641	76.0848
1424	70.041	64	71.6685	68.4136
1425	63.992	65	70.8939	57.09
1426	99.2684	160	101.964	96.5724
1427	71.3344	63	81.6948	60.9741
1428	61.8887	58	62.5366	61.2408
1429	77.113	98	91.6336	62.5925
1430	59.0859	50	64.8328	53.339
1431	78.5309	67	99.6699	57.3918
1432	74.6405	68	80.6701	68.6108
1433	69.325	62	82.7734	55.8767
1434	62.8946	55	64.0087	61.7805
1435	86.7818	101	100.148	73.4161
1436	69.5554	74	73.0869	66.0239
1437	56.6712	50	66.1941	47.1483
1438	95.3117	236	131.503	59.1203
1439	80.8835	80	86.328	75.439
1440	63.1689	62	70.3487	55.9891
1441	62.4571	63	64.7398	60.1744
1442	78.2134	443	93.4542	62.9725
1443	89.3421	161	104.607	74.0768
1444	62.7127	58	66.9963	58.4291
1445	65.2748	64	78.4739	52.0757
1446	76.6318	368	83.6953	69.5683
1447	74.9832	68	83.6241	66.3424
1448	90.0884	78	91.0578	89.119
1449	84.2051	178	98.3879	70.0223
1450	58.5207	67	65.689	51.3525
1451	85.4688	114	96.6613	74.2762
1452	60.1173	59	70.8384	49.3962
1453	90.7576	205	107.12	74.3948
1454	62.3131	50	69.7243	54.9019
1455	56.7932	71	66.361	47.2255
1456	104.61	218	120.185	89.0345
1457	73.666	89	76.6617	70.6702
1458	79.8941	111	87.8847	71.9035
1459	71.4611	75	87.0017	55.9205
1460	52.5613	50	56.6518	48.4708
1461	80.3896	73	88.3749	72.4044
1462	83.0645	136	99.5732	66.5559
1463	51.1671	79	56.6479	45.6864
1464	62.5982	95	73.733	51.4634
1465	96.0425	89	111.126	80.9585
1466	56.0831	50	60.1619	52.0042
1467	59.3118	51	68.5861	50.0374
1468	64.0826	93	66.9354	61.2297
1469	99.0693	112	113.705	84.4331
1470	78.2823	236	86.008	70.5565
1471	78.1759	78	92.1625	64.1892
1472	55.2419	53	56.3219	54.1619
1473	72.8467	76	86.0478	59.6455
1474	68.4165	82	74.5795	62.2535
1475	56.4798	51	65.2952	47.6645
1476	78.6941	74	88.1036	69.2846
1477	58.4887	52	63.6423	53.3351
1478	84.8897	152	99.6276	70.1517
1479	72.3904	69	74.4444	70.3363
1480	79.9355	156	83.5467	76.3243
1481	79.5065	99	84.7199	74.2931
1482	78.1164	80	84.5158	71.7171
1483	74.122	81	83.1112	65.1329
1484	68.5582	64	70.8882	66.2282
1485	78.169	73	88.1644	68.1737
1486	71.7336	71	74.6697	68.7975
1487	68.6834	61	83.0933	54.2736
1488	81.1402	233	86.1099	76.1706
1489	76.699	145	85.2667	68.1313
1490	64.1323	86	67.1117	61.1529
1491	59.4928	51	61.3414	57.6442
1492	62.8403	63	68.8531	56.8275
1493	64.6648	68	80.6264	48.7032
1494	55.4127	59	58.5685	52.2569
1495	65.1474	59	72.4412	57.8536
1496	72.5627	63	80.8444	64.2811
1497	80.8646	97	89.943	71.7862
1498	66.5964	58	69.5659	63.6269
1499	81.873	112	90.5107	73.2354
1500	67.4862	60	75.4246	59.5478
1501	64.568	68	84.0778	45.0583
1502	71.5557	78	79.6898	63.4216
1503	85.9573	94	94.413	77.5015
1504	66.1794	61	69.9096	62.4492
1505	79.4867	68	86.3522	72.6212
1506	99.3867	142	106.434	92.3399
1507	55.7485	63	72.3395	39.1575
1508	69.0661	57	70.6871	67.4451
1509	69.0883	68	78.8677	59.309
1510	69.6381	64	76.4173	62.8589
1511	70.6975	69	76.105	65.2901
1512	89.2894	217	91.2383	87.3405
1513	95.5036	267	132.766	58.2411
1514	56.251	96	62.568	49.934
1515	61.3472	65	64.1378	58.5566
1516	90.3659	129	108.913	71.8188
1517	58.9562	52	64.8399	53.0724
1518	66.9116	65	85.3155	48.5077
1519	62.1554	56	75.1888	49.1219
1520	82.1472	111	90.3872	73.9072
1521	71.4341	66	82.6894	60.1788
1522	51.6458	53	55.7163	47.5752
1523	58.9197	54	63.7667	54.0728
1524	95.2758	151	108.368	82.1836
1525	71.5728	62	87.8845	55.261
1526	104.026	229	108.619	99.4323
1527	57.0277	53	65.6144	48.4411
1528	72.1172	89	78.7817	65.4527
1529	70.9204	63	73.3583	68.4826
1530	91.1153	150	95.0649	87.1658
1531	92.1318	96	98.1769	86.0867
1532	84.7066	174	103.558	65.8547
1533	83.6765	88	88.9626	78.3904
1534	60.1748	50	61.2755	59.074
1535	62.3982	60	68.4499	56.3465
1536	63.3006	51	68.7722	57.829
1537	66.7322	66	69.1249	64.3394
1538	98.3542	227	121.614	75.0944
1539	67.8761	56	78.7505	57.0017
1540	67.8403	65	76.3096	59.371
1541	64.1976	57	72.1911	56.204
1542	57.6106	57	67.8293	47.3918
1543	75.1702	64	86.1054	64.2349
1544	107.761	226	118.185	97.3367
1545	79.6849	87	92.9844	66.3854
1546	79.2289	73	86.8778	71.5801
1547	91.0827	117	105.531	76.634
1548	69.111	63	83.047	55.175
1549	92.7974	142	97.4101	88.1847
1550	105.723	186	129.149	82.2963
1551	80.9859	112	83.0794	78.8923
1552	92.3407	388	102.865	81.8162
1553	61.8397	54	65.7414	57.9379
1554	62.16	68	65.0924	59.2276
1555	79.4833	77	84.542	74.4245
1556	71.385	61	90.6097	52.1604
1557	73.4284	81	76.8857	69.9711
1558	83.4239	86	93.0956	73.7522
1559	83.1453	79	93.9009	72.3896
1560	80.2378	95	87.3761	73.0996
1561	82.6166	91	90.5079	74.7254
1562	77.4732	81	88.9452	66.0011
1563	53.352	56	62.2517	44.4524
1564	100.946	148	120.808	81.084
1565	82.7508	127	96.6046	68.897
1566	63.0523	62	71.7982	54.3064
1567	59.9764	61	64.8658	55.0869
1568	51.1539	55	62.7886	39.5191
1569	53.8602	52	58.6219	49.0985
1570	75.9075	68	83.2432	68.5719
1571	70.059	79	86.0816	54.0363
1572	53.5136	52	55.7589	51.2683
1573	56.7659	53	65.0017	48.5302
1574	54.7545	56	61.1127	48.3964
1575	52.7479	61	63.5029	41.9929
1576	76.3036	85	80.7098	71.8974
1577	79.6283	82	94.2762	64.9803
1578	82.2014	123	85.8462	78.5566
1579	64.975	58	70.5461	59.4039
1580	71.2564	100	71.4067	71.1062
1581	54.2854	52	61.4084	47.1624
1582	63.921	50	67.1338	60.7082
1583	51.0744	52	54.4096	47.7392
1584	51.9396	59	64.1405	39.7388
1585	70.1596	70	70.7096	69.6096
1586	62.076	55	67.4945	56.6575
1587	63.3304	52	67.4204	59.2404
1588	62.5283	61	66.0164	59.0402
1589	107.02	178	123.719	90.322
1590	86.1929	90	87.3208	85.0651
1591	69.1649	61	73.9846	64.3453
1592	62.4987	58	64.8891	60.1082
1593	57.3145	64	62.9662	51.6628
1594	80.0044	74	84.8947	75.1141
1595	77.9085	101	93.5577	62.2592
1596	58.265	54	65.1982	51.3318
1597	45.5517	62	53.9782	37.1251
1598	56.9385	53	57.6557	56.2213
1599	61.6238	50	67.0327	56.2149
1600	74.8913	77	83.8036	65.9791
1601	64.346	77	71.959	56.733
1602	73.4218	67	79.2451	67.5984
1603	68.9015	60	81.5108	56.2921
1604	73.2128	73	75.0351	71.3905
1605	56.4277	40	60.5987	52.2566
1606	64.3963	56	64.5308	64.2617
1607	86.2494	173	94.4024	78.0965
1608	66.4572	733	72.4514	60.463
1609	71.7963	74	77.0694	66.5232
1610	72.2519	90	78.9499	65.5539
1611	80.6959	75	96.0472	65.3447
1612	59.0827	52	64.2545	53.9108
1613	63.0385	50	64.3796	61.6974
1614	61.6588	67	70.4615	52.8561
1615	63.891	56	68.8731	58.9089
1616	74.062	105	80.1296	67.9945
1617	62.4975	56	74.8961	50.0988
1618	57.4071	50	61.3835	53.4306
1619	65.8853	72	69.2403	62.5303
1620	48.3662	55	57.3232	39.4091
1621	57.4009	51	62.0129	52.7889
1622	55.8832	59	59.0826	52.6837
1623	73.9857	80	85.7034	62.2681
1624	73.0073	147	84.9204	61.0942
1625	82.4488	90	89.1932	75.7043
