# Supplementary material for: Full assembly of HIV-1 particles requires assistance of the membrane curvature factor IRSp53
Source: eLife. 2021 Jun 11;10:e67321. doi: 10.7554/eLife.67321 (PMC8260224; doi:10.7554/eLife.67321)
Supplement: Figure 3—source data 4. [file elife-67321-fig3-data4.xlsx]

## Sheet: IRTKS
Index	Size	# locs	Major axis	Minor axis
1	108.002	1994	129.297	86.7073
2	88.7101	930	96.9429	80.4773
3	69.5376	95	69.8112	69.2639
4	83.7634	3302	86.0732	81.4535
5	56.6898	545	62.2445	51.1351
6	95.7138	285	101.709	89.7187
7	341.175	2671	480.323	202.026
8	441.75	8990	669.358	214.143
9	260.337	2125	297.733	222.942
10	273.024	4158	354.587	191.462
11	266.662	1970	333.68	199.644
12	425.273	5949	549.451	301.095
13	78.0004	973	87.2374	68.7633
14	517.847	7269	689.087	346.607
15	326.9	3590	406.818	246.982
16	103.155	1463	121.805	84.5057
17	256.779	2539	422.153	91.4045
18	190.479	517	215.171	165.788
19	92.1266	388	95.5743	88.6788
20	86.315	254	98.9768	73.6533
21	303.592	2334	374.801	232.382
22	414.702	6959	526.843	302.56
23	374.247	14097	525.344	223.149
24	208.235	8858	257.23	159.241
25	114.565	488	139.06	90.0703
26	105.448	1716	109.152	101.744
27	197.843	1329	267.926	127.761
28	175.521	1396	201.099	149.943
29	193.748	850	274.824	112.672
30	85.981	433	91.7275	80.2345
31	88.4939	524	94.5745	82.4133
32	178.128	660	222.559	133.698
33	240.74	1698	282.957	198.523
34	126.787	2036	135.289	118.286
35	97.5945	360	106.141	89.0477
36	92.6992	324	96.3333	89.065
37	89.6581	1299	95.7562	83.5599
38	144.63	420	146.325	142.935
39	117.968	542	125.487	110.45
40	156.073	365	177.878	134.267
41	427.817	3092	656.494	199.14
42	232.172	2619	290.042	174.301
43	134.649	244	166.274	103.024
44	334.882	2569	454.186	215.578
45	443.297	3301	631.344	255.251
46	494.52	7536	694.2	294.839
47	251.031	7804	302.705	199.357
48	299.172	1756	428.821	169.524
49	257.34	3755	282.104	232.576
50	264.675	6149	339.9	189.45
51	123.552	6564	131.316	115.789
52	87.4548	321	96.591	78.3185
53	149.97	447	161.935	138.005
54	90.674	243	99.6362	81.7118
55	256.316	1073	315.906	196.725
56	88.4368	176	93.8802	82.9933
57	517.715	4730	635.982	399.448
58	197.353	1076	215.467	179.24
59	84.6968	281	95.112	74.2815
60	156.751	1561	219.168	94.334
61	118.843	611	154.681	83.0044
62	606.606	10996	866.25	346.963
63	85.5557	361	97.9208	73.1906
64	81.2172	225	87.1908	75.2436
65	97.7045	277	106.654	88.7552
66	99.4728	2260	103.937	95.0084
67	99.0832	5015	106.802	91.3647
68	102.694	199	118.965	86.4234
69	97.3754	268	109.706	85.0447
70	98.7147	244	106.539	90.8901
71	135.257	8863	144.731	125.783
72	87.2782	310	93.8565	80.7
73	158.774	786	225.509	92.0395
74	72.1636	307	81.76	62.5672
75	78.9821	332	84.6323	73.3319
76	99.1026	314	116.644	81.5607
77	85.3149	5477	90.8385	79.7914
78	126.363	15310	152.3	100.425
79	81.5059	209	93.0892	69.9225
80	153.577	1882	210.317	96.8384
81	111.539	376	146.838	76.2404
82	260.217	9637	393.008	127.427
83	87.6609	117	105.615	69.7064
84	380.256	5108	546.418	214.094
85	562.58	8996	740.464	384.696
86	83.1544	282	88.4898	77.819
87	97.8737	3403	100.767	94.9804
88	82.5821	541	93.3295	71.8348
89	143.051	4094	213.136	72.9653
90	64.2686	81	70.0116	58.5257
91	61.2498	8933	61.8997	60.5999
92	89.6148	795	91.9268	87.3028
93	109.502	6426	132.199	86.8054
94	87.7702	11460	93.0344	82.506
95	86.3733	3399	90.2901	82.4565
96	132.933	8690	175.772	90.094
97	483.993	7692	704.004	263.982
98	259.836	1577	319.919	199.753
99	77.2652	117	89.4341	65.0962
100	90.0002	333	90.168	89.8324
101	83.2168	112	97.2441	69.1895
102	252.248	1149	354.683	149.813
103	292.856	1798	402.326	183.386
104	104.31	148	111.414	97.2057
105	96.9316	235	117.539	76.3243
106	129.212	229	153.98	104.445
107	90.5942	510	107.67	73.5188
108	91.2416	314	96.6345	85.8486
109	103.013	1461	116.56	89.4651
110	274.657	1438	384.095	165.22
111	415.155	8213	588.272	242.038
112	153.669	611	170.589	136.749
113	455.733	2740	680.011	231.456
114	84.366	334	92.1039	76.6281
115	90.3857	559	95.1315	85.64
116	72.42	247	79.1721	65.6679
117	104.751	188	111.334	98.1688
118	113.963	3429	119.679	108.247
119	101.569	215	110.144	92.9942
120	99.3969	505	110.354	88.4401
121	92.88	216	117.079	68.681
122	121.47	695	160.859	82.0807
123	137.08	516	179.346	94.8144
124	112.208	1224	124.01	100.405
125	78.913	78	92.5727	65.2532
126	57.7232	85	68.0968	47.3497
127	83.8231	157	89.0263	78.6199
128	95.4046	1447	104.025	86.7842
129	67.2393	154	73.2904	61.1882
130	308.851	2296	434.168	183.535
131	252.317	2055	349.055	155.579
132	379.51	4688	569.128	189.891
133	89.3549	412	94.9322	83.7777
134	222.025	2113	244.122	199.928
135	221.605	1617	274.872	168.338
136	71.9185	93	77.2801	66.557
137	79.1754	90	86.0308	72.3199
138	162.152	348	184.836	139.469
139	79.3335	101	81.5656	77.1014
140	105.071	3211	116.016	94.1259
141	107.942	582	122.088	93.7965
142	88.0893	98	91.3433	84.8354
143	159.906	399	182.608	137.205
144	136.233	2015	183.533	88.932
145	89.9786	452	100.606	79.3512
146	149.96	881	157.179	142.741
147	204.974	626	263.918	146.029
148	92.9954	1024	103.612	82.3791
149	525.354	4659	793.134	257.574
150	246.178	1681	278.462	213.895
151	103.663	731	117.146	90.1803
152	132.459	1714	141.196	123.723
153	104.125	628	114.579	93.6716
154	70.1654	72	80.2877	60.0431
155	144.475	257	144.676	144.274
156	82.4749	485	83.3536	81.5961
157	141.467	1787	165.579	117.355
158	87.0994	280	98.5529	75.646
159	130.65	300	150.709	110.591
160	116.147	191	120.823	111.472
161	81.3214	207	93.2321	69.4108
162	87.7002	2253	91.2755	84.125
163	98.5888	136	117.382	79.7959
164	90.0274	1489	93.9809	86.0739
165	94.1634	329	101.576	86.7505
166	94.4253	196	109.371	79.4795
167	117.294	500	139.015	95.5737
168	161.442	346	191.397	131.487
169	139.694	330	180.625	98.7624
170	109.073	149	116.604	101.542
171	85.9411	84	94.0734	77.8088
172	182.921	464	232.512	133.33
173	175.476	666	205.415	145.536
174	190.665	553	246.94	134.39
175	223.607	1190	285.912	161.302
176	86.1475	151	101.26	71.0349
177	224.738	1236	276.973	172.503
178	93.8362	115	105.783	81.8898
179	149.559	507	176.257	122.862
180	88.835	115	94.7203	82.9498
181	95.9977	782	99.7492	92.2462
182	68.0768	60	68.2598	67.8937
183	73.286	67	79.2608	67.3112
184	83.6862	617	86.6026	80.7698
185	267.448	1500	387.687	147.209
186	165.207	727	186.616	143.798
187	225.663	2136	244.812	206.515
188	126.987	601	160.139	93.8361
189	173.989	842	225.415	122.564
190	77.4124	84	82.6927	72.132
191	119.602	505	124.834	114.37
192	126.603	1003	141.763	111.443
193	160.106	474	175.465	144.748
194	192.166	824	227.923	156.41
195	237.621	1100	299.349	175.892
196	79.07	541	84.0523	74.0876
197	212.137	1545	277.625	146.649
198	239.962	1606	274.397	205.526
199	106.143	2995	108.197	104.088
200	80.5213	148	90.5714	70.4712
201	70.2123	197	74.3028	66.1218
202	161.503	592	186.088	136.917
203	107.821	327	117.093	98.55
204	138.79	354	161.179	116.4
205	94.3246	912	103.904	84.7449
206	151.982	1036	170.036	133.928
207	70.9594	78	76.32	65.5987
208	92.83	112	104.145	81.5145
209	99.3257	492	103.477	95.1747
210	91.5828	255	98.1582	85.0073
211	89.6312	361	92.3021	86.9603
212	77.3459	1316	81.5773	73.1145
213	96.4429	135	97.8898	94.9961
214	98.8899	188	110.511	87.2684
215	85.1389	101	92.5597	77.718
216	165.354	1029	195.224	135.484
217	79.5374	98	92.6505	66.4243
218	84.0492	82	99.6722	68.4263
219	91.7108	145	106.862	76.5599
220	121.588	1428	142.082	101.095
221	96.408	221	101.939	90.8769
222	200.316	844	261.533	139.1
223	196.62	831	205.09	188.149
224	93.0903	273	100.79	85.3912
225	86.4949	152	100.936	72.0538
226	113.111	717	139.036	87.1859
227	116.666	189	138.137	95.1953
228	94.7554	535	96.7795	92.7314
229	277.563	1197	281.777	273.349
230	268.31	1476	387.361	149.258
231	231.634	1074	301.746	161.521
232	114.199	588	129.795	98.6025
233	103.87	294	114.915	92.8253
234	263.306	1034	323.766	202.845
235	80.0281	81	86.3614	73.6949
236	72.8517	67	79.0884	66.615
237	66.4179	325	67.608	65.2277
238	89.889	192	96.7394	83.0386
239	76.8711	114	88.3253	65.4169
240	87.0052	247	98.7757	75.2346
241	77.3567	99	83.6749	71.0385
242	105.382	301	130.886	79.8781
243	128.123	490	133.473	122.773
244	88.8924	128	92.8935	84.8912
245	171.039	388	205.074	137.004
246	91.1976	526	100.628	81.7673
247	99.8483	389	111.523	88.1739
248	78.2178	82	82.44	73.9956
249	82.4053	78	90.2573	74.5534
250	145.291	567	150.586	139.995
251	170.246	723	178.241	162.25
252	334.98	1845	443.655	226.306
253	149.699	419	193.756	105.642
254	64.5343	58	68.3193	60.7493
255	120.138	200	140.882	99.3945
256	261.805	1168	338.765	184.844
257	151.611	514	156.521	146.7
258	122.312	718	126.045	118.579
259	89.1847	525	92.4107	85.9586
260	86.9704	162	95.1402	78.8007
261	174.47	435	199.87	149.07
262	126.467	218	136.26	116.674
263	142.323	1045	197.972	86.6741
264	91.0761	575	96.662	85.4902
265	93.0154	145	105.555	80.476
266	213.057	622	294.109	132.006
267	95.2825	730	97.3213	93.2437
268	110.689	221	112.588	108.789
269	121.512	209	126.845	116.179
270	87.338	100	93.5714	81.1046
271	97.2147	169	103.085	91.3449
272	100.265	1456	109.123	91.407
273	350.02	2003	441.961	258.079
274	99.8662	467	106.075	93.6574
275	80.1392	319	85.4265	74.8519
276	93.5942	548	108.122	79.0664
277	79.0975	429	80.9274	77.2676
278	169.557	1035	217.403	121.711
279	81.3558	86	81.8879	80.8238
280	93.5956	170	93.8982	93.2931
281	101.457	253	101.897	101.017
282	100.32	264	108.66	91.9803
283	89.7731	179	94.6979	84.8483
284	68.6348	91	75.5313	61.7384
285	86.9472	232	104.865	69.0295
286	78.6649	86	85.7654	71.5644
287	139.876	372	164.538	115.214
288	84.1668	104	87.704	80.6296
289	246.011	730	287.953	204.069
290	94.4776	1188	101.918	87.0377
291	224.729	1580	315.878	133.58
292	282.078	1358	348.359	215.798
293	71.237	250	80.7741	61.6999
294	84.9704	227	91.2362	78.7046
295	207.214	549	266.631	147.796
296	83.9141	87	90.0919	77.7362
297	93.7309	175	95.884	91.5778
298	74.9377	1159	75.3107	74.5647
299	175.845	5121	243.955	107.734
300	148.574	297	159.115	138.034
301	146.992	1014	164.661	129.322
302	130.903	402	137.71	124.095
303	78.7857	106	83.5426	74.0288
304	92.658	136	95.2903	90.0257
305	103.574	131	114.093	93.0549
306	81.6733	97	85.5773	77.7694
307	89.4457	1051	94.7618	84.1296
308	92.4613	101	106.488	78.4347
309	166.991	722	251.732	82.2486
310	92.5952	208	101.591	83.5993
311	72.0103	238	72.8239	71.1966
312	95.8367	612	105.108	86.5657
313	82.5343	120	85.1308	79.9378
314	243.024	1026	247.936	238.113
315	76.2452	96	81.3536	71.1367
316	120.77	853	142.218	99.3211
317	99.5044	558	102.667	96.342
318	88.2682	336	98.8567	77.6797
319	108.655	259	118.846	98.4644
320	82.9791	223	87.6637	78.2945
321	100.633	620	100.683	100.583
322	278.011	1924	400.512	155.511
323	96.3987	264	98.4923	94.3052
324	277.89	984	390.468	165.312
325	97.1877	206	105.405	88.97
326	99.5886	211	111.14	88.0372
327	121.022	292	130.768	111.275
328	91.6115	113	94.3297	88.8932
329	163.486	1502	197.288	129.684
330	83.5189	412	88.9535	78.0843
331	146	571	162.556	129.444
332	83.6294	164	92.6639	74.595
333	189.748	570	234.94	144.557
334	82.9559	89	94.454	71.4579
335	83.3168	204	93.3744	73.2591
336	98.5524	145	112.078	85.0263
337	68.7979	65	69.4772	68.1185
338	75.1498	107	76.4857	73.8139
339	75.9727	156	82.2768	69.6686
340	210.338	697	268.793	151.884
341	159.62	756	185.724	133.516
342	149.668	488	157.402	141.934
343	133.97	461	157.014	110.926
344	88.2712	398	101.555	74.9878
345	87.7653	513	91.0569	84.4737
346	84.2745	536	84.7174	83.8316
347	258.339	1166	353.469	163.209
348	85.1775	453	91.1429	79.2122
349	67.8959	64	69.065	66.7268
350	83.7851	149	84.7578	82.8124
351	80.6752	138	84.2775	77.0728
352	70.6543	66	70.6705	70.6382
353	108.282	377	113.771	102.792
354	117.895	527	153.074	82.716
355	65.2687	60	70.0843	60.453
356	249.489	1213	360.094	138.884
357	92.7761	128	108.555	76.9971
358	103.37	120	113.703	93.0375
359	163.225	516	178.93	147.52
360	169.269	573	206.977	131.56
361	124.085	181	152.878	95.2913
362	85.8108	630	89.3292	82.2924
363	122.214	200	127.731	116.696
364	124.403	271	133.581	115.226
365	243.067	2236	299.148	186.986
366	112.846	424	120.318	105.374
367	69.6503	58	74.6089	64.6917
368	123.966	314	148.435	99.4981
369	65.0395	61	71.6301	58.4489
370	89.6431	107	94.927	84.3593
371	95.6834	294	106.32	85.0469
372	74.3156	75	80.4901	68.141
373	96.84	534	104.627	89.0528
374	82.2063	163	83.9046	80.508
375	59.8668	50	66.0838	53.6498
376	119.697	323	124.155	115.239
377	82.4512	189	89.8463	75.0561
378	121.119	1206	129.759	112.48
379	116.061	173	128.853	103.27
380	193.784	1031	238.234	149.333
381	98.7515	152	106.415	91.0878
382	229.645	656	288.931	170.36
383	85.4711	98	102.247	68.6957
384	80.6607	468	85.12	76.2013
385	195.802	1120	300.478	91.1258
386	99.191	273	108.991	89.3913
387	226.091	1144	323.043	129.139
388	60.2343	50	62.4361	58.0324
389	76.4368	94	85.5604	67.3131
390	122.774	235	132.847	112.702
391	183.026	2783	213.635	152.418
392	79.0161	98	82.9941	75.0381
393	74.4389	81	76.8086	72.0693
394	112.261	475	120.73	103.792
395	79.7454	78	89.7062	69.7846
396	96.9488	333	128.567	65.3303
397	68.7359	74	71.1257	66.346
398	64.3039	59	68.9665	59.6413
399	103.944	153	120.599	87.2888
400	112.611	526	118.766	106.457
401	116.325	307	129.519	103.132
402	99.4532	785	103.797	95.1099
403	59.7996	51	62.5108	57.0884
404	76.0455	71	99.3213	52.7697
405	114.149	249	122.691	105.607
406	99.2176	122	112.916	85.5188
407	171.702	552	186.928	156.476
408	116.514	236	121.122	111.906
409	149.577	308	163.05	136.104
410	131.392	443	136.154	126.631
411	137.234	374	156.27	118.198
412	98.0148	224	109.75	86.28
413	99.9932	142	108.06	91.9261
414	99.5757	149	105.274	93.8773
415	129.548	200	152.654	106.442
416	85.646	109	95.4529	75.839
417	85.3079	75	106.215	64.4013
418	87.0349	657	89.6929	84.3769
419	96.7458	163	99.4346	94.0571
420	72.8969	89	74.0135	71.7802
421	64.5286	318	65.8998	63.1574
422	164.044	667	188.629	139.459
423	95.1853	156	96.9051	93.4654
424	157.64	643	169.775	145.504
425	114.738	355	123.719	105.757
426	104.076	239	106.583	101.569
427	89.0825	322	97.2773	80.8877
428	133.715	291	145.305	122.125
429	153.885	338	184.65	123.12
430	212.403	773	253.947	170.859
431	90.8916	83	96.1499	85.6334
432	78.0513	78	81.056	75.0466
433	180.271	1002	250.351	110.19
434	98.458	161	102.006	94.9095
435	63.4486	50	67.6749	59.2224
436	152.527	508	173.774	131.281
437	96.7991	364	100.639	92.9592
438	132.915	477	143.575	122.256
439	106.959	495	134.124	79.7942
440	95.7272	892	108.804	82.6506
441	72.6265	110	82.0752	63.1778
442	75.2092	186	78.2097	72.2087
443	106.333	358	108.993	103.674
444	184.222	545	200.518	167.926
445	84.4559	103	98.7633	70.1484
446	139.178	377	151.593	126.763
447	73.549	273	76.9518	70.1461
448	91.2606	117	92.5881	89.933
449	163.159	513	189.231	137.087
450	116.055	178	129.437	102.672
451	94.5275	179	97.9501	91.105
452	55.3344	140	58.4122	52.2568
453	103.763	220	111.047	96.4794
454	155.124	639	207.896	102.352
455	88.542	98	96.8461	80.2379
456	77.7523	215	78.2972	77.2074
457	84.947	112	93.4493	76.4447
458	100.782	191	112.578	88.9864
459	79.2422	170	85.8208	72.6635
460	154.399	360	179.921	128.876
461	88.3765	263	91.2818	85.4713
462	86.2392	107	88.242	84.2364
463	228.968	1672	261.145	196.791
464	165.519	347	192.978	138.061
465	171.557	410	234.967	108.146
466	87.1418	155	101.063	73.2201
467	120.238	252	122.89	117.586
468	131.98	253	149.319	114.641
469	111.676	181	116.685	106.666
470	122.643	376	133.529	111.756
471	189.254	805	207.707	170.802
472	100.506	252	104.551	96.4612
473	59.9245	79	63.5374	56.3117
474	77.0946	220	87.1987	66.9904
475	81.7541	135	92.2664	71.2418
476	101.268	1057	112.677	89.8585
477	114.449	2748	156.899	71.9985
478	121.195	208	143.727	98.6626
479	84.0677	103	87.8042	80.3312
480	73.5606	81	78.0377	69.0835
481	85.7647	72	102.684	68.8454
482	107.319	150	111.115	103.523
483	104.762	147	118.6	90.9248
484	240.741	882	364.24	117.241
485	83.965	233	88.0546	79.8755
486	63.5456	76	68.2278	58.8633
487	90.6762	3465	98.9918	82.3606
488	84.3416	162	87.0094	81.6737
489	97.5646	227	103.055	92.074
490	169.731	419	203.966	135.496
491	75.4027	209	78.688	72.1175
492	111.853	253	137.998	85.7091
493	156.693	917	170.632	142.755
494	85.8875	430	94.2608	77.5141
495	138.924	498	190.384	87.4642
496	99.5671	141	117.412	81.7222
497	74.7927	74	79.9548	69.6306
498	121.723	369	141.512	101.934
499	89.6722	84	98.5615	80.7828
500	172.924	868	200.352	145.496
501	72.8432	70	86.7645	58.922
502	163.908	2673	170.452	157.364
503	99.7007	325	116.346	83.0556
504	188.087	783	229.901	146.274
505	85.4098	102	92.7909	78.0286
506	171.333	393	209.951	132.716
507	83.6298	340	92.1122	75.1475
508	156.124	654	167.92	144.328
509	70.0562	190	73.4154	66.697
510	126.935	249	131.143	122.726
511	130.677	355	141.741	119.614
512	103.966	155	116.597	91.3356
513	95.7806	156	104.64	86.9207
514	141.842	260	154.131	129.553
515	120.615	231	122.039	119.191
516	110.465	257	116.021	104.909
517	92.1914	113	102.991	81.392
518	91.3225	132	94.8139	87.831
519	86.7577	98	89.0057	84.5097
520	103.672	765	104.989	102.355
521	77.0206	111	87.8712	66.17
522	68.9168	73	77.6877	60.1459
523	86.4647	130	96.2927	76.6366
524	109.111	789	122.112	96.1103
525	91.4763	139	99.8074	83.1451
526	153.335	1143	203.988	102.682
527	118.167	211	130.013	106.321
528	78.9225	2258	86.5156	71.3294
529	91.3122	125	94.9598	87.6646
530	74.1959	418	75.1391	73.2528
531	95.1849	145	102.356	88.0138
532	147.339	267	174.372	120.306
533	76.0974	96	89.0436	63.1513
534	88.876	228	95.9523	81.7997
535	69.3785	1208	72.0681	66.6888
536	112.792	226	119.573	106.011
537	71.9522	114	75.5487	68.3557
538	166.282	539	181.839	150.724
539	126.415	868	137.927	114.902
540	160.551	753	171.537	149.564
541	79.9747	103	88.692	71.2575
542	88.3579	140	91.257	85.4588
543	123.17	216	147.622	98.718
544	75.0965	123	82.5293	67.6637
545	100.211	342	107.43	92.9918
546	103.411	473	108.564	98.2581
547	87.2194	406	89.8111	84.6276
548	103.499	588	112.37	94.6283
549	80.7286	125	90.4427	71.0145
550	105.428	141	123.566	87.2895
551	101.777	179	109.514	94.0392
552	83.8699	89	84.6638	83.0759
553	88.2269	155	91.3202	85.1337
554	113.28	160	128.113	98.4472
555	155.045	413	173.219	136.871
556	84.9123	130	88.1368	81.6879
557	195.491	782	283.35	107.632
558	155.446	594	176.06	134.832
559	99.567	140	117.659	81.4747
560	83.9961	85	90.9955	76.9966
561	125.56	195	141.75	109.37
562	72.0932	153	82.5473	61.6391
563	100.633	128	111.725	89.542
564	80.1572	91	85.8687	74.4458
565	121.357	258	151.66	91.054
566	116.29	181	123.3	109.281
567	164.327	666	182.973	145.681
568	104.904	154	106.322	103.486
569	111.036	434	119.16	102.912
570	58.977	50	59.2443	58.7097
571	95.2024	432	102.044	88.3607
572	121.524	1529	129.024	114.024
573	84.0858	141	90.79	77.3816
574	88.0736	652	99.7845	76.3626
575	175.503	706	196.364	154.641
576	79.6818	70	86.6491	72.7145
577	82.9206	135	91.987	73.8542
578	60.7848	50	60.978	60.5916
579	90.9573	106	95.1154	86.7993
580	91.9488	87	106.572	77.3257
581	112.994	326	117.653	108.335
582	61.4853	57	64.4786	58.4919
583	106.632	155	115.556	97.7074
584	108.958	153	121.187	96.7289
585	122.313	260	131.963	112.662
586	86.6212	185	89.101	84.1415
587	95.6523	145	105.723	85.5819
588	78.4497	75	84.7229	72.1765
589	90.1707	211	95.0559	85.2855
590	165.435	445	196.768	134.102
591	90.4223	356	97.7534	83.0912
592	74.9748	108	75.3639	74.5858
593	98.5807	222	102.846	94.315
594	74.2929	81	82.7716	65.8142
595	134.941	242	159.307	110.575
596	87.3854	103	94.2219	80.5488
597	112.184	725	124.637	99.7309
598	85.7734	206	92.805	78.7419
599	167.479	1915	228.561	106.398
600	75.4602	715	78.9389	71.9815
601	113.481	201	118.056	108.906
602	168.316	530	195.225	141.408
603	92.0999	290	102.181	82.0191
604	103.177	281	122.157	84.1963
605	127.828	480	183.677	71.9783
606	88.2189	155	93.4025	83.0354
607	132.144	197	141.237	123.052
608	107.594	226	137.146	78.0411
609	76.2711	302	82.8623	69.6798
610	116.844	188	131.32	102.369
611	68.2187	93	71.5558	64.8816
612	83.3798	153	92.7657	73.9939
613	69.9251	145	80.8434	59.0067
614	78.6133	76	95.9556	61.2709
615	110.854	153	127.47	94.2375
616	99.2476	794	110.817	87.6783
617	113.065	340	122.63	103.501
618	96.445	126	96.7917	96.0982
619	203.368	590	266.736	140
620	93.3356	336	101.639	85.0326
621	63.9528	55	66.9701	60.9354
622	135.446	381	165.415	105.477
623	167.232	517	195.543	138.921
624	79.5884	171	86.6275	72.5494
625	80.3949	75	91.0748	69.7149
626	71.5636	65	74.9075	68.2197
627	70.1478	66	78.8347	61.4608
628	94.0856	110	103.765	84.406
629	67.3641	60	68.8711	65.8571
630	126.136	489	138.304	113.968
631	104.024	168	120.107	87.9407
632	92.8019	153	97.8676	87.7363
633	79.5221	87	97.5451	61.4992
634	100.561	479	115.402	85.7191
635	117.195	277	155.783	78.6069
636	86.9785	153	88.818	85.1389
637	90.7316	125	104.307	77.1559
638	137.067	289	148.488	125.646
639	86.2298	142	95.5965	76.863
640	92.7726	723	95.5834	89.9617
641	90.3556	100	93.6493	87.0619
642	189.341	516	230.314	148.368
643	101.61	354	102.27	100.95
644	92.1521	237	92.2296	92.0746
645	105.414	212	108.412	102.415
646	71.7199	68	73.9925	69.4474
647	85.3221	129	97.5888	73.0553
648	156.915	507	173.564	140.267
649	78.0873	77	91.7039	64.4707
650	90.7484	106	97.71	83.7868
651	100.621	131	112.903	88.3386
652	74.9315	810	78.4577	71.4053
653	160.401	370	184.526	136.275
654	78.3455	278	88.7046	67.9864
655	105.364	255	135.677	75.0509
656	84.9561	93	90.698	79.2141
657	125.151	510	135.606	114.696
658	123.647	233	134.981	112.313
659	78.1349	104	97.726	58.5439
660	66.6041	64	72.0543	61.1539
661	178.343	1434	191.336	165.349
662	80.3912	89	82.2974	78.485
663	222.936	1106	305.773	140.099
664	79.2942	90	79.9045	78.6839
665	69.0992	768	71.188	67.0104
666	88.484	237	97.2689	79.699
667	75.7053	81	80.1622	71.2485
668	91.1629	117	99.0181	83.3078
669	105.104	236	108.564	101.643
670	100.811	135	116.2	85.422
671	82.3625	89	89.6732	75.0518
672	106.303	139	118.797	93.8094
673	126.235	738	127.84	124.63
674	89.1002	163	102.833	75.3674
675	67.5277	103	69.3926	65.6627
676	85.7894	100	86.8564	84.7225
677	86.5873	738	93.5411	79.6335
678	84.338	87	101.339	67.3372
679	67.5447	63	72.8185	62.271
680	78.9134	526	86.6817	71.1451
681	98.9285	127	110.115	87.7417
682	101.814	394	110.012	93.6159
683	198.569	478	287.003	110.136
684	112.488	142	116.418	108.558
685	101.366	325	109.276	93.4565
686	143.74	391	166.305	121.175
687	78.987	80	89.6508	68.3232
688	82.3348	128	87.9692	76.7004
689	89.1958	132	99.6621	78.7294
690	82.6016	161	90.9445	74.2587
691	87.5221	137	97.655	77.3892
692	146.574	263	175.449	117.699
693	83.5025	126	94.8743	72.1308
694	88.573	414	97.3105	79.8355
695	92.2479	402	96.3333	88.1625
696	88.4533	225	89.3264	87.5803
697	120.289	204	137.877	102.702
698	74.6212	72	80.3142	68.9282
699	81.9117	130	90.9008	72.9225
700	75.263	244	85.0064	65.5196
701	93.1425	125	99.7516	86.5334
702	83.6586	218	92.5463	74.7709
703	75.6898	69	77.4939	73.8856
704	63.0272	63	65.9733	60.081
705	115.069	210	140.878	89.259
706	70.2085	69	76.1216	64.2954
707	154.492	334	200.611	108.374
708	87.7627	100	90.7722	84.7533
709	91.2448	99	103.999	78.4901
710	82.064	638	86.6722	77.4558
711	87.3833	180	98.608	76.1587
712	61.4728	92	71.3185	51.6271
713	55.1904	51	57.8268	52.5541
714	93.0484	275	98.9936	87.1032
715	93.0349	136	107.905	78.1645
716	72.7401	121	79.8225	65.6576
717	97.7843	264	100.606	94.9623
718	65.8044	58	69.6496	61.9592
719	92.9738	852	96.1783	89.7693
720	110.33	183	111.087	109.572
721	131.134	330	142.591	119.678
722	84.6318	240	92.7077	76.5559
723	75.4411	93	83.3771	67.5051
724	97.6832	438	104.028	91.3384
725	129.736	321	137.884	121.587
726	138.185	470	145.613	130.757
727	69.3992	65	76.0994	62.699
728	123.001	184	143.091	102.912
729	109.93	328	110.077	109.783
730	107.698	349	108.339	107.057
731	92.5307	115	95.4369	89.6245
732	108.819	248	117.734	99.9032
733	89.8029	189	107.428	72.1779
734	112.435	172	123.557	101.313
735	69.632	69	73.0979	66.1662
736	85.9228	93	90.9091	80.9366
737	78.0207	117	82.7768	73.2646
738	136.027	439	141.998	130.055
739	75.4777	90	85.2147	65.7407
740	71.6064	63	85.3648	57.8481
741	112.604	188	118.429	106.778
742	108.192	161	120.997	95.387
743	111.824	314	117.775	105.872
744	60.4055	52	63.1056	57.7054
745	85.2534	248	88.9516	81.5552
746	89.6171	302	99.6915	79.5427
747	71.5775	684	78.7877	64.3672
748	113.221	174	113.25	113.191
749	87.7723	204	95.268	80.2766
750	122.136	650	142.105	102.166
751	106.491	188	110.579	102.404
752	112.369	167	123.175	101.563
753	89.7542	86	102.202	77.3067
754	104.228	406	117.053	91.4025
755	113.86	256	124.144	103.575
756	109.332	154	111.956	106.708
757	87.9071	102	105.207	70.6072
758	94.0333	318	97.035	91.0317
759	90.5141	90	101.536	79.4923
760	88.9412	169	94.5012	83.3812
761	92.6073	878	99.5562	85.6584
762	100.82	141	102.623	99.016
763	103.079	146	109.402	96.7554
764	86.1465	134	94.3746	77.9184
765	136.599	540	148.692	124.507
766	103.776	128	106.211	101.341
767	81.4582	171	90.7178	72.1986
768	126.605	319	132.648	120.561
769	137.489	675	149.13	125.849
770	92.7163	132	99.8329	85.5996
771	113.309	537	116.662	109.957
772	91.0525	109	97.1139	84.9911
773	91.8149	115	106.505	77.1245
774	182.933	420	223.479	142.388
775	111.703	281	118.116	105.29
776	86.4893	289	90.8653	82.1133
777	78.7493	122	86.0285	71.47
778	148.26	1140	219.31	77.209
779	125.79	229	128.276	123.304
780	76.222	91	82.169	70.2749
781	112.085	156	116.637	107.533
782	89.3076	113	108.971	69.6447
783	114.971	330	133.008	96.9328
784	83.4042	80	91.9984	74.8101
785	64.1491	53	67.9146	60.3835
786	137.9	795	147.053	128.748
787	74.7741	145	75.9156	73.6326
788	80.2861	338	85.3107	75.2615
789	84.1694	86	91.5342	76.8046
790	73.858	66	86.0833	61.6326
791	68.7498	92	77.2928	60.2069
792	69.0051	67	73.8995	64.1107
793	99.4839	147	104.366	94.6023
794	107.118	356	113.696	100.54
795	94.1141	140	95.8578	92.3704
796	77.1049	134	85.4486	68.7612
797	78.1514	142	90.4531	65.8497
798	65.9457	61	69.8384	62.0529
799	76.3814	306	81.5389	71.2239
800	71.8164	147	79.3218	64.3111
801	84.2535	835	89.5084	78.9987
802	106.047	267	114.29	97.8036
803	154.222	574	158.121	150.322
804	122.899	205	139.061	106.737
805	109.365	559	117.049	101.681
806	64.4413	103	69.2294	59.6532
807	92.9456	1487	100.712	85.1795
808	141.002	330	160.973	121.031
809	88.7308	105	102.578	74.8834
810	73.6743	137	81.0961	66.2525
811	75.3267	361	78.3356	72.3178
812	97.0202	158	106.963	87.0778
813	80.5506	88	85.529	75.5723
814	79.8581	323	85.3829	74.3333
815	64.9328	60	65.4374	64.4281
816	73.2887	78	75.3897	71.1876
817	84.393	109	87.0637	81.7224
818	87.9486	478	88.6626	87.2346
819	79.6284	164	87.4979	71.7589
820	142.236	318	175.675	108.798
821	105.758	438	111.74	99.7762
822	101.805	138	110.957	92.6521
823	91.3181	108	99.7692	82.8669
824	88.2266	383	93.335	83.1181
825	127.609	565	135.647	119.57
826	70.5833	68	73.6904	67.4762
827	132.968	333	135.008	130.927
828	94.4184	148	99.1177	89.719
829	84.6867	203	90.1881	79.1853
830	92.4995	340	101.103	83.8963
831	74.888	93	85.8013	63.9747
832	99.6459	489	120.352	78.9393
833	121.582	200	122.882	120.281
834	106.857	285	116.325	97.3887
835	92.3914	87	96.9857	87.7972
836	99.1185	314	101.687	96.5498
837	110.442	150	126.871	94.0124
838	93.8764	374	99.5834	88.1693
839	93.5241	302	100.83	86.2178
840	83.5913	140	96.7409	70.4417
841	73.6098	76	89.5533	57.6663
842	79.1186	72	79.7248	78.5125
843	84.2448	333	98.3428	70.1468
844	146.476	249	186.987	105.964
845	79.0023	207	86.5586	71.4459
846	90.2828	206	106.09	74.476
847	76.4677	67	86.8639	66.0714
848	94.3318	111	99.4143	89.2494
849	89.9584	160	109.511	70.4057
850	89.3542	91	96.3823	82.3261
851	71.4972	77	73.7492	69.2453
852	83.0766	119	87.3366	78.8165
853	121.755	306	136.987	106.523
854	90.0735	663	100.018	80.1289
855	73.4181	116	76.2971	70.5391
856	129.548	1589	155.163	103.933
857	63.2887	211	64.798	61.7793
858	96.7681	422	100.956	92.5804
859	87.8185	92	98.0011	77.6359
860	80.5816	79	84.7981	76.3651
861	87.312	424	88.3435	86.2804
862	97.7524	256	105.089	90.4158
863	113.017	1718	122.884	103.149
864	101.415	144	110.955	91.8741
865	84.7209	227	95.3624	74.0794
866	82.3916	86	88.6122	76.1709
867	82.3493	846	86.2628	78.4358
868	62.1706	50	68.3406	56.0006
869	148.217	408	155.539	140.895
870	87.6455	278	93.848	81.443
871	87.8376	90	107.541	68.1344
872	78.3751	196	81.2221	75.528
873	95.3965	133	107.531	83.2624
874	83.9127	93	85.1351	82.6903
875	66.5945	65	78.8074	54.3817
876	76.5416	79	84.6705	68.4127
877	136.369	378	152.991	119.748
878	96.4233	442	100.151	92.696
879	105.407	200	114.521	96.2932
880	85.4829	100	101.212	69.754
881	77.6748	143	87.3311	68.0184
882	101.917	213	102.534	101.301
883	89.3266	216	98.9014	79.7519
884	75.5925	118	80.6369	70.5481
885	176.522	585	208.387	144.657
886	97.2001	112	102.079	92.3217
887	109.38	144	113.099	105.662
888	95.4887	296	98.7515	92.226
889	82.9207	94	97.3943	68.4471
890	139.317	523	160.822	117.812
891	76.7755	272	84.0895	69.4615
892	89.2552	425	91.3049	87.2055
893	88.8296	127	95.6281	82.031
894	85.3238	201	93.9507	76.697
895	83.241	2606	88.1148	78.3672
896	147.981	486	155.454	140.508
897	60.1005	53	63.2599	56.9412
898	86.4069	100	93.7242	79.0897
899	124.878	194	140.9	108.857
900	107.238	189	114.827	99.6503
901	96.0723	126	102.614	89.5303
902	83.4164	456	87.9048	78.928
903	96.4168	198	96.9477	95.8859
904	137.315	414	174.819	99.8108
905	81.7184	108	89.514	73.9228
906	104.648	431	106.424	102.872
907	88.3955	307	92.221	84.5701
908	102.134	116	118.153	86.1149
909	85.2865	527	96.4219	74.1511
910	106.054	327	118.189	93.9201
911	78.7451	99	83.7483	73.742
912	118.67	162	134.608	102.731
913	72.2299	65	72.5961	71.8638
914	86.6225	90	100.11	73.1354
915	81.0735	88	87.1139	75.0331
916	144.209	486	153.371	135.046
917	72.8627	518	74.221	71.5045
918	83.1828	99	93.4878	72.8777
919	98.6248	134	110.912	86.3378
920	98.484	272	104.292	92.6763
921	102.463	221	116.965	87.9617
922	80.8663	75	89.4554	72.2772
923	105.465	385	112.563	98.3662
924	52.3872	57	54.0355	50.7388
925	92.4755	412	100.22	84.7314
926	92.8705	108	96.1768	89.5642
927	103.257	223	106.18	100.333
928	149.209	500	154.829	143.589
929	93.1708	161	103.744	82.5974
930	88.7532	1221	92.9006	84.6058
931	112.468	158	124.721	100.216
932	84.1693	97	85.0703	83.2682
933	100.135	132	110.69	89.5805
934	177.069	468	214.068	140.07
935	85.389	138	89.7559	81.0221
936	142.728	1225	171.315	114.142
937	82.7827	371	86.4227	79.1427
938	78.351	107	90.2503	66.4517
939	84.9257	78	93.7771	76.0743
940	98.456	146	108.149	88.7634
941	67.7507	123	73.6107	61.8907
942	104.972	159	112.352	97.5908
943	134.787	645	142.431	127.142
944	71.2793	64	76.0233	66.5353
945	87.0035	129	98.5206	75.4863
946	84.2729	89	94.0295	74.5162
947	80.6085	160	90.715	70.502
948	110.445	558	139.115	81.775
949	80.3952	204	83.8473	76.9431
950	65.9502	55	69.3484	62.5519
951	89.2207	140	105.944	72.4971
952	82.6276	124	92.2093	73.046
953	83.6755	338	86.8197	80.5313
954	76.6366	73	83.7436	69.5296
955	124.627	296	170.617	78.6365
956	83.5054	503	87.9709	79.0399
957	64.9472	62	67.1826	62.7118
958	103.737	176	120.075	87.3985
959	135.908	375	147.382	124.433
960	69.5519	67	69.6471	69.4568
961	80.5361	100	93.0003	68.072
962	107.346	148	110.692	103.999
963	57.6045	144	60.4625	54.7466
964	114.835	251	131.138	98.5315
965	111.321	369	115.198	107.444
966	61.3802	56	66.1401	56.6204
967	83.8619	115	84.7551	82.9686
968	138.746	502	139.887	137.606
969	70.9452	278	75.0831	66.8072
970	94.3123	323	100.077	88.5477
971	95.8455	681	104.908	86.7828
972	112.58	195	117.768	107.392
973	125.634	222	128.309	122.959
974	82.3667	337	88.3627	76.3706
975	79.3444	143	89.6134	69.0755
976	84.808	464	91.9657	77.6503
977	103.565	146	104.315	102.814
978	91.3216	909	98.6326	84.0107
979	87.9102	250	98.3595	77.4608
980	75.1844	141	78.0047	72.3642
981	114.742	191	122.418	107.066
982	116.384	226	122.156	110.612
983	82.6574	223	91.9685	73.3463
984	141.402	259	146.05	136.754
985	116.984	194	119.89	114.078
986	113.975	232	125.011	102.94
987	150.612	374	176.557	124.668
988	96.7602	120	99.1996	94.3208
989	82.9808	142	97.6534	68.3082
990	72.9627	79	80.0414	65.8841
991	112.502	366	126.252	98.7513
992	106.974	199	112.89	101.057
993	70.1438	66	76.6989	63.5887
994	70.6602	71	78.4162	62.9042
995	71.5016	74	74.532	68.4712
996	86.1141	101	99.5262	72.702
997	103.14	495	105.835	100.445
998	98.6908	266	106.369	91.0125
999	83.4361	105	94.8302	72.042
1000	76.9836	116	83.4178	70.5494
1001	94.4735	149	102.016	86.931
1002	78.1302	71	90.723	65.5374
1003	165.553	1229	183.059	148.047
1004	80.3419	76	94.8236	65.8602
1005	82.073	109	91.7645	72.3816
1006	162.709	764	185.101	140.317
1007	122.101	223	146.012	98.1899
1008	62.2702	50	69.5924	54.948
1009	86.6157	95	91.9826	81.2487
1010	111.85	380	120.132	103.568
1011	96.7001	186	97.2968	96.1033
1012	132.595	283	165.621	99.569
1013	228.716	752	311.613	145.82
1014	77.1763	101	84.2603	70.0922
1015	86.5591	93	88.6666	84.4516
1016	100.527	182	114.533	86.5203
1017	81.6784	85	93.5306	69.8261
1018	65.4619	61	70.8755	60.0484
1019	75.5263	70	79.1658	71.8868
1020	81.5995	313	87.2806	75.9184
1021	74.7116	178	78.444	70.9792
1022	90.6912	323	95.777	85.6054
1023	141.545	271	177.487	105.602
1024	103.976	160	111.141	96.8106
1025	88.7841	182	97.2954	80.2728
1026	77.8422	110	79.4769	76.2075
1027	82.6424	82	86.4001	78.8847
1028	113.661	147	118.71	108.612
1029	101.535	428	107.715	95.3544
1030	90.0352	274	96.9261	83.1442
1031	86.0933	123	90.0439	82.1427
1032	100.863	146	106.878	94.8483
1033	103.635	184	111.558	95.7121
1034	111.146	432	131.931	90.3621
1035	90.0105	187	92.0194	88.0016
1036	87.447	454	92.6035	82.2904
1037	106.409	159	117.946	94.8717
1038	58.0996	51	68.7857	47.4134
1039	98.6472	123	99.3418	97.9527
1040	84.6004	86	91.5056	77.6951
1041	107.929	502	130.251	85.6063
1042	64.1132	67	71.2523	56.974
1043	108.608	954	144.263	72.9539
1044	75.8442	115	86.7969	64.8915
1045	160.015	506	193.056	126.973
1046	74.6815	78	84.998	64.365
1047	160.006	748	176.112	143.899
1048	66.3512	57	71.8835	60.819
1049	74.2324	167	85.7415	62.7233
1050	89.5579	127	102.891	76.2249
1051	118.999	304	127.845	110.154
1052	145.608	503	160.274	130.941
1053	82.4781	97	89.4133	75.5428
1054	92.0796	133	97.9806	86.1785
1055	85.8112	279	91.2643	80.3582
1056	97.4573	205	115.387	79.5271
1057	77.7211	327	82.9808	72.4615
1058	105.658	795	116.668	94.6482
1059	142.243	476	151.686	132.799
1060	83.6171	88	88.3477	78.8864
1061	93.7635	792	104.369	83.1584
1062	112.413	252	125.712	99.114
1063	76.1595	188	83.0406	69.2784
1064	88.2212	89	103.875	72.5672
1065	77.865	405	80.723	75.007
1066	81.1899	94	88.1054	74.2745
1067	84.7868	91	89.8432	79.7305
1068	104.724	152	114.182	95.2656
1069	138.422	469	157.008	119.836
1070	88.6481	319	97.2468	80.0494
1071	71.4659	65	74.0622	68.8697
1072	101.375	189	109.805	92.946
1073	101.317	773	102.263	100.37
1074	125.26	286	130.254	120.266
1075	83.5157	2453	87.887	79.1444
1076	132.454	690	139.718	125.189
1077	71.6549	121	78.7985	64.5113
1078	56.979	58	65.0109	48.9472
1079	107.499	251	116.331	98.6675
1080	104.33	161	117.527	91.1338
1081	80.753	75	93.0862	68.4198
1082	73.9552	238	77.3552	70.5553
1083	85.2143	105	97.9397	72.4888
1084	140.516	359	150.187	130.846
1085	74.9002	611	77.4125	72.3879
1086	69.0654	100	75.8033	62.3275
1087	108.443	146	113.266	103.62
1088	122.599	280	136.542	108.657
1089	82.9573	106	86.4633	79.4514
1090	69.6166	62	76.2891	62.9442
1091	81.9433	161	89.3759	74.5106
1092	92.2281	191	106.888	77.5684
1093	77.8666	136	77.9915	77.7416
1094	95.267	112	101.363	89.1711
1095	104.718	162	116.418	93.0192
1096	90.1199	304	94.6012	85.6386
1097	112.598	371	125.153	100.043
1098	86.1232	450	97.5173	74.7291
1099	73.6574	90	83.1531	64.1617
1100	140.398	762	144.19	136.605
1101	87.417	109	93.704	81.13
1102	69.2677	62	71.2162	67.3192
1103	85.6816	97	94.7274	76.6359
1104	95.5896	461	100.558	90.6215
1105	72.5867	68	80.474	64.6994
1106	114.248	306	125.088	103.408
1107	103.614	332	110.782	96.4457
1108	81.0942	81	96.2263	65.9622
1109	93.0344	128	108.857	77.2116
1110	67.5495	61	68.0928	67.0061
1111	114.085	182	128.188	99.9824
1112	82.4809	215	86.1822	78.7797
1113	115.977	405	125.87	106.084
1114	93.2852	193	97.0813	89.489
1115	97.3309	107	100.861	93.8009
1116	76.3167	86	82.7829	69.8504
1117	83.5045	216	91.5849	75.4241
1118	86.2056	109	96.8596	75.5517
1119	72.3131	93	80.3322	64.294
1120	78.6751	244	89.5663	67.7838
1121	89.7279	84	91.4086	88.0471
1122	106.396	183	119.213	93.5788
1123	89.4976	252	90.3038	88.6914
1124	64.74	60	65.1672	64.3128
1125	85.0087	97	88.0686	81.9488
1126	63.8004	50	71.6533	55.9474
1127	94.9148	116	107.445	82.3846
1128	97.1508	292	100.974	93.3279
1129	95.8593	181	103.935	87.7838
1130	90.8549	127	99.7841	81.9258
1131	123.049	495	134.995	111.103
1132	62.6279	59	65.0703	60.1855
1133	84.0746	99	92.6313	75.5179
1134	148.761	483	164.796	132.726
1135	98.6129	124	106.238	90.9881
1136	78.6897	183	85.3008	72.0786
1137	85.9117	210	95.2288	76.5946
1138	76.9289	82	85.5167	68.341
1139	85.6251	107	87.1885	84.0617
1140	105.745	508	118.988	92.5011
1141	74.6881	308	76.8249	72.5514
1142	118.448	310	127.314	109.582
1143	99.0508	157	104.781	93.3203
1144	86.3335	161	97.9705	74.6965
1145	80.2804	852	88.0353	72.5254
1146	82.559	302	88.7641	76.354
1147	97.2092	383	104.334	90.0841
1148	76.0158	83	88.9175	63.1142
1149	96.0299	400	102.116	89.9434
1150	87.3119	143	90.8892	83.7347
1151	125.197	257	131.509	118.884
1152	98.8101	221	113.166	84.4537
1153	79.8168	247	80.9578	78.6758
1154	63.7994	55	72.0103	55.5885
1155	109.946	155	121.792	98.099
1156	133.627	254	151.615	115.638
1157	68.5207	62	70.1814	66.8601
1158	99.0674	140	109.8	88.3345
1159	70.1856	69	75.875	64.4963
1160	104.398	555	106.499	102.297
1161	83.9626	93	87.2175	80.7078
1162	64.0871	58	68.9558	59.2183
1163	93.2112	402	98.3101	88.1122
1164	91.2744	279	97.0095	85.5393
1165	94.2165	311	102.87	85.5628
1166	105.733	120	107.179	104.286
1167	76.0797	115	82.6745	69.4848
1168	88.705	2663	97.7349	79.6752
1169	163.305	509	194.004	132.606
1170	124.309	270	136.784	111.835
1171	82.5951	97	86.9724	78.2177
1172	83.8567	522	91.4223	76.291
1173	93.6411	184	95.9256	91.3567
1174	95.2078	808	100.999	89.417
1175	85.5743	269	90.103	81.0456
1176	67.0722	57	69.7286	64.4158
1177	83.0693	120	88.9539	77.1846
1178	136.752	444	160.35	113.153
1179	65.7388	50	69.4431	62.0345
1180	64.2241	84	70.5742	57.874
1181	110.44	477	119.48	101.401
1182	88.9205	117	95.0631	82.7779
1183	93.9555	172	103.027	84.8841
1184	98.1868	511	107.135	89.2384
1185	96.0241	532	103.902	88.1462
1186	118.946	332	130.78	107.113
1187	77.8268	67	84.6965	70.957
1188	74.9769	90	75.9869	73.967
1189	94.3322	125	108.04	80.6242
1190	69.9855	67	76.2043	63.7666
1191	80.1314	240	83.4087	76.8542
1192	91.2828	98	108.882	73.6835
1193	109.22	146	130.987	87.4537
1194	93.174	388	98.0388	88.3091
1195	116.574	171	145.204	87.9451
1196	93.8794	118	97.5583	90.2005
1197	98.2534	472	102.494	94.0124
1198	147.711	862	207.848	87.5743
1199	69.5257	70	74.4157	64.6356
1200	145.673	334	175.342	116.003
1201	134.027	331	142.904	125.151
1202	90.9058	149	96.6682	85.1434
1203	53.986	370	57.874	50.0981
1204	89.0994	285	97.7963	80.4025
1205	55.831	55	58.2187	53.4433
1206	86.6725	129	90.0958	83.2492
1207	67.3642	59	71.3886	63.3397
1208	97.8584	662	101.359	94.358
1209	59.0686	54	65.3605	52.7767
1210	92.5994	163	103.229	81.9694
1211	79.6985	85	91.8432	67.5539
1212	74.0963	546	78.2632	69.9293
1213	102.591	144	114.223	90.9586
1214	54.3151	65	56.5235	52.1067
1215	101.26	174	102.394	100.125
1216	63.649	59	70.2454	57.0526
1217	57.1578	50	64.0404	50.2752
1218	95.7011	123	98.0378	93.3644
1219	74.36	78	84.9278	63.7923
1220	91.0824	666	92.9706	89.1942
1221	82.0414	79	87.2269	76.8559
1222	63.8402	78	65.0832	62.5971
1223	77.1829	115	83.943	70.4229
1224	64.5047	57	72.4029	56.6064
1225	76.5424	147	79.4557	73.6291
1226	74.7862	75	80.0466	69.5258
1227	56.5235	88	62.5053	50.5418
1228	106.587	1285	118.565	94.609
1229	81.8757	188	84.7589	78.9926
1230	79.4335	284	84.4958	74.3711
1231	150.614	445	171.826	129.402
1232	93.7993	111	102.166	85.4323
1233	86.1871	134	95.3365	77.0376
1234	72.3822	66	77.6088	67.1557
1235	99.8049	264	104.217	95.3929
1236	71.9265	65	76.184	67.6689
1237	80.3912	394	84.5725	76.2099
1238	136.869	227	184.455	89.2838
1239	119.015	330	125.57	112.459
1240	95.8564	336	98.877	92.8357
1241	68.5614	70	70.8367	66.2861
1242	74.5762	88	79.6908	69.4615
1243	81.8837	266	84.1512	79.6163
1244	92.762	159	99.734	85.7901
1245	69.1549	1038	74.5981	63.7117
1246	82.8027	89	87.9263	77.6791
1247	89.0681	154	107.173	70.9632
1248	89.4228	342	94.4933	84.3522
1249	81.0951	244	86.9575	75.2327
1250	122.309	725	123.229	121.39
1251	101.682	154	116.793	86.5697
1252	91.4166	121	96.1895	86.6438
1253	101.356	212	107.489	95.2222
1254	67.685	69	72.1009	63.269
1255	66.8938	61	69.317	64.4706
1256	87.3846	144	90.9558	83.8134
1257	96.5397	204	98.5004	94.579
1258	91.0027	717	99.9018	82.1036
1259	85.048	135	89.9899	80.1062
1260	141.987	326	172.053	111.921
1261	83.9734	101	101.26	66.6864
1262	66.8088	336	70.4407	63.177
1263	94.2305	122	95.741	92.72
1264	91.5793	788	93.9461	89.2125
1265	98.4928	144	99.4482	97.5374
1266	78.5527	99	83.4408	73.6646
1267	79.8413	94	85.4233	74.2593
1268	75.4692	90	87.4287	63.5097
1269	69.4398	60	71.4889	67.3907
1270	98.3206	176	103.061	93.5798
1271	98.8885	119	108.348	89.4287
1272	167.856	854	253.475	82.2375
1273	82.4976	155	85.8673	79.1278
1274	96.2577	262	101.461	91.0539
1275	78.4829	865	84.779	72.1868
1276	85.7645	269	92.9981	78.531
1277	68.2517	74	75.2185	61.285
1278	88.016	119	93.3473	82.6846
1279	109.89	380	123.745	96.0355
1280	89.6106	319	90.5538	88.6674
1281	80.3646	261	88.177	72.5521
1282	77.2498	110	84.2936	70.2059
1283	90.5309	710	97.4979	83.5639
1284	81.2274	78	91.7446	70.7103
1285	90.6828	369	93.3777	87.9879
1286	69.9605	62	74.4503	65.4708
1287	92.5219	224	93.0683	91.9756
1288	85.3103	139	93.4464	77.1743
1289	104.147	128	124.988	83.3056
1290	85.3493	217	89.921	80.7777
1291	88.1441	170	98.4452	77.8429
1292	80.4017	88	89.9226	70.8808
1293	79.8869	115	90.5637	69.2102
1294	97.9602	129	99.7418	96.1786
1295	83.2746	216	94.2593	72.2899
1296	93.3362	96	110.424	76.2486
1297	87.8354	92	88.6269	87.044
1298	73.0754	71	73.6366	72.5143
1299	74.4043	83	84.4973	64.3113
1300	79.0947	98	80.8147	77.3746
1301	97.5189	213	110.965	84.0728
1302	113.99	375	122.282	105.699
1303	69.892	73	74.7866	64.9974
1304	85.0302	112	89.2014	80.8591
1305	67.0334	65	73.2142	60.8525
1306	90.831	401	105.77	75.8923
1307	100.921	211	108.496	93.3462
1308	126.752	224	158.75	94.7541
1309	90.7134	141	96.6111	84.8156
1310	63.2789	78	76.1941	50.3637
1311	79.259	391	79.979	78.539
1312	77.9828	88	83.372	72.5937
1313	77.3178	80	80.6798	73.9559
1314	122.608	227	136.753	108.463
1315	128.567	269	143.526	113.608
1316	98.943	1342	105.833	92.0533
1317	101.732	256	108.653	94.8116
1318	95.2301	184	106.106	84.3539
1319	76.1974	109	90.2334	62.1614
1320	79.4786	98	87.3978	71.5594
1321	106.505	789	108.368	104.642
1322	64.0313	54	66.7957	61.2668
1323	72.7983	64	73.4056	72.191
1324	66.0194	78	68.1274	63.9115
1325	150.93	953	181.735	120.124
1326	86.5274	458	91.1043	81.9505
1327	63.9782	57	65.7959	62.1606
1328	80.5825	83	85.5391	75.6259
1329	64.6972	67	68.9657	60.4287
1330	103.486	165	107.735	99.2362
1331	89.0644	300	93.0915	85.0373
1332	87.4121	169	97.3673	77.457
1333	129.911	622	139.318	120.504
1334	80.1847	231	80.9258	79.4436
1335	88.0551	321	93.4731	82.637
1336	57.5501	50	63.2234	51.8767
1337	82.944	890	103.244	62.6443
1338	87.2192	729	94.5151	79.9233
1339	81.8374	133	89.8056	73.8691
1340	110.237	155	140.613	79.8597
1341	100.456	173	107.294	93.6185
1342	86.766	1062	90.0655	83.4665
1343	86.3139	682	91.6908	80.9371
1344	132.382	343	150.114	114.65
1345	116.766	460	123.937	109.595
1346	90.853	616	94.3811	87.3248
1347	136.327	418	147.105	125.549
1348	112.077	676	122.048	102.105
1349	54.2547	146	55.1405	53.3689
1350	67.878	95	70.5053	65.2506
1351	75.6324	67	82.9112	68.3536
1352	76.1128	69	87.1787	65.0468
1353	83.8328	77	88.4578	79.2079
1354	63.7072	60	70.3602	57.0541
1355	81.5641	471	88.14	74.9881
1356	79.6174	77	81.6598	77.575
1357	75.0285	79	93.1048	56.9522
1358	73.3342	110	82.2748	64.3937
1359	77.2309	188	80.6492	73.8127
1360	105.131	403	110.8	99.463
1361	91.1097	492	93.1986	89.0209
1362	83.5027	78	94.0411	72.9643
1363	79.7802	77	90.2055	69.3549
1364	93.3711	142	98.694	88.0481
1365	78.1285	97	79.0522	77.2048
1366	49.8202	50	54.8677	44.7727
1367	97.651	952	104.411	90.8913
1368	125.755	320	159.018	92.4915
1369	84.0226	133	93.9459	74.0993
1370	82.0816	97	84.7264	79.4368
1371	89.4756	118	92.286	86.6652
1372	78.7527	733	82.3812	75.1241
1373	80.212	150	82.3235	78.1004
1374	139.456	319	166.458	112.454
1375	56.9142	52	59.4886	54.3399
1376	223.674	785	315.109	132.239
1377	81.2533	89	92.2718	70.2349
1378	98.709	116	102.651	94.7667
1379	65.4807	70	69.5815	61.38
1380	64.0098	57	71.256	56.7635
1381	80.8047	92	81.5458	80.0635
1382	104.304	571	116.201	92.4073
1383	75.1513	70	75.7618	74.5408
1384	96.2315	127	98.3069	94.1561
1385	107.375	586	131.75	83.0007
1386	74.0819	791	81.0049	67.1588
1387	88.191	106	98.7255	77.6564
1388	72.2647	513	76.0941	68.4354
1389	92.5624	243	95.4111	89.7136
1390	66.2652	63	69.7177	62.8126
1391	72.8116	70	74.3282	71.2951
1392	105.695	156	114.035	97.3541
1393	82.0187	189	86.6481	77.3893
1394	84.2039	81	92.6018	75.8061
1395	72.0692	64	77.8633	66.2752
1396	86.8984	135	96.0544	77.7423
1397	86.3822	221	92.4314	80.3329
1398	85.9833	3582	89.3151	82.6515
1399	68.3511	59	70.0458	66.6563
1400	90.8096	166	100.527	81.0919
1401	103.607	210	108.039	99.175
1402	177.91	539	232.059	123.761
1403	91.6873	274	98.4286	84.9459
1404	80.8876	103	95.7123	66.0628
1405	104.327	138	116.791	91.8638
1406	77.7849	185	82.8876	72.6821
1407	82.1613	119	91.2941	73.0284
1408	58.5823	50	64.2661	52.8985
1409	81.309	120	88.9928	73.6251
1410	59.0221	50	61.8116	56.2327
1411	76.0762	93	78.0883	74.064
1412	78.3359	773	79.1859	77.4859
1413	84.2785	104	84.596	83.9611
1414	80.2523	541	82.2763	78.2284
1415	81.3199	244	82.6749	79.9649
1416	123.716	258	126.919	120.513
1417	82.5509	89	95.1413	69.9605
1418	93.0288	104	98.6025	87.4551
1419	87.0223	157	96.8073	77.2374
1420	91.1207	558	98.6662	83.5752
1421	96.3999	283	98.1524	94.6473
1422	126.249	224	134.764	117.733
1423	89.4294	158	93.3017	85.5571
1424	79.2568	98	84.3052	74.2084
1425	134.79	509	169.159	100.421
1426	105.049	161	118.3	91.7991
1427	76.7005	103	87.9152	65.4859
1428	74.2937	63	78.7855	69.802
1429	58.8178	50	61.6372	55.9983
1430	93.5451	325	100.963	86.1267
1431	99.2935	143	108.943	89.6438
1432	88.4685	114	103.859	73.078
1433	73.8296	79	82.8676	64.7916
1434	68.7542	64	70.8932	66.6151
1435	91.8089	1275	97.1798	86.4381
1436	91.2759	1435	94.5305	88.0213
1437	83.404	108	85.3474	81.4606
1438	102.377	1054	119.963	84.7901
1439	95.5457	373	105.877	85.2143
1440	93.2518	142	111.622	74.8819
1441	70.4816	68	75.7458	65.2173
1442	62.6388	54	66.2308	59.0468
1443	74.4428	69	76.6918	72.1938
1444	86.4938	131	102.05	70.9375
1445	68.9474	67	76.7928	61.1021
1446	77.4643	72	83.7195	71.209
1447	87.6581	250	94.2651	81.0511
1448	70.5233	125	72.1061	68.9405
1449	104.176	196	120.755	87.5971
1450	74.8948	78	80.6643	69.1253
1451	115.423	248	125.511	105.335
1452	80.364	81	87.4782	73.2497
1453	86.6786	80	100.331	73.0261
1454	79.5531	97	84.3771	74.7291
1455	73.6743	212	79.2484	68.1002
1456	85.6411	89	95.3976	75.8846
1457	85.6359	98	103.071	68.2009
1458	74.5651	111	76.6512	72.479
1459	91.5711	166	108.395	74.7476
1460	80.1123	90	81.9616	78.2629
1461	81.1629	81	90.3444	71.9814
1462	65.7661	56	67.6303	63.902
1463	83.2276	97	87.3553	79.0999
1464	96.1479	122	105.716	86.5798
1465	65.1494	69	69.5069	60.792
1466	68.3362	346	74.2694	62.4029
1467	76.0577	71	78.8191	73.2963
1468	79.2732	79	85.487	73.0594
1469	86.7907	106	99.7808	73.8006
1470	82.1684	93	82.7805	81.5562
1471	91.8887	107	102.34	81.4372
1472	79.0236	78	86.7462	71.301
1473	68.6521	63	76.8492	60.4549
1474	77.0903	68	79.707	74.4735
1475	109.811	215	111.847	107.774
1476	83.0335	137	90.1019	75.965
1477	83.1452	86	88.3987	77.8916
1478	85.7748	135	93.6953	77.8543
1479	100.252	216	106.706	93.7972
1480	64.2187	238	72.687	55.7504
1481	58.9794	59	63.9971	53.9616
1482	90.9329	233	100.55	81.3156
1483	135.999	772	144.767	127.232
1484	93.2482	304	110.329	76.1675
1485	117.914	843	118.213	117.614
1486	110.336	289	117.856	102.815
1487	89.9883	229	95.6124	84.3643
1488	95.0311	130	96.1894	93.8728
1489	90.6217	2290	92.6662	88.5773
1490	59.7728	50	62.8012	56.7443
1491	91.3969	105	92.4503	90.3436
1492	88.6442	78	90.7661	86.5224
1493	89.1745	402	94.5856	83.7635
1494	84.558	97	90.487	78.629
1495	77.9464	129	88.2721	67.6206
1496	108.157	232	116.562	99.7527
1497	89.7792	107	92.4634	87.095
1498	78.9139	245	91.456	66.3718
1499	101.107	153	103.01	99.2039
1500	66.4241	61	68.739	64.1091
1501	75.0932	96	81.2702	68.9163
1502	79.0588	84	90.8592	67.2584
1503	87.7483	233	96.5237	78.9728
1504	84.6044	89	91.6643	77.5445
1505	69.8157	227	79.1883	60.443
1506	123.713	175	150.312	97.1131
1507	75.8262	68	79.183	72.4693
1508	92.7036	103	98.2846	87.1226
1509	81.7262	439	82.3291	81.1234
1510	132.211	741	156.8	107.622
1511	98.1039	144	100.646	95.5617
1512	79.7354	89	79.9753	79.4956
1513	86.1751	130	100.135	72.2152
1514	72.7369	140	74.9653	70.5084
1515	114.931	218	119.64	110.223
1516	90.7479	105	101.65	79.8456
1517	63.8417	56	68.8308	58.8525
1518	92.6967	2149	103.086	82.3073
1519	89.6187	173	103.878	75.3596
1520	109.512	139	119.852	99.1732
1521	71.5451	63	76.5199	66.5702
1522	74.4359	72	76.3568	72.5151
1523	87.0023	210	100.525	73.4797
1524	80.9715	319	84.0754	77.8676
1525	85.2281	122	86.3685	84.0877
1526	107.448	134	120.034	94.8629
1527	90.2135	186	100.675	79.7521
1528	105.371	2059	109.682	101.059
1529	69.6793	271	74.0434	65.3153
1530	128.753	450	146.152	111.353
1531	95.2772	239	98.4837	92.0708
1532	109.782	276	114.67	104.894
1533	90.5556	150	97.3151	83.7961
1534	99.0066	116	100.174	97.8387
1535	82.1944	134	85.7136	78.6752
1536	82.3574	523	88.4687	76.2461
1537	86.205	616	87.5562	84.8537
1538	131.069	374	140.827	121.311
1539	78.5891	85	86.3622	70.816
1540	79.4107	576	82.8159	76.0056
1541	89.9879	135	103.393	76.5825
1542	62.8347	54	66.2023	59.4671
1543	79.8493	1888	83.3121	76.3864
1544	57.1682	52	61.2448	53.0915
1545	78.3482	116	80.0445	76.6519
1546	77.0858	94	81.4587	72.7129
1547	136.199	369	178.656	93.7429
1548	85.4138	166	90.8616	79.9661
1549	83.6625	89	92.2732	75.0517
1550	77.5814	111	84.5137	70.6491
1551	81.8721	246	88.9836	74.7606
1552	122.73	750	151.404	94.0555
1553	70.8511	68	72.148	69.5543
1554	71.1342	67	72.8205	69.4479
1555	108.979	641	119.442	98.5161
1556	98.9744	120	104.302	93.6472
1557	62.4794	50	63.2339	61.725
1558	80.7027	109	90.3677	71.0378
1559	77.8621	199	89.4641	66.26
1560	78.2169	102	83.6939	72.74
1561	102.554	242	112.2	92.9081
1562	72.1812	68	81.0921	63.2704
1563	86.5646	3697	89.7014	83.4278
1564	60.1512	52	63.0191	57.2834
1565	101.139	135	111.433	90.8445
1566	94.4766	152	97.9465	91.0067
1567	97.1315	251	105.913	88.35
1568	87.9577	512	95.218	80.6974
1569	79.1171	77	88.1367	70.0975
1570	95.5505	290	102.397	88.7037
1571	78.4614	79	82.9863	73.9365
1572	64.0227	62	65.5502	62.4951
1573	87.5931	538	91.7847	83.4015
1574	83.1659	103	89.5984	76.7333
1575	83.1838	101	87.2927	79.0749
1576	97.8189	136	101.408	94.2298
1577	89.8571	241	101.879	77.8353
1578	91.0448	99	92.118	89.9716
1579	93.6266	131	106.877	80.376
1580	82.4486	182	87.3478	77.5495
1581	98.7044	453	104.215	93.1942
1582	81.1746	86	86.5858	75.7634
1583	76.192	83	81.5427	70.8413
1584	128.481	294	131.921	125.041
1585	75.702	81	82.5912	68.8129
1586	88.0935	899	88.1614	88.0257
1587	81.9786	1305	89.512	74.4452
1588	94.0622	204	109.062	79.0621
1589	70.7022	58	75.103	66.3015
1590	100.28	735	124.534	76.0252
1591	88.8828	129	93.6714	84.0943
1592	70.4613	67	71.6896	69.2331
1593	69.4353	73	76.8841	61.9865
1594	82.7344	104	96.2452	69.2237
1595	93.7923	236	99.9372	87.6474
1596	73.2528	87	80.4679	66.0378
1597	111.189	172	116.788	105.589
1598	77.3108	376	84.6283	69.9932
1599	76.6437	90	83.5318	69.7556
1600	80.0228	86	83.8055	76.24
1601	94.8411	271	107.469	82.2128
1602	88.9212	1382	89.4283	88.4141
1603	108.603	141	122.283	94.9228
1604	73.367	85	84.0787	62.6554
1605	71.7536	153	79.8494	63.6578
1606	100.846	126	115.1	86.5931
1607	84.028	117	88.3457	79.7103
1608	93.0529	99	97.1428	88.9631
1609	88.4612	157	91.9419	84.9806
1610	63.0967	55	68.3782	57.8151
1611	88.4516	1358	93.2104	83.6928
1612	113.257	222	128.054	98.4595
1613	79.4937	158	83.7099	75.2774
1614	82.2762	113	88.8628	75.6895
1615	110.728	264	124.018	97.437
1616	69.6996	68	82.1227	57.2766
1617	98.3108	1978	101.78	94.8419
1618	115.479	196	149.359	81.5984
1619	86.8338	574	95.8933	77.7742
1620	95.086	272	102.587	87.5851
1621	108.012	942	131.167	84.8568
1622	78.9996	107	80.043	77.9562
1623	112.58	610	115.747	109.413
1624	79.3208	151	88.2382	70.4034
1625	88.7946	1152	92.1171	85.4722
1626	84.883	626	91.6545	78.1115
1627	88.7558	150	92.9207	84.5909
1628	76.2895	97	80.5635	72.0155
1629	83.7177	538	83.7614	83.6739
1630	87.6056	238	102.03	73.1814
1631	70.5294	195	75.8966	65.1622
1632	65.4627	60	70.4169	60.5084
1633	82.688	188	86.4506	78.9254
1634	78.8161	76	92.9836	64.6486
1635	83.4538	195	96.4566	70.451
1636	93.6143	882	102.799	84.4297
1637	83.9826	94	87.6778	80.2874
1638	79.7446	81	88.8039	70.6854
1639	110.959	581	113.153	108.764
1640	66.9229	80	83.2622	50.5836
1641	109.358	150	139.597	79.1182
1642	80.126	89	81.0901	79.1618
1643	86.9136	139	92.3497	81.4775
1644	83.8821	197	84.5829	83.1813
1645	100.702	226	107.814	93.59
1646	114.549	1215	143.528	85.5691
1647	81.0986	90	86.807	75.3902
1648	86.5983	167	92.4545	80.7422
1649	79.8149	79	82.9295	76.7004
1650	74.9259	184	77.7165	72.1353
1651	97.0573	497	106.538	87.5767
1652	78.9253	103	83.3382	74.5123
1653	80.8195	367	85.6428	75.9962
1654	74.2055	77	87.0753	61.3357
1655	77.4534	99	81.5285	73.3782
1656	78.4054	497	81.9636	74.8471
1657	91.2033	432	97.1936	85.213
1658	65.4303	57	71.3773	59.4833
1659	75.3167	1185	76.7843	73.849
1660	83.4647	113	89.7478	77.1816
1661	81.6336	166	91.1152	72.1521
1662	79.264	85	86.6928	71.8352
1663	82.1012	218	83.4216	80.7807
1664	91.2024	141	91.7887	90.6161
1665	102.071	129	112.579	91.564
1666	71.439	62	73.1778	69.7002
1667	73.9423	103	87.9315	59.9531
1668	67.958	178	68.5898	67.3262
1669	84.1986	183	91.1015	77.2958
1670	72.6171	74	78.1201	67.1141
1671	83.5192	86	85.004	82.0344
1672	77.1697	252	81.6572	72.6822
1673	90.4424	105	94.2524	86.6325
1674	91.4256	111	96.6722	86.1789
1675	78.9587	94	92.196	65.7214
1676	130.768	329	135.687	125.849
1677	93.9675	189	97.5729	90.362
1678	72.0354	97	81.996	62.0749
1679	84.014	110	88.8862	79.1418
1680	92.6957	278	101.401	83.9905
1681	81.5515	124	84.1588	78.9443
1682	70.7252	104	77.8291	63.6213
1683	84.2786	128	91.8075	76.7496
1684	73.4666	71	78.457	68.4763
1685	95.1668	679	105.196	85.1381
1686	133.265	2234	139.976	126.553
1687	80.9661	219	90.1389	71.7934
1688	87.3258	222	92.091	82.5606
1689	116.958	185	123.967	109.95
1690	83.1158	687	85.7542	80.4773
1691	86.466	204	95.6201	77.3119
1692	71.7991	240	79.6903	63.9079
1693	63.5741	51	68.9671	58.1811
1694	76.7757	331	83.5855	69.9658
1695	70.8797	80	76.4893	65.2701
1696	73.4688	141	74.6906	72.2469
1697	60.9842	54	62.5977	59.3707
1698	81.062	368	83.0043	79.1196
1699	76.4172	76	80.5023	72.3321
1700	57.6326	166	65.5459	49.7194
1701	70.9863	120	77.4862	64.4863
1702	75.9496	77	82.8453	69.0538
1703	90.138	662	96.5278	83.7483
1704	80.3395	102	85.4666	75.2124
1705	72.5203	224	79.8577	65.1829
1706	65.0164	59	72.873	57.1598
1707	84.8522	108	94.3867	75.3177
1708	89.7795	155	101.248	78.3114
1709	73.2514	88	77.9935	68.5093
1710	78.8727	232	82.5103	75.235
1711	81.8828	91	89.2932	74.4724
1712	84.908	168	90.3667	79.4494
1713	62.5891	51	63.6795	61.4987
1714	63.0654	244	64.9507	61.1801
1715	72.8249	107	79.7136	65.9361
1716	79.0975	440	85.5846	72.6104
1717	89.2284	889	90.2642	88.1925
1718	86.6314	104	94.7808	78.4821
1719	78.5012	679	84.7785	72.2239
1720	86.7663	131	90.2768	83.2559
1721	92.2777	239	95.8517	88.7037
1722	74.2436	68	79.9408	68.5463
1723	88.0679	155	88.7705	87.3653
1724	115.248	186	159.522	70.9733
1725	80.1993	129	87.1216	73.277
1726	90.0647	131	93.4442	86.6852
1727	83.0474	245	91.3634	74.7314
1728	78.2816	84	89.765	66.7981
1729	80.4894	114	90.473	70.5059
1730	84.1195	132	84.9477	83.2914
1731	88.1505	192	110.474	65.8266
1732	93.2093	737	101.747	84.6712
1733	70.0256	69	73.4082	66.643
1734	72.5438	221	77.4519	67.6358
1735	71.9885	1093	74.4562	69.5208
1736	77.5361	178	79.8558	75.2164
1737	97.9129	204	105.262	90.5632
1738	73.4167	80	75.5014	71.3319
1739	84.4628	111	93.5621	75.3634
1740	67.7655	104	69.3858	66.1452
1741	72.5809	63	73.2395	71.9223
1742	72.8299	603	73.3364	72.3234
1743	114.18	253	145.734	82.6256
1744	76.8961	203	79.0073	74.7849
1745	97.7613	464	98.0988	97.4238
1746	78.9798	89	82.8355	75.124
1747	61.4455	70	67.2582	55.6327
1748	83.9009	80	97.3759	70.4259
1749	97.7332	162	106.008	89.4587
1750	62.9497	53	68.4361	57.4634
1751	95.5533	766	102.971	88.1354
1752	72.7357	115	80.5125	64.959
1753	143.572	405	164.538	122.605
1754	76.1582	75	83.0418	69.2745
1755	94.0591	344	100.439	87.6788
1756	103.864	775	120.518	87.2105
1757	67.267	60	71.6794	62.8546
1758	83.6785	291	91.3535	76.0035
1759	88.2001	223	93.7936	82.6066
1760	80.8836	199	88.0909	73.6763
1761	92.282	191	99.3146	85.2494
1762	91.3854	862	97.8189	84.9518
1763	248.132	1339	401.66	94.6047
1764	78.3127	98	79.0682	77.5572
1765	60.9889	52	65.7419	56.2359
1766	79.1208	137	81.736	76.5056
1767	119.414	239	131.206	107.622
1768	96.1193	115	98.5012	93.7374
1769	83.7228	97	90.6043	76.8413
1770	88.5424	226	98.4227	78.6621
1771	87.7623	87	98.5568	76.9679
1772	61.5953	50	63.1526	60.0379
1773	84.5503	300	89.9484	79.1523
1774	77.5152	170	85.818	69.2124
1775	88.5656	1714	91.1096	86.0216
1776	60.8308	53	64.8014	56.8602
1777	111.714	266	114.432	108.995
1778	92.9152	159	93.9942	91.8362
1779	84.6488	105	93.3358	75.9617
1780	82.5954	119	86.4435	78.7473
1781	80.8729	98	81.6134	80.1323
1782	65.738	306	70.9003	60.5756
1783	87.6474	227	97.5258	77.769
1784	81.4825	95	81.8236	81.1415
1785	73.7142	65	84.8928	62.5357
1786	88.0433	130	96.6606	79.4259
1787	81.9176	2739	83.1295	80.7057
1788	85.4178	151	91.1776	79.6579
1789	74.8643	84	87.0079	62.7207
1790	78.5331	489	83.8954	73.1709
1791	91.0469	243	103.6	78.4933
1792	96.1676	1527	97.7288	94.6065
1793	77.9014	97	80.6002	75.2026
1794	110.768	182	124.956	96.5799
1795	100.949	285	101.339	100.558
1796	88.5121	110	98.6093	78.4149
1797	72.7778	135	77.0052	68.5503
1798	90.348	166	103.094	77.6019
1799	91.5839	1606	102.124	81.0443
1800	69.6435	65	72.7848	66.5022
1801	92.5643	646	95.536	89.5927
1802	90.7699	315	95.129	86.4109
1803	87.0847	113	96.5108	77.6587
1804	87.4956	197	90.7574	84.2337
1805	67.0184	59	70.0852	63.9516
1806	107.252	275	133.09	81.4149
1807	80.8353	85	81.209	80.4616
1808	61.3644	56	63.1706	59.5581
1809	60.5956	54	62.7697	58.4216
1810	72.3138	71	83.3314	61.2962
1811	114.619	279	118.142	111.097
1812	98.6874	166	103.466	93.9093
1813	76.1264	77	82.9455	69.3074
1814	69.1716	251	78.5123	59.831
1815	74.4184	100	75.6396	73.1972
1816	58.7059	61	59.0692	58.3426
1817	77.7579	79	90.4817	65.0341
1818	81.5954	88	91.4188	71.7721
1819	73.3944	176	80.3252	66.4636
1820	76.6319	167	80.1054	73.1583
1821	87.731	118	91.7291	83.733
1822	63.2661	50	63.8184	62.7138
1823	85.4816	602	85.8896	85.0735
1824	73.2569	228	85.3146	61.1992
1825	108.87	219	116.352	101.388
1826	86.9036	883	87.479	86.3282
1827	116.403	185	124.377	108.429
1828	80.3341	232	81.6384	79.0298
1829	82.6864	543	85.529	79.8438
1830	65.668	86	71.9182	59.4178
1831	56.7804	50	64.8547	48.7061
1832	56.4854	50	63.3549	49.6159
1833	62.5334	54	66.8654	58.2014
1834	93.367	511	99.5006	87.2334
1835	74.3182	76	77.3812	71.2551
1836	91.0197	133	106.644	75.3956
1837	76.0605	79	83.2502	68.8708
1838	83.3656	176	94.5744	72.1567
1839	113.852	459	129.67	98.0342
1840	81.804	108	92.6012	71.0068
1841	88.3429	455	89.8937	86.7921
1842	62.9478	184	63.6412	62.2545
1843	70.9475	107	78.7429	63.1522
1844	86.59	162	94.6301	78.5499
1845	78.0518	104	82.7103	73.3933
1846	98.7221	129	99.2007	98.2434
1847	77.5931	87	88.7253	66.4609
1848	56.1896	64	57.6695	54.7096
1849	61.1033	119	67.3516	54.855
1850	118.065	267	125.617	110.512
1851	62.4956	57	66.3313	58.66
1852	91.4032	1064	98.0404	84.7661
1853	82.3029	150	87.7956	76.8101
1854	64.0599	58	65.8775	62.2422
1855	90.0696	483	91.6821	88.4571
1856	95.9729	306	101.65	90.2955
1857	97.6213	458	99.8084	95.4341
1858	92.6681	110	97.516	87.8203
1859	82.6445	102	89.5802	75.7088
1860	86.4897	1744	102.183	70.7964
1861	73.3038	68	75.8101	70.7975
1862	79.5259	193	84.5239	74.5279
1863	66.0035	78	71.0731	60.9339
1864	93.8552	1646	100.556	87.1548
1865	76.2203	91	77.6282	74.8124
1866	101.57	198	117.595	85.546
1867	89.0769	489	92.7314	85.4224
1868	96.6833	349	96.9189	96.4478
1869	95.2122	128	103.991	86.4335
1870	142.934	371	179.34	106.528
1871	67.9885	67	73.4094	62.5676
1872	65.9728	212	70.0954	61.8501
1873	97.831	437	116.537	79.1247
1874	92.0172	101	108.824	75.2107
1875	72.1217	251	79.343	64.9004
1876	91.8441	157	96.584	87.1041
1877	99.2652	128	100.228	98.3024
1878	87.4515	98	101.532	73.371
1879	68.9223	1044	69.3899	68.4546
1880	88.6955	511	94.5941	82.797
1881	73.0762	73	75.961	70.1914
1882	91.5673	180	96.9922	86.1424
1883	78.8509	110	86.0043	71.6974
1884	58.3178	300	65.1	51.5357
1885	88.6082	122	92.4005	84.8158
1886	79.8659	108	81.219	78.5128
1887	87.7669	284	95.3013	80.2325
1888	102.537	214	111.899	93.1748
1889	82.235	174	88.1105	76.3595
1890	70.6611	85	78.2858	63.0365
1891	102.991	130	107.723	98.2593
1892	75.5524	115	82.6463	68.4586
1893	84.7376	206	93.0141	76.4612
1894	96.2091	229	101.299	91.1195
1895	67.7286	59	72.626	62.8312
1896	79.9254	81	85.2613	74.5895
1897	93.3271	540	95.3461	91.3082
1898	83.0965	136	85.5242	80.6687
1899	86.2401	129	89.9366	82.5435
1900	68.379	64	74.4622	62.2958
1901	71.3704	115	73.8417	68.8991
1902	62.6816	436	63.9802	61.383
1903	74.2833	94	88.4988	60.0678
1904	94.8505	388	96.6361	93.0649
1905	103.924	154	105.957	101.89
1906	86.6743	157	95.6457	77.703
1907	92.3604	1344	93.6419	91.0789
1908	86.3713	235	98.1724	74.5702
1909	114.225	186	124.513	103.937
1910	72.0643	181	73.8646	70.2641
1911	67.7913	83	71.7058	63.8767
1912	82.6824	85	88.9163	76.4484
1913	81.4301	171	82.8433	80.0168
1914	73.9625	381	78.0272	69.8978
1915	100.732	292	107.839	93.6252
1916	87.2324	211	91.3889	83.0758
1917	93.5427	331	102.765	84.32
1918	76.8127	106	84.8874	68.738
1919	93.3362	434	96.3748	90.2976
1920	83.0773	1438	89.0281	77.1265
1921	67.7602	178	78.4224	57.098
1922	90.9498	108	102.122	79.7778
1923	85.4758	262	93.1552	77.7964
1924	81.9289	106	93.1438	70.714
1925	82.9895	182	86.1748	79.8043
1926	67.9779	87	75.5335	60.4222
1927	85.3328	721	96.6198	74.0458
1928	86.0573	154	93.4727	78.642
1929	95.6211	168	102.888	88.3546
1930	97.7748	369	100.017	95.533
1931	64.2999	77	70.5047	58.0952
1932	85.9786	845	89.8806	82.0766
1933	72.5227	73	76.0177	69.0277
1934	97.7708	236	105.367	90.175
1935	73.3637	67	89.1413	57.586
1936	76.5071	91	78.5978	74.4164
1937	90.8703	100	98.7101	83.0306
1938	83.1802	105	94.7464	71.6139
1939	102.989	341	115.179	90.799
1940	128.828	278	146.592	111.064
1941	87.7222	306	88.0424	87.4021
1942	88.7927	225	97.4198	80.1656
1943	92.862	121	100.722	85.0021
1944	74.2572	108	77.4347	71.0797
1945	70.1809	72	78.2965	62.0653
1946	58.7388	51	60.9823	56.4953
1947	74.2259	220	75.8609	72.5908
1948	53.7529	537	56.8937	50.6122
1949	67.0924	62	69.9712	64.2135
1950	91.4579	187	100.631	82.2851
1951	96.3947	640	103.484	89.3051
1952	63.0245	149	70.5095	55.5396
1953	55.5423	51	56.8311	54.2536
1954	88.4269	277	99.82	77.0337
1955	73.0825	62	76.8674	69.2975
1956	100.577	241	113.437	87.7173
1957	86.0262	247	87.7376	84.3148
1958	93.1392	148	96.5073	89.7712
1959	73.7116	212	74.972	72.4512
1960	66.8521	243	70.3073	63.3969
1961	97.5031	187	101.459	93.5476
1962	77.0401	75	80.181	73.8992
1963	64.0929	61	71.8236	56.3623
1964	74.5081	227	77.9506	71.0656
1965	95.6609	175	104.013	87.3086
1966	97.1983	260	101.319	93.0778
1967	85.5354	515	86.7871	84.2837
1968	80.6253	323	83.731	77.5195
1969	90.9766	310	97.5815	84.3718
1970	90.681	474	101.136	80.226
1971	75.7669	193	80.0294	71.5043
1972	75.3101	213	78.3668	72.2535
1973	68.4299	58	76.1422	60.7177
1974	82.9987	229	86.6383	79.3591
1975	89.8822	328	93.4979	86.2666
1976	85.3644	221	92.6517	78.0771
1977	88.701	260	93.1288	84.2732
1978	83.69	171	84.8374	82.5426
1979	73.3158	132	76.6408	69.9908
1980	76.0796	460	79.6926	72.4665
1981	83.9155	110	87.2363	80.5947
1982	68.6797	397	72.0847	65.2747
1983	90.1725	103	103.715	76.6305
1984	66.3064	195	74.2951	58.3177
1985	76.2578	195	76.2761	76.2394
1986	73.4281	120	73.9246	72.9315
1987	75.5178	175	78.1923	72.8434
1988	69.5642	234	71.9032	67.2252
1989	83.0159	140	89.9568	76.075
1990	87.8279	126	91.8246	83.8311
1991	53.8265	108	56.9522	50.7008
1992	70.2462	63	77.6339	62.8586
1993	69.9172	99	75.8628	63.9716
