# Supplementary material for: Full assembly of HIV-1 particles requires assistance of the membrane curvature factor IRSp53
Source: eLife. 2021 Jun 11;10:e67321. doi: 10.7554/eLife.67321 (PMC8260224; doi:10.7554/eLife.67321)
Supplement: Figure 4—source data 1. [file elife-67321-fig4-data1.xlsx]

## Sheet: d0
cbc
0.703787
0.99489
0.999113
0.331809
0.414961
0.903405
0.951117
0.369775
0.445165
0.747715
0.987044
0.135525
0.997974
0.996174
0.644568
0.985911
0.340368
0.998665
0.820151
0.986048
0.553632
0.846418
0.918013
0.986923
0.416239
0.596653
0.812904
0.999436
0.960885
0.998197
0.23253
0.945953
0.999366
0.913935
0.999398
0.723195
0.998078
0.995807
-0.136713
0.779606
0.999057
0.777138
0.999894
0.0570104
0.998597
0.978447
0.998653
0.302827
0.521316
0.985825
0.211396
0.998552
0.913896
0.997622
0.881087
0.960193
0.984568
0.243807
0.999764
0.542715
-0.146266
0.998806
0.997163
0.924299
0.797591
0.998951
0.610885
0.899414
-0.123667
-0.0775239
0.999865
0.936073
0.959385
0.924516
0.998823
0.965266
0.929499
0.986098
0.800119
0.985613
0.99849
0.961871
0.699127
0.982648
-0.0863226
0.999139
0.962067
0.986132
-0.0488851
-0.0435595
0.450366
0.999206
0.994594
0.986543
0.926157
0.999624
0.340437
0.998298
0.793359
0.103504
0.999221
0.134861
0.985814
0.0659704
0.514464
0.998806
0.84015
0.999117
0.998799
0.699362
0.363746
0.654335
0.703337
0.999544
0.819243
0.65817
0.983887
0.998863
0.997499
0.984975
0.623752
0.999795
0.99958
0.58986
0.998561
0.998213
0.881696
0.311294
0.224518
0.264593
0.999793
0.998389
0.804005
0.862527
-0.0933188
0.999689
0.994884
0.949261
-0.159948
0.356505
0.90147
0.999097
0.388866
0.962964
0.959444
0.992681
0.995662
0.999484
0.997433
0.567283
-0.157788
0.986574
0.999738
0.814904
0.764779
0.997988
0.898543
0.914019
0.201804
0.177534
0.997991
0.99838
0.986031
0.999506
0.928495
0.298918
0.998836
0.207376
0.809806
0.670689
-0.0595655
0.99618
0.986135
0.994552
0.305319
0.986455
0.997989
0.156775
0.998823
0.999001
0.983735
0.962554
0.203619
0.924108
0.172363
0.556709
0.915649
0.98602
0.925965
0.977156
0.987474
0.673105
0.962094
0.493464
0.999203
0.985088
0.996159
0.886997
0.999234
0.996211
0.998874
0.287463
0.424494
0.999226
0.984084
0.999815
0.996028
0.999517
0.825822
0.984907
0.439288
0.832594
0.984341
-0.0777044
0.572238
0.999457
0.996093
0.924521
0.987571
0.947025
0.464162
0.999655
-0.102959
0.997749
0.959427
0.574308
0.108651
0.985327
0.962585
0.630276
0.962784
0.998961
0.985812
0.996663
0.911316
0.960495
0.707717
-0.0558339
0.598014
0.999477
0.93716
0.900223
0.9988
0.98752
0.997506
0.998622
0.986056
0.999097
0.923574
0.997561
0.896099
0.565163
0.999294
0.138356
0.0355988
0.924433
0.99763
0.588621
0.330503
0.999463
0.346681
0.986068
0.998816
0.167692
0.96122
0.998724
0.998147
0.580432
-0.0985756
-0.0919285
0.986022
0.975204
0.999442
0.960837
0.998895
0.709647
0.986144
0.422278
0.112109
0.879755
0.500946
0.985978
0.982197
0.999551
0.88079
0.99939
0.903829
0.998636
0.891519
0.601241
-0.0378644
0.923994
0.999689
0.848751
0.522745
0.999331
0.85763
0.880793
0.915612
0.866283
0.99908
0.929439
0.99906
0.938604
0.948153
0.743973
0.657715
0.986804
0.997954
0.947836
0.873226
-0.123737
0.46002
0.860023
0.785283
0.998609
0.924298
0.985756
0.622175
0.98773
0.999426
0.187619
0.914888
0.997989
0.998922
0.92376
0.374808
0.846962
0.922923
0.586898
0.181204
0.794152
0.908052
0.894033
0.910848
0.998745
0.542746
0.459585
0.998254
0.251355
0.268357
0.659763
0.998135
0.99955
0.987499
0.985317
0.146003
0.567243
0.961737
0.985858
0.998376
0.915541
0.999725
0.9874
0.63191
0.963059
0.99912
-0.243848
0.32097
0.99824
0.703751
0.985572
0.913757
0.523045
0.960118
0.758745
0.711823
0.961802
0.998263
0.974793
0.735114
0.987211
-0.191553
0.633355
0.999285
0.999093
0.98292
0.999033
0.984967
0.998045
0.994705
0.46013
0.41458
0.0841524
0.98717
0.987652
0.828131
0.999252
0.99957
0.985704
0.998755
0.985296
0.998895
0.22292
0.889591
0.799631
0.999016
0.998146
0.914579
0.678332
0.962204
0.679024
0.298324
0.986312
0.360111
0.574782
0.977617
0.958384
0.985463
0.999777
0.866323
0.91181
0.999508
0.97405
0.959173
0.946117
0.847007
0.347117
0.909627
0.538524
0.135368
0.32024
0.890705
0.99947
0.997565
0.312689
0.924315
0.999234
0.999219
0.987139
0.995585
0.99506
0.949328
0.232495
0.998534
0.999081
0.538567
0.996351
0.962927
0.98532
0.770466
0.46168
0.998392
0.978485
0.108339
0.928782
0.798262
-0.0778226
0.936999
0.999297
0.977483
0.568111
0.996646
0.287571
0.960822
0.999902
0.998645
0.999263
0.998617
0.958892
0.962818
0.0259824
0.8462
0.962738
0.986284
0.516477
0.935193
0.914362
0.999204
0.985639
0.804673
0.0609979
0.924719
0.998876
-0.0596255
0.897785
0.987526
0.99887
0.998759
0.864352
0.139236
0.36677
0.998252
0.987155
0.998327
0.155888
0.913942
0.998469
0.172876
0.963322
0.959785
0.543241
0.556062
0.997969
0.999609
0.151343
0.997216
0.846435
0.986868
0.998761
0.999294
0.794965
0.031015
0.998578
0.97747
0.719043
0.347867
0.923813
0.995659
0.810291
0.575932
0.9438
0.99891
0.994461
0.999049
0.94756
0.620333
0.91361
0.999169
0.91466
0.999638
0.997375
0.637408
0.958593
0.987509
0.116656
0.96101
0.188895
0.845715
0.610012
0.7516
0.998132
0.217969
0.987185
0.899638
0.653789
0.557709
0.907564
0.999212
0.399106
0.560187
0.532193
0.54555
0.961897
0.998005
0.997799
0.913765
0.998889
0.753085
0.806609
0.10856
0.999193
0.914277
0.459823
0.996712
0.914413
0.32643
0.358158
0.720427
0.187105
-0.015562
0.914599
0.986186
0.962992
0.984594
0.447172
0.998683
0.999167
0.347474
0.478131
0.341023
0.985421
0.997712
0.912857
-0.136576
0.974694
0.979407
0.106509
0.986484
0.542883
0.192638
0.998804
-0.229123
0.313546
0.995005
0.526897
0.186193
0.912535
0.650312
-0.0562669
0.927823
-0.11375
0.361165
0.680052
0.986117
0.671844
0.438939
0.102835
0.986332
0.102892
0.49181
0.675997
0.998309
0.999081
0.996893
0.999938
0.918617
0.962127
0.997973
0.997888
-0.0271273
0.999441
0.983664
0.442093
0.58476
0.999075
0.999329
-0.265906
-0.228034
0.181287
0.998675
0.623901
0.986852
0.999604
0.986746
0.986088
0.99737
0.217371
0.98708
0.999918
0.998858
0.925791
0.958419
0.962942
0.719419
0.844957
0.985441
0.983837
0.998494
0.490039
0.999423
0.999474
0.998652
0.998848
0.985833
0.231818
0.913533
0.999238
0.651001
0.865546
0.534581
0.922621
0.905246
0.542735
0.801965
-0.139627
0.1267
0.879529
0.998517
0.960456
0.108324
0.304716
0.998675
0.234237
0.856119
0.999438
0.235649
0.979434
0.96636
0.891395
0.268446
0.995618
0.529037
0.983746
0.983042
0.986454
0.717625
0.999315
0.961877
0.998991
-0.238148
0.437375
0.809559
0.999156
0.998969
0.995498
0.79524
0.331824
0.92542
0.913177
0.999134
0.999763
0.998688
0.381623
0.653515
0.985637
0.997863
0.991383
0.877123
0.998426
0.999879
0.999054
0.496139
0.752463
0.802505
0.777864
0.999011
0.999653
0.923066
0.99841
0.359676
0.660319
0.999248
0.984417
0.498334
0.95516
0.925024
0.371087
0.332491
0.224931
0.986392
0.167769
0.839013
0.962127
0.646318
-0.179771
0.63793
0.999206
0.828144
0.167318
0.651632
0.984298
-0.0860837
0.850533
0.731532
0.497539
0.767984
0.999096
0.91507
0.981947
0.321537
0.139204
0.986911
0.947242
-0.0777716
0.877627
0.999586
0.854997
0.999626
-0.0112115
0.924117
0.985741
0.998432
0.278933
0.149728
0.987026
0.623387
0.983015
0.546619
0.986396
0.983986
0.465483
0.999771
0.997708
0.998698
0.376073
0.72191
0.605477
0.972649
0.959948
0.999178
0.899968
-0.03801
0.607839
0.526939
0.997876
0.99814
0.847298
0.865861
0.999658
0.961813
0.999703
0.999014
0.201704
0.531455
0.985658
0.96185
0.999934
0.502785
0.461085
0.650296
0.342417
0.644074
0.439711
0.985931
-0.0863525
0.974711
0.924707
0.985373
0.475187
0.936906
0.912084
0.983925
0.998037
0.999598
0.995837
0.589359
0.653744
0.497995
0.998015
0.99683
0.638477
0.99929
0.961485
0.872132
0.565104
0.575918
0.91257
0.88954
0.998293
0.999468
0.999115
0.987301
0.366827
0.929337
0.97063
0.35978
0.999818
0.88003
0.927721
0.999494
-0.131884
0.999159
0.913212
0.0463594
0.999555
0.925915
0.98722
0.994627
0.999397
0.756037
0.336923
0.662005
0.914962
0.722019
0.891394
0.186269
0.981429
0.414004
0.181308
0.505698
0.999526
0.985751
-0.0596579
0.998275
0.985988
0.999428
0.478686
0.815487
0.998508
0.678102
0.176447
0.98708
0.999374
0.179508
0.332335
0.99835
0.0361622
0.985363
0.998534
0.984688
0.999398
0.998644
0.998437
0.961339
0.992996
0.273715
0.915131
0.727856
0.985436
0.754145
0.996508
0.0712848
0.677609
0.999462
0.4979
0.998316
0.905124
0.949903
0.961612
0.29797
0.999634
0.998935
0.880201
0.848252
0.683385
0.997828
0.699145
0.999581
-0.0413667

## Sheet: d20
cbc
0.365263
0.985879
0.999596
0.689064
0.843584
0.987301
0.89337
0.997348
0.984583
0.963137
0.777921
0.999346
0.813268
0.831828
0.792292
0.636431
0.92552
0.998221
0.402184
0.962174
0.563852
0.715992
0.31457
0.992519
0.758133
0.882983
0.914163
0.723661
0.999898
0.610204
0.792197
0.960336
0.810977
0.890252
0.996846
0.986166
0.912335
0.865174
0.996743
0.882397
0.901824
0.997925
0.999132
0.997673
0.0726541
0.961928
0.876458
0.957434
0.687972
0.926099
0.986048
0.912715
0.99884
0.986512
0.491404
0.759018
0.855022
0.235983
0.0993296
0.527748
0.916579
0.340508
0.998634
0.711912
0.985629
0.997673
0.985656
0.999381
0.81148
0.412798
0.985936
0.999646
0.98474
0.998983
0.999556
0.998318
0.731697
0.999073
0.986984
0.436467
0.768271
0.962245
0.843045
0.763138
0.985589
0.999202
0.999715
0.364454
0.926812
0.999546
0.779479
0.601411
0.961967
0.994662
0.888187
0.302056
0.887951
0.459628
0.923768
0.987121
0.999538
0.99939
0.996849
0.998383
0.985764
0.816857
0.370741
0.666415
0.957074
0.998981
0.961845
0.911291
0.958462
0.573571
0.634373
0.996821
0.803189
0.986434
0.221891
0.394168
0.790911
0.415505
0.151261
0.678127
0.994322
0.813653
0.890485
0.960444
0.777107
0.89133
0.800715
0.635923
0.983221
0.999749
0.975556
0.972216
0.987301
0.960948
0.731851
0.987609
0.996708
0.680454
0.948068
0.996842
0.501426
0.949392
0.535577
0.910273
0.414801
0.450751
0.676611
0.999707
0.766702
0.702392
0.560204
0.957692
0.499746
0.613522
0.980912
0.93622
0.688322
0.825538
0.402852
0.960518
0.846157
0.986803
0.986503
0.363709
0.925637
0.765706
0.889174
-0.0725765
0.98567
0.0849127
0.999165
0.999137
0.892576
0.998825
0.811815
0.811923
0.76958
0.845015
0.649992
0.996782
0.987596
0.851905
0.996627
0.985775
0.658037
0.199507
0.963595
0.40225
0.899138
0.984585
0.157718
0.998873
0.984119
0.751206
0.644953
0.865027
0.839209
0.999236
0.86588
0.998801
0.922626
0.503973
0.974439
0.999031
0.999744
0.821334
0.91407
0.789605
0.96263
0.998044
0.999128
0.893096
0.997434
0.621521
0.58769
0.985834
0.98296
0.998222
0.00842788
0.864348
0.998994
0.861109
0.875044
0.983074
0.890794
0.962904
0.999405
0.998722
0.933863
0.914118
0.646345
0.17969
0.916788
0.998136
0.960323
0.857028
0.962001
0.676745
0.947876
0.258607
0.999558
0.804071
0.985977
0.999787
0.987119
0.202088
0.998333
0.947279
0.960704
0.891374
0.78025
0.983461
0.962349
0.998494
0.595468
0.960659
0.986551
0.613508
0.915341
0.997302
0.102939
0.87754
0.857307
0.997232
0.987246
0.973336
0.92655
0.985764
0.952627
0.633459
0.998765
0.999865
0.840214
0.972113
0.859378
0.891189
0.914451
0.962092
0.59493
0.999078
0.998957
0.985965
0.914329
0.999804
0.962072
0.893177
0.99958
0.999653
0.998633
0.99954
0.743556
0.483866
0.982687
0.973991
0.999549
0.839255
0.036143
0.985998
0.962602
0.949358
0.998752
0.982491
0.891002
0.95776
0.961777
0.206366
0.999638
0.37095
0.126999
0.522251
0.985502
0.787023
0.997487
0.997784
0.877293
0.992608
0.455979
0.0283512
0.825368
0.999124
0.593944
0.983822
0.844509
0.999592
0.960082
0.290011
0.998872
0.986916
0.698651
0.985925
0.97239
0.999558
0.976821
0.862361
0.591682
0.949955
0.999647
0.84745
0.891497
0.99943
0.418606
0.922025
0.910795
0.879218
0.999131
0.422825
0.999267
0.501246
0.999291
0.999375
0.906813
0.833886
0.455507
0.999692
0.436797
0.999891
0.841811
0.472419
0.983337
0.730988
0.999386
0.993762
0.628761
0.927788
0.986021
0.113566
0.800468
0.56531
0.854219
0.999306
0.986207
0.67626
0.926713
0.998049
0.986775
0.887355
0.991738
0.675344
0.986859
0.985984
0.840778
0.449561
0.999589
0.983982
0.996581
0.939066
0.984189
0.840541
0.985949
0.894543
0.839237
0.70119
0.996229
0.987533
0.812369
0.985827
0.924372
0.833986
0.973382
0.987375
0.999108
0.998741
0.621691
0.668903
0.86542
0.918453
0.730651
0.417731
0.985801
0.999888
0.999232
0.987463
0.997887
0.848147
0.998753
0.396827
0.400265
0.997909
0.998242
0.610049
0.91473
0.997326
0.742895
0.787968
0.158045
0.876161
0.913635
0.98703
0.293687
0.985543
0.999648
0.981894
0.999466
0.998294
0.987091
0.949394
0.998632
0.987482
0.84597
0.959733
0.730398
0.900907
0.999157
0.839105
0.998149
0.912244
0.902642
0.893784
0.999438
0.813203
0.430935
0
0.98531
0.861725
0.765792
0.666984
0.960593
0.566065
0.913605
0.993884
0.999208
0.984636
0.998865
0.998807
0.962574
0.563589
0.998859
0.611583
0.98694
0.985324
0.963303
0.999329
0.969832
0.911506
0.984598
0.472518
0.972249
0.924875
0.944763
0.391874
0.466351
0.925252
0.132664
0.770104
0.87621
0.999274
0.801623
0.999072
0.82669
0.995992
0.999391
0.657146
0.999418
0.999299
0.608008
0.998813
0.46423
0.52289
0.386508
0.972868
0.909637
0.584353
0.482227
0.999259
0.70572
0.755154
0.998974
0.913704
0.886338
0.997704
0.999264
0.417937
0.729147
0.57451
0.886859
0.962783
0.959604
0.986923
0.999133
0.961127
0.995035
0.763138
0.686817
0.972427
0.865732
0.998734
0.633662
0.997909
0.446416
0.985253
0.621674
0.481401
0.798256
0.127667
0.999594
0.987325
0.146332
0.432684
0.889844
0.9988
0.584073
0.99985
0.649852
0.816244
0.998587
0.998568
0.999658
0.99941
0.986584
0.703165
0.99824
0.913876
0.518228
0.986509
0.987393
0.557831
0.999416
0.983991
0.999644
0.569013
0.998786
0.406329
0.99911
0.747238
0.998594
0.865079
0.731266
0.998285
0.856167
0.889769
0.948319
0.850243
0.986034
0.391436
0.999473
0.999064
0.959645
0.999973
-0.201909
0.997665
0.884952
0.986969
0.806615
0.999407
0.606942
0.997795
0.997205
0.891436
0.996409
0.983507
0.65355
0.890938
0.999874
0.868034
0.997993
0.722218
0.997453
0.633259
0.911618
0.755346
0.595653
0.893043
0.698434
0.962058
0.675722
0.448571
0.997974
0.985594
0.039827
0.997883
0.998082
0.960927
0.645061
0.99943
0.998621
0.986578
0.712736
0.979895
0.986296
0.385979
0.995302
0.998513
0.45045
0.616508
0.36724
0.998604
0.291406
0.999209
0.912751
0.876302
0.92537
0.998666
0.579307
0.825405
0.998684
0.984748
0.999852
0.998864
0.701607
0.926288
0.459665
0.914608
0.754477
0.902775
0.64781
0.997746
0.999711
0.731905
0.975507
0.997519
0.998929
0.315527
0.999795
0.707928
0.383313
0.85782
0.994607
0.999543
0.999137
0.998974
0.999345
0.999262
0.80852
0.84651
0.998783
0.987252
0.961096
0.8574
0.149805
0.997736
0.973309
0.0254482
0.774867
0.98349
0.99896
0.876619
0.998315
0.998778
0.83484
0.999395
0.98602
0.995727
0.828465
0.985212
0.999628
0.624929
0.98704
0.797345
0.889507
0.854297
0.220227
0.468773
0.999198
0.985831
0.986836
0.996416
0.136947
0.875138
0.910522
0.998771
0.999366
0.645438
0.918148
0.139771
0.579754
0.861282
0.996655
0.987094
0.428155
0.998934
0.475893
0.984884
0.865573
0.16855
0.864287
0.814638
0.89259
0.923093
0.997883
0.751001
0.987044
0.997491
0.998996
0.767834
0.987072
0.986438
0.890296
0.999272
0.881959
0.984091
0.982564
0.769864
0.911153
0.999845
0.492737
0.986792
0.846241
0.994195
0.998201
0.213301
0.999281
0.996013
0.987048
0.286384
0.568827
0.999428
0.623202
0.995887
0.962982
0.996798
0.972568
0.916136
0.533415
0.920056
0.980529
0.766862
0.999262
0.329593
0.997473
0.658523
0.9602
0.960419
0.925479
0.999153
0.986867
0.979309
0.146307
0.680346
0.999389
0.904703
0.972983
0.959371
0.999443
0.901621
0.961059
0.791045
0.998835
0.9994
0.946123
-0.0726519
0.999111
0.996652
0.481921
0.784116
0.998416
0.961609
0.987453
0.654598
0.998619
0.740026
0.927285
0.986439
0.99697
0.999411
0.141801
0.862574
0.960972
0.998898
0.999475
0.895516
0.235648
0.732588
0.999067
0.999692
0.910582
0.999403
0.146226
0.892205
0.824666
0.475765
0.697334
0.876031
0.985609
0.999237
0.999422
0.921106
0.985743
0.999304
0.475771
0.986705
0.998795
0.962004
0.999321
0.987102
0.0458071
0.999766
0.803519
0.998397
0.496143
0.998986
0.839258
0.646439
0.987431
0.83614
0.999423
0.821012
0.997429
0.995865
0.914024
0.99913
0.984616
0.999877
0.911856
0.769963
0.987244
0.780779
0.983704
0.905494
0.98546
0.985324
0.999393
0.986928
0.998478
0.999548
0.800308
0.987166
0.56681
0.504711
0.677133
0.999673
0.998363
0.99984
0.934895
0.986527
0.925482
0.999788
0.675863
0.999095
0.99786
-0.0224345
0.935116
0.998496
0.922954
0.383512
0.573632
0.392882
0.920199
0.538271
0.748823
0.867937
0.999886
0.974265
0.997922
0.998845
0.622547
0.902322
0.998962
0.534157
0.996223
0.841368
0.999851
0.986875
0.98731
0.798372
0.804622
0.997786

## Sheet: d40
cbc
0.66231
0.99788
0.997647
0.998915
0.924573
0.721435
0.987029
0.83021
0.738851
0.911937
0.928506
0.654721
0.720659
0.898423
0.600522
0.981393
0.961448
0.679647
0.925397
0.925874
0.188872
0.945466
0.995878
0.508861
0.925723
0.102518
0.913288
0.859282
0.861355
0.786319
0.864844
0.685138
0.494459
0.815786
0.981428
0.913874
0.997098
0.846918
0.753079
0.908026
0.998132
0.975213
0.888148
0.815469
0.878651
0.813324
0.998627
0.128499
0.924562
0.997913
0.998523
0.924388
0.555719
0.610809
0.985731
0.824712
0.985749
0.864938
0.9276
0.979671
0.877018
0.926206
0.986554
0.826476
0.418965
0.997863
0.890594
0.151067
0.96155
0.679818
0.913205
0.99974
0.401644
0.843663
0.986946
0.538622
0.9983
0.720961
0.549814
0.960826
0.993607
0.999076
0.987009
0.997932
0.998357
0.997847
0.998924
0.693914
0.998785
0.794962
0.923427
0.960255
0.960195
0.941921
0.995695
0.999291
0.997341
0.855363
0.998196
0.997283
0.984913
0.756185
0.803335
0.951009
0.911481
0.856899
0.899093
0.252919
0.961817
0.998095
0.998351
0.995248
0.96169
0.997094
0.80515
0.845572
0.835449
0.985946
0.732842
0.88703
0.962012
0.95816
0.655341
0.892669
0.543486
0.71355
0.949781
0.770159
0.987003
0.923666
0.718343
0.404545
0.605161
0.913352
0.961579
0.997061
0.904096
0.396206
0.880997
0.663684
0.950574
0.609734
0.858201
0.957681
0.605019
0.824712
0.711294
0.359453
0.994752
0.997857
0.987552
0.805219
0.845915
0.928158
0.462521
0.984657
0.996963
0.99608
0.790023
0.874837
0.47189
0.91435
0.912306
0.915488
0.998508
0.586062
0.914546
0.472531
0.92578
0.9973
0.281059
0.986758
0.999663
0.999157
0.887333
0.9983
0.520832
0.925805
0.892265
0.780086
0.817659
0.655655
0.946477
0.499243
0.945467
0.174622
0.585577
0.449294
0.962364
0.923644
0.8484
0.997025
0.838317
0.983349
0.999257
0.638391
0.999708
0.998761
0.91376
0.418947
0.457296
0.891978
0.999772
0.998958
0.892302
0.998701
0.999
0.995898
0.985896
0.996699
0.392548
0.962565
0.877555
0.927111
0.740834
0.999518
0.998216
0.910273
0.998848
0.772108
0.999173
0.75497
0.929107
0.999723
0.998664
0.983298
0.999137
0.962894
0.961279
0.441852
0.984157
0.709741
0.822357
0.847901
0.730812
0.962824
0.66638
0.894846
0.999364
0.913756
0.631057
0.744629
0.911355
0.709924
0.925428
0.997642
0.86947
0.999065
0.960354
0.984347
0.757651
0.780576
0.827781
0.928255
0.997592
0.888008
0.977276
0.650774
0.0703962
0.92488
0.631858
0.82372
0.888361
0.82736
0.469175
0.947802
0.998922
0.93287
0.913086
0.912934
0.706466
0.885185
0.999588
0.71435
0.308699
0.7209
0.984436
0.631781
0.998866
0.984092
0.777843
0.997007
0.891999
0.98597
0.75181
0.841164
0.745088
0.842328
0.985901
0.449234
0.848091
0.770025
0.99747
0.652695
0.998691
0.998656
0.471595
0.731338
0.822599
0.691919
0.149652
0.865327
0.799407
0.985948
0.844574
0.997642
0.901158
0.929063
0.998893
0.925666
0.989942
0.985526
0.986396
0.925575
0.98688
0.774194
0.643758
0.816258
0.986046
0.748187
0.910349
0.925464
0.913836
0.998568
0.985646
0.805099
0.975524
0.582297
0.984407
0.962228
-0.220308
0.999698
0.987175
0.841513
0.999794
0.999173
0.176263
0.998823
0.966073
0.799345
0.9255
0.99668
0.985929
0.435433
0.996146
0.987102
0.999136
0.778799
0.926457
0.541068
0.999175
0.393261
0.999745
0.914293
0.975966
0.916895
0.775481
0.986192
0.639668
0.469085
0.837458
0.495166
0.849376
0.578208
0.470536
0.722436
0.92627
0.996955
0.788183
0.900968
0.302412
0.947043
0.756002
0.996806
0.915403
0.835505
0.58816
0.545924
0.314661
0.810453
0.997708
0.997677
0.995473
0.99887
0.973824
0.843648
0.924002
0.960057
0.850331
0.998251
0.946415
0.913737
0.914223
0.96147
0.841943
0.744541
0.235605
0.925929
0.925408
0.814827
0.997037
0.777519
0.99917
0.997846
0.986317
0.960703
0.998449
0.998799
0.459697
0.996871
0.764668
0.375174
0.416204
0.998916
0.804309
0.99793
0.866817
0.486975
0.917117
0.745147
0.986092
0.478561
0.999475
0.406409
0.924065
0.846595
0.890744
0.855965
0.437324
0.998466
0.677779
0.997626
0.885463
0.999277
0.914429
0.410144
0.40456
0.999336
0.508283
0.481526
0.999021
0.856908
0.899238
0.9348
0.458257
0.63344
0.998974
0.986884
0.974175
0.926083
0.223364
0.877834
0.924223
0.9031
0.214501
0.999013
0.925105
0.374585
0.998812
0.814847
0.337204
0.875028
0.877475
0.839895
0.8426
0.998364
0.811515
0.900606
0.986182
0.946663
0.997419
0.957755
0.997548
0.995654
0.846512
0.986667
0.997586
0.828203
0.986282
0.456621
0.571043
0.40409
0.999158
0.84394
0.354425
0.479291
0.974515
0.777786
0.395405
0.852654
0.925584
0.881477
0.839797
0.99902
0.999105
0.998865
0.540469
0.777297
0.996058
0.901147
0.999503
0.873183
0.77934
0.99844
0.936945
0.998182
0.999711
0.996252
0.917666
0.889537
0.926214
0.8996
0.998409
0.925223
0.999017
0.857898
0.978312
0.801657
0.998044
0.751665
0.985931
0.998634
0.950047
0.992202
0.502652
0.170053
0.817066
0.92827
0.533528
0.99785
0.996781
0.99867
0.817398
0.792525
0.924282
0.893681
0.916648
0.704293
0.83918
0.497767
0.996051
0.852781
0.488282
-0.191705
0.998844
0.348301
0.508433
0.678479
0.724443
0.731907
0.961503
0.834749
0.885602
0.998009
0.999012
0.947128
0.769448
0.984042
0.452882
0.673149
0.912989
0.99469
0.993262
0.99827
0.460274
0.977625
0.385736
0.213415
0.998328
0.84518
0.471366
0.999068
0.962023
0.925169
0.999765
0.745689
0.913848
0.825076
0.997292
0.666318
0.452628
0.999652
0.84158
0.878299
0.998901
0.805652
0.945745
0.855339
0.291892
0.857426
0.752815
0.869654
0.986813
0.962136
0.108604
0.720718
0.99601
0.817268
0.985147
0.619135
0.618618
0.86526
0.480901
0.917601
0.998879
0.712018
0.945728
0.998211
0.550178
0.986659
0.99938
0.90977
0.999602
0.786025
0.128587
0.543709
0.742591
0.437334
0.461917
0.99857
0.998931
0.742862
0.962664
0.99963
0.924988
0.39806
0.993349
0.985293
0.717209
0.999324
0.38553
0.998017
0.254537
-0.0302404
0.947788
0.918896
0.998677
0.995444
0.997084
0.719363
0.845378
0.999198
0.99974
0.994316
0.984829
0.810431
0.999469
0.827747
0.91113
0.807918
0.556643
0.911759
0.946843
0.867109
0.640389
0.907919
0.856829
0.961109
0.885642
0.925238
0.117371
0.470793
0.126854
0.985514
0.925306
0.870388
0.984619
0.91338
0.471598
0.847081
0.914857
0.509759
0.928212
0.960468
0.998684
0.881531
0.99869
0.999401
0.472432
0.996237
0.999537
0.901703
0.886818
0.986834
0.744358
0.998445
0.999132
0.732972
0.999943
0.470127
0.973724
0.998435
0.50943
0.99808
0.676814
0.808616
0.998861
0.99891
0.984518
0.926141
0.998843
0.599103
0.811095
0.879547
0.998417
0.913563
0.769463
0.963321
0.892853
0.780232
0.892161
0.998683
0.745295
0.856593
0.947703
0.986199
0.999422
0.998811
0.818398
0.962685
0.647289
0.926428
0.856621
0.442084
0.90071
0.96237
0.925465
0.847987
0.925407
0.997106
0.974074
0.455844
0.878278
0.89245
0.999326
0.845838
0.998647
0.922864
0.893552
0.459844
0.983608
0.452491
0.766603
0.857161
0.98683
0.888525
0.868475
0.915778
0.998182
0.0867955
0.769016
0.912791
0.986393
0.836894
0.924978
0.996159
0.997874
0.997991
0.753628
0.986156
0.986264
0.912799
0.875913
0.778992
0.922271
0.89861
0.805148
0.998413
0.983977
0.937405
0.860641
0.740902
0.924836
0.997875
0.938173
0.999667
0.998111
0.38497
0.997349
0.998648
0.915066
0.508426
0.998355
0.997386
0.804257
0.782983
0.168244
0.859572
0.752461
0.996806
0.997634
0.998929
0.999576
0.587715
0.813413
0.633787
0.869556
0.780434
0.206435
0.922729
0.999147
0.0543892
0.880576
0.852454
0.676484
0.997786
0.799982
0.454048
0.998598
0.922859
0.255215
0.998369
0.980799
0.768851
0.984108
0.998702
0.999415
0.860603
0.923179
0.880698
0.998929
0.847331
0.567664
0.998747
0.986212
0.914456
0.983918
0.787563
0.99881
0.888002
0.488512
0.987269
0.222266
0.99835
0.974459
0.856877
0.998452
0.985809
0.950117
0.298958
0.92802
0.998392
0.998953
0.513917
0.875001
0.999507
0.78003
0.984831
0.845042
0.847876
0.998072
0.889342
0.986141
0.999357
0.903205
0.921013
0.925262
0.914241
0.860108
0.998561
0.997144
0.44038
0.775874
0.925796
0.823441
0.998126
0.644698
0.695123
0.997477
0.997739
0.960281
0.999205
0.876238
0.692243
0.998954
0.846673
0.994129
0.982946
0.913084
0.846189
0.902999
0.977071
0.926678
0.832858
0.457836
0.859354
0.856648
0.911318
0.735665
0.754279
0.145684
0.82679
0.618354
0.999122
0.393789
-0.0302981
0.831757
0.955671
0.128643
0.91428

## Sheet: d60
cbc
0.489862
0.222625
0.167895
0.959065
0.683432
0.341724
0.301848
0.764483
0.460506
-0.0703377
0.232383
0.160519
0.46091
0.857728
0.0596856
0.949818
0.866962
0.994602
0.714816
0.222038
0.372627
0.840275
0.162317
0.76719
0.870413
0.928088
0.878989
0.56144
0.436971
0.158185
0.384675
0.777616
0.405523
0.949347
0.156096
0.983777
0.290631
0.874904
0.758845
0.276876
0.704263
0.634276
0.819718
0.875202
0.407217
0.232794
0.160485
0.374094
0.880894
0.240065
0.892535
0.395491
0.373976
0.95923
0.947934
0.8128
0.562653
0.376853
0.385669
0.170516
0.787503
0.793822
0.443404
0.893104
0.232252
0.0154882
0.459908
0.358972
0.509215
0.743044
0.994904
0.745562
0.374981
0.813008
0.37317
0.484617
0.509536
0.629335
0.911801
0.682191
0.812666
0.803508
0.67475
0.160398
0.370007
0.846282
0.963161
0.395134
0.43683
0.914407
0.995461
0.369606
0.320282
0.78125
0
0.914461
0.760101
0.875898
0.577282
0.374846
0.236447
0.668183
0.863041
0.878295
0.835617
0.56473
0.373648
0.458471
0.910579
0.274201
0.28461
0.803678
0.847872
0.170945
0.961759
0.545667
0.384965
0.888559
0.104456
0.565465
0.293146
0.757735
0.308013
0.98331
0.242866
0.296833
0.471766
0.560817
0.243361
0.846459
0.881799
0.449136
0.0167771
0.775301
0.404542
0.69836
0.232296
0.634462
0.587323
0.387884
0.823766
0.14645
0.722352
0.858095
0.233008
0.363706
0.888301
0.292137
0.384148
0.170751
0.9375
0.356691
0.982946
0.815553
0.510064
0.232422
0.792063
0.744122
0.873757
0.429608
0.519811
0.987819
0.811866
0.812115
0.460573
0.622331
0.955194
0.800971
0.874742
0.805097
0.833002
0.146469
0.909424
0.140223
0.977036
0.843401
0.170831
0.319417
0.356409
0.997312
0.74382
0.213888
0.320106
0.719521
0.839265
0.17077
0.258996
0.718333
0.575002
0.462416
0.819458
0.728963
0.369898
0.376858
0.0602002
0.91397
0.417545
0.890855
0.810306
0.746817
0.517871
0.362874
0.80542
0.334765
0.676479
0.963081
0.844267
0.409416
0.232391
0.752007
0.377751
0.851784
0.644446
0.833905
0.374134
0.297242
0.432036
0.135307
0.765099
0.819125
0.341978
0.170842
0.790134
0.396261
0.200448
0.43094
0.0269974
0.826318
0.911761
0.914324
0.767863
0.545256
0.983161
0.780044
0.950948
0.447904
0.748793
0.855733
0.38793
0.170477
0.760495
0.691407
0.35826
0.459437
0.91366
0.517914
-0.163149
0.359217
0.0597146
0.611906
0.545642
0.962302
0.853533
0.219177
0.0154957
0.985091
0.206865
0.455264
0.386101
0.956443
0.837165
0.891992
0.533403
0.985518
0.971566
0.377375
0.170213
0.925597
0.99492
0.232823
0.232454
0.49119
0.371094
0.713606
0.757131
0.387
0.39454
0.297445
0.297463
0.273969
0.66383
0.677307
0.839904
0.499156
0.305071
0.9629
0.156504
0.995166
0.984031
0.622708
0.555802
0.776915
0.755467
0.770887
0.945785
0.471555
0.406845
0.780074
0.504617
0.0154834
0.828928
0.9514
0.538694
0.497905
0.818662
0.385588
0.73952
-0.0756311
0.758101
0.84665
0.471371
0.202086
0.87744
0.478368
0.297479
0.811269
0.160505
0.0154747
0.865852
0.580136
0.772038
0.0570236
0.558097
0.200104
0.460486
0.236322
0.95903
0.801626
0.463446
0.0598529
0.775913
0.57599
0.488277
0.460314
0.808152
0.12563
0.846826
0.869294
0.871751
0.373583
0.206426
0.395597
0.394387
0.268523
0.986763
0.871984
0.459172
0.232244
0.254486
0.356254
0.855342
0.811326
0.729391
0.243671
0.437643
0.459516
0.459302
0.687899
0.961262
0.200774
0.822351
0.391352
0.818003
0.437491
0.36001
0.792404
0.804979
0.963526
0.763131
0.515907
0.0269962
-0.266568
0.892433
0.886308
0.504644
0.813119
0.925225
0.833242
0.0457788
0.34074
0.195926
0.500334
0.712494
0.435641
0.676617
0.731928
0.18986
0.408713
0.168072
0.665988
0.879457
0.31459
0.17142
0.926395
0.961965
0.887557
0.922407
0.787016
0.0154973
0.678724
0.321018
0.823439
0.853032
0.356634
0.29738
-0.356718
0.309322
0.959782
0.743705
0.837853
0.240062
0.913428
0.563114
0.79215
0.408689
0.777546
0.732498
0.291791
0.836971
0.859467
0.742926
0.513273
0.987092
0.866215
0.975554
0.710721
0.788028
0.314499
0.646875
0.406687
0.878151
0.912328
0.0485494
0.83376
0.538162
0.362304
0.44799
0.768107
0.258074
0.533312
0.846468
0.460022
0.304343
0.767741
0.868311
0.314274
0.441066
0.900976
-0.206354
0.437549
0.424839
0.714062
0.160584
0.87888
0.52225
0.406813
0.804945
0.437017
0.476985
0.79264
0.15795
0.732402
0.460801
0.961941
0.913686
0.805227
0.855164
0.913384
0.146609
0.728677
-0.152944
0.498984
0.861796
0.221821
0.399377
0.96281
0.202406
0.442049
-0.483719
0.167638
0.879961
0.314731
0.491064
0.72241
0.791559
0.844911
0.970909
0.428212
0.985455
0.395827
0.647816
0.912552
-0.13588
0.752559
0.384664
0.923357
0.340428
0.886325
0.847246
0.722641
0.694874
0.870968
0.55293
0.801977
0.560668
0.157045
0.015462
0.474212
-0.0216435
0.524777
0.633373
0.631999
0.182169
0.810833
0.219213
0.986697
0.719443
0.387585
0.170626
0.0466631
0.996839
0.200408
0.232351
0.487194
0.015496
0.460762
0.757194
0.839249
0.98605
0.386219
0.406713
0.951926
0.731831
0.975655
0.852487
0.358291
0.503723
0.947549
0.986529
0.855968
0.0502329
0.995428
0.925451
0.856879
0.877626
0.88939
0.0952257
0.75398
0.698295
0.822937
0.0270183
0.818503
0.630242
0.388052
0.232177
0.912081
0.743882
0.860715
0.800609
-0.232115
-0.129313
0.823104
0.914193
0.526332
0.799976
0.490345
0.406851
0.46119
0.514968
0.0270105
0.963435
0.341312
0.460798
0.998443
0.936046
0.746504
0.892541
0.258498
0.58937
0.802205
0.522062
0.461225
0.471861
0.656774
0.914318
0.425169
0.401534
0.657749
0.618249
0.449081
0.683786
0.981035
0.417152
0.685079
0.471171
0.303305
0.785583
0.291394
0.243557
0.170807
0.107444
0.986483
0.846644
0.462298
0.46517
0.243503
0.881056
0.437697
0.804874
0.21887
0.962206
0.857362
0.341222
0.390706
0.157532
0.633093
0.377096
0.771367
0.232356
0.912761
0.461686
0.810716
0.855059
0.799212
0.461647
0.377215
0.20181
0.483499
0.774696
0.96167
0.224008
0.816833
0.752304
0.503779
0.605336
0.691675
0.801048
0.935055
0.800489
0.787074
0.168369
0.015465
0.4093
0.460719
0.568756
0.79248
0.37558
0.405986
0.746448
0.78734
0.359552
0.995004
0.376856
0.488664
0.243575
0.970197
0.200173
0.395962
0.854497
0.358807
0.460399
0.200658
0.387202
0.778023
0.0488565
0.874267
0.522112
0.194117
0.340782
0.89963
0.986957
0.608275
0.821633
0.911302
0.635418
0.791613
0.232737
0.01548
0.87819
0.858963
0.81255
0.949049
0.995611
0.833988
0.442505
0.889386
0.352681
0.611578
0.869868
0.497256
0.146124
0.610458
0.356884
0.924055
0.441077
0.146868
0.381736
0.870344
0.221454
0.9266
0.608288
0.232812
0.558168
0.225223
0.698476
0.813446
0.805256
0.503758
0.683041
0.355992
0.620804
0.810502
0.836698
0.347077
0.484631
0.839104
0.525837
0.948478
0.909789
0.357736
0.613304
0.703201
0.67863
0.962241
0.00568064
0.835711
0.759761
0.949969
0.195917
0.668466
0.207649
0.870873
0.377123
0.387924
0.170755
0.519555
0.471649
0.752575
0.340574
0.258043
0.903368
0.845258
0.731151
0.853662
0.949917
0.258821
0.0570669
0.920602
0.660017
0.0154835
0.453397
0.460351
0.377263
0.837612
0.913065
0.962134
0.363865
0.832315
0.0154739
0.820796
0.0597957
0.405075
0.0571451
0.752316
0.12881
0.888233
0.404973
0.269942
0.868193
0.841265
0.404771
0.853196
0.90243
0.460234
0.926896
0.168267
0.68661
0.376862
0.841375
0.773102
0.449219
0.985826
0.253958
0.905875
0.704027
0.876636
0.81062
0.378398
0.170593
0.875697
0.395936
0.356489
0.146271
0.886401
0.435831
0.146469
0.851094
0.17065
0.36318
0.232793
0.309625
0.397404
0.710339
0.160307
0.146566
0.867166
0.875034
0.901216
0.986076
0.514395
0.14593
0.290958
0.113981
0.961962
0.659856
0.36432
0.812884
0.0947452
0.395629
-0.26659
0.891319
0.190704
0.376978
0.911832
0.339755
0.4531
0.442349
0.842508
0.467454
0.405693
0.213492
0.883307
0.388004
0.525821
0.842073
0.356438
0.297331
-0.149252
0.733687
0.905883
0.13923
0.39567
0.291286
0.790608
0.80404
0.778016
0.460609
0.363424
0.711587
0.460359
0.314979
0.892844
0.756279
0.98244
0.961456
0.472248
0.405337
0.0154791
0.934852
0.861309
0.543668
0.963057
0.544487
0.987208
0.963311
0.277515
0.730226
0.643691
0.341666
0.314715
0.633491
0.778686
0.466273
0.545058
0.562734
0.157621
0.890411
0.376999
0.305188
-0.0397427
0.427798
0.356919
0.341034
0.160554
0.207135
0.92673
0.850315
0.17057
0.146089
0.805789
0.961243
0.869088
0.47638
0.779421
0.407935
0.937019
0.882373
0.657517
0.872246
0.523551

## Sheet: d80
cbc
0.813916
0.0163207
-0.458779
-0.620061
0.431268
0.266526
0.305667
0.738522
0.950378
0.207214
0.129407
0.773265
0.0954471
0.0765765
-0.387812
0.778047
-0.22437
-0.489184
-0.548822
0.743554
-0.60077
0.561177
-0.652623
-0.502564
0.721666
0.45368
-0.556039
0.549065
-0.548305
0.78421
-0.29798
-0.602228
-0.529088
-0.474461
0.898008
-0.518898
-0.420588
-0.0933241
0.321845
-0.573922
-0.593482
0.643806
0.746351
-0.482604
-0.482426
-0.34115
-0.633489
-0.554731
-0.633426
-0.686845
-0.464231
-0.396508
0.982631
0.820088
0.638305
-0.65161
0.974339
-0.60552
-0.549562
-0.325616
0.85675
-0.442311
-0.517701
0.397543
-0.683716
0.248898
-0.593672
-0.581702
-0.437863
0.901361
-0.389699
-0.269836
-0.429429
-0.62514
0.421369
0.844043
-0.619322
-0.531066
-0.553365
0.404823
0.597931
-0.522231
-0.218482
-0.601249
0.0564921
-0.267249
-0.729826
0.157079
-0.442038
-0.519267
0.913584
-0.602617
0.296274
-0.676481
0.798625
0.151117
-0.546945
-0.397819
-0.482522
0.832676
0.254215
0.392031
0.707142
0.573812
-0.524667
0.39479
-0.347158
-0.518381
-0.51573
0.824815
0.946648
-0.151367
0.730119
0.498082
-0.414265
0.223304
-0.426852
-0.59633
-0.593871
0.657544
-0.703194
0.763987
-0.724462
0.811994
0.794557
-0.557896
-0.532266
-0.614113
-0.00506854
0.802018
-0.489689
-0.477961
0.325927
0.196604
-0.56346
-0.645158
0.756492
-0.428776
0.211547
-0.546461
-0.438311
-0.584766
-0.0761325
0.109332
0.687255
-0.641719
-0.00506423
-0.478919
0.688794
-0.474801
-0.419279
0.369092
-0.588828
-0.481377
-0.130421
-0.392072
0.464358
-0.566146
0.798778
-0.490945
0.734794
-0.524182
0.696049
0.411335
0.0724835
0.00542166
-0.564407
0.244621
-0.0595744
-0.496642
0.61645
-0.631034
0.723716
-0.474842
-0.598686
0.802049
0.265214
-0.417459
-0.330196
0.146208
-0.428826
0.666402
-0.145806
-0.463737
-0.565584
-0.546112
-0.546487
0.685647
0.398176
-0.633039
-0.178927
-0.428692
0.211485
0.788784
-0.565246
0.513972
0.452514
-0.440852
-0.521771
-0.626512
0.9722
-0.425743
-0.613896
-0.438811
-0.638196
0.386369
0.976113
-0.465221
-0.428884
-0.629967
-0.109568
0.221343
-0.47433
-0.517024
-0.494793
0.140371
-0.00542291
0.520855
0.429198
0.0337441
-0.727648
-0.414807
-0.604125
0.827333
0.87612
0.00562966
0.84292
-0.00507058
0.105948
-0.0676755
-0.524793
0.740726
-0.436891
0.846292
-0.547174
0.634264
-0.42846
0.773453
-0.425674
0.407362
-0.459987
0.0397079
-0.124616
-0.475258
-0.607309
-0.267805
-0.650757
0.555962
-0.473532
-0.420241
-0.0706232
-0.417047
-0.157408
0.543489
-0.304965
-0.267508
-0.567741
0.878761
-0.494915
0.879905
0.553945
-0.474725
-0.607865
0.567954
-0.564247
-0.487526
-0.494535
0.580812
0.691185
-0.442842
0.974191
-0.521314
0.634884
-0.69426
0.701336
-0.174621
0.809736
0.21171
0.823571
0.594869
0.207263
-0.608557
-0.709236
-0.0379025
-0.246785
0.843789
0.022039
-0.516866
0.578267
-0.048741
-0.128887
-0.479995
0.356596
0.298784
0.372715
-0.284488
-0.160593
-0.774326
0.910685
0.498772
0.731806
-0.606144
0.683687
-0.591365
-0.466585
-0.56235
0.722957
0.308999
-0.428341
-0.49825
0.7771
-0.500973
0.441591
0.834713
-0.441524
-0.109915
0.35189
-0.580682
-0.0795036
-0.621512
-0.44434
-0.545832
0.348401
-0.604805
-0.596506
-0.586746
-0.393007
-0.549943
-0.520707
0.2852
0.25497
0.8249
0.812491
-0.473972
-0.633456
0.248469
0.744711
-0.513152
-0.414473
0.095567
0.898383
0.719613
-0.428692
-0.600699
0.460585
0.562709
-0.28948
-0.566658
-0.495198
-0.304823
-0.433139
-0.287769
-0.00543014
-0.464947
-0.675498
0.877799
0.570864
0.368335
-0.442385
0.140933
-0.471115
0.420125
-0.600346
-0.706514
-0.408409
-0.545784
-0.599618
-0.542958
0.370506
-0.491173
0.635393
0.889787
-0.56396
0.213911
-0.502535
-0.117479
-0.522243
-0.488791
-0.513608
-0.152654
0.405181
-0.651708
0.513773
-0.413933
-0.254846
0.74252
-0.553483
0.00565102
0.860755
-0.432193
0.521438
-0.28993
0.644369
-0.572625
-0.449464
0.0162807
0.709394
-0.437746
0.605953
0.834173
0.796564
-0.335348
-0.591581
0.0336873
-0.442475
0.315675
0.00563486
0.892059
0.729972
-0.545967
-0.589901
-0.0487577
0.384358
0.94743
0.643734
0.441723
0.482367
-0.565596
-0.608177
-0.382155
0.32128
-0.0559482
-0.481873
-0.503191
-0.595844
-0.264224
-0.642726
-0.502612
-0.531357
0.346484
0.441132
-0.325123
0.640271
0.695604
0.944795
-0.65211
-0.526498
-0.438418
0.14047
-0.279013
-0.51876
0.605357
-0.475175
-0.554662
-0.257677
-0.56501
0.590389
-0.106177
0.458174
-0.442984
-0.46378
-0.409303
-0.657801
-0.0486969
-0.519381
-0.438017
-0.00845213
-0.137307
-0.518336
0.0842404
0.662659
-0.614012
0.477018
-0.426282
-0.413661
0.0659731
-0.455076
0.114946
-0.610527
0.70859
0.564417
0.869815
0.540976
-0.502895
-0.510296
0.78203
0.077879
-0.55035
0.381562
-0.5534
-0.0271588
0.780549
-0.478225
-0.552545
0.923104
-0.554792
-0.437107
0.603094
-0.264251
0.571031
-0.607348
-0.438373
-0.514669
0.45289
-0.43105
-0.471993
-0.583725
-0.19104
-0.257613
-0.748566
-0.488333
0.0962609
-0.0616132
-0.472069
-0.437802
-0.6015
-0.264225
-0.563806
0.674412
-0.59019
-0.0280881
0.724193
-0.456634
-0.552475
-0.55667
-0.459118
0.219639
-0.0170029
-0.52437
0.708729
0.820859
-0.0416202
-0.429395
-0.308632
0.44451
-0.634123
0.823444
-0.52516
0.18594
0.643925
0.199747
-0.649469
0.471652
0.753799
-0.592881
0.255446
-0.501505
0.71521
-0.436938
-0.554831
0.556137
-0.502386
-0.428766
0.633447
0.5683
-0.414138
0.157134
0.852973
0.578031
-0.652206
-0.647437
0.826974
-0.58097
-0.246814
-0.532467
-0.536892
-0.238478
-0.242387
0.112128
-0.588612
0.578309
-0.582584
0.682389
-0.388229
0.321398
0.477243
-0.236385
0.00563924
0.308738
0.778759
-0.621249
0.0923178
0.608097
-0.195992
0.871944
-0.563763
0.974353
-0.601437
0.946665
-0.731386
0.8888
-0.534476
-0.583208
-0.522295
-0.517235
-0.625097
0.661415
-0.264604
-0.594025
-0.503354
-0.41437
0.7769
0.176141
-0.479132
0.243988
-0.549283
0.456201
-0.0465026
0.106251
-0.414298
-0.157421
0.791718
-0.441544
-0.615243
-0.595308
0.0464674
-0.64129
0.63194
-0.438128
0.574206
-0.0486978
-0.431268
-0.499713
-0.318686
0.754535
-0.407661
-0.490979
-0.608501
-0.505958
-0.482513
0.645884
0.0279744
0.766139
-0.325143
-0.559014
-0.565845
-0.436824
0.206972
-0.0567527
0.745088
0.733962
0.0843465
-0.491873
0.690498
-0.0354624
-0.565008
-0.216918
0.923862
-0.518905
0.710813
-0.716766
0.263541
0.270227
0.594848
-0.622957
0.254985
-0.547292
0.308681
0.569362
-0.594343
-0.238938
-0.606598
-0.520632
-0.502144
0.546976
-0.441679
-0.518306
0.862912
-0.634387
0.477646
-0.500555
0.684208
-0.528392
-0.513161
0.385919
-0.456046
0.791977
0.351988
-0.642292
-0.562365
0.75314
-0.345887
-0.571571
-0.113683
0.89448
-0.471498
-0.593415
0.287313
0.481039
-0.564122
-0.399536
0.566221
0.787059
0.0596153
-0.563368
-0.436776
0.565382
-0.581103
-0.581805
0.0897566
-0.46031
-0.481897
0.129428
-0.47345
-0.597499
-0.401485
-0.640769
0.412779
-0.415169
0.0660043
-0.623422
0.946368
0.899745
0.146414
-0.429086
-0.521279
-0.548508
-0.413785
-0.513518
0.211829
-0.387788
0.26695
0.809835
0.406118
-0.597941
-0.206224
0.595063
-0.327823
-0.546991
-0.548234
0.864432
0.824549
0.295849
0.963107
0.667473
-0.461448
-0.582684
0.363328
-0.555932
0.605819
-0.437954
0.103128
0.537695
0.375084
-0.379525
-0.588677
-0.44201
0.619422
0.712539
-0.296427
-0.326017
0.4646
-0.622981
-0.320454
-0.624544
-0.446497
0.640216
-0.609835
-0.610678
-0.179191
-0.652073
-0.388264
0.160135
0.373518
-0.448949
-0.496267
0.00560039
0.498054
0.461473
-0.406907
-0.565941
-0.613137
0.225582
0.638708
-0.539091
-0.38486
0.575151
-0.648071
-0.592648
-0.631861
-0.18111
-0.544471
-0.495075
-0.483938
-0.632087
-0.56112
0.136155
-0.263948
0.732053
0.86846
0.76688
0.538567
-0.554928
0.901338
-0.607265
-0.429571
0.531731
0.676793
0.485047
0.470929
0.224186
-0.361403
-0.5526
0.594589
0.902299
-0.0465284
-0.527972
-0.413662
-0.49499
0.872768
-0.55066
0.662575
0.334319
-0.426248
-0.675922
-0.608532
-0.414046
-0.216401
-0.157134
0.941888
0.392395
0.106614
-0.180238
0.124179
-0.479138
0.278911
-0.545293
-0.417038
-0.0282852
-0.536997
0.420299
0.484473
-0.627041
0.789332
0.151186
-0.634492
-0.571221
-0.555039
-0.502459
-0.635518
-0.612301
-0.0566181
-0.401711
-0.524807
0.103513
-0.0486609
-0.572335
0.683151
0.197367
-0.55697
-0.56491
-0.402204
-0.494868
-0.427702
-0.391122
0.0775627
-0.191893
-0.718117
-0.60072
-0.156471
0.243516
-0.501228
0.246489
0.737894
0.468596
-0.464641
0.959995
-0.601379
0.562652
0.568579
-0.564939
-0.451507
-0.45412
0.643335
-0.523306
-0.431437
-0.553125
0.84535
-0.692101
-0.569426
0.222823
0.640352
-0.0485522
-0.552035
0
-0.454539
0.486552
-0.685724
-0.358778
-0.495418
-0.391152
-0.371389
0.119549
0.0542728
0.834351
-0.0270699
-0.698203
-0.00506972
0.38115
-0.466783
0.0397597
-0.429428
0.135744
0.151461
0.608549
-0.566172
-0.421875
-0.588969
-0.547137
-0.547952

## Sheet: d100
cbc
-0.636953
-0.251975
-0.670509
-0.675498
-0.391955
-0.727412
0.0271436
-0.217581
-0.664478
-0.0921467
-0.607992
-0.60597
-0.657645
-0.700501
-0.750727
-0.534599
-0.641078
-0.517829
-0.645339
-0.479769
-0.605865
-0.721042
-0.584259
-0.0257751
-0.65534
-0.684679
-0.70727
0.0362758
-0.599577
-0.74285
-0.781233
-0.728205
-0.427567
-0.360608
-0.654726
-0.611293
-0.30173
-0.638753
-0.725367
-0.683572
-0.693698
-0.162385
-0.709211
-0.607506
-0.585608
-0.681599
-0.0672137
-0.459102
-0.723889
-0.78134
-0.113346
-0.723191
-0.707237
-0.599564
-0.741149
-0.594986
-0.665562
-0.729531
-0.638573
-0.624944
-0.205991
-0.716763
-0.613501
-0.646434
-0.585225
-0.575956
-0.766915
-0.72852
-0.705171
-0.655274
-0.597656
-0.636336
-0.69288
-0.537122
-0.742105
-0.569094
-0.755521
-0.708557
-0.637469
-0.558262
-0.58353
0.336256
-0.684077
-0.655078
-0.590081
-0.703305
-0.690461
-0.806621
-0.711289
-0.607846
-0.499837
-0.535544
-0.61457
-0.654671
0.554214
-0.711336
-0.695083
-0.708538
0.547815
-0.706711
-0.663119
-0.686225
-0.794471
-0.606877
-0.310241
-0.258804
-0.476178
-0.657368
-0.630063
-0.607989
-0.606009
0.577385
0.52825
-0.69016
-0.643232
-0.662831
-0.584434
0.200397
-0.585096
-0.697699
-0.692991
-0.590784
-0.645277
-0.593988
0.600829
-0.711032
-0.662706
0.788858
-0.640735
-0.547623
-0.583874
0.207445
-0.59906
-0.629361
-0.54409
0.431976
-0.593736
-0.607625
-0.482426
-0.64854
-0.819207
-0.693925
-0.637895
-0.691985
-0.621587
-0.592208
-0.585243
-0.678294
-0.630939
-0.710969
-0.360847
-0.680225
-0.640794
-0.761107
-0.478378
-0.677197
-0.753786
0.599208
-0.711107
-0.657966
-0.641249
-0.701911
-0.401924
-0.623735
0.839669
-0.683292
-0.648404
-0.244735
0.528551
-0.609389
0.527681
-0.287307
-0.615376
-0.609088
-0.577738
-0.533693
-0.206467
-0.441521
-0.656737
-0.719799
-0.67887
0.221835
-0.576646
-0.637038
-0.711002
-0.609888
-0.592691
-0.599603
-0.64103
-0.624396
-0.414792
-0.577353
-0.171568
-0.664887
-0.794611
-0.43041
-0.732652
-0.28362
-0.716065
-0.661111
-0.712825
-0.428614
-0.445864
-0.616476
-0.700061
-0.649583
-0.629887
-0.700704
0.204616
-0.575369
-0.681839
-0.764304
0.656145
-0.639281
0.680843
-0.610511
-0.712232
-0.77512
0.27406
-0.690216
-0.638317
-0.691387
-0.638567
-0.676371
-0.776545
-0.650739
-0.470357
-0.297214
0.151523
-0.302212
-0.638759
-0.593299
-0.653718
-0.60335
-0.57777
-0.764647
-0.384495
-0.671595
-0.690822
-0.638726
-0.712362
-0.623978
-0.756803
-0.592114
-0.641181
-0.606966
-0.795277
-0.349753
-0.629415
-0.332462
-0.66244
0.287075
-0.680073
-0.592877
-0.710488
-0.727329
0.526883
-0.179168
0.864795
-0.7269
-0.708307
-0.654472
0.807071
-0.6242
-0.641009
-0.615135
-0.700693
0.465736
-0.467167
-0.637102
-0.0828851
-0.721245
-0.573396
-0.703358
-0.573793
-0.591156
-0.708876
-0.614904
-0.654379
-0.696739
0.512301
-0.645758
-0.509969
-0.733708
-0.617039
-0.673537
-0.651358
-0.656991
0.6631
-0.637975
-0.69011
-0.677517
0.00518777
-0.690581
-0.67893
-0.593106
-0.408468
-0.731398
-0.39581
-0.640379
0.868054
-0.500042
-0.732509
-0.572698
-0.68029
-0.721537
-0.641293
-0.326561
-0.606351
-0.63072
-0.592474
-0.615298
-0.640881
-0.714307
0.755769
-0.710514
-0.760463
-0.585719
-0.604438
-0.795352
-0.739916
0.631657
-0.709538
-0.679818
-0.592816
-0.649535
-0.698366
0.890429
0.245755
-0.689024
-0.686279
-0.693212
-0.645459
-0.701105
-0.616652
-0.70231
-0.657787
-0.662615
-0.139599
-0.67943
-0.278799
0.0112653
-0.74068
-0.673266
0.262841
-0.687633
-0.681733
-0.701492
-0.638285
-0.658927
-0.713379
-0.754175
-0.216436
-0.576886
-0.699686
0.0948289
-0.757706
-0.647035
-0.719565
0.298429
-0.637765
-0.745881
-0.726017
-0.718399
-0.734791
-0.719525
-0.673822
-0.1027
-0.758332
-0.644401
-0.689297
-0.63727
-0.655371
-0.684323
-0.690137
-0.354343
-0.766624
0.907809
-0.622351
0.187461
-0.697949
-0.700063
-0.762631
-0.654548
0.0465886
-0.711986
-0.600199
-0.62292
-0.0877278
-0.715956
-0.393057
-0.60813
-0.591572
-0.617328
-0.601266
-0.674678
-0.627962
-0.593161
0.135645
0.252256
-0.64856
-0.688403
0.536389
-0.610532
-0.470923
-0.714619
-0.60886
-0.690852
-0.678959
-0.594101
-0.690569
-0.645752
-0.592694
-0.710387
-0.655278
-0.682845
-0.606525
-0.610505
-0.784186
-0.649008
-0.687317
-0.574252
-0.771342
-0.773108
-0.0877809
-0.727081
-0.733003
-0.0994845
-0.586486
-0.774894
-0.143927
-0.68549
-0.700395
-0.578009
-0.587649
-0.607462
-0.320165
-0.730031
-0.682457
-0.643735
-0.654424
-0.666498
0.160496
-0.742045
-0.600049
-0.62938
-0.687797
-0.708233
-0.600371
-0.692397
-0.645311
-0.685278
-0.692683
-0.6679
0.813002
-0.616738
-0.437029
-0.121898
-0.679628
-0.591766
-0.669237
-0.644007
0.247573
-0.635573
-0.68812
-0.620745
-0.700238
-0.608002
0.168321
-0.585774
-0.4438
-0.728403
-0.726785
0.578292
0.692685
-0.711285
-0.656989
0.498821
-0.536515
-0.51179
-0.667588
-0.66951
-0.617274
-0.691399
-0.597526
-0.656512
-0.637253
-0.636074
-0.476911
-0.614479
-0.607645
-0.691223
-0.692646
-0.0507952
-0.593907
-0.282254
-0.713176
-0.608996
-0.756553
-0.762854
0.150703
-0.654517
-0.666377
-0.664332
-0.391502
-0.677408
-0.702771
-0.729503
-0.662505
-0.656116
-0.646087
-0.775231
-0.584509
-0.641197
-0.712565
-0.636224
-0.259087
-0.63639
-0.646347
-0.679346
-0.592832
-0.710439
-0.70494
-0.616048
-0.607201
-0.551703
-0.736307
0.803906
-0.631375
-0.647981
-0.656726
-0.692263
-0.714218
-0.654713
-0.72672
-0.60716
-0.662269
-0.797987
-0.64067
-0.599849
-0.636435
-0.692072
-0.678081
-0.727485
0.232472
-0.687426
-0.139611
-0.597022
-0.600668
-0.374118
-0.654187
0.592343
-0.763768
-0.728224
-0.638431
-0.763142
-0.322938
-0.742606
-0.214633
-0.242618
-0.615661
-0.721717
-0.630001
-0.694026
-0.599028
-0.64121
-0.627468
-0.714928
-0.287888
-0.677828
-0.705199
-0.431292
0.179434
-0.677042
-0.691084
-0.621242
0.804416
-0.591684
-0.608011
-0.613489
-0.607936
-0.685768
0.59454
-0.640011
-0.614429
-0.64777
-0.607892
-0.696697
-0.640828
-0.679141
-0.703277
-0.561259
-0.690869
-0.662881
-0.396506
-0.673777
-0.656826
-0.0876125
-0.590374
-0.0140348
-0.758218
-0.617807
-0.72241
-0.616561
-0.623916
-0.677709
0.731915
-0.701789
-0.639572
-0.655226
-0.630279
-0.649031
-0.647329
-0.634761
-0.621207
0.196319
-0.543094
-0.253134
-0.691629
-0.585112
-0.625011
-0.703036
-0.708626
-0.670093
-0.682725
-0.0332321
-0.217621
-0.64296
-0.694501
-0.644996
-0.608903
-0.674353
-0.698378
-0.687731
-0.629739
-0.617249
-0.637097
-0.709365
-0.682367
-0.711483
-0.691053
-0.616711
-0.649339
-0.666937
0.207401
-0.27693
-0.668123
-0.630437
-0.141978
-0.60764
-0.74237
-0.715428
-0.584496
-0.786177
-0.406541
-0.428347
-0.640284
-0.58362
-0.6539
-0.65671
-0.5936
-0.632359
-0.608428
-0.643893
-0.593195
-0.764487
-0.683783
-0.715981
-0.621166
-0.70126
-0.466826
-0.608406
-0.747304
-0.709825
-0.0152489
-0.465514
-0.373838
-0.848889
0.208273
-0.590983
-0.640447
0.217008
-0.698874
-0.599776
-0.624051
-0.242476
-0.691776
-0.605409
-0.662667
-0.350173
-0.551936
0.39657
-0.766216
-0.636129
-0.414119
-0.691625
-0.56372
-0.470472
-0.788491
-0.672138
-0.138701
-0.582021
-0.685098
0.357519
-0.585133
-0.36184
-0.602388
-0.736731
-0.674154
-0.600287
-0.73881
-0.649679
0.1382
0.364229
-0.575075
-0.620885
-0.683246
0.407214
-0.27661
-0.675264
-0.0970372
-0.381144
-0.693656
-0.654054
-0.613042
-0.662519
-0.645667
-0.728204
-0.583181
-0.662374
-0.657817
-0.244667
-0.607796
-0.75459
-0.249066
-0.630338
-0.764288
0.170865
-0.714419
-0.68482
-0.638201
-0.654499
-0.767289
-0.654192
-0.691773
-0.592306
-0.415046
-0.637552
-0.594852
0.0666064
0.00510309
-0.681374
-0.64478
-0.276525
-0.66459
-0.719212
-0.701833
-0.502067
-0.750152
-0.765673
-0.651263
-0.64086
-0.452273
-0.709422
-0.691199
-0.592397
-0.595986
-0.632886
-0.749035
-0.60723
-0.448995
-0.691411
-0.654334
-0.690267
-0.754677
-0.758099
-0.576809
0.0362201
-0.631183
0.808512
-0.675113
-0.624239
-0.656253
-0.63078
-0.106612
-0.577482
-0.640993
-0.327282
-0.718693
-0.720262
-0.621626
-0.585083
-0.785586
-0.478248
-0.0103635
0.264323
-0.727667
-0.688529
-0.71063
-0.600164
-0.695927
-0.663137
-0.342651
0.239164
-0.728649
0.211135
0.239626
-0.291533
-0.702007
-0.0508622
-0.649633
-0.623445
-0.698777
-0.693424
-0.654737
0.826058
-0.707487
-0.330008
-0.410089
-0.593531
-0.583572
-0.576923
-0.600483
-0.662457
-0.609011
-0.570662
-0.681779
-0.72265
-0.681944
-0.682801
-0.590018
-0.704638
-0.543518
-0.615935
-0.638797
-0.599722
0.200218
-0.693211
-0.717485
-0.388567
-0.418712
-0.726499
-0.607473
-0.689747
-0.709932
0.53726
-0.701543
-0.638542
-0.629471
-0.67728
-0.763242
-0.616315
-0.686027
-0.616706
-0.696004
-0.646035
-0.65644
-0.576213
-0.689665
-0.697846
0.587537
-0.646137
-0.334491
-0.632152
-0.710374
-0.639326
-0.63668
-0.638031
-0.649676
-0.622319
-0.657666
-0.779645
-0.579406
-0.707799
-0.695457
-0.70376
-0.449344
-0.7389
-0.592068
-0.698365
-0.674089
-0.708351
-0.680997
-0.619945
-0.0379821
-0.775053
-0.60785
-0.638225
-0.709116
-0.440399
-0.656861
-0.649507
-0.656219
-0.193297
-0.684664
-0.704548
-0.655122
-0.638606
-0.690214
-0.635463

## Sheet: d120
cbc
-0.665349
-0.648488
-0.716153
-0.610188
-0.541232
-0.533092
-0.627036
-0.726381
-0.482003
0.239525
-0.727888
-0.608255
-0.535332
-0.546945
-0.565374
-0.631152
-0.556194
-0.607574
-0.69424
-0.656976
-0.608501
-0.564595
-0.121024
-0.598367
-0.379571
-0.548868
-0.69279
-0.56452
-0.550718
-0.0228478
-0.42466
-0.599704
-0.630317
-0.32906
0.0127524
-0.631932
0.0887614
-0.597201
-0.541126
-0.5992
-0.710018
-0.531746
-0.624567
-0.715245
-0.475071
-0.535661
-0.688715
-0.555704
-0.6161
-0.649206
-0.531479
-0.602343
-0.649851
-0.644242
-0.682157
-0.481054
-0.475111
-0.700444
-0.534649
-0.525483
-0.532113
-0.67377
-0.48162
-0.580716
-0.0657725
-0.425784
-0.654715
-0.534459
-0.534542
-0.703918
-0.526973
0.263245
-0.548031
0.0510853
-0.566175
-0.700438
-0.647764
-0.729245
-0.556411
-0.652877
-0.221517
-0.640674
-0.547151
-0.482962
-0.610394
-0.483744
-0.306489
-0.595235
-0.654213
-0.617865
-0.546326
0.559023
-0.509145
-0.592481
-0.535532
-0.48262
-0.65482
-0.699647
-0.60761
-0.497041
-0.68558
-0.692605
0.153399
-0.535312
-0.525318
-0.71382
-0.662445
-0.526331
-0.532244
-0.521906
-0.593101
-0.582126
-0.5483
-0.475215
-0.70387
-0.548153
-0.523156
-0.569016
-0.63106
-0.576535
-0.565456
-0.674113
-0.533848
-0.676002
-0.280595
-0.525331
-0.630539
-0.525449
-0.549465
-0.466963
-0.535375
-0.533335
-0.0414598
-0.64433
-0.545048
-0.537096
-0.665286
-0.525376
-0.378476
-0.46706
-0.587683
-0.680319
-0.120615
-0.484587
-0.601009
-0.633295
-0.621654
-0.529453
-0.53201
-0.66714
-0.210804
-0.560528
-0.618465
-0.622857
-0.632948
-0.257921
-0.703712
-0.589242
-0.482008
-0.601212
-0.650127
-0.547141
-0.524889
-0.649207
0.137395
-0.74612
-0.146237
-0.655074
-0.525946
-0.595016
-0.658766
-0.694094
-0.629077
-0.611145
-0.52892
-0.589295
-0.480806
-0.372839
-0.523738
-0.483064
-0.531648
-0.683678
-0.472927
-0.535779
-0.562161
-0.721257
-0.531305
-0.372617
-0.549239
-0.547964
-0.548714
-0.632507
-0.535673
-0.339834
-0.547502
-0.548268
-0.525782
-0.521945
-0.563423
-0.682048
-0.560888
-0.564445
-0.530983
-0.160413
-0.357666
-0.656812
-0.669624
-0.630615
-0.525307
-0.436801
-0.53421
-0.53258
-0.461566
0.396148
-0.735051
-0.69194
-0.524662
-0.614363
-0.549809
0.315914
-0.532712
0.0939022
-0.570526
-0.546298
-0.547001
-0.547503
-0.662253
-0.66349
-0.530882
-0.401806
-0.649659
-0.562677
-0.706857
-0.607271
-0.68006
-0.587615
-0.674806
-0.565626
-0.533147
-0.532123
-0.698227
-0.481334
-0.692825
-0.531392
-0.525561
-0.549332
-0.560378
-0.474734
-0.482423
-0.401919
-0.630183
-0.59509
-0.56059
-0.524474
-0.532209
-0.589486
-0.53281
-0.579712
-0.647742
-0.681367
-0.6051
-0.561369
-0.681502
-0.663575
-0.569527
-0.648499
-0.475135
-0.719884
-0.588224
-0.684386
-0.648848
-0.59309
-0.607941
-0.739232
-0.663315
-0.631268
-0.525892
-0.681471
-0.623584
-0.547158
-0.52509
-0.558963
-0.604893
-0.536258
-0.582934
-0.526395
-0.626658
-0.600503
-0.612385
-0.203644
-0.682305
-0.511412
-0.691472
-0.608063
-0.525603
-0.48111
0.241025
-0.43883
-0.6971
-0.50817
-0.542319
-0.253281
-0.547606
-0.700782
-0.595881
-0.596007
-0.549873
-0.47382
-0.592192
-0.704356
-0.138578
-0.6365
-0.343257
-0.411646
-0.65122
-0.30477
-0.562347
-0.475464
-0.644423
0.0165882
-0.542647
-0.107241
-0.698543
-0.460649
-0.560372
-0.564049
-0.649291
-0.686308
0.139885
-0.587442
-0.433327
-0.541268
-0.550034
-0.546596
-0.623187
-0.561436
-0.632845
-0.647696
0.116395
-0.617854
-0.698789
-0.564373
-0.546272
-0.588039
-0.581024
0.168959
-0.233413
-0.663114
-0.309202
-0.567398
-0.534183
-0.608814
-0.606913
-0.634411
-0.687774
-0.120521
-0.468344
0.437034
-0.476343
-0.617107
-0.442325
-0.526545
-0.526968
-0.690328
-0.468051
-0.522803
-0.565696
-0.565161
-0.482631
-0.278328
-0.526908
0.271998
-0.607918
-0.544028
-0.526578
-0.281202
-0.531974
-0.684499
-0.644236
-0.386604
-0.589369
-0.640585
-0.553326
-0.599641
-0.612923
-0.454489
0.344198
-0.62895
-0.549452
-0.498198
-0.72348
-0.468722
-0.597149
-0.483415
-0.589574
-0.55473
-0.647159
-0.699917
-0.482721
-0.600436
-0.564417
0.00519516
-0.630955
-0.301923
-0.482882
-0.692075
-0.550433
-0.528522
-0.532519
-0.588521
-0.546864
-0.546555
-0.605734
-0.662355
-0.523035
-0.671862
-0.531784
-0.547626
-0.70382
-0.641807
-0.525693
-0.527194
-0.605868
-0.473823
-0.481132
-0.510572
-0.473771
-0.560874
-0.483142
-0.763338
-0.562289
-0.642067
-0.565392
-0.549668
-0.481423
-0.409844
-0.532953
-0.575695
-0.401842
-0.635885
-0.702149
-0.674599
-0.523811
-0.588898
-0.591004
-0.607884
-0.622702
-0.635739
-0.537309
-0.694224
-0.77618
-0.594386
-0.526052
-0.290025
-0.596155
-0.595641
-0.647996
-0.539881
-0.494322
-0.555822
-0.647547
-0.631521
-0.662659
-0.475128
-0.524505
-0.617812
-0.525317
-0.48039
-0.724837
-0.716049
-0.526331
-0.474095
-0.649429
-0.329499
-0.550282
-0.664806
-0.648241
-0.621227
-0.740995
-0.675406
-0.701153
-0.165226
-0.532066
-0.598702
-0.606816
-0.607881
-0.732743
-0.608755
-0.549543
-0.531751
-0.607609
-0.525543
-0.480889
-0.64449
-0.520997
-0.0925203
-0.565319
-0.482228
-0.548567
-0.723158
-0.550204
-0.60743
-0.585702
-0.599582
-0.678664
-0.588108
-0.480424
-0.649486
-0.47491
-0.482951
-0.715077
-0.644745
-0.631749
-0.682955
-0.440034
-0.481723
-0.560058
-0.561874
-0.565697
-0.550401
-0.294916
-0.561967
-0.590942
-0.545516
-0.47546
0.124189
-0.531189
-0.645679
-0.591578
-0.694375
-0.541103
-0.522879
-0.608223
-0.475529
0.0926259
-0.604409
-0.598932
-0.554039
-0.62096
-0.737373
-0.560682
-0.680839
-0.600539
-0.55961
-0.198718
-0.61698
-0.565755
-0.537145
-0.483865
-0.682948
-0.614115
-0.506927
-0.755007
-0.468002
-0.603683
-0.342019
-0.522793
-0.483379
-0.4002
-0.471234
-0.474667
-0.601116
-0.536147
-0.663481
-0.697275
-0.558388
-0.562925
-0.629815
-0.482646
-0.599252
-0.615645
-0.559488
-0.645385
-0.648862
-0.609414
-0.578266
-0.562396
-0.523652
-0.503788
-0.565943
-0.709778
-0.548487
-0.607836
-0.701238
-0.532932
-0.666035
-0.634543
-0.34347
-0.71054
-0.596568
-0.609107
-0.556387
-0.563837
-0.610182
-0.674009
-0.503363
-0.528824
-0.647466
-0.642471
-0.156858
-0.628043
-0.479886
-0.648132
-0.588613
-0.525422
-0.662311
-0.537748
-0.475191
-0.482101
-0.531725
-0.523597
-0.623435
-0.215822
-0.583347
-0.100431
-0.252008
-0.621872
-0.644803
-0.621954
-0.662859
-0.690996
-0.639775
-0.594335
-0.562499
-0.467704
-0.473724
-0.596634
-0.561432
-0.692537
-0.610807
-0.650711
-0.481848
-0.71579
-0.625243
-0.454843
-0.540941
-0.548414
-0.536281
-0.482412
-0.531191
-0.529816
-0.481816
-0.607103
-0.619913
-0.53226
-0.53557
-0.615834
-0.658209
-0.630356
-0.687484
-0.628556
-0.680721
-0.467564
-0.540833
-0.556805
-0.698872
-0.705771
-0.776977
-0.583512
-0.547431
-0.591557
-0.467499
-0.649501
-0.673401
-0.5622
0.286741
-0.639376
-0.756908
-0.523962
-0.572525
-0.563575
-0.481865
-0.719534
-0.160453
-0.341859
-0.127672
-0.474218
-0.530893
-0.601111
-0.607047
-0.481158
-0.561678
-0.570865
-0.54421
-0.627427
-0.648383
-0.622738
-0.529128
-0.53632
-0.524312
-0.577559
-0.618945
-0.525433
-0.56408
-0.532494
-0.676711
-0.610955
-0.59004
-0.482475
-0.547564
-0.602056
-0.595441
-0.488948
-0.473917
-0.525623
-0.466776
-0.627922
-0.644053
-0.688592
-0.615226
-0.474729
-0.640626
-0.532511
-0.54979
-0.689579
-0.588902
-0.0273317
-0.707862
-0.536444
-0.548381
-0.594326
-0.595404
-0.559373
-0.61698
0.355629
-0.523599
-0.618928
-0.673673
-0.563688
-0.527617
-0.200407
-0.606863
-0.244058
-0.468912
-0.664111
-0.596205
-0.326708
-0.48241
-0.0662766
-0.59168
-0.525854
-0.474402
-0.480226
-0.212813
-0.690052
-0.54686
-0.327084
-0.657474
-0.522764
-0.646657
-0.589736
-0.736777
-0.534024
-0.580088
-0.457256
-0.60673
-0.535126
-0.120721
-0.640155
-0.489517
-0.546999
-0.649272
-0.618936
-0.640775
-0.712168
-0.564663
-0.543093
-0.481282
-0.561207
-0.637373
-0.483227
-0.665086
-0.634033
-0.535042
-0.688947
-0.608866
-0.563132
-0.60948
-0.468752
-0.600193
-0.727225
-0.664357
-0.48223
-0.615371
-0.596161
-0.596308
-0.640575
-0.649125
-0.594494
-0.198519
-0.25527
-0.482667
-0.638813
-0.623833
-0.528111
-0.561205
-0.600089
-0.701674
-0.686838
-0.599753
-0.563497
-0.648144
-0.546933
-0.5279
-0.589598
-0.566446
-0.67306
-0.61359
-0.699201
-0.525538
-0.324363
-0.480924
-0.474133
-0.652376
-0.601849
-0.481422
0.703687
-0.654874
-0.0308914
-0.682242
-0.473527
-0.53494
-0.565013
-0.670526
-0.598021
-0.562922
-0.690781
-0.0886728
-0.534263
-0.595557
-0.621544
-0.217899
-0.573919
-0.587571
-0.621916
-0.643393
-0.408705
-0.69342
-0.742628
-0.621308
-0.615784
-0.607813
-0.645847
-0.555605
-0.56101
-0.522736
0.098561
-0.58135
-0.475522
-0.473439
-0.701279
-0.483366
-0.654337
-0.631509
-0.522634
-0.579275
-0.523769
-0.525484
-0.606286
-0.548558
-0.53546
-0.533586
-0.444801
-0.524011
-0.551811
-0.527715
0.529426
-0.311279
-0.709491
-0.535063
-0.258484
-0.608092
0.685266
-0.523606
-0.526514
-0.678075
-0.504263
0.314223
-0.533006
-0.653952
-0.547885
-0.634803
-0.525114
-0.54597
-0.391502
-0.729469
-0.553351
-0.215814
-0.616695
-0.106479
-0.0974493
-0.607737
-0.505688
-0.56679
-0.542505
-0.586823
-0.630657
0.193855
-0.475282
-0.482344

## Sheet: d140
cbc
-0.370621
-0.483272
0.221781
-0.554026
-0.464859
-0.389693
-0.583834
-0.473262
-0.450872
-0.376753
-0.398391
-0.522985
-0.376092
-0.533323
-0.465885
-0.55307
-0.51004
-0.142794
-0.427659
-0.398733
-0.500812
-0.394852
-0.446122
-0.449463
-0.562543
-0.541712
-0.366482
-0.532486
-0.287777
-0.494013
-0.48391
-0.523465
-0.448629
-0.394274
-0.5624
-0.313607
-0.395556
-0.477007
-0.366205
-0.532753
-0.542112
-0.313814
-0.58779
-0.562172
-0.368537
-0.383119
-0.52364
-0.562293
-0.320088
-0.39462
-0.465789
-0.448835
-0.467478
-0.476149
-0.393791
-0.44841
-0.480604
-0.448824
-0.251521
-0.640653
-0.624935
-0.543786
-0.527673
-0.617964
-0.308514
-0.388373
-0.367843
-0.435883
-0.389702
-0.468286
-0.511168
-0.387417
-0.393221
-0.484725
-0.55666
-0.532115
-0.397517
-0.412314
-0.536743
-0.614561
-0.561541
-0.068716
-0.528263
-0.386583
-0.367502
-0.578441
-0.448746
-0.463928
-0.370824
-0.561682
-0.524732
-0.309717
-0.509479
-0.533052
-0.314219
-0.370115
-0.554325
-0.475212
-0.442313
-0.486416
-0.483771
-0.534966
-0.382599
-0.550948
-0.5768
-0.505653
-0.467715
-0.366557
-0.397113
-0.428989
-0.50879
-0.39153
-0.484527
-0.371367
-0.467628
-0.279183
-0.445977
-0.597755
-0.523426
-0.570929
-0.562943
-0.523201
-0.38739
-0.448397
-0.505793
-0.389041
-0.392514
-0.568579
-0.382593
-0.484588
-0.370455
-0.517264
-0.533441
-0.561316
-0.515065
-0.540111
-0.520654
-0.389094
-0.459948
-0.464463
-0.524381
-0.475111
-0.388636
-0.389812
-0.482307
-0.482683
-0.481398
-0.44983
-0.368025
-0.609279
-0.448599
-0.433377
-0.180386
-0.477158
-0.463797
-0.449189
-0.610778
-0.467588
-0.474165
-0.382674
-0.49018
-0.370606
-0.5654
-0.524557
-0.465466
0.252256
-0.466743
-0.389863
-0.53132
-0.535571
-0.477295
-0.309065
-0.533111
-0.523906
-0.526446
-0.465422
-0.55134
-0.448073
-0.388656
-0.365225
-0.393491
-0.557743
-0.309418
-0.532386
-0.527883
-0.561023
-0.467024
-0.532184
-0.467985
-0.44369
-0.554367
-0.369969
-0.553843
-0.466921
-0.370737
-0.552764
-0.409203
-0.524467
-0.463755
-0.368209
-0.459082
-0.466558
-0.596741
-0.473854
-0.602795
-0.0980025
-0.193607
-0.526062
-0.465554
-0.323886
-0.44734
-0.471089
-0.369971
-0.393928
-0.483009
-0.451064
-0.47644
-0.485665
-0.370429
-0.518656
-0.388912
-0.157467
-0.584971
-0.525149
-0.459272
-0.371311
-0.0647512
-0.483497
-0.566553
-0.367664
-0.38928
-0.52454
-0.451968
-0.57383
-0.418583
-0.448182
-0.455879
-0.612975
-0.36918
-0.510943
-0.387152
-0.458667
-0.389014
-0.476866
-0.446328
-0.388406
-0.522749
-0.313916
-0.475368
-0.590608
-0.562111
-0.507141
-0.465385
-0.636358
-0.45028
-0.482424
-0.588268
-0.44468
-0.53913
-0.465478
-0.542889
-0.525153
-0.483285
-0.481363
-0.512529
-0.309401
-0.390282
-0.450184
-0.387937
-0.475516
-0.397378
-0.450188
-0.534857
-0.388094
-0.52247
-0.537272
-0.549804
-0.387732
-0.535556
-0.459546
-0.309127
-0.47494
-0.554191
-0.425095
-0.371094
-0.625017
-0.511364
-0.206277
-0.548173
-0.464631
-0.447193
-0.447277
0.224589
-0.471606
-0.448003
-0.560138
-0.541333
-0.395948
-0.465284
-0.527275
-0.447724
-0.468457
-0.313452
-0.40336
-0.619946
-0.52926
-0.476449
-0.481752
-0.389257
-0.53222
-0.391781
-0.450283
-0.394451
-0.476135
-0.313964
-0.396951
-0.596146
-0.366265
-0.417762
-0.345003
-0.446061
-0.395679
-0.353428
-0.38942
-0.317958
-0.369115
-0.607833
-0.547953
-0.314735
-0.389804
-0.395462
-0.508832
-0.366004
-0.446858
-0.446765
-0.369392
-0.525758
-0.392689
-0.24696
-0.475322
-0.46242
-0.476325
-0.558109
-0.477644
-0.396291
-0.238723
-0.468684
-0.448939
-0.4334
-0.564542
-0.56306
-0.397745
-0.459244
-0.365691
-0.397416
-0.537972
-0.395358
-0.595781
-0.509332
-0.3144
0.219136
0.0875932
-0.497933
-0.549843
-0.537646
-0.393078
-0.449775
-0.397311
-0.31367
-0.480166
-0.370256
-0.551064
-0.549312
-0.470974
-0.530347
-0.601714
-0.48316
-0.314716
-0.393626
-0.52358
-0.460218
-0.368084
-0.243848
-0.381663
-0.560549
-0.387564
-0.381141
-0.493796
-0.382866
-0.205534
-0.466367
-0.552457
-0.475664
0.0248781
-0.389166
-0.481019
-0.483874
-0.624072
-0.365883
-0.472304
-0.449954
-0.45003
-0.381229
-0.389687
-0.365605
-0.504802
-0.369721
-0.534312
-0.532127
-0.583534
-0.582074
-0.522542
-0.559984
-0.370222
-0.381853
-0.532156
-0.447446
-0.475168
-0.359131
-0.448524
-0.558477
-0.39389
-0.596578
-0.444305
-0.395184
-0.542947
-0.565387
-0.450876
-0.552292
-0.623193
-0.370927
-0.389263
-0.47692
-0.475937
-0.451019
0.083512
-0.655614
-0.157337
-0.525423
-0.370138
-0.314493
-0.465817
-0.399491
-0.369527
-0.542377
-0.369686
-0.444105
-0.53237
-0.467302
-0.579349
-0.482851
-0.524469
-0.465959
-0.367944
-0.369901
-0.229578
-0.522008
-0.369862
-0.459495
-0.475398
-0.459737
-0.387753
-0.390044
-0.519029
-0.561735
-0.576584
-0.452277
-0.365684
-0.505417
-0.420772
-0.548404
-0.535784
-0.460114
-0.47478
-0.464682
-0.534234
-0.459122
-0.45771
-0.459475
-0.340448
-0.501958
-0.535965
-0.527452
-0.529053
-0.426024
-0.370201
-0.476643
-0.496768
-0.443693
-0.44952
-0.368286
-0.466913
-0.612317
-0.548439
-0.365633
-0.394859
-0.324705
-0.528855
-0.388176
-0.524933
-0.534047
-0.392776
-0.466736
-0.460068
-0.482109
-0.425232
-0.389158
-0.175959
-0.56085
-0.386977
-0.547195
-0.388358
-0.365924
-0.381873
-0.388944
-0.366426
-0.45983
-0.556675
-0.531115
-0.304521
-0.397449
-0.389474
-0.395894
-0.397789
-0.457993
-0.390424
-0.467879
-0.44538
-0.532247
-0.523677
0.0188004
-0.385938
-0.494336
-0.389182
-0.519471
-0.526204
-0.371008
-0.600019
-0.397487
-0.392241
-0.565026
-0.462443
-0.546895
-0.447501
-0.461102
-0.403049
-0.532295
-0.598798
-0.18612
-0.397796
-0.369703
-0.458986
-0.552788
-0.398466
-0.610729
-0.599832
-0.369126
-0.389453
-0.449831
-0.446651
-0.388205
-0.464734
-0.314816
-0.465903
-0.395047
-0.586874
-0.446396
-0.394011
-0.539794
-0.523892
-0.535195
-0.465288
-0.451244
-0.532435
-0.531826
-0.370554
-0.395726
-0.440067
-0.458402
0.328562
-0.526585
-0.478653
0.174637
-0.464341
-0.532298
-0.533268
-0.459274
-0.475295
-0.535507
-0.382671
-0.442899
-0.557394
-0.562208
-0.382057
-0.308421
-0.594919
-0.36686
-0.468098
-0.47847
-0.370623
-0.370824
-0.534619
-0.390296
-0.382822
-0.524969
-0.349989
-0.460278
-0.115679
-0.47339
-0.335228
-0.398406
-0.52902
-0.532927
-0.542317
0.216887
-0.528401
-0.474963
-0.484342
-0.370218
-0.396958
-0.366093
-0.329434
-0.397331
-0.389612
-0.572904
-0.459513
-0.391759
-0.476019
-0.467659
-0.313748
-0.392641
-0.369956
-0.536786
-0.153198
-0.392447
-0.539946
-0.532986
-0.390057
-0.460746
-0.524988
-0.526826
-0.37035
-0.481994
-0.370556
-0.387683
-0.395045
-0.409942
-0.502458
-0.48406
-0.480889
-0.56606
-0.509946
0.0732724
-0.561716
-0.522483
-0.444998
-0.534646
-0.505416
-0.398038
-0.563251
-0.447389
-0.382785
-0.340865
-0.450698
-0.395602
-0.365975
-0.356216
-0.510345
-0.498864
-0.468991
-0.468403
-0.585501
-0.482152
-0.515884
-0.473669
-0.638004
-0.538424
-0.309067
-0.56127
-0.377548
-0.557063
-0.383023
-0.47351
-0.577463
-0.449802
-0.397734
-0.36606
-0.474372
-0.313825
-0.531917
-0.584287
-0.540566
-0.370174
-0.399399
-0.459461
-0.365685
-0.393485
-0.314812
-0.582927
-0.578133
-0.599118
-0.526648
-0.531475
-0.425516
-0.347818
-0.391941
-0.314274
-0.33146
-0.610482
-0.533764
-0.559374
-0.496073
-0.466436
-0.522903
-0.528313
-0.558417
-0.389667
-0.532815
-0.369194
-0.39007
-0.464205
-0.483287
-0.528774
-0.555558
-0.395112
-0.388048
-0.449554
-0.603276
-0.388833
-0.532108
-0.247421
-0.366104
-0.367721
-0.313618
-0.371037
-0.426125
-0.39485
-0.53253
-0.584351
-0.425479
-0.550331
-0.369553
-0.575997
-0.369486
-0.663645
-0.266287
-0.470211
-0.503102
-0.460333
0.156983
-0.365963
-0.313454
-0.602776
-0.467281
-0.392335
-0.473442
-0.370382
-0.59652
-0.382571
-0.465697
-0.393462
-0.478001
-0.556558
-0.46703
-0.389606
-0.309907
-0.381361
-0.3895
-0.367579
-0.51072
-0.370581
-0.565188
-0.597733
-0.368525
-0.414071
-0.596832
-0.47562
-0.388409
-0.460888
-0.369301
-0.531776
-0.458649
-0.369547
-0.554131
-0.588868
-0.457989
-0.476158
-0.400601
0.119273
-0.303871
-0.381428
-0.525378
-0.381787
-0.475839
-0.481965
-0.539231
-0.415605
-0.370856
-0.536503
-0.370721
-0.451384
-0.369779
-0.374898
-0.459656
-0.447532
-0.209425
-0.556137
-0.385989
-0.598705
-0.31452
-0.504799
-0.524191
-0.446861
-0.44571
-0.313826
-0.38823
-0.442838
-0.507103
-0.365558
-0.308875
-0.394849
-0.423658
-0.530728
-0.368124
-0.370386
-0.564529
-0.394108
-0.465464
-0.573619
-0.382703
-0.382679
-0.354186
-0.394028
-0.530299
-0.515982
-0.487876
-0.47618
-0.528028
-0.483035
-0.489916
-0.533075
-0.465894
-0.389433
-0.448338
-0.523575
-0.512922
-0.46602
-0.421
-0.390593
-0.567099
-0.609991
-0.561707
-0.604467
-0.506977
-0.365665
-0.449074
-0.466119
-0.559914
-0.524335
-0.367608
-0.387738
-0.532127
-0.49005
-0.550642
-0.308746
-0.531967
-0.366631
-0.398302
-0.46551
-0.465668
-0.532475
-0.483047
-0.388905
-0.44652
-0.446636
-0.548048
-0.276111
-0.47374
-0.464718
-0.557999
-0.465693
-0.562217
-0.563248
-0.463146
-0.308462
-0.419382
-0.313685
-0.448761
-0.447984
-0.388855
-0.36592
-0.382622
-0.369387
-0.559997
-0.47709
-0.384222
-0.397023
-0.612721
-0.474267
-0.466849

## Sheet: d160
cbc
-0.534552
-0.203646
-0.211492
-0.483583
-0.470086
-0.209724
-0.309792
-0.200065
-0.19855
-0.288005
-0.295887
-0.460476
-0.286127
-0.482147
-0.30926
-0.312697
-0.526632
-0.288659
-0.29485
-0.200548
-0.447166
-0.303481
-0.359301
-0.209772
-0.457923
-0.450188
-0.211443
-0.382588
-0.395486
-0.285989
-0.475153
-0.347461
-0.196903
-0.450309
-0.287789
-0.310025
-0.52136
-0.465435
-0.289985
-0.465661
-0.466163
-0.303321
-0.349072
-0.464551
-0.289797
-0.396814
-0.308838
-0.483905
-0.232303
-0.348371
-0.444978
-0.464672
-0.371043
-0.295059
-0.535639
-0.315359
-0.432332
-0.491057
-0.488769
-0.20414
-0.371413
-0.393943
-0.474679
-0.107715
-0.315594
-0.20568
-0.457914
-0.294089
-0.205634
-0.369902
-0.457066
-0.365911
-0.502538
-0.209987
-0.206404
-0.370084
-0.445408
-0.397215
-0.440929
-0.467901
-0.199407
-0.0588607
-0.313043
-0.297091
-0.45791
-0.37997
-0.446024
-0.451334
-0.473978
-0.198942
-0.446743
-0.416904
-0.367752
-0.389746
-0.286359
-0.463898
-0.204922
-0.44783
-0.298852
-0.31493
-0.457076
-0.449941
-0.286206
-0.446763
-0.388192
-0.369194
-0.209197
-0.209032
-0.285737
-0.369206
-0.209491
-0.381669
-0.480751
-0.204639
-0.388534
-0.288945
-0.527718
-0.296136
-0.503382
-0.39773
-0.381074
-0.379958
-0.308605
-0.307684
-0.199997
-0.205376
-0.397734
-0.424367
-0.204097
-0.389252
-0.309644
-0.23984
-0.286794
-0.465119
-0.47526
-0.314641
-0.388828
-0.440924
-0.416128
-0.29504
0.0559586
-0.381435
-0.312464
-0.305845
-0.3946
-0.369101
-0.458458
-0.294982
-0.205533
-0.50177
-0.307247
-0.299367
-0.199443
-0.300058
-0.291006
-0.446415
-0.398302
-0.199427
-0.209456
-0.569117
-0.198811
-0.38166
-0.294485
-0.389742
-0.376961
-0.38137
-0.196724
-0.205772
-0.474762
-0.192094
-0.476229
-0.291653
-0.464302
-0.377507
-0.380078
-0.199368
-0.205704
-0.303871
-0.438461
-0.446616
-0.180657
-0.203638
-0.394561
-0.378401
-0.199205
-0.394475
-0.369236
-0.466565
-0.393009
-0.370363
-0.204425
-0.211056
-0.368059
-0.466786
-0.4821
-0.531815
-0.394906
-0.446315
-0.399098
-0.455994
-0.467405
-0.210989
-0.429648
-0.209386
-0.208106
-0.235625
-0.475193
-0.383062
-0.39249
-0.314638
-0.488359
-0.458184
-0.209345
-0.381952
-0.312435
-0.299178
-0.3692
-0.200434
-0.458901
-0.464006
-0.397811
-0.421445
-0.292569
-0.371404
-0.448396
-0.389043
-0.200207
-0.205663
-0.396177
-0.37008
-0.396831
-0.393386
-0.482389
-0.393383
-0.28978
-0.295015
-0.204754
-0.368715
-0.280014
-0.121829
-0.380757
-0.465911
-0.532099
-0.0591194
-0.404278
-0.310271
-0.394198
-0.18241
-0.482456
-0.396502
-0.290566
-0.19935
-0.36563
-0.183902
-0.200744
-0.385198
-0.314779
-0.382362
-0.465733
-0.288973
-0.397009
-0.470782
-0.369337
-0.481659
-0.402045
-0.49359
-0.284968
-0.262802
-0.294737
-0.45231
-0.531869
-0.313115
-0.446412
-0.29893
-0.448935
-0.457652
-0.391105
-0.300166
-0.450786
-0.394394
-0.389558
-0.388929
-0.451469
-0.196817
-0.295132
-0.523305
-0.399962
-0.286675
-0.447278
-0.209728
-0.297299
-0.204568
-0.464689
-0.524134
-0.395972
-0.289625
-0.291102
-0.481622
-0.440976
-0.200735
-0.381606
-0.209129
-0.398067
-0.307782
-0.310298
-0.303822
-0.379032
-0.303113
-0.430224
-0.285669
-0.466095
-0.382656
-0.272655
-0.476103
-0.288599
-0.303058
-0.209617
-0.297547
-0.380893
-0.303379
-0.299151
-0.464603
-0.522958
-0.289337
-0.294945
-0.302984
-0.205493
-0.443207
-0.209853
-0.397849
-0.31398
-0.333364
-0.389116
-0.534606
-0.469099
-0.424144
-0.209511
-0.369511
-0.285254
-0.393065
-0.475064
-0.480899
-0.391126
0.161461
-0.209577
-0.21515
-0.199036
-0.295957
-0.38826
-0.465491
-0.467581
-0.536386
-0.293463
-0.367576
-0.389234
-0.379322
-0.285353
-0.382944
-0.47496
-0.129699
-0.463044
-0.451394
-0.439891
-0.407416
-0.199252
-0.204275
-0.368171
-0.199016
-0.199442
-0.480664
-0.314286
-0.29767
-0.1995
-0.445151
-0.45695
-0.208529
-0.289457
-0.199613
-0.526144
-0.294768
-0.398672
-0.285995
-0.466417
-0.432707
-0.453059
-0.367934
-0.365437
-0.204217
-0.290115
-0.381657
-0.388198
-0.196416
-0.448007
-0.388412
-0.385074
-0.382359
-0.47555
-0.290375
-0.481568
-0.388893
-0.381693
-0.205358
-0.480874
-0.313208
-0.199982
-0.39754
-0.320279
-0.474633
-0.446365
-0.205926
-0.295792
-0.299966
-0.456568
-0.380392
-0.366731
-0.203974
-0.314721
-0.304313
-0.286261
-0.295509
-0.183787
-0.389313
-0.199739
-0.204034
-0.290504
-0.205903
-0.387764
-0.314805
-0.423024
-0.312987
-0.288809
-0.199732
-0.28858
-0.394579
-0.488024
-0.393386
-0.196963
-0.204306
-0.39725
-0.464177
-0.198851
-0.39595
-0.434616
-0.286554
-0.209524
-0.285939
-0.32708
-0.285868
-0.370654
-0.209651
-0.365915
-0.314688
-0.29984
-0.447079
-0.209828
-0.369894
-0.513676
-0.312543
-0.466904
-0.367596
-0.367929
-0.205956
-0.476415
-0.390205
-0.203909
-0.303522
0.0507429
-0.521274
-0.0588969
-0.200667
-0.309862
-0.304783
-0.381408
-0.380165
-0.422638
-0.294734
-0.371762
-0.286754
-0.45043
-0.199998
-0.447342
-0.383054
-0.44945
-0.286502
-0.313714
-0.439161
-0.366004
-0.203836
-0.447244
-0.312306
-0.286908
-0.445143
-0.398868
-0.0335059
-0.395124
-0.308024
-0.294945
-0.206431
-0.472761
-0.286209
-0.299186
-0.312488
-0.487026
-0.199746
-0.45122
-0.209333
-0.310883
-0.20987
-0.210121
-0.448579
-0.442444
-0.198604
-0.365451
-0.359783
-0.397924
-0.44605
-0.396462
-0.304214
-0.388139
-0.286218
-0.294766
-0.199829
-0.305345
-0.308557
-0.309549
-0.479143
-0.381006
-0.357173
-0.103258
-0.291235
-0.389043
-0.396495
-0.295147
-0.21155
-0.469412
-0.213282
-0.381526
-0.389354
-0.289513
-0.395912
-0.288733
-0.288838
-0.205611
-0.520117
-0.304042
-0.208916
-0.341395
-0.389939
-0.19907
-0.296554
-0.378918
-0.313461
-0.211257
-0.368672
-0.204357
-0.46451
-0.290356
-0.361294
-0.483674
-0.440234
-0.205985
-0.379318
-0.41715
-0.379407
-0.208431
-0.294988
-0.367206
-0.46919
-0.302465
-0.309457
-0.440148
-0.487159
-0.447598
-0.397659
-0.31371
-0.221656
-0.476059
-0.204583
-0.388023
-0.443723
-0.0263142
-0.366638
-0.292731
-0.439512
-0.312058
-0.448433
-0.200559
-0.45118
-0.210971
-0.304267
-0.465095
-0.435081
-0.2909
-0.395453
-0.392937
-0.445645
-0.408349
-0.39688
-0.38082
-0.369498
-0.384262
-0.394915
-0.51922
-0.529561
-0.388387
-0.205603
-0.381594
-0.300136
-0.381953
-0.20539
-0.28964
-0.528491
-0.398252
-0.315121
-0.308498
-0.38218
-0.465641
-0.308607
-0.525202
-0.32261
-0.199372
-0.420606
-0.203335
-0.468795
-0.00783475
-0.295277
-0.295187
-0.297406
-0.28663
-0.48367
-0.395828
-0.389214
-0.299144
-0.474611
-0.28634
-0.38044
-0.199672
-0.370892
-0.370139
-0.294798
-0.314562
-0.366743
-0.299317
-0.308283
-0.458744
-0.285798
-0.465767
-0.468741
-0.448186
-0.481829
-0.445199
-0.387069
-0.463842
-0.416981
-0.199942
-0.300292
-0.209566
-0.389905
-0.390867
-0.450985
-0.287535
-0.199169
-0.196887
-0.286939
-0.289021
-0.31427
-0.297239
-0.460086
-0.436251
-0.295727
-0.367788
-0.396307
0.144732
-0.394085
-0.466777
-0.396662
-0.467895
-0.314543
-0.359505
-0.385937
-0.388802
-0.369585
-0.294602
-0.45841
-0.397592
-0.203779
-0.415726
-0.211221
-0.204485
-0.465636
-0.306072
-0.306602
-0.299768
-0.448056
-0.31443
-0.382341
-0.458355
-0.388873
-0.209668
-0.371291
-0.488259
-0.388444
-0.128881
-0.180685
-0.521082
-0.41326
-0.387712
-0.367545
-0.388574
-0.38841
-0.199324
-0.465229
-0.200628
-0.452827
-0.370014
-0.393595
-0.196845
-0.287218
-0.476496
-0.468107
-0.203468
-0.395729
-0.46759
-0.475185
-0.303246
-0.392907
-0.389181
-0.288099
-0.528895
-0.393244
-0.462877
-0.289783
-0.519978
-0.197044
-0.204082
-0.441082
-0.489721
-0.287834
-0.314484
-0.209385
-0.211096
-0.407877
-0.398321
-0.482171
-0.208191
-0.312411
-0.211128
-0.467755
-0.501679
-0.380664
-0.199211
-0.19689
-0.466042
-0.289001
-0.47008
-0.524879
-0.296245
-0.392092
-0.472173
-0.48228
-0.199955
-0.315558
-0.493475
-0.436894
-0.389638
-0.528045
-0.331126
-0.209772
-0.308978
-0.196711
-0.295878
-0.396761
-0.413663
-0.209616
-0.294909
-0.204094
-0.446373
-0.309093
-0.277259
-0.295548
-0.459224
-0.312629
-0.505378
-0.277425
-0.295543
-0.314414
-0.369058
-0.30813
-0.204431
-0.492435
-0.286535
-0.294218
-0.314345
-0.393347
-0.443989
-0.210603
-0.285655
-0.204635
-0.526601
-0.288606
-0.394113
-0.365861
-0.448808
-0.0743338
-0.465329
-0.205842
-0.416458
-0.477585
-0.289555
-0.388656
-0.461849
-0.380961
-0.205596
-0.30368
-0.196553
-0.380473
-0.365265
-0.380205
-0.288512
-0.30067
-0.280784
-0.334875
-0.366544
-0.295767
-0.372293
-0.458776
-0.340878
-0.205184
-0.446435
-0.204196
-0.20628
-0.449558
-0.286236
-0.448377
-0.313592
-0.383606
-0.287473
-0.383232
-0.471546
-0.393708
-0.399228
-0.448006
-0.286628
-0.532237
-0.200076
-0.304303
-0.389548
-0.53111
-0.447561
-0.209938
-0.395758
-0.203773
-0.397102
-0.289183
-0.205526
-0.29147
-0.457456
-0.348496
-0.204997
-0.199206
-0.209611
-0.208048
-0.00736045
-0.380301
-0.203892
-0.393162
-0.483241
-0.305361
-0.287168
-0.310742
-0.398655
-0.449238
-0.299753
-0.468026
-0.483081
-0.294805
-0.204795
-0.448231
-0.446356
-0.314711
-0.313335
-0.394512
-0.517782
-0.302972
-0.205648
-0.381861
-0.321297
-0.295154
-0.450924
-0.308885
-0.366029
-0.395108
-0.320275
-0.290037
-0.199205
-0.365487
-0.204287
-0.289281
-0.199965
-0.381256
