# Supplementary material for: Full assembly of HIV-1 particles requires assistance of the membrane curvature factor IRSp53
Source: eLife. 2021 Jun 11;10:e67321. doi: 10.7554/eLife.67321 (PMC8260224; doi:10.7554/eLife.67321)
Supplement: Figure 4—source data 2. [file elife-67321-fig4-data2.xlsx]

## Sheet: d0
cbc
0.977727
0.962624
0.85343
0.837118
0.892985
0.998981
0.999691
0.999061
0.999309
0.923382
0.044984
0.9997
0.890143
0.962639
0.655282
0.998869
0.912264
0.962665
0.791669
0.998988
0.879723
0.843772
0.987145
0.996817
0.93791
0.926561
0.998526
0.925643
0.996597
0.985316
0.679105
0.24195
0.781734
0.998921
0.949116
0.605594
0.858229
0.738862
0.996822
0.41643
0.984891
0.874495
0.927526
0.235717
0.94789
0.739906
0.997881
0.834083
0.978859
0.374686
0.987375
0.999811
0.998955
0.914913
-0.178762
0.369331
0.801281
0.800364
0.740674
0.837525
0.998802
0.911687
0.999049
0.984577
0.984196
0.985863
0.568517
0.0606245
0.928869
0.938737
0.907271
0.998742
0.979619
0.984439
0.999395
0.802009
0.998943
0.999585
0.999385
0.893652
0.997089
0.995817
0.999813
0.914743
0.340742
0.889579
0.995851
0.998256
0.938726
0.99879
0.848752
0.981422
0.689533
0.858758
0.919992
0.639898
0.999516
0.914902
0.683317
0.882134
0.998349
0.360197
0.961911
0.913704
0.99967
0.997384
0.998007
0.999431
0.667152
0.839307
0.948903
0.890762
0.962129
0.994823
0.357325
0.998254
0.998894
0.688343
0.957991
0.0561573
0.745176
0.923679
0.801546
0.926167
0.998047
0.894573
0.689078
0.999654
0.864873
0.134701
0.997855
0.962092
0.910636
0.348801
0.993378
0.791892
0.912632
0.622599
0.800858
0.995557
0.904997
0.996731
0.985548
0.996273
0.3932
0.980669
0.578333
0.596046
0.374763
0.996715
0.998592
0.849022
0.853226
0.998806
0.962529
0.912854
0.29972
0.679112
0.999421
0.868166
0.95002
0.962499
0.753199
0.986158
0.352702
0.99616
0.917097
0.996464
0.925571
0.919732
0.962278
0.824972
0.425092
0.999548
0.800352
0.962358
0.739744
0.998452
0.5681
0.957734
0.959481
0.863998
0.631607
0.99914
0.658639
0.998857
-0.106555
0.999933
0.997391
0.998344
0.497502
0.999134
0.987957
0.91954
0.74034
0.524083
0.998635
0.929914
0.804811
0.39528
0.925144
0.919948
0.167847
0.44981
0.99613
0.960537
0.8973
0.997223
0.927006
0.999923
0.997042
0.805888
0.992279
0.984966
0.948571
0.999811
0.983677
0.847271
0.202493
0.984913
0.686697
0.244556
0.999632
0.349255
0.999041
0.688238
0.427162
0.874943
0.987194
0.710785
0.918987
0.381343
0.999121
0.998367
0.723296
0.961056
0.688428
0.995103
0.577053
0.785787
0.997978
0.768767
0.927749
0.997156
0.421467
0.268842
0.811679
0.98692
0.983403
0.962315
0.912016
0.999011
0.881735
0.983919
0.926072
0.9263
0.903976
0.999158
0.792621
0.996005
0.84636
0.804396
0.864401
0.857702
0.994793
0.999472
0.849529
0.914285
0.962994
0.898287
0.997073
0.224268
0.87826
0.918836
0.999156
0.998932
0.923538
0.924439
0.996472
0.986649
0.999868
0.998694
0.74413
0.998383
0
0.960121
0.999443
0.997852
0.857033
0.676899
0.999786
0.915002
0.999978
0.998582
0.902726
0.746878
0.998402
0.949485
0.983208
0.998454
0.923469
0.914206
0.986754
0.99957
0.449824
0.999071
0.913437
0.790636
0.752183
0.865671
0.999668
0.997742
0.84803
0.92664
0.986168
0.962229
0.999158
0.98653
0.932209
0.926647
0.984465
0.359718
0.999646
0.998689
0.880421
0.700925
0.846197
0.757151
0.484383
0.996386
0.841709
0.99849
0.406771
0.98392
0.276516
0.688135
0.0917323
0.987021
0.998946
0.428069
0.961421
0.456405
0.673174
0.998865
0.890942
0.880446
0.945648
0.890665
0.985862
0.700684
0.910566
0.946888
0.553249
0.827141
0.998006
0.137575
0.706055
0.406514
0.88098
0.920782
0.999575
0.961952
0.655336
0.925729
0.995055
0.859776
0.910696
0.71557
0.997622
0.816154
0.864069
0.623613
0.803027
0.998149
0.999405
0.998529
0.996913
0.924609
0.22411
0.815092
0.984191
0.344355
0.866387
0.891026
0.998181
0.975509
0.703059
0.997918
0.996183
0.880169
0.994633
0.250808
0.916162
0.891879
0.998645
0.996682
0.977279
0.754427
0.211044
0.801963
0.823954
0.610515
0.622903
0.915421
0.936584
0.823808
0.983941
0.915525
0.663668
0.74512
0.91304
0.775157
0.998878
0.999459
0.875723
0.981698
0.994433
0.913684
0.998609
0.404397
0.741387
0.996902
0.997179
0.913261
0.631526
0.89278
0.753249
0.761747
0.900252
0.922227
0.406521
0.922991
0.656733
0.922759
0.583619
0.745482
0.998858
0.998988
0.913423
0.996718
0.930774
0.971537
0.550218
0.348079
0.99779
0.987345
0.986955
0.788887
0.996692
0.961739
0.690513
0.785485
0.996755
0.999828
0.930407
0.999045
0.427199
0.985558
0.959089
0.434375
0.815505
0.056136
0.494384
0.858813
0.800488
0.740234
0.985058
0.812363
0.925014
0.997795
0.998156
0.849372
0.999017
0.107387
0.995875
0.727362
0.983628
0.999191
0.786267
0.999619
0.225217
0.755127
0.986898
0.914387
0.916252
0.745592
0.914446
-0.00567508
0.935353
0.241779
0.999128
0.999672
0.985041
0.357848
0.933262
0.891136
0.846755
0.65663
0.877398
0.751884
0.962091
0.986942
0.963441
0.472006
0.683756
0.836186
0.623239
0.997876
0.986452
0.961504
0.815465
0.937339
0.93358
0.926237
0.998071
0.911486
0.656926
0.754753
0.619034
0.145556
0.997819
0.996254
0.60634
0.94615
0.997983
0.705292
0.789469
0.392501
0.924149
0.407593
0.998892
0.84699
0.81271
0.348488
0.865735
0.999319
0.963099
0.315229
0.954087
0.982829
0.999183
0.819404
0.983703
0.916943
0.325616
0.999057
0.986513
0.0846591
0.995742
0.690192
0.30941
0.728149
0.504728
0.995309
0.984298
0.200743
0.976335
0.91519
0.719438
0.999697
0.987103
0.923606
0.886295
0.382359
0.435332
0.949608
0.911515
0.791018
0.987069
0.893575
0.760924
0.645288
0.98487
0.407344
0.915185
0.457639
0.983488
0.68847
0.868423
0.859669
0.360683
0.0959546
0.824982
0.888126
0.999239
0.985929
0.986391
0.687949
0.998232
0.863882
0.996906
0.825252
0.909266
0.86293
0.678341
0.742341
0.986155
0.885757
0.924357
0.995445
0.925126
0.928663
0.949396
0.84477
0.998906
0.876421
0.643095
0.999079
0.996939
0.946994
0.415521
0.299508
0.778271
0.997961
0.779334
0.465872
0.400548
0.620185
0.999359
0.946726
0.996899
0.139712
0.926458
0.984318
0.427059
0.998938
0.755598
0.676824
0.767913
0.999079
0.996148
0.999257
0.998347
0.25866
0.879938
0.680331
0.462751
0.634779
0.745031
0.782678
0.672277
0.999318
0.709246
0.923995
0.999402
0.321703
0.863357
0.999293
0.915608
0.998867
0.558014
0.976706
0.242036
0.532589
0.964853
0.998912
0.88987
0.999105
0.999008
0.938929
0.998885
0.73275
0.974409
0.999533
0.914388
0.83956
-0.17883
0.168578
0.961781
0.986262
0.657694
0.996419
0.426946
0.9828
0.755629
0.790319
0.461984
0.996903
0.999749
0.297323
0.99885
0.829081
0.997165
0.999047
0.891698
0.998843
0.817048
0.86509
0.925664
0.999732
0.154388
0.473694
0.999032
0.914164
0.998207
0.998464
0.213366
0.985401
0.985667
0.93013
0.962563
0.998576
0.605158
0.998863
0.997881
0.996673
0.997993
0.962345
0.914848
0.260577
0.999751
0.857439
0.998579
0.895837
0.996663
0.998949
0.774569
0.815559
0.938221
0.998081
0.584735
0.986694
0.999497
0.347242
0.975601
0.998744
0.691264
0.958322
0.999698
0.998886
0.999355
0.996405
0.703134
0.999512
0.999699
0.391406
0.638507
0.472445
0.500997
0.421548
0.901987
0.987358
0.600676
0.999306
0.91327
0.903673
0.912813
0.997634
0.574528
0.775106
0.860101
0.998675
0.985515
0.95737
0.30334
0.999882
0.781548
0.77799
0.847728
0.999232
0.999412
0.998399
0.407894
0.705879
0.808449
0.948655
0.999082
0.802535
0.764617
0.984658
0.753923
0.960592
-0.106441
0.998323
0.811444
0.986597
0.563444
0.87567
0.705197
0.16894
0.999021
0.324952
0.999058
0.985769
0.99823
0.688678
0.406904
0.999395
0.244518
0.986083
0.799271
0.99536
0.422111
0.999223
0.995191
0.998875
0.654554
0.834565
0.919735
0.406753
0.998948
0.995076
0.948877
0.846784
0.986423
0.998776
0.998398
0.926165
0.99374
0.999127
0.510059
0.912133
0.536789
0.995387
0.996986
0.999138
0.621399
0.699715
0.999841
0.95978
0.858705
0.894051
0.913926
0.711473
0.999527
0.99932
0.998316
0.954225
0.388664
0.779874
0.985552
0.995993
0.788296
0.0120807
0.891641
0.99943
0.997637
0.903803
0.999234
0.394495
0.986091
0.987076
0.99395
0.677
0.978104
0.404426
0.985668
0.746627
0.998764
0.996918
0.913215
0.987099
0.994302
0.913089
0.81326
0.996881
0.998235
0.656547
0.997515
0.706309
0.999307
0.975327
0.235613
0.996219
0.999287
0.997276
0.69052
0.497978
0.999459
0.950146
0.999334
0.815921
0.718993
0.996699
0.998592
0.938812
0.799594
0.999919
0.392298
0.890901
0.847153
0.80776
0.985204
0.981257
0.996606
0.962441
0.997241
0.838793
0.998102
0.268615
0.446088
0.999616
0.962809
0.878968
0.680128
0.902715
0.999521
0.892269
0.929399
0.998413

## Sheet: d20
cbc
0.0864883
0.885236
0.911487
0.961521
0.553898
0.999569
0.878925
0.998051
0.998086
0.779886
0.998517
0.996915
0.985983
0.767883
0.997873
0.441017
0.999234
0.335385
0.0556785
0.859615
0.354664
0.999022
0.369133
0.95936
0.229145
0.960911
0.86327
0.887262
0.889642
0.994674
0.919289
0.998396
0.752866
0.933531
0.999821
0.878971
0.507344
0.0271539
0.996274
0.09599
0.91477
0.924825
0.983619
0.858137
0.615433
0.619698
0.0162788
0.924672
0.230356
0.995572
0.534557
0.83229
0.866375
0.99968
0.922574
0.995505
0.475936
0.897646
0.868574
0.809515
0.986295
0.983349
0.864196
0.998916
0.995756
0.997363
0.792373
0.231899
0.997167
0.983019
0.959558
0.92863
0.986285
0.861065
0.961473
0.999751
0.452927
0.998583
0.8586
0.997477
0.998653
0.170599
0.890641
0.441796
0.944643
0.39256
0.422832
-0.151771
0.912344
0.994934
0.986111
0.192283
0.67856
0.995611
0.408235
0.999773
0.982506
0.998969
0.999676
-0.0567857
0.999235
0.9966
0.267635
0.16743
0.848696
0.92333
0.608677
0.907913
0.0425483
0.903554
0.995166
0.999247
0.485247
0.75244
0.682637
0.322702
0.999422
0.169903
0.996692
0.951172
0.521787
0.995417
0.452948
0.996644
0.736555
0.995356
0.170524
0.927434
0.716665
0.330837
0.998714
0.441092
0.854546
0.729568
0.997572
0.559408
0.92666
0.993769
0.430018
0.852228
0.917468
-0.21801
0.997913
0.957953
0.996744
0.948289
0.962163
0.301253
0.792043
0.386248
0.280108
0.743036
0.996163
0.341268
0.99596
0.923814
0.987486
0.912963
0.585851
0.31059
0.996488
0.997873
0.757476
0.642285
0.925075
0.516172
0.374097
0.89015
0.890539
0.999243
0.83762
0.633668
0.724572
0.985983
0.13071
0.923819
0.985921
0.369823
0.998554
0.765974
0.99542
0.946776
0.923773
0.912483
0.996333
0.864532
0.62224
0.833471
0.998927
0.996271
0.997805
0.928179
0.393368
0.859733
0.828656
0.922672
0.917936
0.961339
0.839901
0.88123
0.998095
0.938777
0.984969
0.828059
0.922993
0.998731
0.972739
0.572718
0.741432
0.904009
0.987457
0.995908
0.881879
0.925206
0.99863
0.99726
0.228879
0.982516
0.923618
0.81467
0.35353
0.994046
0.60868
0.998679
0.321461
0.398163
0.353476
0.994919
0.911991
0.994166
0.386392
0.999747
0.998545
0.997428
0.857739
0.99925
0.99653
0.94436
0.885146
0.962247
-0.0966188
0.999632
0.998541
0.298096
0.926845
0.647523
0.924113
0.997921
0.422844
0.962631
0.92629
0.927776
0.539649
0.98575
0.649805
0.877581
0.995522
0.4872
0.998587
0.925463
0.976925
0.416871
0.52621
0.996112
0.909576
0.98626
0.722749
0.659574
0.924294
0.509704
0.999179
0.99418
0.509057
0.913634
0.80996
0.9983
0.996029
0.99945
0.924562
0.603019
0.583293
0.984976
0.973893
0.402058
0.997398
0.787939
0.997417
0.91254
0.695598
0.834996
0.891786
-0.165169
0.596352
0.89031
0.891108
0.997914
0.63604
0.840834
0.998351
0.914409
0.945491
0.828841
0.958325
0.982405
0.0761965
0.997953
0.998437
0.399573
0.999577
0.811269
0.98625
0.999096
-0.0414333
0.997568
0.375436
0.339714
0.924932
0.986707
0.550919
0.307333
0.823166
0.88521
0.997041
0.664809
0.341058
0.985786
0.499218
0.996631
0.800429
0.998737
0.928143
0.925431
0.373956
0.0568954
0.659436
0.926793
0.77778
0.840594
0.996019
0.979776
0.960484
0.998492
0.658992
0.999244
0.985908
0.629681
0.796297
0.167176
0.995663
0.143078
0.792303
0.390605
0.984979
0.510889
0.997152
0.596952
0.218182
0.820016
0.54258
0.926013
0.644421
0.655177
0.505147
0.786622
0.396413
0.984516
0.630366
0.841783
0.985933
0.998069
0.677852
0.891689
0.996045
0.994056
0.896896
0.775226
0.733216
0.639628
0.881827
0.995623
0.852344
0.382127
0.253469
0.86566
0.90622
0.99794
0.624685
0.801128
0.911583
0.928309
0.553122
0.844566
0.998859
0.83669
0.99604
0.710553
0.377016
0.246693
-0.037866
0.999428
0.985409
0.981819
0.984468
0.280608
0.819302
0.275258
0.996445
0.993096
0.996529
0.997986
0.961575
0.664617
0.982349
0.998738
0.801605
0.441726
0.621435
0.999041
0.849711
0.890813
0.894176
0.929778
0.485754
0.999535
0.795713
0.986883
0.37216
0.998964
0.998644
0.994204
0.583783
0.997096
0.278915
0.995085
0.504011
-0.233037
0.984513
0.552992
0.995804
0.0982132
0.998861
0.442617
0.960812
0.620777
0.814558
0.997648
0.740164
0.819924
0.996354
0.760813
0.978357
0.893633
0.894217
0.998825
0.810658
0.999021
0.999592
-0.0624027
0.755518
0.757953
0.987075
0.996936
0.912966
0.999248
0.798997
0.832535
0.793205
0.99882
0.398802
0.99361
0.441384
0.790865
0.997599
0.994304
0.840631
0.994742
0.983385
0.284282
0.510955
0.488984
0.00519432
0.794375
0.551702
0.428007
0.833314
0.876651
0.997367
0.583989
0.996605
0.987212
0.879663
0.986119
0.957062
0.399158
0.997939
0.375063
0.933725
0.998725
0.948908
0.998132
0.961354
0.99521
0.656732
0.724924
0.341372
0.998814
0.925108
0.999161
0.81102
0.404464
-0.167784
0.364468
0.442144
0.135692
0.998978
0.0505252
0.926709
0.40844
0.88947
0.6561
0.910769
0.959342
0.961481
0.926103
0.927042
0.671867
0.998191
0.402066
0.995432
0.362645
0.998991
0.597764
0.997937
0.999302
0.646561
0.794149
0.486198
0.243195
0.364884
0.799723
0.77551
0.911614
0.489648
0.98573
0.998349
0.99958
0.864145
0.916603
0.998053
0.508112
0.395612
0.995671
0.976831
0.926181
0.996481
0.243279
0.634591
0.678196
0.382059
0.997193
0.766907
0.923891
0.88875
0.805189
0.997847
0.929709
0.999216
0.362012
0.996665
0.998492
0.590438
0.813189
0.55468
0.997649
0.999592
0.996385
0.960024
0.945637
0.984628
0.674211
0.776317
0.912561
0.962742
0.998606
0.987168
0.972647
0.926441
0.756864
0.924976
0.59088
0.815408
0.996629
0.999624
0.466082
0.0882263
0.275234
0.228751
0.166253
0.67843
0.84632
0.24339
0.857898
0.961082
0.925021
0.814889
0.354412
0.961772
0.4282
0.9815
0.0762015
0.576714
0.927902
0.981835
0.719355
0.925248
0.998186
0.999057
0.998885
0.659969
0.783777
0.998446
0.646108
0.465855
0.997147
0.396552
0.998395
0.387122
0.243555
0.917769
0.958816
0.999105
0.583868
0.995146
0.914963
0.959275
0.985195
0.858588
0.362252
0.874775
0.146013
0.997849
0.891507
0.987705
0.451705
0.995762
0.999417
0.927823
0.999747
0.928023
0.485951
0.947972
0.30534
0.405859
0.998381
0.984245
0.697938
0.996921
0.924172
0.195383
0.499686
0.998655
0.901251
0.369107
0.9945
0.40235
0.766909
0.579906
0.823919
0.998988
0.986998
0.505608
0.272163
0.768025
0.998695
0.998494
0.694644
0.903911
0.998039
0.743011
0.438689
0.654795
0.768175
0.722939
0.996552
0.646189
0.538339
0.997564
0.242001
0.0705498
0.45349
0.891458
0.845382
0.912832
0.342326
-0.244372
0.510604
0.50639
0.460534
0.75326
0.994072
0.959443
0.87886
0.903917
0.994229
0.489294
0.849826
0.997093
0.849911
0.925902
0.543819
0.998905
0.535408
0.984953
0.875233
0.679086
0.999032
0.386951
0.984054
0.985955
0.913195
0.890957
0.744226
0.92789
0.998137
0.74171
0.99921
0.439759
-0.0121394
0.998694
0.914251
0.744912
0.997521
0.974574
0.948492
0.891825
0.722843
0.346671
0.779883
0.961692
0.927969
0.984251
0.167678
0.998791
0.73221
0.985397
0.986747
0.475003
0.573974
0.981085
0.341388
0.997061
0.9988
0.893989
0.99728
0.929398
0.999739
0.784599
0.999265
0.928436
0.999222
0.997969
0.986854
0.857982
0.891414
0.711162
0.536995
0.904116
0.925193
0.664576
0.982865
0.851965
0.0704039
0.961935
0.443463
0.359578
0.695667
0.800433
0.996342
0.985248
0.997983
-0.129153
0.997969
0.372884
0.655046
0.580174
0.81551
0.294579
0.507721
0.91551
0.10778
0.758219
0.243752
0.755551
0.995512
0.924672
0.999948
0.741438
0.99823
0.533001
0.811644
0.98745
0.788987
0.998732
0.998134
0.811477
0.787895
0.64754
0.598757
0.826082
0.373263
0.756881
0.985863
0.950599
0.936998
0.999467
0.99633
0.999817
0.776894
0.911671
0.981343
0.770651
0.996981
0.995342
0.903751
0.221338
0.720845
0.856633
0.442806
0.994268
0.925162
0.998063
0.812887
0.744877
0.808301
0.900737
0.997293
0.998555
0.856698
0.921571
0.997304
0.995887
0.986917
0.863326
-0.0413845
0.957608
0.912959
0.352773
0.825897
0.998999
0.554764
0.813698
0.999434
0.997442
0.995374
0.997858
0.486377
0.999251
0.998852
0.889759
0.730885
0.998357
0.24406
0.998245
0.752321
0.927269
0.720406
0.911888
0.610375
0.791735
0.903367
0.243301
0.77788
0.737101
0.986064
0.900833
0.986271
0.999711
0.998091
0.913954
0.656544
0.577128
0.998342
0.743149
0.984992
0.99721
0.986474
0.996223
0.786541
0.983592
0.633417
0.99946
0.49575
0.99812
0.947036
0.264122
0.927552
0.815152
0.995792
0.999082
0.788337

## Sheet: d40
cbc
0.59864
0.923615
0.994238
0.891671
-0.0594206
0.987061
0.924546
0.984256
0.999514
0.845222
0.999797
0.837558
-0.0980492
0.998712
0.903457
0.961555
0.521109
0.99901
0.986192
0.482758
0.968561
0.906186
0.453357
0.877661
0.112795
0.961603
0.864006
0.847432
0.139753
0.812872
0.857236
0.999691
0.663388
0.846241
0.0784706
0.999062
0.987092
0.823206
0.862327
0.847725
0.996886
0.247434
0.984509
0.63502
0.206956
0.998242
0.740894
0.957213
0.998055
0.253991
0.799802
0.666864
0.925357
0.997754
0.998258
0.879494
0.998882
0.960296
0.976449
0.848408
0.923812
0.864357
0.926189
0.481586
0.912592
0.506411
-0.108563
0.452664
0.962041
0.853893
0.915321
0.999093
0.987353
0.611987
0.925899
-0.1085
0.395214
0.936845
0.913189
0.98646
0.918698
0.744018
0.96172
0.998065
0.924399
0.837346
0.911989
0.564684
0.985933
0.809616
0.90415
0.754941
0.889137
0.891526
0.916323
0.925694
0.674235
0.372221
0.661475
0.92396
0.868008
0.997095
0.893377
0.194773
0.996747
0.923983
0.331606
0.920617
0.765937
0.927246
0.786556
0.821826
0.985941
0.930825
0.211183
0.859542
0.999066
0.883313
0.780303
0.973626
0.574954
0.929065
0.757954
0.997301
0.86585
0.80534
0.206442
0.748662
0.998811
0.702233
0.994843
0.960292
0.974908
0.383903
0.787823
0.995331
0.999285
0.997098
0.984175
0.996389
0.996219
0.774502
0.52109
0.888842
0.998499
0.824075
0.878384
0.804145
0.575003
0.996739
0.292241
0.856761
0.998112
0.801482
0.999427
0.932969
0.808759
0.888618
0.496997
0.962339
0.995132
0.804114
0.830638
0.959802
0.997748
0.813927
0.994191
0.803013
0.856804
0.999086
0.998979
0.98706
0.922757
0.998782
0.998968
0.98587
0.999214
0.442695
0.999412
0.838177
0.700885
0.99857
0.938703
0.678157
0.998765
0.0271105
0.844839
0.912035
0.352456
0.983049
0.801203
0.960248
0.233926
0.916749
0.676591
0.99829
0.987639
0.998471
0.987399
0.754772
0.927557
0.445216
0.812219
0.997827
0.998471
0.564009
0.514678
0.648942
0.858504
0.999606
0.89211
0.985041
0.987034
0.134617
0.362627
0.999154
0.999019
0.998797
0.840315
0.887778
0.576418
0.997567
0.911746
0.756044
0.913053
0.940457
0.998566
0.996436
0.862552
0.574189
0.844815
0.993374
0.777683
0.998927
0.987199
0.858503
0.998875
0.456539
0.958421
0.878582
0.962843
0.999116
0.397427
0.985319
0.999055
0.998746
0.364094
0.998949
-0.146985
0.960969
0.718938
0.913557
0.906589
0.995785
0.995866
0.0168321
0.892755
0.921418
0.846204
0.998003
0.997895
0.998566
0.855702
0.931285
0.892446
0.946244
0.985236
0.985569
0.999159
0.998468
0.891707
0.856508
0.506486
0.846908
0.798233
0.985084
0.962907
0.999311
0.994506
0.521452
0.419414
0.913935
0.853245
0.995464
0.671661
0.9977
0.983207
0.811059
0.364414
0.924606
0.689996
0.689459
0.891129
0.894173
0.961555
0.80273
0.999002
0.986962
0.994734
0.889606
-0.291247
0.645601
0.994237
0.924601
0.799278
0.80295
0.609488
0.699006
0.66647
0.860695
-0.0464075
0.996949
0.440347
0.398138
0.406582
0.999307
0.639503
0.995384
0.914066
0.986049
0.993335
0.984791
0.925448
0.998958
0.995694
0.879575
0.997804
0.894031
0.0809664
0.342181
0.843153
0.35292
0.96224
0.41933
0.999666
0.609059
0.80307
0.876946
0.926669
0.474838
0.998551
0.992202
0.167854
0.903337
0.752894
0.99871
0.701839
0.99724
0.998425
0.255579
0.489871
0.815814
0.985411
0.97272
0.476817
0.98519
0.99628
0.998476
0.99843
0.623115
0.991916
0.733973
0.997747
0.223256
0.812105
0.35247
0.88959
0.888002
0.996269
0.997132
0.999512
0.812984
0.985786
0.925351
0.99949
0.820853
0.855179
0.999188
0.95932
0.841365
0.877239
0.997963
0.999394
0.997789
0.826326
0.232832
0.997007
0.708618
0.813339
0.856951
0.893337
0.985354
0.877441
0.92282
0.605763
0.888367
0.979299
0.999305
0.925981
0.281968
0.986468
0.996709
0.598603
0.556932
-0.0879215
0.923616
0.998864
0.894713
0.00508103
0.962712
0.997391
0.745509
0.904373
0.999288
0.614695
0.484432
0.896387
-0.0543929
0.999331
0.997987
0.304948
0.921489
0.274405
0.639886
0.914906
0.860063
0.962207
0.508825
0.998901
0.960627
0.867294
0.999034
0.998547
0.999088
0.922391
0.994609
0.99912
0.995294
0.95955
0.986668
0.472163
0.998587
0.82356
0.845409
0.889392
0.998457
0.997035
0.860666
0.537876
0.99839
0.467715
0.365
0.998324
0.995705
0.999754
0.998377
0.538726
0.960914
0.274477
0.998504
0.926294
0.998686
0.800311
0.285541
0.34065
0.926879
0.99839
0.413269
0.871269
0.444139
0.610024
0.234262
0.926846
0.996805
0.773437
0.473441
0.124815
0.146246
0.876624
0.507469
0.999058
0.681651
0.99905
0.912306
0.474944
0.999132
0.915259
0.443595
0.983147
0.946293
0.99851
0.757327
0.856182
0.923371
0.80597
0.815265
0.998608
0.843379
0.987014
0.999628
0.914701
0.987139
0.675234
0.863776
0.343729
0.924457
0.996859
0.613468
0.979058
0.802785
0.997376
0.998236
0.998316
0.924521
0.999183
0.933972
0.986696
0.999586
0.689878
0.922265
0.233865
0.797647
0.985303
0.828164
0.454311
-0.253151
-0.0463971
0.486646
0.518394
0.883104
0.986596
0.89102
0.744009
0.995225
0.998676
0.856295
0.807856
0.897556
0.703644
0.999038
0.986702
0.997031
0.999362
0.508224
0.929032
0.99941
0.23494
0.665622
0.913704
0.90207
0.835801
0.903666
0.997345
0.996278
0.994001
0.590264
0.915919
0.425601
0.578
0.986641
0.998616
0.922758
0.998858
0.983733
0.724192
0.545555
0.62156
0.907883
0.805665
0.998388
0.912824
0.998476
0.995442
0.962302
0.961787
0.925668
0.915191
0.997106
0.987068
0.824701
0.708705
0.957694
0.995243
0.915144
0.449611
0.891613
0.6716
0.913731
0.4299
0.452199
0.998466
0.89023
0.645754
0.923063
0.999733
0.994637
0.903603
0.413379
0.659605
0.720433
0.961913
0.993926
0.695903
0.999854
0.984199
0.58126
0.799106
0.266365
0.897113
0.736944
0.80393
0.897519
0.983432
0.950455
0.422179
0.998489
0.925176
0.948022
0.745467
-0.199531
0.396732
0.993789
0.877142
0.956189
0.846848
0.769184
0.995967
0.983191
0.907778
0.997491
0.925011
0.676665
0.971735
0.724524
0.997376
0.99789
0.916091
0.895193
0.349149
0.858026
0.927951
0.92152
0.039032
0.985775
0.791065
0.914525
0.915131
0.768571
0.501225
0.909279
0.99778
0.912565
0.913625
0.99701
0.99668
0.998995
0.913208
0.874243
0.549018
0.893976
0.250978
0.986083
0.984789
0.922691
0.92328
0.867018
0.998565
0.666965
0.69782
0.486839
-0.0151544
0.998977
0.925516
0.913243
0.997691
0.139262
0.925303
0.865452
0.962224
0.904144
0.960602
0.9864
0.0812466
0.081186
0.9013
0.669393
0.999385
0.877072
0.996332
0.910467
0.52157
0.984704
0.999524
0.326259
0.412966
0.96219
0.475614
0.923785
-0.336505
0.252699
0.775856
0.896223
0.99806
0.961068
0.995988
0.922973
0.998634
0.992823
0.9139
0.905323
0.998651
0.81101
0.985315
0.398068
0.286
0.98484
0.920357
0.439988
0.180708
0.985977
0.597763
0.9592
0.601396
0.868277
0.49661
0.999778
0.914395
0.56397
0.998112
0.858657
0.551125
0.983926
0.998889
0.205996
0.99914
0.113742
0.927394
0.421666
0.428298
0.91306
0.997847
0.998601
0.996188
-0.0379294
0.975959
0.986584
0.576294
0.997267
0.397148
0.938118
0.98604
0.888046
0.999386
0.958514
0.788896
-0.156854
0.96098
0.113895
0.923054
0.986425
0.986401
0.998664
0.744228
0.566493
0.801251
0.998719
0.972928
0.868399
0.895347
0.975105
0.999703
0.999131
0.997974
0.768615
0.986042
0.997437
0.307197
-0.0051775
0.926256
0.998234
0.556877
0.924694
0.987159
0.914546
0.74888
0.956105
0.336679
0.963136
0.997557
0.859296
0.924913
0.925693
0.792192
0.861065
0.441757
0.804966
0.856034
0.743814
0.542785
0.872917
0.878966
0.984486
0.999191
0.366397
0.996057
0.758132
0.937099
0.73056
0.308808
0.924786
0.305976
0.970044
0.996937
0.866361
0.676711
0.745246
0.998853
0.997494
0.525882
0.983268
0.872989
0.831063
0.231745
0.906665
0.985065
0.325617
0.904432
0.326265
0.733601
0.936741
0.814003
0.998063
0.677097
0.799273
0.921734
0.912466
0.998756
0.997091
0.998784
0.856326
0.99685
0.99934
0.914922
0.752137
0.397968
0.462216
0.992579
0.994911
0.189455
0.986163
0.0597783
0.997822
0.923103
0.987391
0.690499
0.997936
0.999641
0.996736
0.924832
0.996556
0.803824
0.232756
0.986088
0.886612
0.986103
0.818035
0.620335
0.928979
0.497773
0.997439
0.987148
0.960716
0.263243
0.732523
0.50915
0.997033
0.711348
0.997487
0.996194
0.63233
0.997466
0.995711
-0.0280855
0.877752
0.998967
-0.263782
0.179836
0.89321
0.387546
0.721423
0.998171
0.762257
0.689807
0.998912
-0.00957007
-0.136418
0.497923
0.986122
0.776474
0.994992

## Sheet: d60
cbc
0.650952
0.600397
0.925916
-0.0354261
0.779758
0.881183
0.889966
0.999403
0.639436
0.891
0.995413
0.962948
0.962678
0.73003
0.780627
0.615103
0.996257
0.983669
0.00561831
0.962786
0.297289
0.20706
0.911012
0.651954
0.924758
0.997588
0.914546
0.812543
0.0155028
0.470886
0.473025
0.877534
0.374821
0.996289
0.839442
0.999749
0.551562
0.998643
0.900954
0.207908
0.600868
0.881554
0.707421
0.999001
0.232865
0.788254
0.924905
0.762367
0.999374
0.912092
0.43906
0.917218
0.998776
0.998738
0.497677
-0.154761
0.962618
0.235064
0.331336
0.914771
0.340855
0.997721
0.987388
0.890828
0.79591
0.259566
0.491074
0.918488
0.917725
0.963056
0.6227
0.867695
0.926128
0.997934
0.431481
0.498019
0.454045
0.810977
0.913435
0.998721
0.999639
0.259732
0.91482
0.985802
-0.0270908
0.913303
0.920294
0.790704
0.800952
0.890947
0.241833
0.224129
-0.0771338
0.793183
0.962967
0.986596
0.914354
0.823638
0.777527
0.548763
0.984763
0.925701
0.986471
0.918037
0.891599
0.913979
0.950736
0.679799
0.891978
0.430289
0.670845
0.998887
0.0300823
0.914318
0.542072
0.985744
0.999264
0.984133
0.857524
0.998762
0.764129
-0.0112086
0.949695
0.914669
0.509896
0.998751
0.716541
0.998194
-0.128567
0.879111
0.985108
0.998716
0.669781
0.0916733
0.998774
0.476401
0.997477
0.590559
0.746106
0.986461
0.998586
0.999125
0.923856
0.878069
0.723576
0.811475
0.509265
0.915292
0.397393
0.577184
0.382057
0.998792
0.89532
-0.0596941
0.664651
0.984207
0.743493
0.9986
0.986642
0.612468
0.232627
0.983392
0.868182
0.886463
0.925309
0.985519
0.631007
0.953041
0.857818
0.997277
0.701889
0.99775
0.471379
0.996894
0.986706
0.948887
0.915662
0.888353
0.920129
0.963403
0.923643
0.297618
-0.167129
0.0355722
0.509425
0.876789
0.592576
0.98676
0.44143
0.948816
0.922884
-0.0711037
0.493202
0.922039
0.261547
0.417263
0.626681
0.905577
0.997648
0.99877
0.802077
0.999592
0.739632
0.99917
0.998249
0.912672
0.981003
0.89202
0.634027
0.996777
-0.244439
0.146548
0.852239
0.747778
0.311789
0.441466
0.504036
-0.232673
-0.0771549
0.99939
0.904156
0.0981729
0.995842
0.985879
0.373312
0.998396
0.958323
0.722136
0.997776
0.452106
-0.0378864
0.878299
0.887995
0.982671
0.999796
0.70738
0.82285
0.99775
0.810866
0.151754
0.103104
0.717103
0.822888
0.922227
0.813783
0.287671
0
0.996252
0.0390855
0.914064
0.607072
0.987223
0.792008
0.887565
0.882973
0.986344
0.687796
0.843672
0.102926
0.847773
0.502747
0.97247
0.926175
0.890131
0.997793
-0.0152024
0.708826
0.382457
0.309884
0.78077
0.996257
0.65083
0.91394
-0.23252
0.987329
0.998075
0.999871
0.991553
0.984929
0.175604
0.315445
0.688956
0.997083
-0.119437
0.998304
0.589318
0.382013
0.997148
0.0621879
0.959987
0.800158
0.995823
0.745915
0.99833
0.4869
0.30676
0.98648
0.926511
-0.233585
0.921469
0.00607067
0.923817
0.914735
0.346053
0.925597
0.809149
0.674097
0.590635
0.987208
0.985999
0.914379
0.913643
0.506748
0.216323
0.999005
0.857229
0.916062
0.887406
0.492494
0.876555
0.998974
0.915166
0.924804
0.373237
0.184859
0.996562
0.986154
0.59493
0.912575
0.195625
0.926693
0.793345
0.984683
0.886891
0.691055
0.997424
0.913075
0.49238
0.599184
0.590474
0.20072
0.99926
0.999012
-0.0406713
0.960739
0.997979
0.396607
0.577368
0.417411
0.212583
0.998216
0.624358
0.996126
-0.0569505
0.911515
0.135421
0.99908
0.915654
0.996095
0.746287
0.48047
0.478543
0.183438
0.881288
0.555198
0.727717
0.947381
0.998124
0.961073
0.89068
0.747873
0.925572
0.962972
0.316176
0.487627
0.21594
0.892056
0.533387
0.892278
0.924711
0.997418
0.89845
0.202448
0.998327
0.634963
0.813284
0.913445
0.567519
0.688944
0.88128
-0.0362422
0.999315
0.646038
0.983966
0.647097
0.997221
0.998427
0.982472
0.31549
0.202011
0.998895
0.998745
0.912304
0.987606
0.564001
0.520855
0.998763
0.923899
0.963127
-0.00504707
0.64281
0.986618
0.998502
0.986487
0.369787
0.868252
0.597564
0.948775
0.981128
0.645661
0.505592
0.50324
0.905867
0.716686
0.101197
0.913544
0.39598
0.721577
0.542305
0.986013
0.924124
0.89454
0.998691
0.29742
0.255656
0.654737
0.492633
0.86408
0.811888
0.892963
0.655327
0.290028
0.721175
0.146372
0.961361
0.877576
0.877554
0.975993
0.998202
0.878536
0.00562897
0.569668
0.452713
0.678352
0.341805
0.999565
0.912769
0.855941
0.574523
0.987035
0.63376
0.923473
0.998614
0.999076
0.384125
0.97435
0.998693
0.997227
0.986074
0.973361
0.998642
0.987521
0.219073
0.509608
0.99818
0.998341
0.998969
0.146201
0.913965
0.330457
0.224594
0.997576
0.733779
0.473012
0.918957
0.983862
0.460666
0.997034
0.551318
0.493537
0.342141
0.998984
0.947202
0.98672
0.986171
0.999873
0.375376
0.985606
0.999757
0.891386
0.385333
0.908035
0.867898
0.99633
0.873243
0.866988
0.984579
0.356052
0.751926
0.98689
0.398866
0.88089
0.98533
0.845742
-0.255179
0.925771
0.96281
0.997899
0.876242
0.31643
0.757707
0.591871
0.961278
0.915301
0.996584
0.276973
0.554823
0.913568
0.982872
0.774562
0.996683
0.985238
0.998341
0.99648
-0.0378082
0.963151
0.995309
0.91416
0.96914
0.924883
0.788209
0.998181
-0.274315
0.383505
0.232889
0.998992
0.999048
0.998417
0.998171
0.924216
0.928396
0.889646
0.503648
0.408923
0.913101
0.912404
0.26509
0.753144
0.986625
0.99935
0.632771
0.765351
0.500113
0.919019
0.984641
0.509536
0.99912
0.609142
0.243484
0.396435
0.999439
0.950649
0.996051
0.584615
0.995877
0.363589
0.88797
0.888438
0.358405
0.0245346
0.91337
0.998835
0.987324
0.999385
0.730688
0.0162397
0.232162
0.811042
0.598672
0.817355
0.0979935
0.91401
0.99873
0.559629
0.913728
-0.0570105
0.998141
0.999494
0.508742
0.998786
0.753056
0.731264
0.709928
0.998281
0.998455
0.994835
0.487983
0.643274
0.99698
0.494842
0.818201
0.201729
0.126187
0.523617
0.997371
0.98632
-0.055738
0.438215
0.983743
0.270184
0.905686
0.0162376
0.998908
0.343808
0.890578
0.998563
0.396295
0.255142
0.985064
0.998158
0.637314
-0.241741
0.995845
0.899017
0.525845
0.998005
0.0103551
0.998166
0.91712
0.526084
0.998559
0.610508
0.386253
0.421855
0.985447
0.998732
0.352344
0.893214
0.997139
0.92399
0.194029
0.999303
0.995364
0.927259
0.0225908
0.586037
0.707691
0.329362
0.962045
0.565172
0.984452
0.911846
-0.027199
0.912809
0.269926
0.877114
0.813187
0.565591
0.439064
0.987556
0.49197
0.981629
0.960603
0.999463
0.89731
0.962142
0.998916
0.998416
0.92373
0.917043
0.781038
0.232884
0.995646
0.540116
0.718738
0.868863
0.998435
0.753789
-0.211989
0.882959
0.453121
0.997617
0.962851
0.997823
0.924251
-0.253197
0.645569
0.341025
0.812089
0.202527
0.999653
0.730213
0.504139
0.997755
0.999412
-0.00517428
0.103015
-0.167861
0.994226
0.925561
0.540294
0.925493
0.997469
0.923466
0.870159
0.986327
0.892692
0.780135
0.595945
0.999165
0.998257
0.916341
0.997523
0.609717
0.912691
0.915664
0.548693
0.99636
0.993254
0.844131
0.985822
0.997832
0.999527
0.780194
0.997354
0.89312
0.908001
0.998921
0.935141
0.76448
0.311366
0.962592
0.396289
0.998681
0.90232
0.798827
0.395134
0.477683
0.740285
0.925268
0.961236
0.49695
0.999598
0.898262
0.914547
0.623461
0.369463
0.146461
0.287419
0.878646
0.914135
0.564143
0.924759
0.999513
0.33663
0.482571
0.99973
0.999161
0.264134
0.453662
0.863873
0.99889
0.366961
0.897196
0.525756
0.24353
0.775569
0.708566
0.801669
0.998358
0.590734
0.98197
0.998593
-0.315691
0.649139
0.6333
0.849748
-0.0379091
0.997921
0.999515
0.514171
0.80389
0.755234
0.985354
0.997887
0.962064
0.995194
0.999514
0.346598
0.99918
0.314254
0.998479
0.841709
0.912221
0.998651
0.811896
0.78357
0.959408
0.971932
0.980111
0.927326
0.997691
0.287301
0.340609
0.157205
0.961711
0.288545
0.999909
0.999666
0.590484
0.101062
0.598746
0.927859
0.400995
0.65157
0.997968
0.99631
0.833212
0.998498
0.670705
0.707603
0.998306
0.890132
0.645443
0.216291
0.999378
0.881132
0.997653
0.999518
0.311748
0.754859
0.913003
0.998936
0.819373
0.607252
0.949639
0.503745
0.982625
-0.210133
0.196652
0.916655
0.606229
0.68985
0.947536
0.998127
0.682359
0.961958
0.901676
0.164292
0.793221
0.999818
0.848324
0.999144
0.999612
0.654522
0.665677
0.179136
0.593304
0.43755
0.998192
0.43995
0.997469
0.997148
0.224248
0.973366
0.283672
0.186013
0.89949
0.47306
0.583379
0.189722
0.913069
0.843945
0.98575
0.627044
0.218719
0.999325
0.740524
0.706826
0.992154
0.810832
0.96101
0.995473
0.597855
0.929498
0.768462
0.890753
0.923606
0.960171
0.998592

## Sheet: d80
cbc
0.844918
0.999097
0.678497
0.654799
0.768444
0.914857
0.998885
0.304912
0.275637
0.833137
0.954078
0.124551
0.999121
0.912078
0.995747
0.901358
0.890628
0.997365
0.891226
0.802834
0.997181
0.58683
0.974074
0.998888
0.404894
0.925598
0.570587
0.792178
0.890416
0.666237
0.757191
0.243503
0.928661
0.845105
0.334796
0.494493
0.679293
0.924195
0.353311
0.899624
0.787114
0.91288
0.678246
0.987514
0.865468
0.522034
0.863371
0.994018
0.856699
0.285802
0.997829
0.9985
0.81126
0.457933
0.923838
0.870604
0.891557
0.541834
0.709853
0.466791
0.999554
0.349343
0.714468
0.696813
0.459032
0.844772
0.84891
0.756237
0.975692
0.999063
0.85454
0.928898
0.543349
0.983657
0.490233
0.994605
0.37783
0.366975
0.831541
0.687231
0.998038
0.912761
0.702639
0.999178
0.502991
0.959452
0.986913
0.897064
0.998773
0.655968
0.99822
0.916923
0.984142
0.655777
0.927194
0.843525
0.891059
0.816255
0.996365
0.839792
0.986878
0.993876
0.907987
0.997029
0.843546
0.458783
0.99891
0.931619
0.924904
0.986203
0.760366
0.391801
0.47603
0.910015
0.0918241
0.846618
0.616217
0.0862685
0.987576
0.98514
0.655623
0.59686
0.975144
0.381296
0.357419
0.149068
0.996933
0.986974
0.266251
0.877545
0.477266
0.764725
0.910509
0.998593
0.900176
0.878641
0.999345
0.997719
-0.0306041
0.986745
0.691161
0.997971
0.998329
0.999375
0.876668
0.916878
0.997484
0.976001
0.946648
0.996786
0.686643
0.173109
0.847257
0.997277
0.889405
0.999111
0.751842
0.974563
0.869132
0.678744
0.377056
0.902083
0.985104
0.986315
0.994902
0.19754
0.46738
0.857671
0.680741
0.830387
0.276619
0.553466
0.987384
0.604911
0.243719
0.869626
0.995122
0.89124
0.996156
0.999174
0.913498
0.476734
0.410739
0.0569633
0.880986
0.999755
0.999942
0.993952
-0.0360916
0.879761
0.447745
0.341852
0.998361
0.87425
0.959914
0.993373
0.320594
-0.0487384
0.844361
0.130404
0.998283
0.670605
0.970714
0.99699
0.986032
0.993194
0.818286
0.998787
0.92172
0.962234
0.856291
0.160487
0.555911
0.759029
0.814384
0.112702
0.910775
0.99939
0.526662
0.69997
0.341618
0.644059
0.743039
0.996154
-0.180569
0.99547
0.921612
0.845578
0.81928
0.912147
0.962895
0.769339
0.994034
0.129067
0.985951
0.351404
0.328245
0.795487
0.999329
0.996649
0.926035
0.844712
0.45764
0.811592
0.997787
0.999025
0.997586
0.677152
0.99526
0.999791
0.736572
0.753151
0.913557
0.961553
0.976355
0.35534
0.259215
0.539226
0.998494
0.282447
0.723843
0.885137
0.843835
0.961997
0.654798
0.37887
0.899985
0.998474
0.646007
0.474971
0.999307
0.997946
0.503715
0.460478
0.803199
0.635677
0.914208
0.9991
0.998319
0.55949
0.98657
0.491876
0.99972
0.914629
0.929256
0.998381
0.190003
0.915047
0.812021
0.574867
0.999008
0.497486
0.700178
0.986491
0.391987
0.828688
0.866341
0.927908
0.998275
0.99954
0.858756
0.985907
0.900468
0.949355
0.676162
0.927263
0.656014
0.818039
0.995696
0.0258208
0.755228
0.664656
0.103246
0.113637
0.914879
0.98567
0.999872
0.865111
0.996963
0.931044
0.803474
0.620986
0.999458
0.925192
0.521034
0.596903
0.997619
0.634855
0.510162
0.925184
0.961571
0.854667
0.430845
0.998762
0.0434258
0.741187
0.973159
0.974378
0.998151
0.405016
0.823682
0.743471
0.697607
0.575358
0.997891
0.900389
0.922796
0.986174
0.999288
0.657107
0.99706
0.789856
0.924736
0.666453
0.709036
0.998393
0.4411
0.467257
0.998318
0.276614
0.925346
0.839865
0.998933
0.924627
0.666252
0.923727
0.888646
0.993654
0.855182
0.986717
0.997114
0.983272
0.928218
0.598958
0.994303
0.850452
0.25292
0.0921233
0.697073
0.99849
0.691374
0.928558
0.405485
0.997907
0.353292
0.999301
0.998041
0.893221
0.779014
0.997132
0.93599
0.923438
0.997935
0.421295
0.996821
0.796188
0.74408
0.571783
0.9251
0.995339
0.756787
0.396609
0.406013
0.998938
0.995108
0.996899
0.92691
0.921133
0.389945
0.910917
0.484394
0.653665
-0.048689
0.999742
0.448114
0.704454
0.427672
0.258934
0.745498
0.395042
0.890378
0.337619
0.960695
0.98604
0.990132
0.295261
0.387616
0.655401
0.983998
0.424451
0.581953
0.999749
0.925103
0.97846
0.985207
0.913874
0.374064
0.926789
0.757002
0.572794
0.986185
0.762592
0.653797
0.666135
0.357101
0.430742
0.911287
0.907435
0.998949
0.767173
0.872898
0.921424
0.994466
0.569475
0.675164
0.960142
0.21872
0.526108
0.758723
0.99835
0.844811
0.834883
0.178852
0.388306
0.999113
0.96145
0.914848
0.994043
0.574491
0.916436
0.757768
0.677298
0.166121
0.925986
0.911171
0.655691
0.995794
0.913434
0.999023
0.997437
0.913439
0.356695
0.201054
0.993395
0.406019
0.33411
0.360308
0.811963
0.925875
0.867201
0.999186
0.384101
0.899046
0.35216
0.914951
0.912191
0.913543
0.997873
0.732578
0.999236
0.986195
0.994637
0.925408
0.769639
0.680205
0.926183
0.950834
0.778067
0.825731
0.387401
0.561817
0.924036
0.372269
-0.31885
0.610302
0.985008
0.914545
0.284175
0.401584
0.999331
0.67173
0.994867
0.720733
0.983526
0.811878
0.346275
0.297379
0.986023
0.999263
0.686983
-0.0881419
0.960984
0.998961
0.595309
0.350067
0.997585
0.91376
0.790017
0.994499
0.924187
0.880139
0.986736
0.858379
0.284008
0.232735
0.776211
0.584375
0.999702
0.846686
0.709832
0.986064
0.336341
0.542965
0.986135
0.983695
0.745632
0.809971
0.914072
0.997689
0.924735
0.801862
0.801887
-0.00567017
0.709528
0.725512
0.252681
0.63825
0.618189
0.731101
0.690639
0.950326
0.922657
0.999153
0.812822
0.997952
0.999367
0.0866094
-0.107348
0.68598
0.998548
0.276869
0.99912
0.0777592
0.0567545
0.899766
0.986553
0.9165
0.801264
0.401705
0.98415
0.998069
0.786457
0.999122
0.926655
0.746632
0.880864
0.85667
0.803453
0.918879
0.961539
0.994427
0.677046
0.926274
0.682449
0.464891
0.913175
0.993243
0.352587
0.984298
0.998465
0.308579
0.990086
0.890274
0.706913
0.99865
0.108459
0.915421
0.925518
0.674816
0.805119
0.995511
0.811869
0.985723
0.99812
0.755579
0.925235
0.911878
0.909904
0.999325
0.998843
0.707898
0.999504
0.914378
0.89964
0.987162
0.925646
0.901054
0.670343
0.933546
0.999187
0.962837
0.819549
0.93648
0.998094
0.532232
0.812207
0.892206
-0.101767
0.845865
0.308135
0.789786
0.986802
0.879029
0.985141
0.405923
0.924397
0.638839
0.744509
0.913147
0.788105
0.503241
0.341084
0.891107
0.997738
0.91413
0.728309
0.844961
0.913388
0.987013
0.931286
0.924503
0.98725
0.511591
0.405065
0.911409
0.293605
0.998492
0.928545
0.556279
0.917112
0.925792
0.718465
0.998426
0.674789
0.721817
0.508417
0.998015
0.877434
0.330773
0.997493
0.996514
0.924109
0.756637
0.999278
0.951399
0.800258
0.755232
0.986485
0.706054
0.986435
0.99865
0.929095
0.997545
0.800776
0.730093
0.786166
0.914244
0.985841
0.798552
0.998294
0.999421
0.986561
0.467916
0.855971
0.914617
0.753322
0.914233
0.924444
0.998725
0.999718
-0.0311333
0.998547
0.925358
0.417152
-0.00507404
0.185181
0.999231
-0.0360582
0.0462654
0.426728
0.102226
0.998047
0.925255
0.655324
0.39825
0.609089
0.708644
0.843965
0.845941
0.987176
0.687727
0.307394
0.539499
0.997493
0.891604
0.995561
0.928802
0.6553
0.985539
0.999955
0.857082
0.160695
0.915198
0.352965
0.482243
-0.221952
0.912819
0.999623
0.689384
-0.0595243
0.925379
0.676713
0.395816
0.672972
0.911151
0.949517
0.858011
0.997474
0.178689
0.37648
0.655014
0.999912
0.895456
-0.243361
0.986381
0.518503
0.780742
0.917175
0.198306
0.886429
0.895606
0.986939
0.75261
0.823896
0.999468
0.730089
0.925298
0.999178
0.656856
0.590247
0.998059
0.486524
0.923829
0.997859
0.987093
0.999483
0.313971
0.961163
0.99814
0.811589
0.808598
0.570328
0.977634
0.927344
0.0360391
0.699917
0.49411
0.617611
0.745762
0.999958
0.923087
0.997573
0.998768
0.924429
0.997379
0.899117
0.998962
0.999874
-0.11886
0.788736
0.520963
0.915278
0.66675
0.974187
0.995471
0.586644
0.609925
0.994795
0.99958
0.998414
0.998958
0.735269
0.972158
0.879353
0.997392
0.997934
0.809331
0.81097
0.995567
0.999114
0.67813
0.999372
0.554714
0.264189
0.998988
0.999244
0.997058
0.993219
0.999479
0.0863869
0.384794
0.963115
0.616882
0.728336
0.932153
0.997919
0.920719
0.6749
0.543796
0.381025
0.98649
0.617884
0.745969
0.655731
0.450095
0.862431
0.995606
0.800574
0.387615
0.928813
0.993769
0.999138
0.672683
0.997909
0.397386
0.805377
0.227696
0.997126
0.986974
0.676323
0.757575
0.960596
0.917673
0.909692
0.404785
0.746283
0.973235
0.913239
0.911462
0.890683
0.995929
0.293902
0.997718
0.99884
0.88939
0.707991
0.99613
0.517292
0.999414
0.396726

## Sheet: d100
cbc
0.96256
0.0655611
0.307568
0.827145
0.996197
0.778343
0.35454
0.903703
0.912398
0.298355
0.658897
0.906057
0.914524
0.146158
0.90924
0.621691
0.977142
0.260363
0.655795
0.834056
0.31916
0.834373
0.992166
-0.091915
0.731877
0.971941
0.365458
0.99787
0.883891
0.921749
0.997938
0.609059
0.997376
0.922944
0.202054
0.985498
0.809809
0.721807
0.344866
0.925799
0.670882
0.643262
0.909815
0.798972
0.901126
0.961028
0.856648
0.352836
0.828982
0.926927
0.329593
0.366715
0.83495
0.985758
0.996389
0.955885
0.91099
-0.0162654
0.860231
0.994659
0.262735
0.891775
0.890163
0.999403
0.998462
0.258041
0.920117
0.36635
0.766529
0.98467
0.592273
0.986347
0.399358
0.697105
0.998078
0.553236
0.983131
0.984909
0.90991
0.40899
0.298304
0.481005
0.832086
0.997214
0.720365
0.999189
0.728574
0.560813
0.999144
0.0455418
-0.0575111
0.610192
0.662127
0.821942
0.925874
0.9992
0.608941
0.33074
0.998135
0.187409
0.618024
0.217521
0.921433
0.856545
0.74649
0.961053
0.889822
0.913561
0.635544
0.92373
0.677652
0.848812
0.0108654
0.995976
0.330729
0.998166
0.81365
0.628333
0.590632
0.407511
0.889812
0.721301
0.7437
0.232026
0.857146
0.653252
0.998986
0.814278
0.996505
0.986049
0.922724
0.925413
0.405423
0.0925844
0.28747
0.998412
0.997549
0.808717
0.721786
0.924167
0.877001
0.408852
0.166175
0.98548
0.627951
0.676427
0.901771
0.888904
0.925408
0.997751
0.98763
0.283342
0.313137
0.889798
0.729687
0.844861
0.552963
0.330749
0.995764
0.0325954
-0.20015
0.0380536
0.588033
0.99915
0.856087
0.84447
0.71216
-0.076055
0.340113
0.997578
0.999165
0.998005
0.776322
0.998482
0.997848
0.997899
0.00515217
0.52234
0.834976
0.886691
0.925647
0.996134
0.659469
-0.0310802
0.425373
0.905788
0.997266
-0.0777797
0.27441
0.925675
0.996841
0.688253
0.735457
0.924517
0.329315
0.696043
0.996614
0.707227
0.769
0.995396
0.995153
0.855909
0.922988
0.994193
0.790436
0.577827
0.894611
0.90388
0.923622
0.922066
0.889766
0.924831
0.386669
0.645751
0.997003
0.914262
0.150069
0.994847
0.532941
0.360754
-0.0154134
0.996825
0.102907
0.995653
0.751874
0.891395
0.962216
0.882158
0.552217
0.844875
0.800598
0.635337
0.307606
0.592092
0.776455
0.722861
0.198398
0.924425
0.858711
0.926698
0.785524
0.432439
-0.139339
0.276735
0.240636
0.919916
0.757767
0.530456
0.384533
0.505878
0.816729
0.722957
0.619031
0.997885
0.91208
0.813895
0.597104
0.996652
0.812045
0.992987
0.813437
0.506472
0.994419
0.633759
0.738978
0.341357
0.997243
0.378831
0.921159
0.843995
0.135685
0.895596
0.721638
0.921021
0.9126
0.803931
0.98639
0.817459
0.0455744
0.405308
0.752239
0.262858
0.999454
0.996133
0.395834
0.405039
0.170556
0.913913
0.815018
0.701176
0.689831
0.81408
0.889649
-0.016248
0.921044
0.396469
0.802777
0.617196
0.876494
0.380265
0.241186
0.983135
0.998195
0.102823
0.787309
0.0672294
0.633736
0.366854
0.898277
0.920099
0.910502
-0.0915475
0.829931
0.891448
0.648253
0.531083
0.913189
0.994777
0.356713
0.667445
0.0759108
0.852628
-0.157048
0.916583
0.998718
0.99911
0.352414
0.812926
0.314078
0.874745
0.910925
0.733573
0.484027
0.999669
0.995313
0.961058
0.99745
0.778655
0.386
-0.103915
0.998211
0.80316
0.137622
0.685877
0.915377
0.913856
0.997294
0.904436
0.318312
0.170321
0.879009
-0.120129
0.290773
0.857028
0.914727
0.688312
0.674528
0.377025
0.774234
0.394904
0.626157
0.04897
0.983942
0.768901
0.959844
0.998979
0.994019
0.912869
0.285942
-0.214232
0.998216
0.997527
0.356128
0.996196
0.373211
0.735506
0.833289
0.409062
0.867037
0.752282
-0.0434496
0.899812
0.707921
0.999233
-0.139661
0.315843
0.661328
0.64837
0.492488
0.186823
0.894059
0.995989
0.856359
0.912678
-0.0325764
0.842225
0.88403
0.59676
0.340082
0.284073
0.98486
0.996364
0.835371
0.92129
0.357327
0.510149
0.996875
0.997272
0.913427
0.780212
0.938535
0.677425
0.258203
0.404811
0.707578
0.998819
0.915969
0.913241
0.490778
0.757988
0.753035
0.914618
0.986028
0.579141
0.998216
0.885595
0.925944
0.166375
0.823173
0.433799
0.892168
0.913333
0.855224
0.995957
0.997503
0.927649
0.925491
0.984891
0.975364
0.723094
0.242904
0.236216
0.325362
0.999351
0.997782
0.109249
0.146046
0.923435
0.836743
0.914596
0.624764
0.857482
0.998577
0.997965
0.996615
0.733829
0.368892
0.395266
0.997142
0.998611
0.963574
0.998018
0.159705
0.751944
0.746501
0.187126
0.455371
0.985637
0.874882
0.914255
0.921897
0.923096
0.139502
0.600272
-0.115387
0.833993
0.786011
0.998672
0.634093
0.903096
0.747424
0.997523
0.955947
0.867126
0.166025
0.914551
0.515636
0.997847
0.998309
0.999015
0.994254
0.922736
0.959573
0.878502
0.972972
0.899861
0.822791
0.998762
0.637229
0.85563
0.778438
0.547814
0.296255
-0.0487262
0.999044
0.996833
0.551019
0.974698
0.243346
0.475072
0.856697
0.372595
0.524153
0.635157
0.997596
0.984047
0.725191
0.0152111
0.28381
0.925084
0.998271
0.985252
0.998575
-0.08097
0.90377
0.360267
0.914322
0.767014
0.367887
0.9585
0.98352
0.996313
0.998554
0.289727
0.356056
0.340885
0.926085
0.607029
0.751012
0.914405
0.777449
0.830922
0.999263
0.746536
0.922647
0.320966
0.367463
0.228195
0.750646
0.875153
0.961034
0.718228
0.889927
0.961122
0.996164
0.409026
0.170595
0.985716
0.633173
0.961448
0.854033
0.894352
0.982935
-0.240707
0.366957
-0.157035
-0.0486794
0.925485
0.998642
0.303141
0.755006
0.481637
-0.0306069
0.891374
0.365993
0.456277
0.258707
0.618139
-0.00542108
0.924244
0.869021
0.891498
0.744576
0.880813
0.972192
0.71068
0.858656
0.99844
0.875525
0.998144
0.793721
0.831551
0.984844
0.998957
0.533516
0.757202
-0.0433487
0.847646
0.997959
0.892718
-0.0378588
0.63148
0.985974
0.557976
0.985235
0.983545
0.870225
0.921131
0.923861
0.59779
0.227819
0.98562
0.34501
0.272283
0.996986
0.996024
0.912533
0.961443
0.742824
0.654691
0.924835
0.995547
0.634756
0.808989
0.34108
0.852785
0.994019
0.0414398
0.853209
0.654572
0.491559
0.995976
-0.201407
0.905584
0.996613
0.754528
0.319255
0.879285
0.997767
0.844319
0.340573
0.92567
0.960514
0.0544644
0.891789
-0.178498
0.971292
0.925221
0.973403
0.691367
0.996431
0.745766
0.926359
0.912125
0.961466
0.296305
0.373419
0.29726
0.855772
0.503209
0.0985724
0.825527
0.923865
0.925865
0.92309
0.41614
0.390649
0.883247
0.412046
0.96098
0.951014
0.997631
0.712555
0.465099
0.75453
0.878445
0.997594
-0.00542091
0.385861
0.948976
0.999105
0.405769
0.995842
0.309601
0.983412
0.997909
0.186648
0.0151898
0.925736
0.90249
0.912284
0.998181
0.884872
0.699426
0.407587
0.844461
0.849699
0.665948
0.753545
0.924507
0.843549
0.997901
0.913061
0.845842
0.339289
0.781273
0.986405
0.25842
0.995409
0.162722
0.986247
0.877676
0.0655766
0.381461
0.923759
0.425866
0.671633
0.90536
0.995717
0.999391
0.504377
0.996943
0.973237
0.98415
0.876983
0.999198
0.84039
0.971624
0.997885
0.901102
0.914859
0.925949
0.82828
0.824886
0.998654
-0.129137
0.857596
0.923499
0.335486
0.8378
0.809832
0.508824
0.242587
0.380695
0.617021
0.398059
0.373531
0.986724
0.961579
0.0151918
0.40515
0.922528
0.998736
0.997934
-0.470865
0.720781
0.157926
0.871253
-0.0434532
0.664467
0.994881
0.801527
0.405576
0.358484
0.707256
0.996701
0.717323
0.381549
0.479776
0.975671
0.396126
-0.0378047
0.996838
0.676989
0.369204
0.998598
0.979647
0.946916
0.836771
0.425051
0.322655
0.444981
0.999619
0.665079
0.997258
0.926064
0.8893
0.998842
0.906394
0.91315
0.997165
0.354336
0.190099
0.319852
0.881246
0.00515238
0.542216
0.741763
-0.183983
0.340844
0.661647
0.813434
0.114356
0.536807
0.55065
0.414057
0.996841
-0.233232
0.986364
0.346716
0.973872
0.913874
0.999483
0.656314
0.629839
-0.0759479
0.617037
0.97335
0.913766
-0.0152034
0.848677
0.981542
0.404281
0.946827
0.918661
0.232176
0.923142
0.99739
0.652076
0.853752
0.200837
0.910704
0.927103
0.835156
0.914975
0.875924
0.984601
0.178274
0.642147
0.997381
-0.0311343
0.983221
0.913584
0.0220608
0.924652
0.655391
0.961747
0.689314
0.184735
0.924612
0.996284
0.622016
0.922751
0.340238
0.922908
0.961185
0.165582
0.994372
0.986147
0.410357
0.637499
0.985077
0.996074
0.985629
0.925901
0.962559
0.666201
0.424864
0.722769
-0.0557881
0.901604
-0.300039
0.367622
0.746154
0.700105
0.998572
0.838488
0.45596
0.395222
0.590946
0.911787
0.997296
0.999404
-0.0457832
0.997617
0.319737
0.810316
0.994201
0.0917374
0.868713
0.774808
0.218186
0.706948
0.908515
0.409384
0.474564
0.912183
0.997248
0.981969
0.982099

## Sheet: d120
cbc
0.221639
-0.277247
0.858059
-0.0877776
0.455712
0.0155207
0.843212
0.610422
0.375066
0.286875
-0.0270208
0.660239
0.906454
0.116707
0.248515
0.908649
0.791942
0.572401
0.757042
0.28358
0.958474
0.924225
0.839607
0.912875
0.855745
-0.13087
0.388156
0.304702
0.344996
-0.0660655
0.0810358
0.493062
0.0152084
-0.336848
0.80163
0.446162
0.902968
0.352252
0.323116
-0.12914
0.744224
0.304656
0.77482
0.587711
-0.176211
0.489364
0.356133
0.325406
0.492768
-0.0567216
0.243008
0.15744
-0.0464226
0.911197
0.642782
0.776126
0.858039
0.308183
0.973992
0.263914
0.510242
0.868397
-0.113124
0.39483
0.329978
0.470571
0.352363
0.531373
0.230473
0.427545
0.518264
-0.402788
0.254247
0.304308
-0.101684
0.880928
0.307697
0.350376
0
0.357941
-0.607158
0.417108
0.224693
0.340025
0.442503
0.910951
-0.129292
0.588687
0.388224
-0.029178
0.255027
0.483705
0.314236
0.244224
0.376585
0.532538
-0.0465832
-0.174726
-0.113367
-0.101678
0.841061
0.924123
0.767626
0.912817
-0.0880639
0.857129
0.804795
0.252502
0.791818
0.676987
0.377123
0.462455
0.778766
0.29349
0.46141
-0.156805
-0.396479
0.749466
0.973846
-0.0361892
0.857072
-0.0269151
-0.0257776
0.767754
0.0271656
-0.196631
0.788889
0.759889
0.00515867
0.0254438
0.102977
0.469464
-0.157042
0.587901
0.201899
0.395435
0.688987
0.898212
0.400817
0.618684
0.0154886
0.0560611
0.861368
-0.378967
0.744309
0.963893
-0.00517412
-0.178285
0.015206
-0.0434454
0.460181
0.099456
-0.482028
0.450903
0.85535
0.876457
0.17351
-0.0054091
0.455289
0.286304
0.530611
0.526977
0.71963
0.766545
0.891435
0.470799
0.316777
0.329555
0.41587
-0.00538339
-0.701209
0.869143
0.916763
0.921262
0.912519
0.0518715
-0.0659756
0.917465
0.340116
-0.572706
0.9129
0.211876
0.119072
0.286797
0.589898
0.610964
-0.0825603
-0.223207
-0.0948855
0.910717
0.254391
0.868274
0.799605
0.233086
0.0700607
0.573373
0.237084
-0.509478
0.384196
0.777718
0.803207
0.178031
0.835901
0.651894
-0.325998
0.572127
0.23767
0.437918
0.00516343
0.323994
0.838664
0.722219
0.419002
-0.295515
0.388615
0.287312
0.821781
-0.0965018
0.915165
0.889057
-0.0871281
0.49292
0.0162591
0.286844
0.587999
0.287605
0.77057
0.315479
0.901901
0.0151883
-0.0392434
0.277092
-0.0884487
-0.0486948
0.538828
0.273828
0.832699
0.731896
0.421798
0.759667
0.389347
0.26605
0.17451
0.974574
0.016216
0.880717
0.939918
0.491702
0.0909483
0.813454
-0.208932
0.744847
0.255028
0.471177
0.05963
0.365321
-0.0657323
0.146956
0.461068
0.427395
-0.647643
0.893117
0.770957
0.797278
0.562825
0.025398
0.750482
-0.0206735
0.0966749
-0.354066
0.842277
-0.112268
0.923656
0.530801
0.93443
0.638342
0.461377
0.330443
0.0839799
0.396963
0.283519
0.324141
0.0258599
-0.065849
0.220458
-0.056864
0.50932
-0.207887
0.772872
0.579227
0.34321
0.116676
0.0152206
0.710152
0.843888
0.387911
0.055505
0.394886
0.437871
0.323838
0.48293
-0.182612
0.901829
0.924101
0.28686
-0.389703
0.277631
0.304168
0.73558
0.84614
0.898853
0.145765
-0.113859
0.202281
-0.00487533
0.811555
0.283224
-0.00517003
0.899573
0.877656
0.735442
0.787692
0.801132
-0.479358
0.812984
0.161854
0.324518
0.384644
0.500336
0.571649
0.422975
0.911991
-0.0950698
0.497685
-0.036207
0.323507
0.532438
0.67944
0.840909
0.666819
0.475993
0.402356
0.854504
-0.0463814
0.00273406
0.409213
0.56285
-0.248803
0.382804
0.38539
0.735227
0.228771
0.419205
0.356718
0.600026
0.643461
0.0257865
0.825831
-0.208166
0.407184
0.394632
0.397084
0.766236
0.834073
0.834486
0.41722
-0.302815
0.363537
0.547617
0.310669
0.911315
0.358558
0.357184
0.361924
0.597405
-0.0569421
-0.32606
0.286963
0.376714
0.249447
0.518952
0.308982
-0.0463762
0.58921
0.850787
0.679682
0.341489
-0.265311
0.633158
-0.00516895
0.530511
0.729501
0.200349
0.201386
0.481107
0.743998
0.552718
-0.188202
-0.066106
0.34198
-0.178225
0.0152047
0.938513
-0.189236
0.05559
0.304317
0.640443
0.60795
0.816688
0.856603
0.123877
0.405595
0.140585
-0.611981
0.30873
0.2868
0.108528
0.768442
0.355171
0.285872
0.30867
0.727946
-0.325255
0.825508
0.791063
0.875956
0.856472
0.983461
0.68064
0.847108
0.214241
0.233563
0.427865
0.781501
0.503642
0.0595933
-0.233215
0.912045
0.0623616
0.140318
-0.289194
0.680142
0.283445
0.404253
-0.178158
0.0152418
0.571095
-0.150734
0.329239
-0.658935
0.300229
0.920816
0.0161911
0.852812
0.912438
0.596872
0.885364
0.174573
0.140218
0.308626
0.469742
-0.170093
0.00516631
0.114548
0.611018
0.805135
-0.450354
-0.52671
0.722024
0.719848
0.900006
0.769272
0.0253549
0.599161
0.186882
0.802806
0.237664
0.956236
0.113984
0.356032
0.520228
0.842369
0.00516141
0.307628
0.418866
-0.0947944
0.903194
0.679233
0.840032
0.0163691
0.0253881
-0.0922103
0.572995
-0.00539264
-0.0360542
0.153139
-0.191901
0.723872
0.0862297
-0.0568754
0.430533
0.268024
0.287131
-0.607867
0.869468
0.759066
0.323718
0.0152496
0.655821
0.318611
-0.102762
0.402167
-0.701993
0.606441
0.284172
0.908381
0.766649
0.0152232
-0.0544972
0.286407
0.924236
-0.0499824
0.669161
0.250947
0.817951
0.286832
0.232817
0.468655
0.511597
0.388584
-0.251446
0.766042
0.263869
0.73183
0.471336
-0.0257832
0.0155037
0.362789
0.339937
-0.387878
0.663435
0.974646
0.643568
0.687659
0.293447
0.350637
0.813897
-0.263193
0.743364
0.252415
0.354121
0.914473
0.562518
0.912279
-0.102799
0.852606
0.120992
-0.308691
0.743242
0.283582
0.323339
0.885493
0.233335
0.325971
-0.150768
-0.113774
0.163361
0.254819
0.211926
0.871755
0.539002
0.0051684
0.973333
0.470833
-0.483266
-0.0613851
0.304758
0.83361
0.816356
0.912815
0.885413
0.0152368
0.254467
0.742845
-0.157848
0.774728
0.280008
0.356526
0.56108
0.549196
0.667976
0.936624
0.504236
0.062185
0.383492
-0.05686
0.859914
0.81427
0.83973
0.767572
0.319882
0.69179
-0.701024
0.287045
0.00516369
0.356219
0.925558
0.341502
0.568209
0.779454
0.251768
-0.318217
0.383584
0.583571
0.959101
0.852478
0.548749
0.193641
-0.245573
0.388094
0.10605
0.84105
0.355885
-0.0361457
0.538603
0.00516757
0.699496
0.925376
0.244347
0.0239376
0.538803
0.716983
0.323354
0.877176
0.87549
0.418808
0.0271702
0.329351
0.262619
-0.0394229
0.650513
-0.00516799
-0.221964
0.679404
0.912792
0.473584
0.774109
0.0488098
0.59904
0.355265
0.903908
0.0812263
0.00516819
0.427476
0.697355
0.526052
-0.0849665
0.224317
-0.0162587
0.923931
0.0336301
0.98183
0.527072
-0.156123
0.586381
-0.232441
0.764446
0.266253
0.848809
0.849529
0.861641
0.0152175
0.773376
0.61119
0.68792
0.775491
0.35797
0.893217
0.00516896
0.438162
0.147182
0.869398
0.252023
0.251992
0.901258
0.654526
-0.0964923
0.347455
0.102458
-0.0257713
0.865678
-0.0509344
-0.530649
0.244222
0.657696
0.323768
0.751856
0.898626
0.652324
0.609606
0.374703
0.0870622
0.283875
0.113691
0.32342
0.356178
0.63475
0.666048
0.60326
0.611128
0.0615298
0.557333
0.698541
0.87518
0.962418
0.40585
0.285947
0.0305548
0.263474
-0.247678
0.397468
0.8057
0.309397
0.254642
-0.177908
0.0151993
0.405256
0.14039
-0.618858
0.394662
-0.0362082
0.341908
-0.19481
0.116376
0.14723
-0.208416
0.387324
0.237409
0.886863
0.27754
0.859735
0.0363097
0.536418
0.74103
-0.0829213
0.402296
-0.702523
0.745464
0.973945
0.786183
0.264528
0.766583
0.589557
0.264679
-0.269227
-0.0851052
0.497442
0.508304
0.177809
0.543794
0.0152302
-0.210564
0.645244
0.470733
-0.022419
0.698674
0.850715
0.830618
0.254469
0.689155
0.500917
0.249276
0.508825
-0.131081
0.610912
0.481388
0.71109
0.470744
0.588876
0.755879
-0.172698
0.262414
-0.310081
-0.19753
0.770387
0.92193
0.787197
-0.0659909
0.220268
0.609934
0.835281
-0.170551
0.345287
0.576188
0.91682
0.0811042
0.884212
0.326799
0.428329
0.201929
0.733375
-0.129085
0.651226
0.356281
0.766322
0.103338
0.577292
0.908278
0.0432357
-0.607011
0.614021
0.376951
0.251143
0.727739
0.745158
-0.114049
0.286793
0.384621
0.217784
0.616147
0.27183
0.566673
0.839529
0.813133
0.0253843
0.341925
0.28683
-0.237966
0.0728928
0.677496
0.362444
0.570016
0.746816
0.744877
0.919958
0.339831
-0.0918274
0.200738
0.356569
0.211797
0.850974
0.924092
0.537143
0.911029
0.731396
-0.208655
0.662896
0.739743
0.0951207
0.186439
-0.0658552
-0.0922058
0.460937
0.774982
-0.660036
0.632787
0.668268
0.584286
0.906478
0.376371
0.830699
0.282669
0.254638
0.15733
0.362616
-0.0568635
0.441953
0.841336
0.935909
-0.0657938
0.542672
0.388146
-0.00538105
0.286794
0.916692
0.906422
0.264353
-0.00516423
0.113517
0.416815
0.714134
0.41821
0.322166
0.841246
0.303845
0.387802
0.123614
0.147362
-0.151455
-0.0508056
0.526193
0.217924
0.879939
0.910872
0.875573
0.620825
0.396805
-0.455731
0.388321
0.135316

## Sheet: d140
cbc
-0.593288
-0.46467
-0.451453
-0.644712
-0.79521
-0.529004
-0.406248
0.526501
-0.423095
0.67123
0.168703
0.619867
-0.715992
-0.694572
0.185
0.699234
-0.540408
0.620724
-0.225758
-0.295757
-0.263952
-0.442383
-0.186921
-0.44225
-0.629907
-0.419293
0.238804
0.624283
0.549532
-0.354022
0.345607
-0.646104
-0.319104
-0.481747
-0.726347
-0.543041
-0.416821
-0.485259
-0.553064
-0.719404
-0.485556
0.696207
-0.434232
-0.642567
0.611637
-0.540202
-0.465606
-0.510793
0.523905
-0.694814
-0.345518
-0.435725
-0.307673
-0.325997
-0.600252
-0.112041
-0.65005
-0.81097
0.0559676
-0.673857
-0.187556
0.333539
-0.267622
-0.681983
-0.190012
0.443141
0.200812
-0.738525
0.432934
0.731421
-0.643851
-0.495344
-0.23822
-0.0861782
-0.0414337
0.0327116
-0.465439
-0.357772
-0.556614
-0.281715
0.768129
-0.173891
-0.49201
0.126875
-0.525871
0.814181
-0.534903
-0.178447
-0.694727
-0.505843
-0.644159
0.312273
-0.510182
-0.288658
-0.363756
-0.137452
0.201508
-0.12892
0.0616375
-0.413995
0.597321
-0.526763
-0.642537
0.547194
0.5753
-0.571759
-0.504972
0.520771
-0.644711
-0.0487628
0.892773
-0.629002
0.538
-0.271226
-0.655601
-0.307682
0.532701
-0.396685
-0.381354
-0.65437
-0.039038
-0.0487606
0.933465
0.213565
-0.539859
-0.340028
-0.762741
-0.525918
-0.650822
-0.67989
0.470282
-0.60193
-0.72935
-0.51846
-0.217955
0.746986
-0.381785
0.716803
0.647215
-0.279489
-0.475346
-0.0280323
-0.575308
0.129244
-0.0951723
-0.491066
-0.358994
-0.488126
-0.684597
0.543959
-0.655987
-0.576868
0.10643
-0.643523
0.364669
0.577916
-0.639746
-0.696989
0.29201
-0.491536
-0.670331
-0.452707
0.604819
0.913465
-0.569101
0.742184
-0.650854
-0.451785
-0.585762
-0.29811
-0.191742
-0.11198
-0.465352
-0.241058
-0.535184
-0.332904
-0.326169
0.27644
-0.522082
0.405419
-0.172253
0.100982
-0.253972
0.242327
-0.230182
-0.222047
-0.139906
-0.539933
0.036176
0.491008
-0.807326
0.499765
-0.728147
-0.168186
-0.416992
-0.430473
-0.418808
-0.412848
0.664295
-0.383964
0.943334
-0.267828
-0.327597
-0.402493
-0.478629
-0.0153121
-0.445311
-0.466397
-0.416584
-0.509719
-0.709266
-0.490299
-0.394441
-0.478753
-0.460925
-0.625072
-0.566206
0.34024
-0.401666
-0.794167
-0.738974
-0.575104
-0.307409
-0.631703
-0.400961
-0.268829
0.503928
-0.264202
-0.765682
-0.522051
0.798801
-0.227283
0.416659
-0.461459
-0.805314
-0.401759
-0.352637
0.156012
0.606793
0.569581
-0.298179
-0.0568245
0.74141
0.27387
-0.323005
0.2222
-0.479021
-0.15596
-0.357259
-0.624826
-0.470546
0.342721
0.703285
0.421805
0.0962801
0.254231
-0.457059
-0.357548
-0.621175
0.384188
-0.540148
-0.0719312
0.233223
-0.429285
-0.719153
0.566972
-0.337908
-0.329716
-0.542806
-0.608247
-0.0162586
-0.364932
-0.379649
-0.359902
-0.0101389
-0.602407
-0.547283
0.338873
-0.540523
0.106543
0.628224
-0.665477
-0.439658
-0.713717
-0.574434
-0.64735
0.30443
-0.239015
0.246959
-0.378834
0.0392675
0.0097015
-0.649553
0.0168553
-0.227915
-0.642254
0.624378
-0.396357
-0.592319
0.252809
-0.785918
0.0786748
0.282782
-0.49276
0.373015
-0.16955
-0.539766
-0.437339
-0.157115
-0.682784
-0.258403
0.0052429
-0.452716
-0.552228
-0.631678
-0.365104
-0.408562
-0.359209
-0.236537
-0.574569
-0.0810122
-0.518609
0.0838144
-0.537442
0.565466
-0.456303
-0.0716662
-0.602696
-0.810967
-0.409585
-0.307653
-0.410453
0.573876
-0.364744
0.230657
-0.529723
-0.437843
-0.591091
-0.409534
-0.481691
-0.0484144
-0.673816
-0.497317
-0.625406
-0.438706
-0.575429
-0.515228
-0.445885
-0.227448
-0.5399
-0.483418
-0.592663
0.410725
-0.157174
-0.684437
-0.564052
0.667029
-0.655331
-0.521718
0.19693
-0.521906
-0.527425
0.290892
-0.078724
-0.344215
-0.368164
-0.108427
0.53887
-0.644837
-0.447766
0.396483
-0.156963
0.198507
-0.699246
0.0785943
-0.530167
-0.476129
-0.57696
-0.245663
-0.319819
0.232997
-0.78695
-0.145899
-0.340516
-0.580658
0.46551
0.656463
-0.425029
-0.593449
-0.252797
-0.721295
-0.464518
-0.317969
0.223244
0.157016
0.412596
-0.762859
-0.457523
0.826105
0.308214
-0.170236
-0.528039
-0.367041
-0.580703
0.385675
-0.16219
-0.805827
-0.525509
0.105906
-0.647858
0.537882
-0.556699
0.184951
-0.483681
0.264382
0.453201
-0.447725
-0.503765
-0.695128
0.501966
-0.241648
0.408823
-0.284597
0.811858
-0.380481
0.308791
-0.765681
-0.0974668
-0.530671
-0.49179
-0.678791
-0.279582
-0.471577
-0.353867
-0.405247
-0.667253
0.45964
0.748495
0.385746
-0.507392
-0.462767
-0.172431
-0.597258
0.113937
0.470593
-0.683089
-0.327426
-0.170633
-0.547578
-0.569001
-0.591955
-0.46975
-0.405072
-0.726702
-0.540015
0.00524834
-0.406488
-0.708609
-0.233087
-0.0162567
-0.573947
-0.43258
0.106673
-0.551994
0.898582
-0.29813
-0.641817
0.805757
0.829018
0.863367
0.64317
-0.119895
-0.638314
0.660696
-0.146785
0.106503
0.135734
0.0791012
-0.328082
0.407424
-0.146141
-0.573835
-0.405376
0.0504405
-0.508224
-0.461723
0.127293
-0.527225
0.342339
-0.360047
-0.475249
-0.484078
-0.218573
-0.5034
-0.307606
0.835363
0.592764
-0.650028
-0.669026
-0.441907
0.565091
-0.223823
-0.121935
-0.483244
0.812124
-0.229973
-0.405966
-0.668333
-0.265484
-0.485111
-0.63213
0.40968
0.456512
-0.715632
-0.328233
-0.381654
0.105128
0.532815
-0.612974
-0.555047
0.129293
-0.0192333
-0.424409
-0.815092
-0.446091
0.341531
-0.717288
0.576734
-0.630479
0.224276
-0.462912
-0.41422
-0.383519
0.767873
0.595445
0.547109
0.661548
-0.182261
-0.170405
0.330723
-0.464677
-0.523835
0.0412896
-0.597188
-0.694113
-0.0811141
-0.728032
-0.139784
-0.569428
0.0054162
-0.32286
-0.488582
-0.650646
-0.528775
0.117443
-0.65715
-0.342574
-0.461881
0.823649
-0.596582
-0.278913
-0.667881
0.124999
-0.410461
-0.238102
-0.495961
0.601667
-0.60117
0.699961
-0.345307
-0.356998
-0.241112
-0.404242
-0.432466
-0.400934
-0.121902
-0.574593
0.445465
-0.263767
-0.576097
-0.124849
-0.404589
-0.531424
-0.106678
-0.139717
-0.172411
0.699778
0.230276
-0.377845
0.196108
-0.221732
0.201042
0.0102242
0.385598
0.377951
-0.450751
0.263331
-0.530399
0.330911
-0.275782
-0.400844
0.0862501
-0.492992
-0.361098
-0.262677
-0.0305567
-0.157176
-0.613364
-0.117961
-0.162405
-0.330403
0.124541
-0.262729
-0.0862398
-0.291839
-0.650391
-0.265853
0.67143
-0.657704
-0.308145
0.417016
-0.521703
-0.0377948
-0.456972
-0.609478
-0.43027
-0.295068
-0.533613
-0.539612
0.537815
-0.00541896
0.100922
-0.319381
0.574758
-0.715774
-0.531528
-0.458915
-0.452949
-0.522329
-0.328438
-0.44438
0.914471
-0.174005
-0.162959
0.523041
-0.709275
-0.306404
-0.462855
0.842584
-0.506667
-0.405881
0.276574
-0.265373
-0.403372
-0.227067
-0.178438
0.751711
0.565682
0.138081
-0.35244
-0.76605
-0.528029
-0.404794
0.485682
-0.708128
0.263417
-0.319678
-0.644746
-0.253347
-0.685261
-0.135742
-0.356381
-0.674482
-0.298566
-0.462813
-0.146153
0.308812
0.768126
-0.531885
0.785798
-0.358384
-0.410839
-0.634473
-0.311643
0.474405
-0.21791
-0.465461
-0.184466
-0.26594
0.487712
0.0632752
0.054187
-0.584768
-0.328279
0.78489
-0.37945
-0.1602
-0.362323
-0.127337
-0.0341497
-0.573306
-0.4343
-0.254065
0.123253
-0.529079
0.123392
0.223398
-0.317129
-0.10613
-0.161869
0.116933
-0.623714
-0.695373
-0.663558
-0.540229
0.542536
-0.364431
-0.489773
-0.478615
0.233493
-0.264282
0.0335128
0.654567
-0.336127
-0.270699
0.0501438
-0.671037
-0.452763
-0.200521
-0.2459
-0.416389
0.922046
-0.654336
-0.528796
0.184664
0.223532
-0.385908
0.12418
-0.612084
-0.323232
0.0392843
-0.650308
-0.459416
-0.410002
-0.479336
-0.492303
-0.464648
0.826108
-0.383856
0.117286
0.106993
0.184752
0.222631
-0.728435
-0.517586
-0.462263
0.555604
-0.389847
0.258315
-0.621058
0.0763005
-0.340525
0.140049
-0.53789
-0.484021
0.790204
0.709451
0.776597
-0.681551
-0.485489
-0.0808377
-0.299746
-0.631993
0.640699
-0.245215
-0.218833
-0.0861242
-0.471484
-0.596271
0.537162
-0.710053
-0.302016
0.623183
-0.470883
-0.433723
-0.554515
-0.288495
-0.718176
0.258766
-0.264698
-0.330416
-0.462438
-0.593671
0.680901
-0.344559
-0.512266
-0.139849
-0.534167
-0.491048
-0.537978
-0.459938
0.351986
0.484299
-0.624657
-0.739082
-0.528897
0.815057
-0.522471
-0.308084
-0.623392
-0.134721
-0.273834
-0.344766
-0.698999
-0.670393
0.123553
-0.358373
-0.495132
0.599029
0.41248
-0.449464
0.69605
-0.147035
0.141398
0.0948855
-0.519165
-0.57166
0.441021
-0.471155
-0.283906
-0.439459
-0.480584
0.0703607
-0.730793
-0.0702021
0.09327
-0.0654072
-0.501601
-0.507602
-0.644896
-0.558693
-0.614044
-0.243595
-0.1701
-0.592306
0.117029
-0.171613
0.0506597
-0.485181
-0.00240657
-0.140082
-0.592842
-0.510453
-0.41888
0.417513
-0.00542781
0.134564
-0.510984
-0.531706
-0.377225
-0.437951
-0.655508
-0.227665
0.554152
-0.232747
-0.1347
-0.571723
-0.576793
0.0760285
-0.409535
-0.502811
-0.641934
0.865454
0.864984
-0.602385
0.320022
0.647902
-0.162262
-0.233512
-0.726645
-0.307648
-0.0392075
-0.243869
-0.521992
-0.539057
0.0168291
-0.638315
0.414179
-0.307522
-0.238643
-0.458341
-0.470518
-0.382797
-0.291642
0.669322
-0.57457
0.117699
-0.519055
-0.571252
-0.311737

## Sheet: d160
cbc
-0.6112
-0.629132
-0.559307
-0.0950417
-0.594649
-0.648772
-0.224612
0.71479
-0.588137
-0.461329
-0.365272
-0.610893
-0.693589
-0.586096
-0.663874
-0.613015
0.0915789
-0.708416
-0.60832
-0.70305
-0.581826
-0.635601
-0.63747
-0.565816
-0.54083
-0.750685
-0.582233
-0.308611
-0.575881
-0.728789
-0.508737
-0.587563
-0.66359
-0.542977
-0.584325
-0.598306
-0.689616
-0.640098
-0.582357
-0.716804
-0.590627
0.680401
-0.64952
-0.750386
-0.389984
-0.682678
-0.600539
-0.520799
-0.77257
-0.598675
-0.662209
-0.199877
-0.506406
-0.544497
-0.73866
-0.0405179
-0.656973
-0.661989
-0.701181
-0.566721
-0.637715
-0.576643
-0.649063
-0.60374
-0.592054
-0.700356
-0.634241
-0.657199
-0.606094
-0.668424
-0.709121
-0.557346
-0.703759
-0.361713
-0.342576
-0.53071
-0.6397
-0.632223
-0.689826
-0.573714
-0.595347
-0.618626
-0.553406
-0.631707
-0.590719
-0.655254
-0.649204
-0.571676
-0.604489
-0.613863
-0.675362
-0.704179
-0.696497
-0.640696
-0.640575
-0.566171
-0.583871
-0.170735
-0.759847
0.288364
-0.569238
-0.0362509
-0.63652
-0.684078
-0.0154913
-0.477538
-0.141357
-0.708955
-0.689955
-0.291737
-0.447771
-0.407384
-0.593839
-0.593804
-0.5861
-0.639594
-0.0518398
-0.364176
-0.655991
-0.712535
-0.762775
0.535669
-0.5971
-0.544491
-0.550665
-0.557507
-0.657237
-0.0786794
-0.335211
-0.34427
-0.638967
-0.26935
-0.706226
-0.556832
-0.534878
-0.7424
-0.638395
-0.55447
-0.0518884
-0.657257
-0.542268
-0.449683
-0.479503
-0.391861
-0.626135
-0.649177
-0.737401
-0.586357
0.31661
-0.605383
-0.581479
-0.467645
-0.613242
0.178407
-0.623263
-0.170568
-0.589386
-0.59403
-0.663014
-0.582461
-0.555792
-0.58939
-0.369816
-0.598406
-0.656558
-0.60565
-0.233262
-0.724766
-0.54156
-0.622758
-0.549152
-0.623926
-0.691862
-0.598683
-0.632744
-0.62071
-0.606137
-0.674051
-0.501311
-0.551432
0.624403
-0.259069
0.241471
-0.607781
-0.191055
-0.647433
-0.665571
-0.28871
-0.253574
-0.600296
-0.57395
-0.584277
-0.590491
-0.45018
-0.622853
-0.619587
-0.665875
-0.61413
-0.593029
-0.66293
-0.677895
-0.637303
-0.567774
-0.532876
-0.506418
-0.544011
-0.29361
0.0165938
-0.692648
-0.599781
-0.611762
-0.58694
-0.64835
-0.634629
0.173463
-0.466365
-0.617295
-0.440733
-0.677709
-0.63533
-0.663189
-0.616612
0.217376
-0.585097
-0.668497
-0.484215
-0.63816
-0.734105
-0.734133
-0.573091
-0.672071
-0.599931
-0.691822
-0.479455
-0.320444
-0.553798
-0.769961
-0.501239
-0.750995
0.423622
-0.551927
-0.529288
-0.563639
-0.658578
-0.610409
-0.638753
-0.670102
-0.762324
-0.598098
0.0872094
-0.63521
-0.535832
-0.220311
-0.570246
-0.684179
-0.783411
-0.682329
-0.566017
-0.590374
-0.549002
0.0311344
-0.654658
-0.554432
-0.108403
-0.43219
-0.663589
-0.646633
-0.766818
-0.120363
-0.626245
-0.671022
-0.736549
0
-0.673047
-0.636834
-0.577398
-0.649724
-0.7507
-0.549445
-0.624708
-0.568882
-0.582761
-0.156541
-0.640653
0.326303
-0.392435
-0.595111
-0.808223
-0.613761
-0.664821
0.239791
-0.590917
-0.108904
-0.593105
-0.324246
-0.654127
-0.613361
-0.0381502
-0.60048
-0.365871
-0.718124
-0.65108
0.735409
-0.405226
-0.541526
-0.54348
-0.160116
-0.666578
-0.707592
-0.617363
-0.697583
-0.580742
-0.624336
-0.390501
-0.545484
-0.565794
0.284949
-0.603204
-0.682092
-0.749365
-0.666289
-0.680114
-0.564891
-0.438319
-0.689585
-0.355865
-0.57334
-0.338669
-0.671057
-0.376881
-0.502866
-0.600861
-0.449778
-0.537627
-0.561299
-0.730016
-0.640972
-0.561172
-0.623819
-0.619972
-0.212429
-0.535964
-0.615679
-0.714674
-0.638382
-0.60052
-0.676215
-0.736957
-0.528726
-0.501709
-0.538582
-0.7871
0.0728389
0.294095
-0.634737
-0.592788
-0.597902
-0.227957
-0.556536
-0.644733
-0.599784
-0.559908
-0.667537
-0.641426
-0.599602
-0.637809
-0.624723
-0.708345
-0.53739
-0.715021
-0.552769
-0.732104
-0.671067
-0.663766
-0.734037
-0.652389
-0.466512
-0.438656
-0.598989
-0.621575
-0.58183
-0.171678
-0.367432
-0.293832
-0.635129
0.642982
-0.614285
-0.755924
-0.647862
-0.688104
0.0146384
-0.288863
0.0152695
-0.709759
-0.376871
-0.597785
0.29683
-0.552883
-0.681898
-0.624505
-0.663237
-0.610296
-0.541166
-0.57702
-0.480835
-0.114093
-0.6008
-0.58835
-0.634518
-0.666346
-0.587383
-0.392228
-0.453565
-0.544597
-0.0203393
-0.618415
-0.603202
-0.727644
-0.599016
-0.60503
0.161145
-0.623704
-0.537198
-0.692847
-0.637685
-0.553904
-0.598411
-0.665727
-0.178404
-0.661143
-0.613591
-0.441467
0.476352
0.073031
-0.558399
-0.588205
0.0654568
-0.718966
0.201048
-0.579616
-0.666478
-0.450291
-0.417326
-0.710733
-0.587174
0.242545
-0.730122
-0.152292
-0.614377
-0.536826
-0.741004
-0.611644
-0.584232
-0.161844
-0.373911
-0.424838
-0.692767
-0.556131
-0.707883
-0.475659
-0.672275
-0.614387
-0.634187
-0.162676
-0.665595
0.0946125
-0.212947
0.0238822
0.0658588
-0.453929
-0.686473
-0.687299
-0.59812
-0.606905
-0.637699
-0.679867
-0.455866
-0.618858
-0.536005
-0.674901
-0.61194
0.297016
0.382307
-0.563758
-0.690915
-0.50107
-0.53342
-0.666497
-0.711495
-0.249088
-0.618016
-0.657109
-0.628979
-0.160285
-0.536375
-0.64595
-0.604345
-0.582206
-0.637126
-0.675401
-0.670638
-0.740927
-0.582531
-0.540314
-0.634397
-0.469043
-0.64098
-0.322035
-0.684011
-0.607743
-0.691897
0.0154972
-0.254407
-0.739953
-0.217564
-0.630557
-0.636745
-0.429393
-0.671524
-0.623482
-0.627872
-0.664542
-0.675962
0.0353302
-0.622219
-0.149615
-0.506666
-0.728595
-0.62351
-0.596986
-0.598959
-0.0641456
-0.584414
-0.66287
-0.59746
-0.549395
-0.61293
-0.596194
-0.556103
-0.515281
-0.654396
-0.066209
-0.57199
-0.338758
-0.793269
-0.565642
-0.580995
-0.141569
0.0355477
-0.624389
-0.729189
-0.621838
-0.696106
-0.572999
-0.54283
-0.614491
-0.576819
-0.606822
-0.618168
0.196354
-0.692592
-0.171888
-0.642285
-0.578916
-0.636887
-0.577511
-0.598781
-0.608523
-0.554406
-0.662075
-0.679726
-0.0505479
-0.70235
-0.541615
-0.645358
-0.130929
-0.590699
-0.553032
-0.5817
0.368386
-0.64138
-0.543078
-0.725485
-0.66051
-0.556254
-0.414313
-0.460141
-0.725504
-0.196088
-0.60655
-0.665373
-0.706937
-0.556477
-0.694717
-0.695144
-0.737743
-0.585019
-0.639593
-0.639258
0.25176
-0.645076
-0.226928
-0.728371
-0.155641
-0.646407
-0.693784
-0.691821
-0.634437
-0.606166
-0.221437
-0.689197
-0.549707
-0.634188
-0.786853
-0.614613
-0.636847
-0.102836
-0.726286
-0.785681
-0.648262
-0.576163
-0.739903
-0.629652
-0.647128
-0.596273
-0.589889
-0.677239
-0.621466
-0.711478
-0.58929
-0.619972
-0.605454
-0.642427
-0.594141
-0.686672
-0.156898
-0.490882
-0.610076
0.543665
-0.721114
-0.702972
-0.677588
-0.228494
-0.594795
-0.566119
-0.568251
-0.158361
-0.59341
-0.70362
-0.67172
-0.640365
-0.652856
-0.273766
-0.622001
-0.603532
-0.46595
-0.707867
-0.721346
-0.654358
-0.64459
-0.338759
-0.0518069
-0.565855
-0.654099
-0.541329
-0.565788
-0.554254
-0.691482
-0.553923
-0.681355
0.102854
-0.59302
-0.580843
-0.377132
-0.577211
-0.599455
-0.569139
-0.639821
-0.65428
-0.212145
-0.294282
0.259194
-0.570942
-0.286555
-0.649587
-0.346495
-0.610467
-0.636897
-0.389632
-0.146694
-0.668641
-0.592078
-0.635888
-0.602322
-0.722462
0.241261
-0.630892
-0.658953
-0.596751
-0.202178
-0.243029
-0.62164
-0.331132
-0.554188
-0.601003
-0.77522
0.479738
-0.532044
-0.598719
-0.657599
-0.614148
-0.848004
-0.0881568
-0.685072
-0.711175
-0.674208
-0.647738
-0.621578
-0.595528
0.0239466
-0.623806
-0.669036
-0.55937
-0.763865
-0.671534
-0.592615
-0.765994
-0.266736
-0.635488
0.633751
-0.640495
-0.55926
-0.610986
-0.641297
-0.648091
-0.541333
-0.500312
-0.70731
-0.632473
0.0657657
-0.634127
-0.591194
-0.684018
-0.683214
0.161183
-0.135519
-0.212619
-0.505362
-0.553282
-0.602757
-0.105844
-0.646402
-0.460277
-0.391578
0.324673
-0.608518
-0.648742
-0.732752
-0.711675
-0.68725
-0.696221
-0.621379
-0.666938
-0.691941
-0.576872
-0.636877
-0.73521
-0.0872383
-0.589395
-0.601116
-0.723027
-0.620355
-0.549468
-0.479687
-0.364839
-0.649233
-0.179058
-0.389294
-0.587095
-0.667635
-0.521952
0.269411
-0.4668
-0.600514
-0.521223
-0.267943
-0.285697
-0.619144
-0.600453
0.115179
-0.62025
-0.582223
-0.760419
-0.527584
-0.631528
0.172013
-0.659097
-0.694109
-0.67669
-0.575705
-0.613741
-0.703459
-0.468006
-0.10823
-0.71212
-0.682156
-0.200603
-0.697549
-0.0517536
-0.465036
0.0152774
-0.559848
-0.77039
-0.754815
-0.716293
0.219364
-0.661439
-0.541937
-0.136842
-0.330406
-0.663585
-0.506549
-0.32206
-0.719522
-0.573396
-0.625565
-0.782597
-0.607371
-0.511205
-0.678495
-0.709566
-0.641458
0.173851
-0.619489
-0.622322
-0.454126
-0.674677
-0.629483
-0.59882
-0.676771
-0.315466
-0.76476
-0.59652
-0.181341
-0.378462
-0.466319
-0.649557
-0.4484
-0.585591
-0.640214
-0.697797
-0.676199
-0.225039
-0.588507
-0.0742294
-0.429156
-0.729706
-0.553976
-0.685383
-0.600679
-0.656843
-0.658091
-0.708955
-0.55651
-0.405623
0.0623293
-0.349623
-0.639044
-0.685027
-0.350225
-0.570544
-0.709294
-0.591627
0.566312
-0.640492
-0.638946
0.412884
-0.504006
-0.566434
-0.506373
-0.565214
-0.57684
0.572525
-0.117801
-0.58048
-0.640494
-0.687365
-0.594303
-0.168262
-0.553889
-0.35657
-0.648516
-0.739111
-0.728773
-0.590511
-0.574329
-0.62731
0.149849
0.373484
-0.741232
