# Supplementary material for: Full assembly of HIV-1 particles requires assistance of the membrane curvature factor IRSp53
Source: eLife journal article supplement (doi:10.7554/elife.67321), 2021-06-11
Supplement: supp [file elife_poa_e67321_Figure_1_figure_supplement_2.pdf › elife_poa_e67321_Figure_1_figure_supplement_2.pdf]

**a**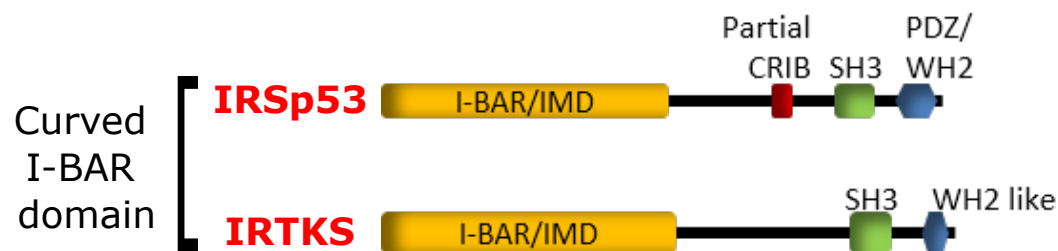**b**

## IRTKS-IRSp53 proteins sequences alignment

| Score          | Expect                                                             | Method                       | Identities   | Positives    | Gaps        |
|----------------|--------------------------------------------------------------------|------------------------------|--------------|--------------|-------------|
| 396 bits(1017) | 7e-137                                                             | Compositional matrix adjust. | 216/539(40%) | 320/539(59%) | 56/539(10%) |
| Query 7        | EEMHRLTENYKTIMEQFNPSLRNFIAMGKNYEKALAGVTYAAKG YFDALVKMGELASES       |                              |              |              | 66          |
| Sbjct 6        | EE++RLTE+ Y+ +MEQFNP LRN I +GKNYEKA+ + A K Y+D + K+GE+A+ S         |                              |              |              | 65          |
| Query 67       | QGSKELG DVL FQMAEVHRQIQNQL EEM LKSFHNELLTQLEQKV ELDSRYLSAALKKYQTE  |                              |              |              | 126         |
| Sbjct 66       | PVSTELGHV LIEISSTHKKLNESLDENFKFKFHEKIIHELEKKI EL DVKYM NATL KRYQTE |                              |              |              | 125         |
| Query 127      | QRSKGDALDKCQAE LKKLRKKSQGSKNPQKYS DKELQYIDAI SNKQGELENYVSDGYKTA    |                              |              |              | 186         |
| Sbjct 126      | HKNKLESLEKSQAE LKKIRRKSGSRNALKYEHKEIEYVETVTSRQSEIQKF IADGCKEA      |                              |              |              | 185         |
| Query 187      | LTEERRRFCFLVEKQCAVAKNSAAYHSGKELLAQKLPLWQQACADPSKIPERAVQLMQQ        |                              |              |              | 246         |
| Sbjct 186      | LLEEKRRRFCFLVDRKHC GFANHIHYH LQSAELLNSKLPRWQETCVD AIKVPEKIMNMIEE   |                              |              |              | 245         |
| Query 247      | VASNGATLPSALSASKSNLVISDPIPGAKPLFPVPELAPFVGRMSAQESTPIMNGVTGPD       |                              |              |              | 306         |
| Sbjct 246      | IKT-----PASTPVS GTPQASPMIERSNVVR-----                              |                              |              |              | 271         |
| Query 307      | GEDYSPWADRKAAPKSLSP PQSQSKLSDSYSN---TLPVRKSVTPKNSYATTENKTLPR       |                              |              |              | 363         |
| Sbjct 272      | -KDYDTLSKCS PKMPPAPSGRAYTSPLIDMFNNPATAAPNSQRVN--NSTGTSEDPSLQR      |                              |              |              | 328         |
| Query 364      | SSSMAAGLERNGRM RVKAI FSHAAGDNSTLLSFKEGDLITLLVPEARDGWHYGESEKTKM     |                              |              |              | 423         |
| Sbjct 329      | SVSVATGLNMMKKQKVKTIFPHTAGSNKTLLSFAQGDVITLLIPEEKDGWLYGEHDVSKA       |                              |              |              | 388         |
| Query 424      | RGWFPPFSYTRVLDS DGS DRLHM---SLQQGKSSSTGNLLDKDDLAI PPPDY-----G      |                              |              |              | 472         |
| Sbjct 389      | RGWFPPSYTKLLEENETEAVTVPTPSPTFVRSISTVNLSSENSSVVIPPDPYLECLSMGAA      |                              |              |              | 448         |
| Query 473      | AASRAFP AQTASGFK---QRPYSVAVPAFSQGLDDYGARMSRNPF AHVQLKPTVTNDR       |                              |              |              | 528         |
| Sbjct 449      | ADRRADSARTTSTFKAPASKP-ETAAPNDANGTAKPPFLS-GENPFATVKLRPTVTNDR        |                              |              |              | 505         |
