# Supplementary material for: Full assembly of HIV-1 particles requires assistance of the membrane curvature factor IRSp53
Source: eLife journal article supplement (doi:10.7554/elife.67321), 2021-06-11
Supplement: supp [file elife_poa_e67321_Figure_3_figure_supplement_4.pdf › elife_poa_e67321_Figure_3_figure_supplement_4.pdf]

Thunderstorm  
reconstructed  
PALM image

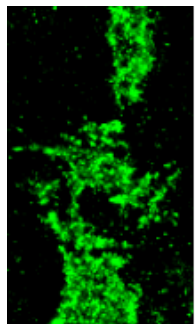

①

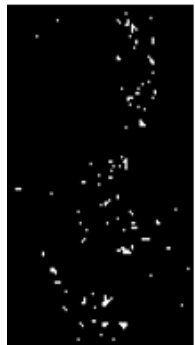

②

Assembly sites  
segmented image

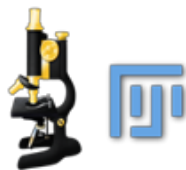

③

matrix of x,y  
coordinates  
of assembly  
sites centers

④

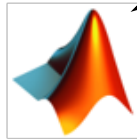

MATLAB

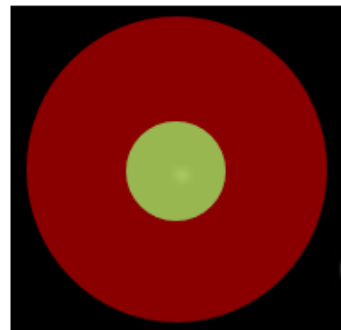

⑥

CBC  
analysis

⑤

Filtered  
PALM

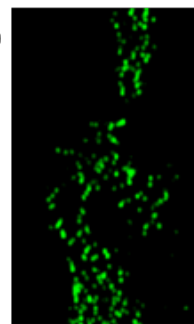

Filtered  
STORM

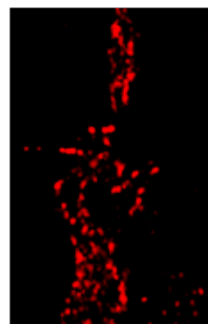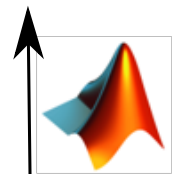

MATLAB
