# Supplementary material for: Full assembly of HIV-1 particles requires assistance of the membrane curvature factor IRSp53
Source: eLife. 2021 Jun 11;10:e67321. doi: 10.7554/eLife.67321 (PMC8260224; doi:10.7554/eLife.67321)
Supplement: Supplementary file 1. [file elife-67321-supp1.xlsx]

## Sheet: Sheet1
Reagent/Resource	Reference or Source	Identifier or Catalog Number
	Source (public): Stock center, company, other labs Reference: list relevant study (e.g. Smith et al, 2017) if referring to previously published work; use “this study” if new. If neither applies: briefly explain.	Provide catalog numbers, stock numbers, database IDs or accession numbers, RRIDs or other relevant identifiers.
Experimental Models
List cell lines, model organism strains, patient samples, isolated cell types etc. Indicate the species when appropriate.
HEK293T (H. sapiens)	ATCC-CRL-1575TM
Jurkat T cells (H. sapiens)	ATCC-CRL-2899TM
Mycoplasma detection kit	MycoAlertTM Mycoplasma Detection Kit (LT07-118 )
Recombinant DNA
Indicate species for genes and proteins when appropriate
pGag(myc) - optimized HIV-1 Gag	Thomas et al., 2015
pGag(i)mEos2	Floderer et al., 2018
pGagΔp6(i)mEos2	Floderer et al., 2018
pNL-43ΔPolΔEnv	Eric Freed/Chen et al., 2014
pNL-43 HIV-1 wt	NIH AIDS Reagent Program
pNL-43ΔEnv	NIH AIDS Reagent Program
human IRSp53-GFP	Pekka Lappalainen/Saarikangas et al., 2009
mouse IRSp53 I-BAR-GFP	Pekka Lappalainen/Saarikangas et al., 2009
human IRTKS-GFP	Pekka Lappalainen/Saarikangas et al., 2009
PH-PLCδ-GFP (PH domain of human Phospholipase C delta)	Bruno Beaumelle (IRIM UMR9004 CNRS)
Antibodies
Include the name of the antibody, the company (or lab) who supplied the antibody, the catalogue or clone number, the host species in which the antibody was raised and mention whether the antibody is monoclonal or polyclonal. Please indicate the concentrations used for different experimental procedures.
Rabbit polyclonal anti-IRSp53 (1:3000 WB, 1:100 IF)	Merck Millipore Sigma	07-786
Rabbit polyclonal anti-IRTKS (1:3000 WB, 1:100 IF)	Bethyl	A304-831A
Rabbit polyclonal anti-beta-Tubulin-HRP (1:1000)	Abcam	ab21058
Goat polyclonal anti-Actin HRP (1:1000)	Santa Cruz	sc-1616
Mouse monoclonal anti-GAPDH-HRP (1:5000 WB)	Sigma	G9295
Mouse monoclonal anti-Capsid p24 (1:5000 WB)	NIH AIDS Reagent Program	ARP-6457
Rabbit polyclonal anti-Tsg101 (1:5000 WB)	Abcam	ab125011
Rabbit polyclonal anti-ALIX (1:1000 WB)	CovaLabs	pab0204
Mouse monoclonal anti-Lamp2 (1:5000 WB)	Santa Cruz	sc-18822
Rabbit polyclonal Atto647N (1:2000 IF)	Sigma	40839
Rabbit polyclonal anti-GFP antibody (1:1000 WB)	Invitrogen	A11122
mouse monoclonal anti-human CD81 tetraspanin (1:500 WB)	Santa Cruz	sc-23962
mouse monoclonal anti-human CD63 tetraspanin (1:500 WB)	Santa Cruz	sc-5275
Oligonucleotides and sequence-based reagents
For long lists of oligos or other sequences please refer to the relevant Table(s) or EV Table(s)
siRNA Stealth IRSp53 (BAIAP2)	Invitrogen	HSS 145642
siRNA Stealth IRTKS (BAIAP2L1)	Invitrogen	HSS 125278
siRNA IRSp53 (BAIAP2)	Dharmacon, Invitrogen, Sigma	Dharmacon L-012206-02-0005/ Sigma PDSIRNA2D
Chemicals, enzymes and other reagents
e.g. drugs, peptides, recombinant proteins, dyes etc.
HIV-1 pr55 Gag purified soluble protein	Johnson Mak/Yandrapalli et al., 2014
IRSp53-IBAR purified soluble protein	John Manzi/Prèvost et al. 2015
AlexaFluor-488 C5 Maleimide	Invitrogen Inc.	A10254
Software
Include version where applicable
MATLAB 2011a	MathWorks Inc.
FIJI ImageJ	Schindelin et al. 2013
Other
Kits, instrumentation, laboratory equipment, lab ware etc. that are critical for the experimental procedure and do not fit in any of the above categories can be listed here.
Abbelight Smart Kit	Abbelight	SMART-KIT I
Slide-A-Lyzer Mini Dialysis Device	ThermoScientific	69570
