# Supplementary figures and images for: Full assembly of HIV-1 particles requires assistance of the membrane curvature factor IRSp53
Source: eLife journal article supplement (doi:10.7554/elife.67321), 2021-06-11

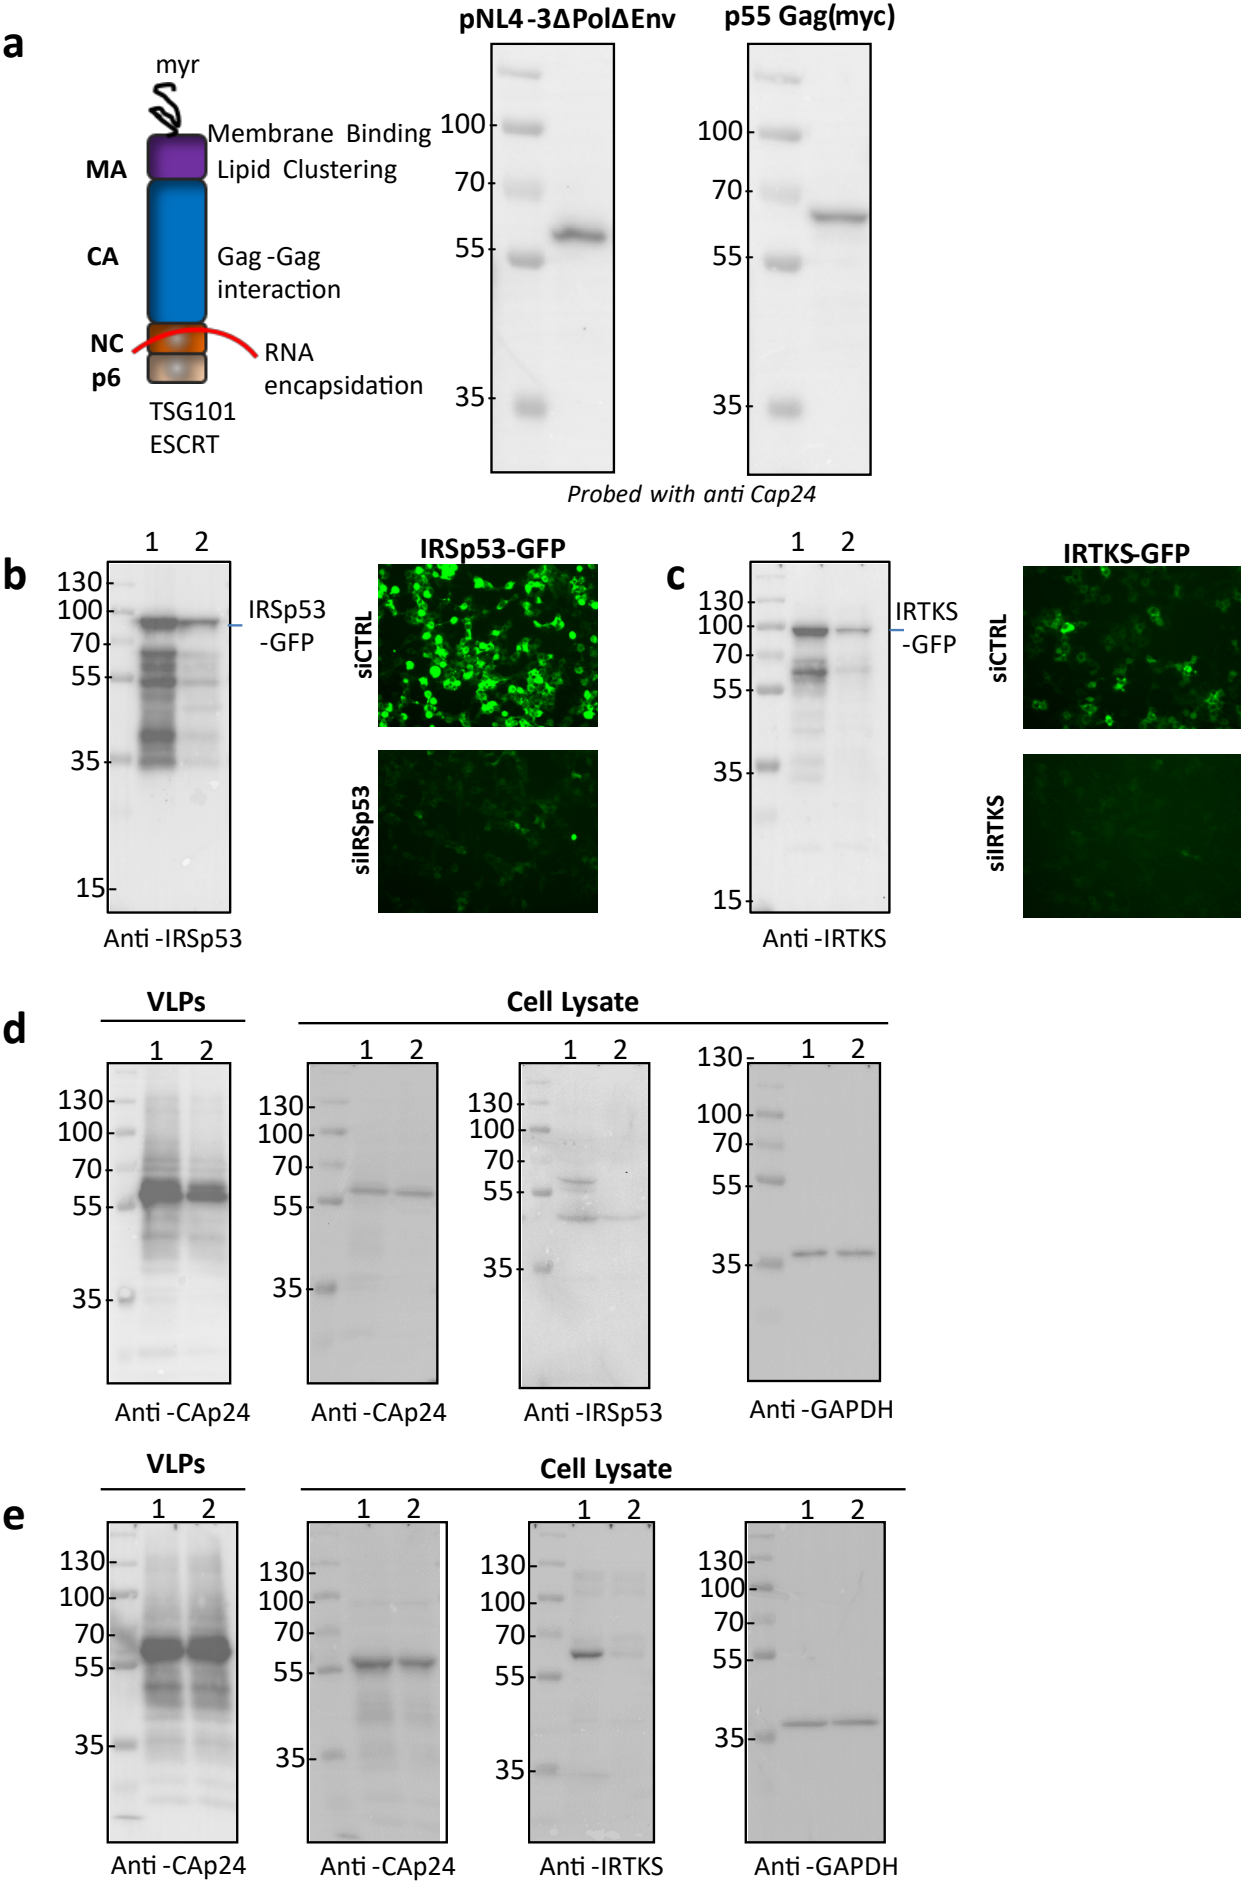

Supplement: supp [file elife_poa_e67321_Figure_1_figure_supplement_1.pdf › elife_poa_e67321_Figure_1_figure_supplement_1.pdf]

**a**

## HIV-1 Gag + siCTRL

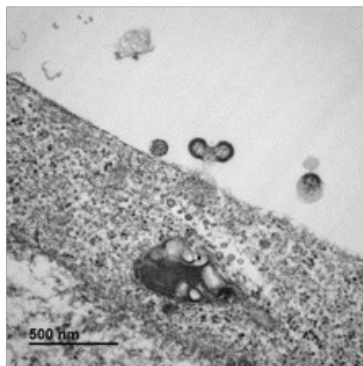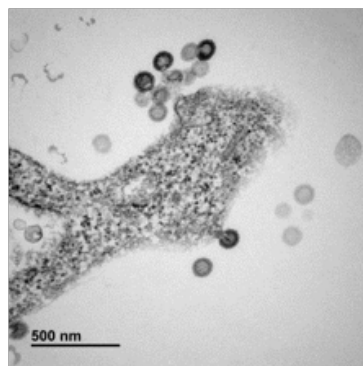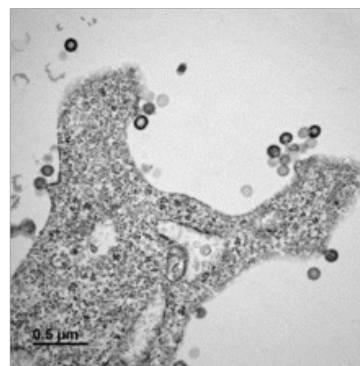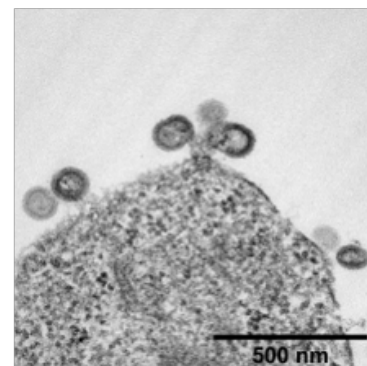**b**

## HIV-1 Gag + siIRSp53

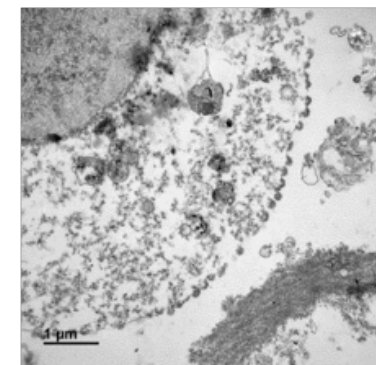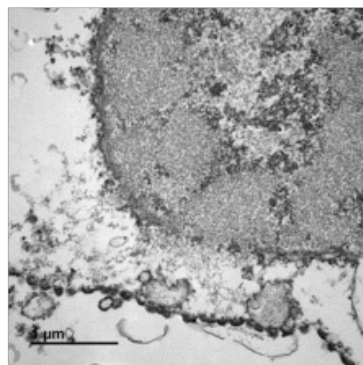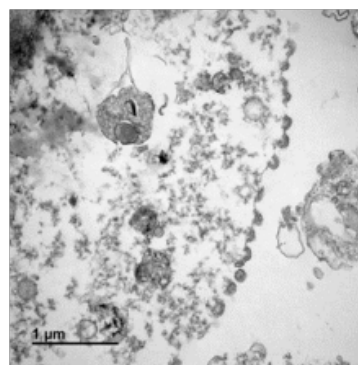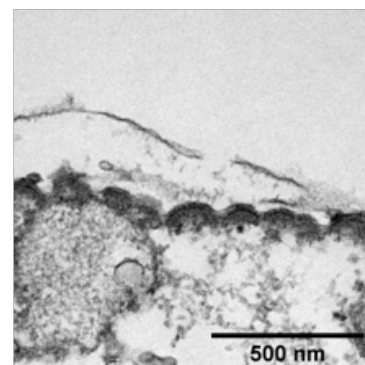

Supplement: supp [file elife_poa_e67321_Figure_1_figure_supplement_3.pdf › elife_poa_e67321_Figure_1_figure_supplement_3.pdf]

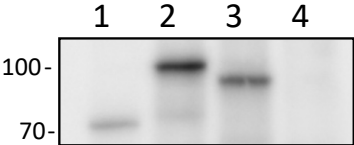

**IP  $\alpha$ IRSp53**

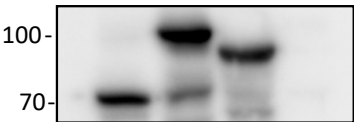

**Input**

*Anti-CAP24*

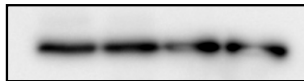

*GAPDH*

1. Gag
2. Gag(i)mEOS2
3. Gag(i)mEOS2 $\Delta$ p6
4. MOCK

Supplement: supp [file elife_poa_e67321_Figure_2_figure_supplement_1.pdf › elife_poa_e67321_Figure_2_figure_supplement_1.pdf]

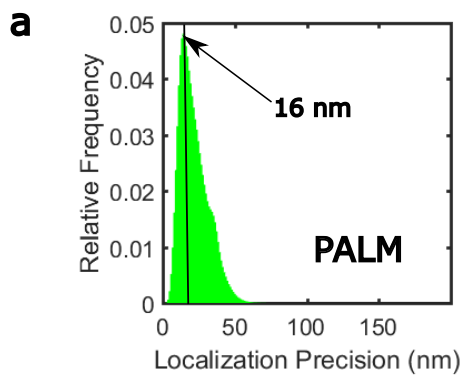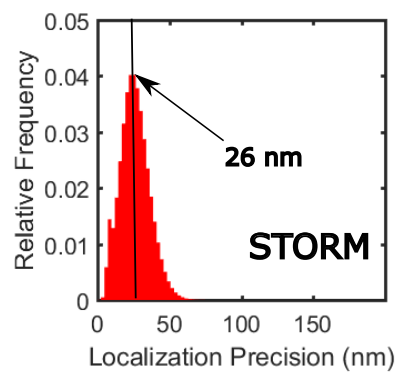

**b**

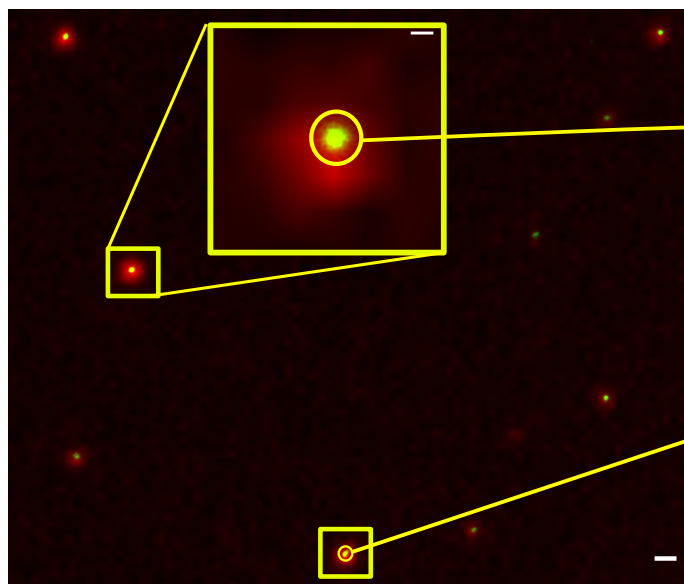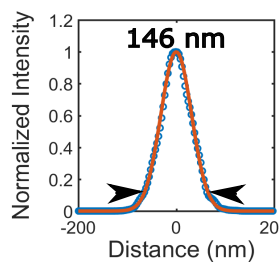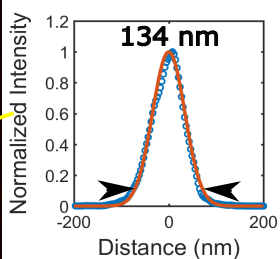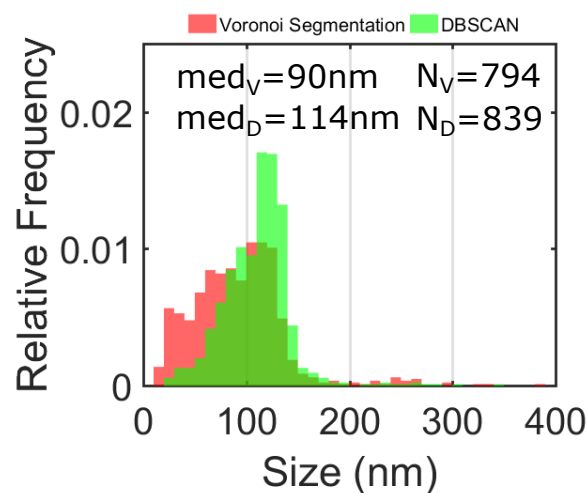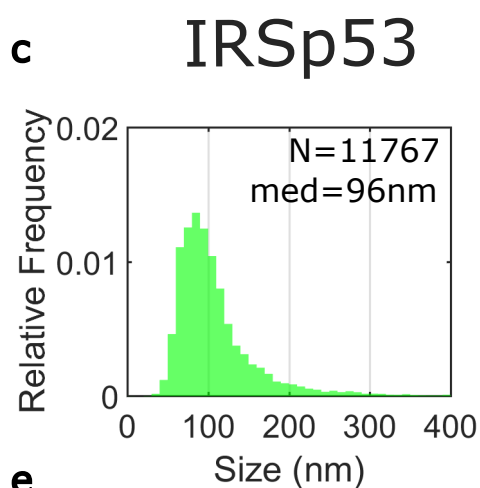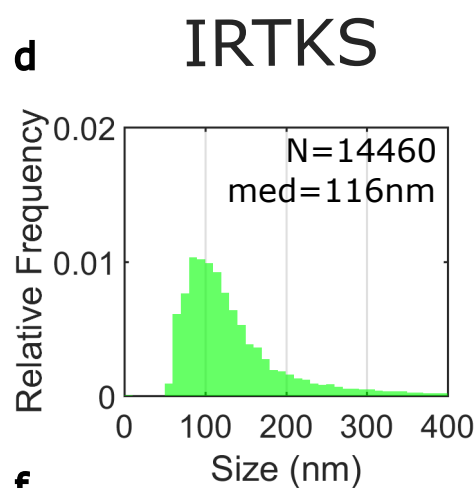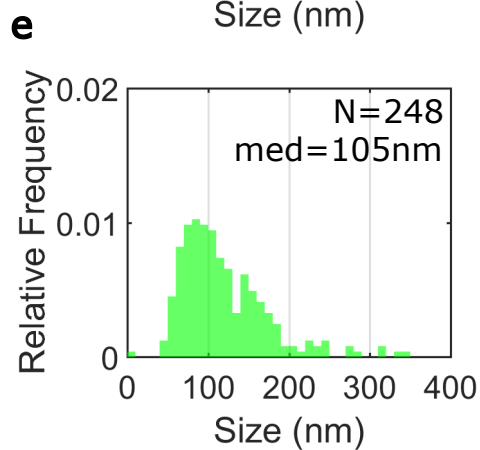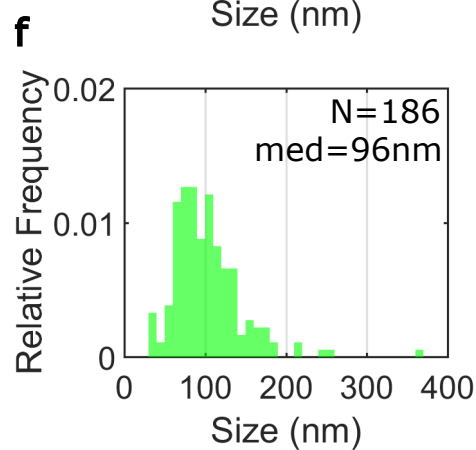

Jurkat T cells

HEK 293T

Supplement: supp [file elife_poa_e67321_Figure_3_figure_supplement_1.pdf › elife_poa_e67321_Figure_3_figure_supplement_1.pdf]

**a**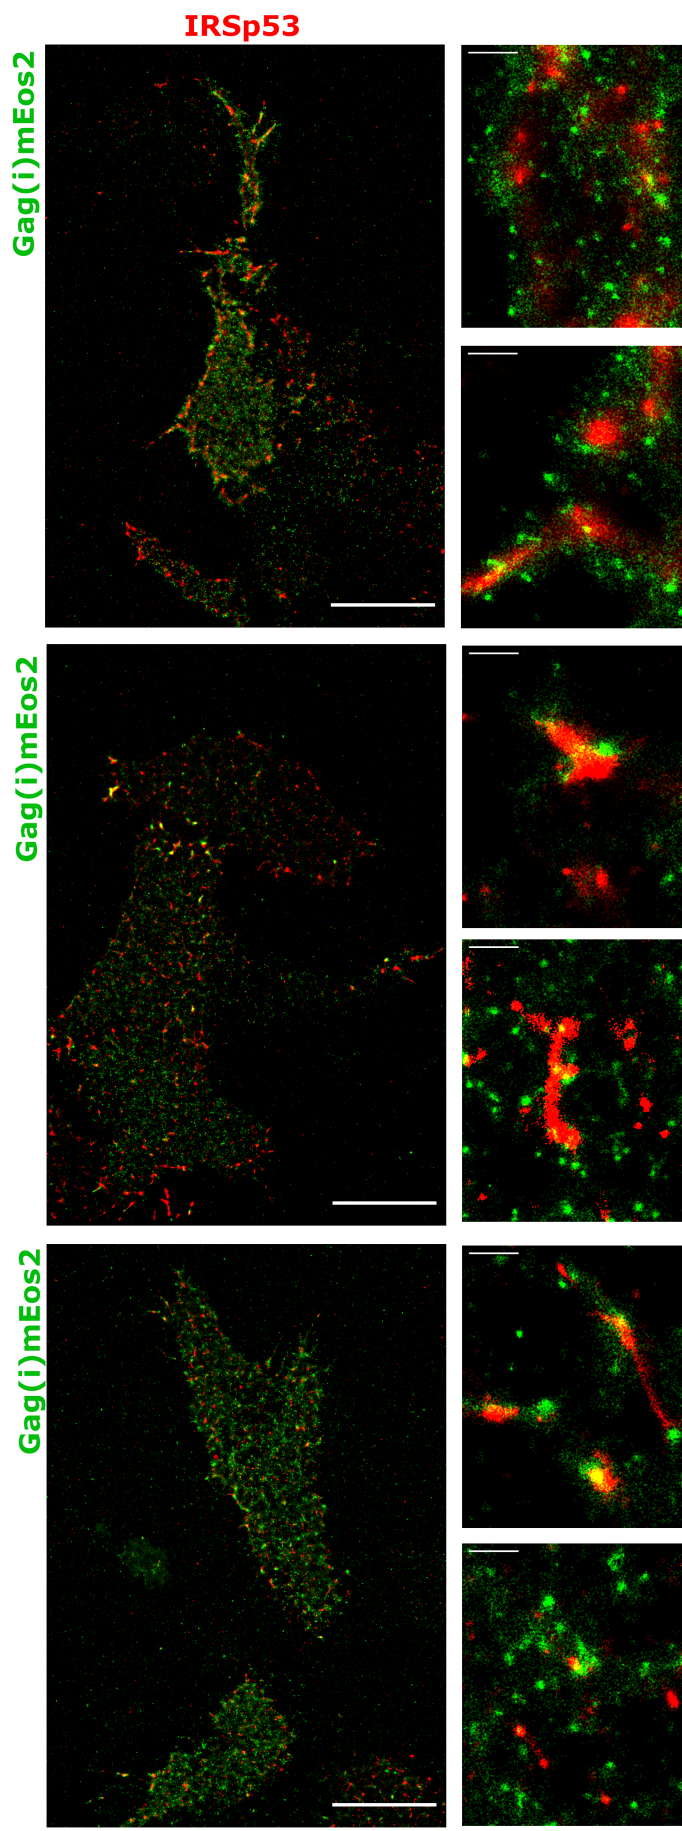**b**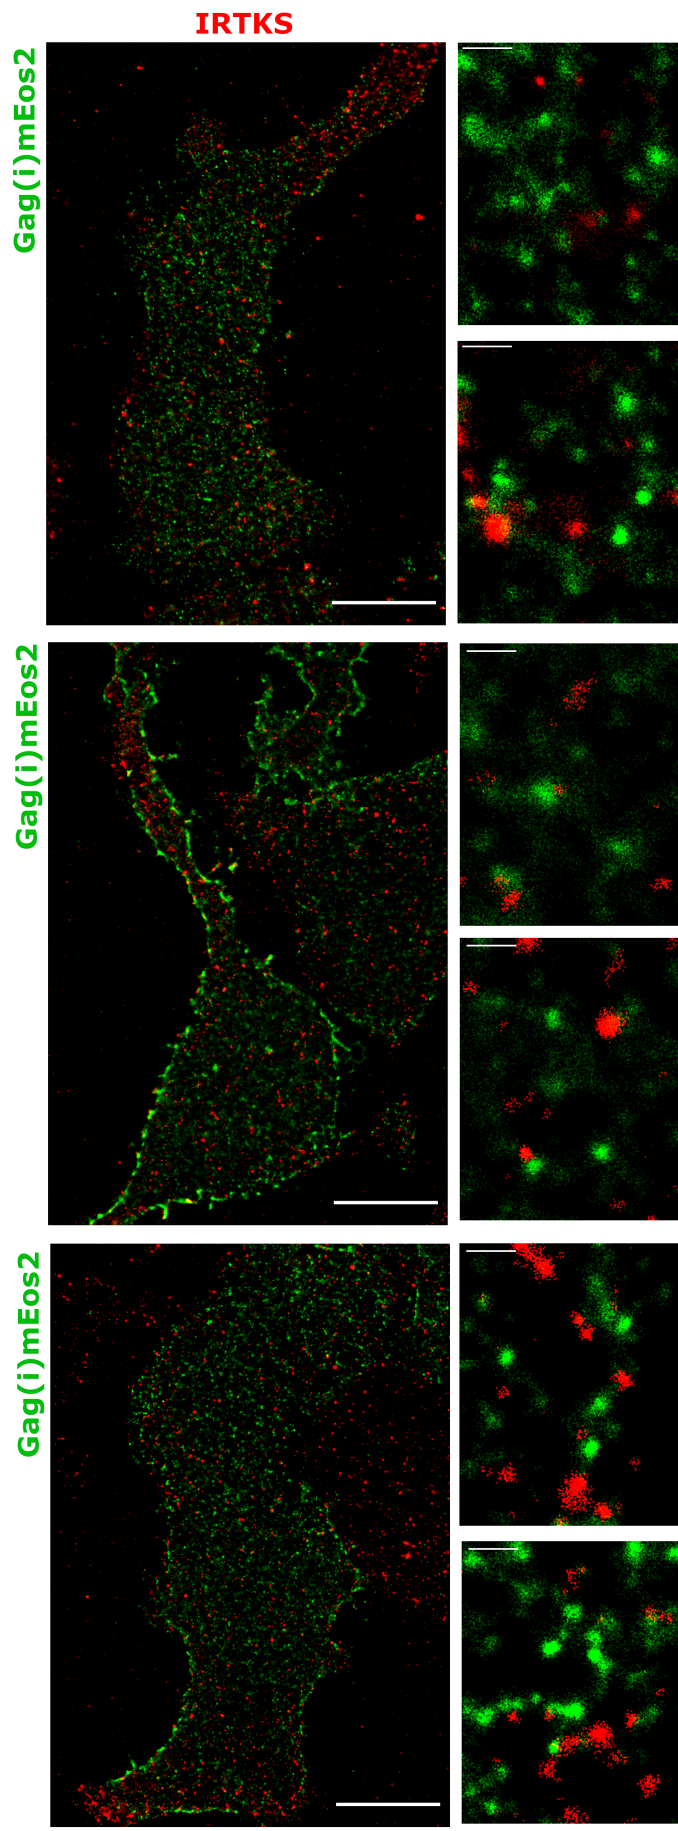

Supplement: supp [file elife_poa_e67321_Figure_3_figure_supplement_2.pdf › elife_poa_e67321_Figure_3_figure_supplement_2.pdf]

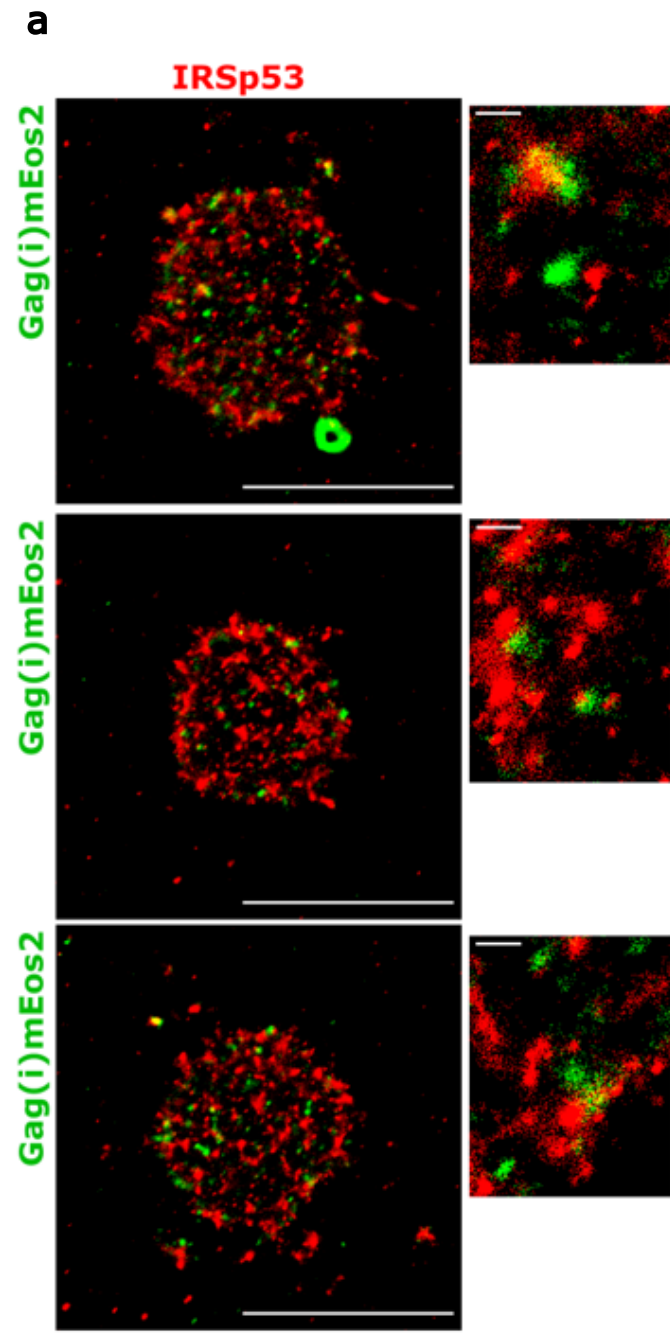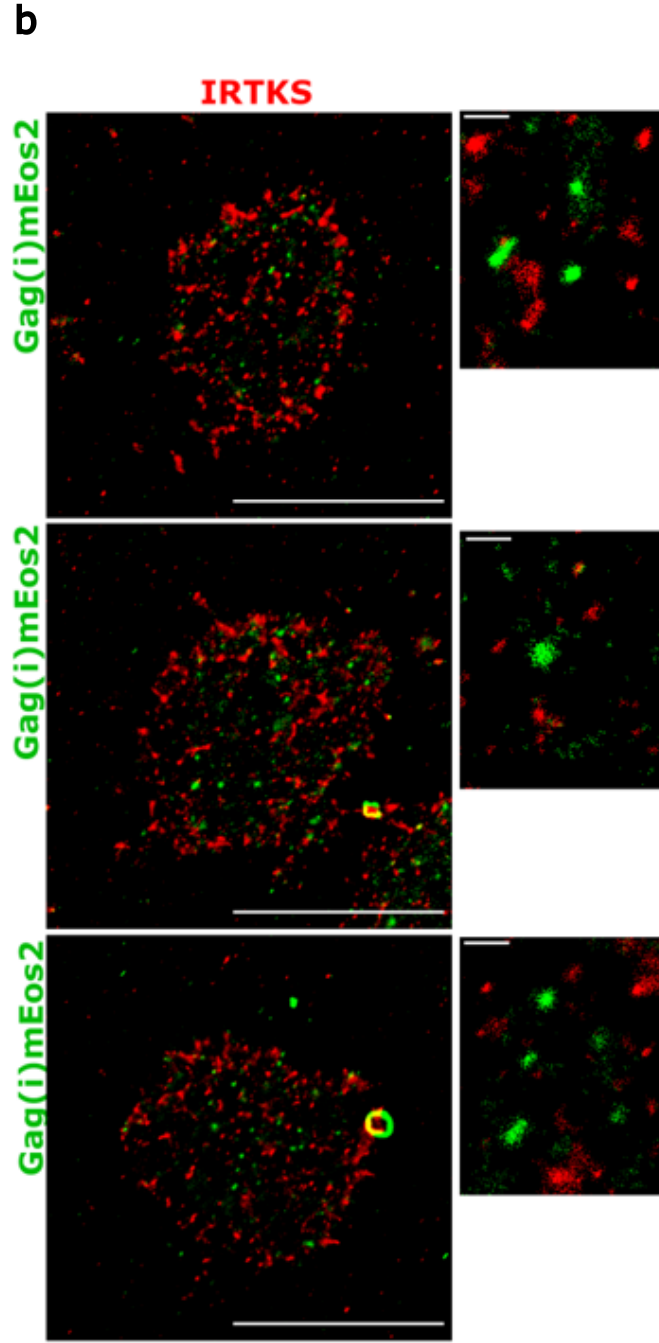

Supplement: supp [file elife_poa_e67321_Figure_3_figure_supplement_3.pdf › elife_poa_e67321_Figure_3_figure_supplement_3.pdf]

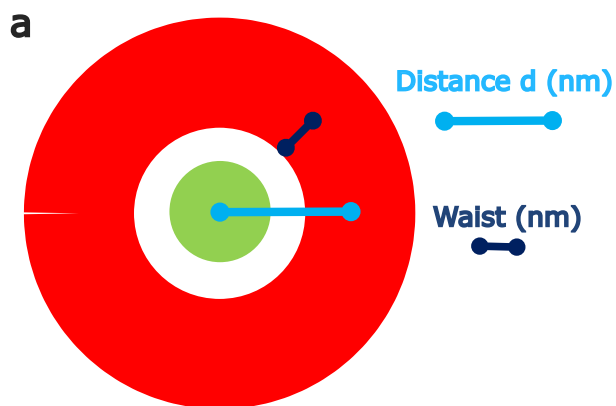

- PALM Localisations (Gag)
- STORM Localisations (IRSp53/IRTKS)

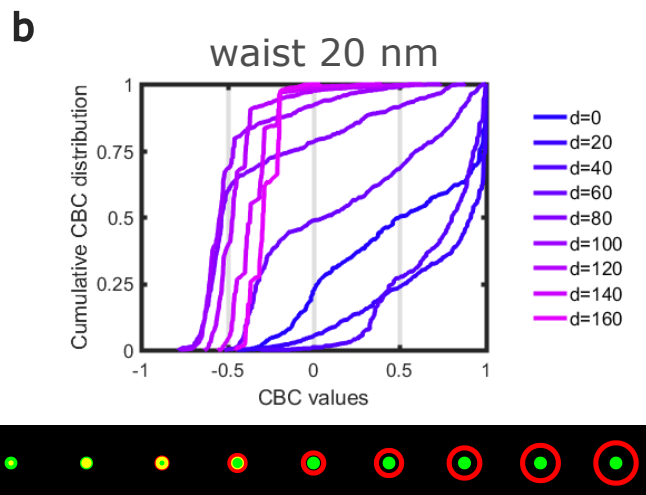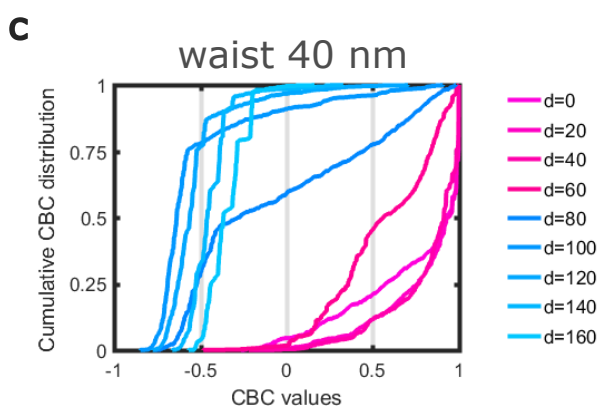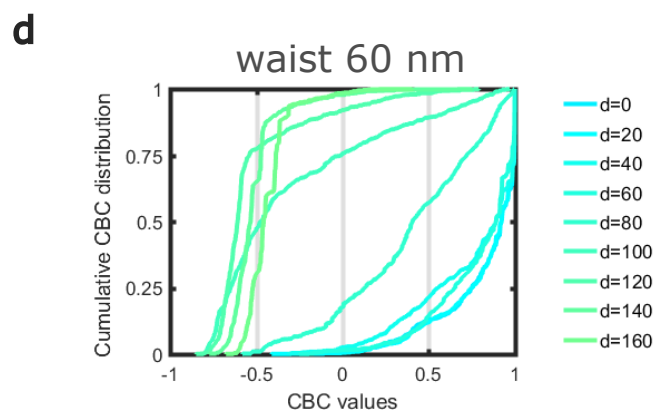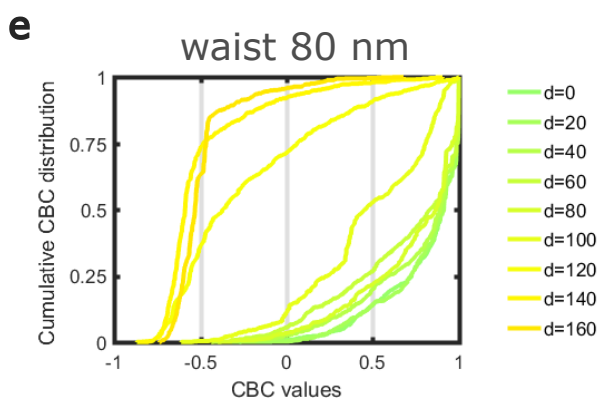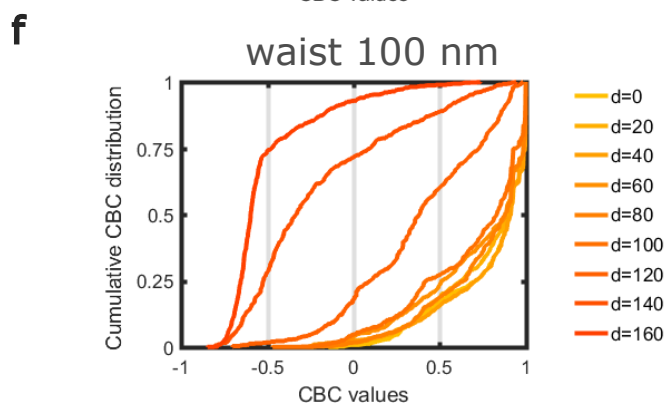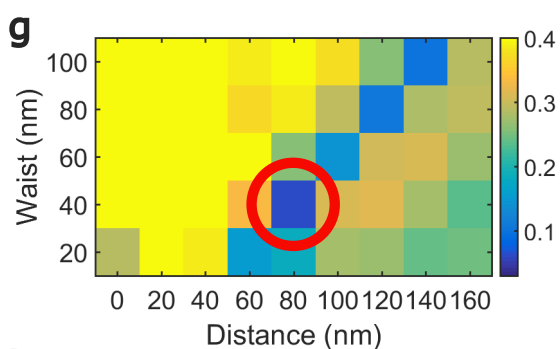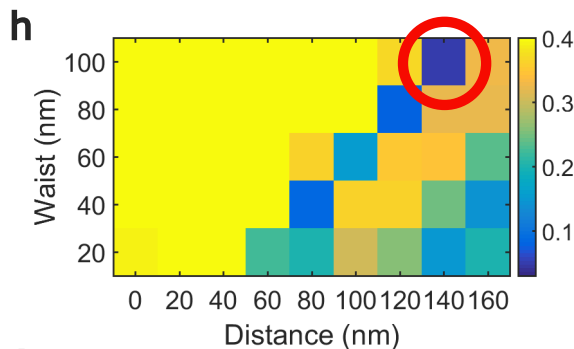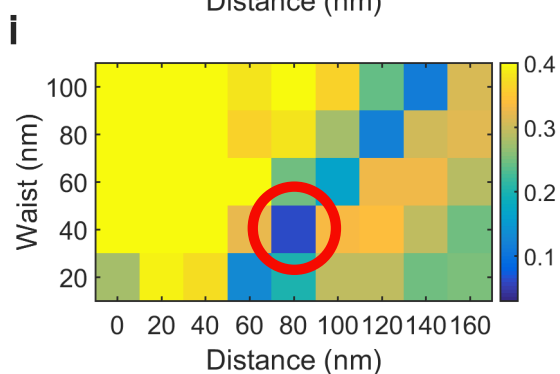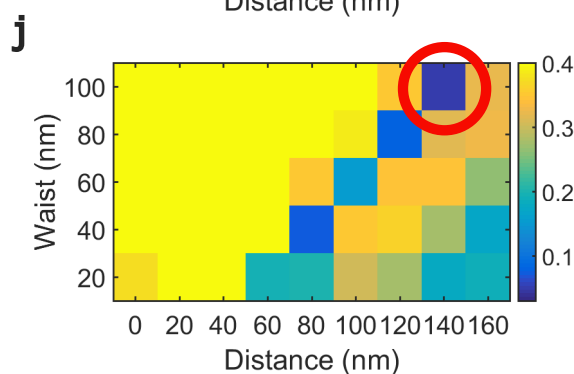

Supplement: supp [file elife_poa_e67321_Figure_4_figure_supplement_1.pdf › elife_poa_e67321_Figure_4_figure_supplement_1.pdf]

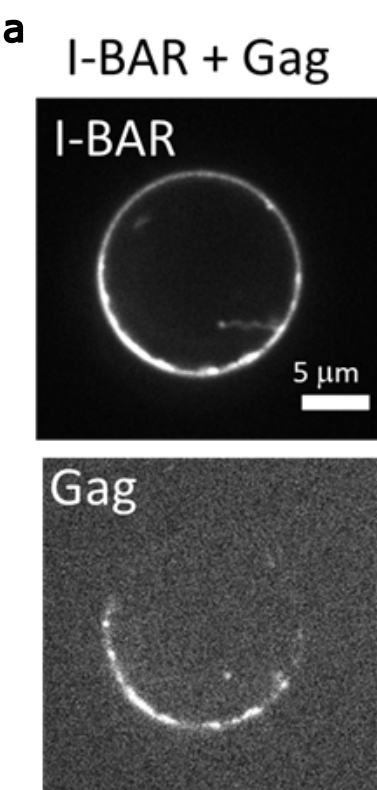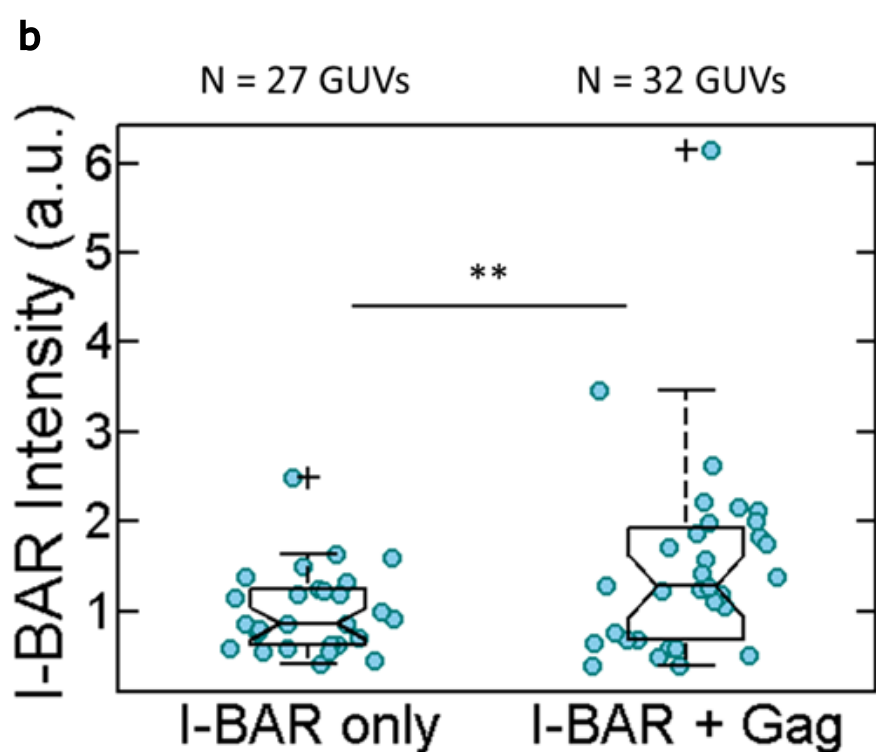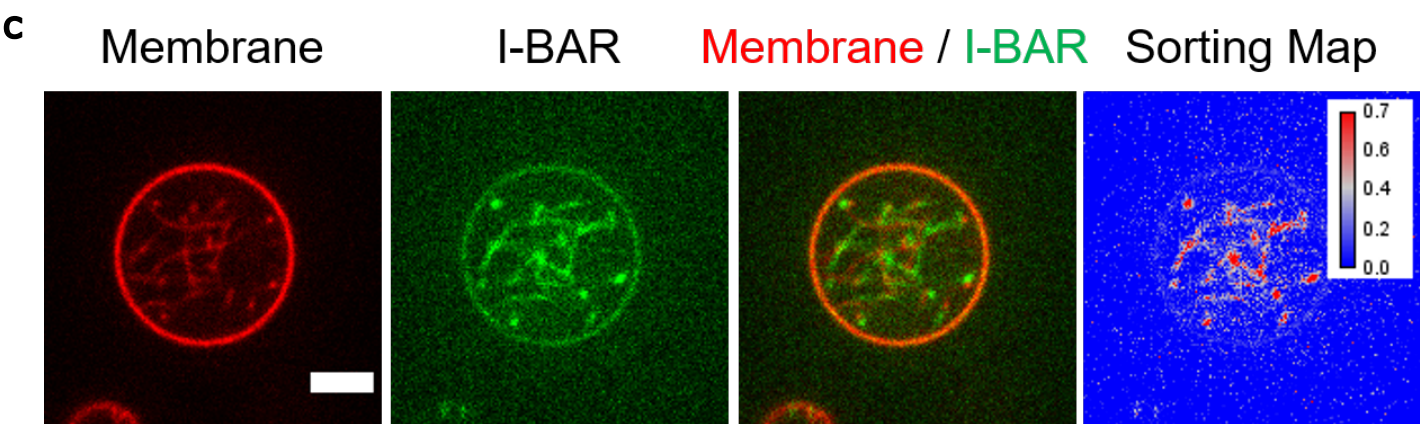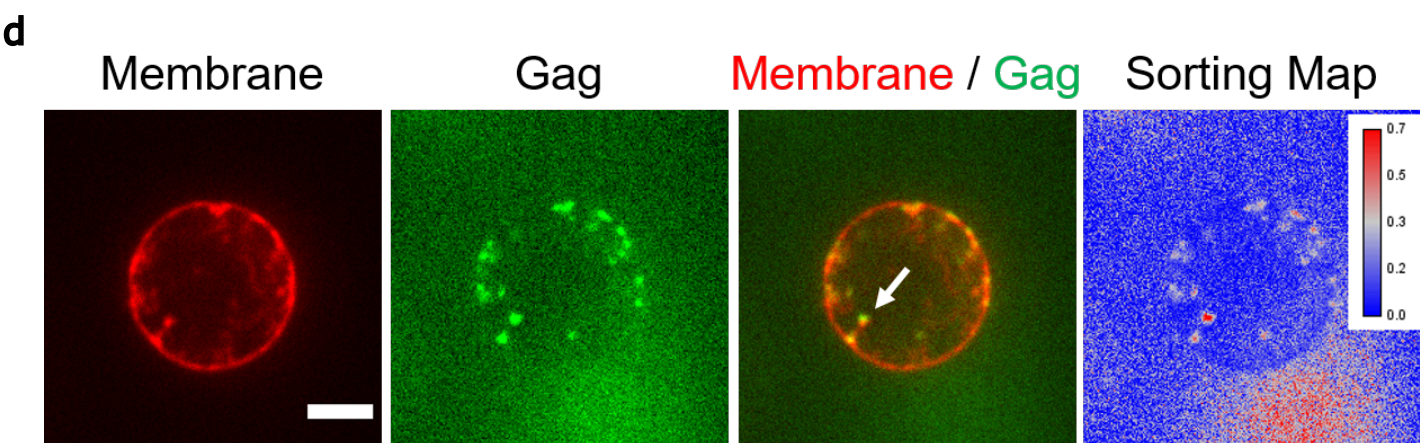

Supplement: supp [file elife_poa_e67321_Figure_6_figure_supplement_1.pdf › elife_poa_e67321_Figure_6_figure_supplement_1.pdf]

Membrane

Gag

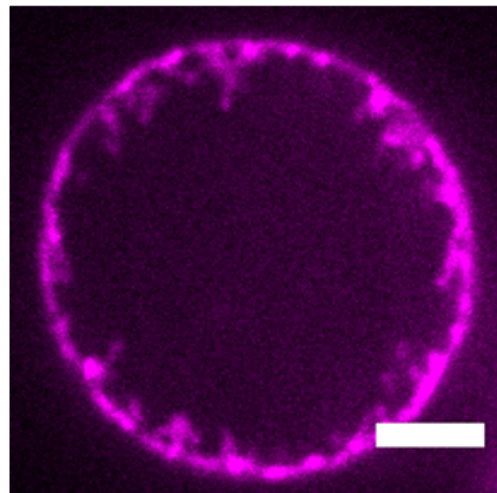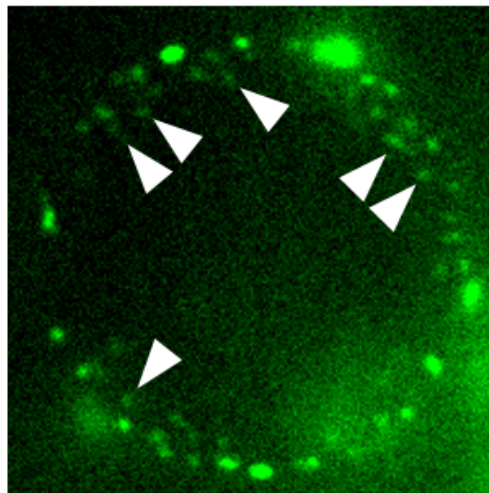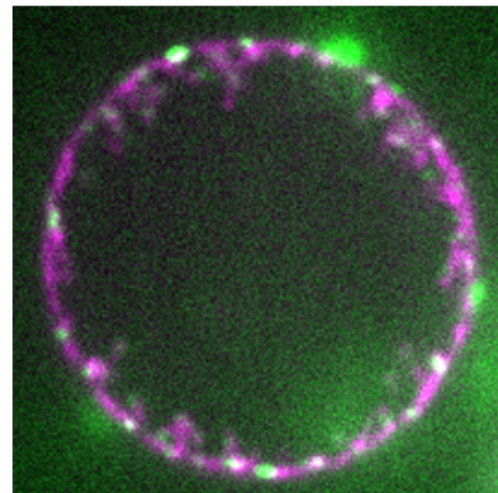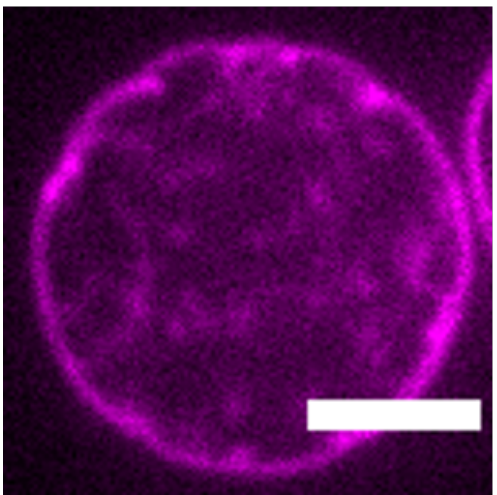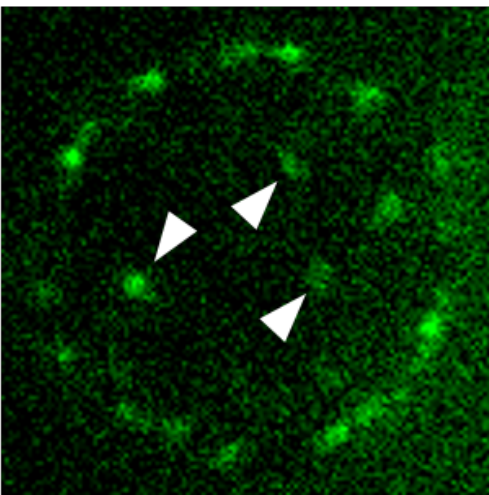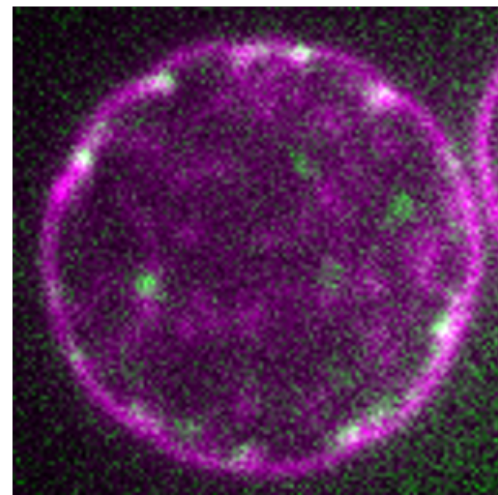

Supplement: supp [file elife_poa_e67321_Figure_6_figure_supplement_2.pdf › elife_poa_e67321_Figure_6_figure_supplement_2.pdf]
